# Supplementary material for: Copper nitrate-enabled ring expansion reaction of cyclopropanes: a direct approach to 3-cyano-isoxazoline N-oxides
Source: Royal Society of Chemistry journal article supplement (doi:10.1039/d3qo01991h), 2024-01-01

# Copper nitrate-enabled ring expansion reaction of cyclopropanes: A direct approach to 3-cyano-isoxazoline *N*- oxides

Yong Deng,<sup>†,a</sup> Zhenkun Yang,<sup>†,a</sup> Yanze Li,<sup>†,a</sup> Xinyao Li,<sup>\*,a</sup> and Bin Xu<sup>\*,a,b,c</sup>

<sup>a</sup> Department of Chemistry, Affiliated Nantong Hospital of Shanghai University (The Sixth People's Hospital of Nantong), Shanghai Engineering Research Center of Organ Repair, Innovative Drug Research Center, Shanghai University, Shanghai 200444, China.

<sup>b</sup> State Key Laboratory of Organometallic Chemistry, Shanghai Institute of Organic Chemistry, Chinese Academy of Sciences, Shanghai 200032, China.

<sup>c</sup> Joint International Research Laboratory of Biomaterials and Biotechnology in Organ Repair, Ministry of Education, China.

E-mail: xubin@shu.edu.cn, xinyaoli@shu.edu.cn

## Electronic Supplementary Information

### CONTENTS:

|                                                                                    |      |
|------------------------------------------------------------------------------------|------|
| 1. General Information.....                                                        | S2   |
| 2. Optimization of the Reaction Conditions.....                                    | S3   |
| 3. Unsuccessful Substrate Scope.....                                               | S4   |
| 4. Synthesis and Characterization of Substrates and Products.....                  | S4   |
| 5. Further Transformation of Product <b>2a</b> .....                               | S17  |
| 6. Synthesis of Nitrosolacetols <b>9</b> .....                                     | S18  |
| 7. X-Ray Crystallographic Analysis for Compounds <b>2a</b> and <b>9a</b> .....     | S23  |
| 8. Mechanistic Studies .....                                                       | S24  |
| 9. Details of Calculation and Discussion.....                                      | S25  |
| 10. References.....                                                                | S39  |
| 11. Copies of <sup>1</sup> H, <sup>13</sup> C and <sup>19</sup> F NMR Spectra..... | S39  |
| 12. Copies of NOESY Spectra.....                                                   | S150 |

## 1. General Information

All reagents and metal catalysts were obtained from commercial sources without further purification, and commercially available solvents were purified before use. All new compounds were fully characterized. All melting points were taken on a SGWX-4A Digital Melting Point Apparatus without correction. Infrared spectra were obtained using a Nicolet AVATAR 370 FT-IR spectrometer.  $^1\text{H}$ ,  $^{13}\text{C}$ , and  $^{19}\text{F}$  NMR spectra were recorded with a Bruker AV-500 spectrometer, a Bruker AV-600 spectrometer operating or JNM-ECZ400S spectrometer, respectively, with chemical shift values being reported in ppm relative to chloroform ( $\delta = 7.26$  ppm), acetone ( $\delta = 2.05$  ppm) or TMS ( $\delta = 0.00$  ppm) for  $^1\text{H}$  NMR; chloroform ( $\delta = 77.16$  ppm) or acetone ( $\delta = 29.84$  and  $206.26$  ppm) for  $^{13}\text{C}$  NMR; and  $\text{C}_6\text{F}_6$  ( $\delta = -164.9$  ppm) for  $^{19}\text{F}$  NMR. Mass spectra (MS) and high resolution mass spectra (HRMS) were recorded with an Agilent 5975C or JEOL AccuTOF-MS using an Electron impact (EI), Electrospray ionization (ESI), direct analysis in real-time (DART) techniques or field ionization (FI). Silica gel plate GF254 were used for thin layer chromatography (TLC) and silica gel H or 300-400 mesh were used for flash column chromatography. The starting materials cyclopropanes **1** and **3** were all prepared according to the literature reported procedures,<sup>[1]</sup> unless otherwise indicated.

## 2. Optimization of the Reaction Conditions

**Table S1** Optimization of nitrate-mediated ring expansion reaction of cyclopropane.<sup>a</sup>

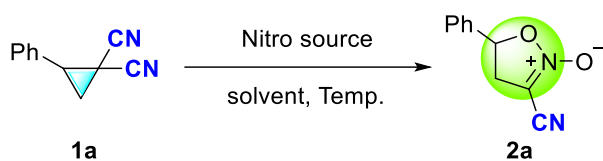

| Entry           | Nitro source (equiv)                                                                 | Solvent (mL)           | Temp (°C) | Yield (%) <sup>b</sup> |
|-----------------|--------------------------------------------------------------------------------------|------------------------|-----------|------------------------|
| 1               | Cu(NO <sub>3</sub> ) <sub>2</sub> ·3H <sub>2</sub> O (2.0)                           | DMSO (2)               | 70        | 75                     |
| 2               | Cu(NO <sub>3</sub> ) <sub>2</sub> ·3H <sub>2</sub> O (2.0)                           | DMF (2)                | 70        | 39                     |
| 3               | Cu(NO <sub>3</sub> ) <sub>2</sub> ·3H <sub>2</sub> O (2.0)                           | NMP (2)                | 70        | 45                     |
| 4               | Cu(NO <sub>3</sub> ) <sub>2</sub> ·3H <sub>2</sub> O (2.0)                           | PhCl (2)               | 70        | N.P.                   |
| 5               | Cu(NO <sub>3</sub> ) <sub>2</sub> ·3H <sub>2</sub> O (2.0)                           | toluene (2)            | 70        | N.P.                   |
| 6               | Cu(NO <sub>3</sub> ) <sub>2</sub> ·3H <sub>2</sub> O (2.0)                           | CH <sub>3</sub> CN (2) | 70        | N.P.                   |
| 7               | Cu(NO <sub>3</sub> ) <sub>2</sub> ·3H <sub>2</sub> O (2.0)                           | dioxane (2)            | 70        | N.P.                   |
| 8               | Co(NO <sub>3</sub> ) <sub>3</sub> ·3H <sub>2</sub> O (2.0)                           | DMSO (2)               | 70        | 71                     |
| 9               | KNO <sub>3</sub> (3.0)                                                               | DMSO (2)               | 70        | 23                     |
| 10              | Fe(NO <sub>3</sub> ) <sub>3</sub> ·3H <sub>2</sub> O (1.0)                           | DMSO (2)               | 70        | trace                  |
| 11              | Cu(NO <sub>3</sub> ) <sub>2</sub> ·3H <sub>2</sub> O (1.5)                           | DMSO (2)               | 70        | 77                     |
| 12              | Cu(NO <sub>3</sub> ) <sub>2</sub> ·3H <sub>2</sub> O (1.2)                           | DMSO (2)               | 70        | 80                     |
| 13              | Cu(NO <sub>3</sub> ) <sub>2</sub> ·3H <sub>2</sub> O (1.0)                           | DMSO (2)               | 70        | 77                     |
| 14              | Cu(NO <sub>3</sub> ) <sub>2</sub> ·3H <sub>2</sub> O (0.5)                           | DMSO (2)               | 70        | 31                     |
| <b>15</b>       | <b>Cu(NO<sub>3</sub>)<sub>2</sub>·3H<sub>2</sub>O (1.2)</b>                          | <b>DMSO (2)</b>        | <b>65</b> | <b>82</b>              |
| 16              | Cu(NO <sub>3</sub> ) <sub>2</sub> ·3H <sub>2</sub> O (1.2)                           | DMSO (2)               | 80        | 70                     |
| 17              | Cu(NO <sub>3</sub> ) <sub>2</sub> ·3H <sub>2</sub> O (1.2)                           | DMSO (1)               | 65        | 75                     |
| 18 <sup>c</sup> | Cu(NO <sub>3</sub> ) <sub>2</sub> ·3H <sub>2</sub> O (1.2)                           | DMSO (2)               | 65        | 75                     |
| 19              | Cu(NO <sub>3</sub> ) <sub>2</sub> ·3H <sub>2</sub> O (0.2)<br>KNO <sub>3</sub> (3.0) | DMSO (2)               | 65        | 44                     |

<sup>a</sup>Reaction conditions: **1a** (0.2 mmol, 1.0 equiv), nitro source (x equiv), solvent (y mL), temp, under N<sub>2</sub> for 15 h.

<sup>b</sup>Isolated yields. <sup>c</sup>Under air.

### 3. Unsuccessful Substrate Scope

We attempt to use other alternative cyclopropanes such as methyl 1-cyano-2-phenylcyclopropane-1-carboxylate (**1v**), methyl 4-(2,2-dicyanocyclopropyl)benzoate (**1w**), 2-(4-cyanophenyl)cyclopropane-1,1-dicarbonitrile (**1x**), 2-(4-nitrophenyl)cyclopropane-1,1-dicarbonitrile (**1y**), and 2-cyclohexylcyclopropane-1,1-dicarbonitrile (**1z**) to react with copper nitrate. Unfortunately, the desired products were not observed.

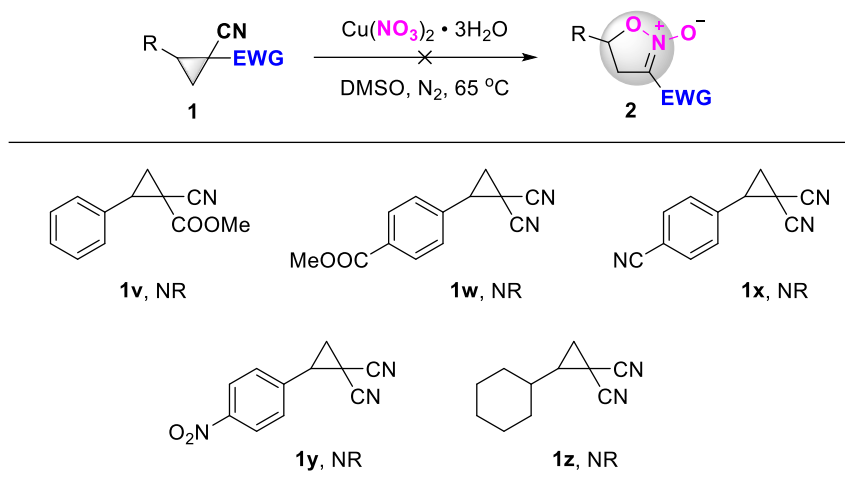

**Scheme S1** Substrate scope for the ring expansion reaction of cyclopropanes. Reaction conditions: **1** (0.2 mmol, 1.0 equiv),  $\text{Cu}(\text{NO}_3)_2 \cdot 3\text{H}_2\text{O}$  (1.2 equiv) in DMSO (2.0 mL) at  $65^\circ\text{C}$  under  $\text{N}_2$ .

### 4. Synthesis and Characterization of Substrates and Products

#### Part 1. Preparation of 1,1-dicyanocyclopropanes

Reported cyclopropanes **1** and **3** were prepared according to the literature procedures.<sup>[1]</sup> Cyclopropanes were purified by column chromatography on silica gel using petroleum ether/ethyl acetate as an eluent.

**A general procedure for the preparation of 1,1-dicyanocyclopropanes:** The cyclopropanes were prepared according to a literature procedure from the corresponding olefins.  $\text{PhI}(\text{OAc})_2$  (2.2 equiv),  $\text{K}_2\text{CO}_3$  (2.2 equiv), malononitrile (1.2 equiv) and olefins (1.0 equiv) were dissolved in DCE (2 M) in a 100 mL flask. The mixture was stirred at  $50^\circ\text{C}$  for 4 h as monitored by TLC. Then the reaction mixture was cooled to room temperature, poured into water and extracted with  $\text{CH}_2\text{Cl}_2$  ( $3 \times 20$  mL). The combined organic phase was washed with water and brine. The solvent was removed under reduced pressure, and the residue was purified by flash column chromatography on silica gel to afford the pure product.

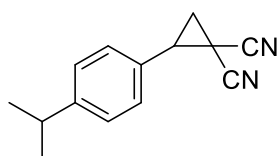

**2-(4-isopropylphenyl)cyclopropane-1,1-dicarbonitrile (1f):** This compound was prepared

according to the general procedure using 1-isopropyl-4-vinylbenzene (800 mg, 5.4 mmol). The crude residue was purified by silica gel chromatography (PE/EA = 10:1, v/v) to give **1f** as a yellow crystal (816,4 mg, 72%). mp: 108-109 °C; IR (KBr, cm<sup>-1</sup>): 3848, 3741, 3681, 3098, 3030, 2965, 2874, 2243, 1918, 1687, 1609, 1513, 1456, 1373, 1275, 1196, 1092, 1068, 986, 840, 765, 636, 586, 535; <sup>1</sup>H NMR (500 MHz, CDCl<sub>3</sub>) δ 7.30-7.26 (m, 2H), 7.23-7.20 (m, 2H), 3.27 (t, *J* = 9.1 Hz, 1H), 2.93 (hept, *J* = 6.9 Hz, 1H), 2.31-2.18 (m, 2H), 1.25 (d, *J* = 6.9 Hz, 6H).; <sup>13</sup>C NMR (126 MHz, CDCl<sub>3</sub>) δ 150.6, 128.4, 127.9, 127.4, 115.6, 113.3, 35.3, 34.0, 23.9, 22.6, 7.3.; HRMS (DART POSITIVE) *m/z* calcd for C<sub>14</sub>H<sub>15</sub>N<sub>2</sub> [M+H]<sup>+</sup> 211.1230, found 211.1229.

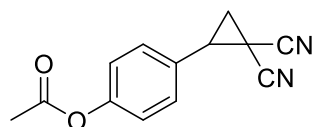

**4-(2,2-Dicyanocyclopropyl)phenyl acetate (1i):** This compound was prepared according to the general procedure using 4-vinylphenyl acetate (1.62 g, 10 mmol). The crude residue was purified by silica gel chromatography (PE/EA = 10:1, v/v) to give **1i** as a colorless crystal (1.36 g, 60%). mp: 117-118 °C; IR (KBr, cm<sup>-1</sup>): 3103, 3019, 2248, 1751, 1515, 1373, 1227, 1105, 1019, 914, 845, 630, 514; <sup>1</sup>H NMR (500 MHz, CDCl<sub>3</sub>) δ 7.35-7.29 (m, 2H), 7.21-7.14 (m, 2H), 3.29 (t, *J* = 9.0 Hz, 1H), 2.31 (s, 3H), 2.30-2.19 (m, 2H); <sup>13</sup>C NMR (126 MHz, CDCl<sub>3</sub>) δ 169.2, 151.6, 129.6, 128.2, 122.6, 115.3, 113.0, 34.7, 22.7, 21.3, 7.4; HRMS (DART POSITIVE) *m/z* calcd for C<sub>13</sub>H<sub>11</sub>N<sub>2</sub>O<sub>2</sub> [M+H]<sup>+</sup> 227.0815, found 227.0813.

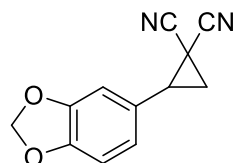

**2-(Benzo[d][1,3]dioxol-5-yl)cyclopropane-1,1-dicarbonitrile (1j):** This compound was prepared according to the general procedure using 5-vinylbenzo[d][1,3]dioxole (1.03 g, 7.0 mmol). The crude residue was purified by silica gel chromatography (PE/EA = 10:1, v/v) to give **1j** as a white solid (601.8 mg, 41%). mp: 95-96 °C; IR (KBr, cm<sup>-1</sup>): 3101, 3038, 2979, 2896, 2795, 2249, 1612, 1498, 1443, 1395, 1250, 1193, 1126, 1084, 1035, 981, 927, 827, 777, 737, 660, 596, 489; <sup>1</sup>H NMR (600 MHz, CDCl<sub>3</sub>) δ 6.83 (d, *J* = 8.4 Hz, 1H), 6.77 (d, *J* = 7.0 Hz, 2H), 6.00 (s, 2H), 3.24 (t, *J* = 9.0 Hz, 1H), 2.23-2.16 (m, 2H); <sup>13</sup>C NMR (150 MHz, CDCl<sub>3</sub>) δ 148.8, 148.4, 124.2, 122.4, 115.4, 113.2, 108.8, 108.6, 101.8, 35.4, 22.6, 7.3; HRMS (FI Positive) *m/z* calcd for C<sub>12</sub>H<sub>8</sub>N<sub>2</sub>O<sub>2</sub> [M]<sup>+</sup> 212.0580, found 212.0581.

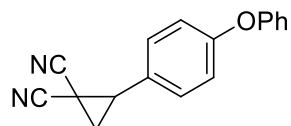

**2-(4-Phenoxyphenyl)cyclopropane-1,1-dicarbonitrile (1k):** This compound was prepared according to the general procedure using 1-phenoxy-4-vinylbenzene (981.2 mg, 5 mmol). The crude residue was purified by silica gel chromatography (PE/EA = 8:1, v/v) to give **1k** as a white solid (924.9 mg, 71%). mp: 101-102 °C; IR (KBr, cm<sup>-1</sup>): 3739, 3101, 3029, 2405, 2245, 2038, 1955, 1905, 1784, 1679, 1589, 1483, 1372, 1244, 1167, 1113, 1071, 983, 861, 760, 690, 627, 499; <sup>1</sup>H NMR (400 MHz, CDCl<sub>3</sub>) δ 7.39-7.34 (m, 2H), 7.27-7.22 (m, 2H), 7.16 (tt, *J* = 7.4, 1.1 Hz, 1H), 7.03 (td, *J* =

7.3, 6.8, 1.7 Hz, 4H), 3.28 (t,  $J = 9.0$  Hz, 1H), 2.23 (dq,  $J = 8.8, 6.4$  Hz, 2H);  $^{13}\text{C}$  NMR (151 MHz,  $\text{CDCl}_3$ )  $\delta$  159.0, 156.4, 130.3, 130.2, 125.0, 124.4, 119.9, 119.0, 115.6, 113.4, 35.1, 22.8, 7.5; HRMS (DART POSITIVE)  $m/z$  calcd for  $\text{C}_{17}\text{H}_{13}\text{N}_2\text{O}$   $[\text{M}+\text{H}]^+$  261.1022, found 261.1022.

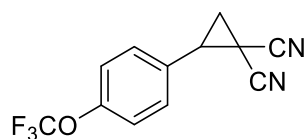

**2-(4-(trifluoromethoxy)phenyl)cyclopropane-1,1-dicarbonitrile (1q):** This compound was prepared according to the general procedure using 1-phenoxy-4-vinylbenzene (981.2 mg, 5 mmol). The crude residue was purified by silica gel chromatography (PE/EA = 8:1, v/v) to give **1q** as a yellow oil (770 mg, 46%). IR (KBr,  $\text{cm}^{-1}$ ): 3879, 3743, 3045, 2254, 1514, 1449, 1268, 1215, 1166, 1019, 987, 925, 854, 822, 674, 633, 513;  $^1\text{H}$  NMR (600 MHz,  $\text{CDCl}_3$ )  $\delta$  7.37-7.33 (m, 2H), 7.31-7.27 (m, 2H), 3.29 (t,  $J = 9.0$  Hz, 1H), 2.29 (dd,  $J = 9.4, 6.5$  Hz, 1H), 2.24 (dd,  $J = 8.7, 6.5$  Hz, 1H);  $^{13}\text{C}$  NMR (151 MHz,  $\text{CDCl}_3$ )  $\delta$  150.0, 130.0, 129.2, 121.5, 121.2, 114.9, 112.7, 34.2, 22.5, 7.3;  $^{19}\text{F}$  NMR (565 MHz,  $\text{CDCl}_3$ )  $\delta$  -57.8; HRMS (FI Positive Ion)  $m/z$  calcd for  $\text{C}_{12}\text{H}_7\text{N}_2\text{OF}_3$   $[\text{M}]^+$  252.0505, found 252.0499.

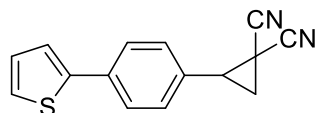

**2-(4-(thiophen-2-yl)phenyl)cyclopropane-1,1-dicarbonitrile (1s):** This compound was prepared according to the general procedure using 2-(4-vinylphenyl)thiophene (279.4 mg, 1.5 mmol). The crude residue was purified by silica gel chromatography (PE/EA = 10:1, v/v) to give **1s** as a white solid (83.5 mg, 23%). mp: 155-156 °C; IR (KBr,  $\text{cm}^{-1}$ ): 3984, 3859, 3739, 3506, 3434, 3104, 3033, 2921, 2250, 1617, 1506, 1427, 1263, 1208, 1132, 988, 834, 716, 636;  $^1\text{H}$  NMR (600 MHz,  $\text{CDCl}_3$ )  $\delta$  7.66 (d,  $J = 8.3$  Hz, 2H), 7.37-7.28 (m, 4H), 7.10 (dd,  $J = 5.1, 3.6$  Hz, 1H), 3.31 (t,  $J = 9.0$  Hz, 1H), 2.31-2.24 (m, 2H);  $^{13}\text{C}$  NMR (151 MHz,  $\text{CDCl}_3$ )  $\delta$  143.3, 135.9, 129.7, 129.2, 128.5, 126.8, 126.0, 124.2, 115.6, 113.3, 35.3, 22.7, 7.7; HRMS (FI Positive Ion)  $m/z$  calcd for  $\text{C}_{15}\text{H}_{10}\text{N}_2\text{S}$   $[\text{M}]^+$  250.0559, found 250.0558.

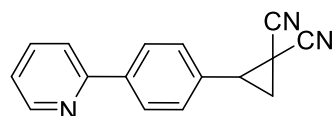

**2-(4-(pyridin-2-yl)phenyl)cyclopropane-1,1-dicarbonitrile (1t):** This compound was prepared according to the general procedure using 1-(pyridin-2-yl)-4-vinylbenzene (363.0 mg, 2.0 mmol). The crude residue was purified by silica gel chromatography (PE/EA = 10:1, v/v) to give **1t** as a white solid (278.5 mg, 57%). mp: 115-116 °C; IR (KBr,  $\text{cm}^{-1}$ ): 3952, 3743, 3677, 3103, 3044, 2244, 1697, 1584, 1516, 1465, 1433, 1374, 1279, 1095, 984, 852, 788, 738, 632, 596, 454;  $^1\text{H}$  NMR (400 MHz,  $\text{CDCl}_3$ )  $\delta$  8.70 (ddd,  $J = 4.8, 1.8, 1.0$  Hz, 1H), 8.10-8.03 (m, 2H), 7.82-7.70 (m, 2H), 7.44-7.37 (m, 2H), 7.30-7.23 (m, 1H), 3.35 (t,  $J = 9.1$  Hz, 1H), 2.30 (dq,  $J = 9.5, 6.5$  Hz, 2H);  $^{13}\text{C}$  NMR (100 MHz,  $\text{CDCl}_3$ )  $\delta$  156.3, 149.9, 140.6, 137.0, 131.2, 128.8, 127.7, 122.8, 120.8, 115.4, 113.0, 35.1, 22.5, 7.5; HRMS (ESI Positive)  $m/z$ : calcd for  $\text{C}_{16}\text{H}_{11}\text{N}_3$   $[\text{M}+\text{H}]^+$  246.1026, found 246.1023.

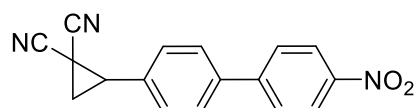

**3-(4'-Nitro-[1,1'-biphenyl]-4-yl)cyclopropane-1,1-dicarbonitrile (1u):** This compound was prepared according to the general procedure using 4-nitro-4'-vinyl-1,1'-biphenyl (360.0 mg, 1.6 mmol). The crude residue was purified by silica gel chromatography (PE/EA = 10:1, v/v) to give **1u** as a white solid (267.5 mg, 58%). mp: 105-106 °C; IR (KBr, cm<sup>-1</sup>): 3740, 3106, 2247, 1600, 1564, 1529, 1486, 1346, 1110, 984, 858, 831, 756, 733, 693, 633, 485; <sup>1</sup>H NMR (400 MHz, CDCl<sub>3</sub>) δ 8.34-8.27 (m, 2H), 7.77-7.70 (m, 2H), 7.69-7.66 (m, 2H), 3.36 (t, *J* = 9.1 Hz, 1H), 2.32 (d, *J* = 9.1 Hz, 2H); <sup>13</sup>C NMR (100 MHz, CDCl<sub>3</sub>) δ 147.5, 146.4, 140.0, 131.4, 129.3, 128.2, 128.0, 124.3, 115.2, 113.0, 34.8, 22.5, 7.5; HRMS (FI Positive) *m/z* calcd for C<sub>17</sub>H<sub>11</sub>O<sub>2</sub>N<sub>3</sub> [M]<sup>+</sup> 289.0846, found 289.0849.

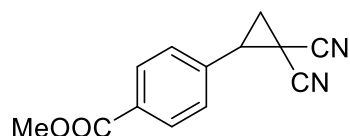

**methyl 4-(2,2-dicyanocyclopropyl)benzoate (1w):** This compound was prepared according to the general procedure using methyl 4-vinylbenzoate (396.0 mg, 6.0 mmol). The crude residue was purified by silica gel chromatography (PE/EA = 10:1, v/v) to give **1w** as a white solid (897.9 mg, 79%). mp: 67-68 °C; IR (KBr, cm<sup>-1</sup>): 3103, 3021, 2946, 2251, 1950, 1715, 1611, 1443, 1282, 1186, 1111, 979, 867, 789, 748, 632, 486; <sup>1</sup>H NMR (500 MHz, CDCl<sub>3</sub>) δ 8.13-8.07 (m, 2H), 7.43-7.34 (m, 2H), 3.93 (s, 3H), 3.34 (t, *J* = 9.0 Hz, 1H), 2.31 (d, *J* = 9.0 Hz, 2H), 1.57 (s, 2H); <sup>13</sup>C NMR (126 MHz, CDCl<sub>3</sub>) δ 166.3, 135.5, 131.5, 130.5, 128.6, 115.1, 112.8, 52.5, 34.7, 22.6, 7.6; HRMS (DART Positive) *m/z* calcd for C<sub>13</sub>H<sub>11</sub>O<sub>2</sub>N<sub>2</sub> [M]<sup>+</sup> 227.0815, found 227.0813.

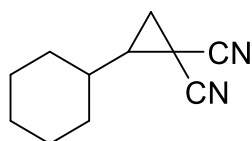

**2-cyclohexylcyclopropane-1,1-dicarbonitrile (1z):** This compound was prepared according to the general procedure using vinylcyclohexane (1.10 g, 10.0 mmol). The crude residue was purified by silica gel chromatography (PE/EA = 10:1, v/v) to give **1z** as a yellow oil (636.3 mg, 37%). <sup>1</sup>H NMR (500 MHz, CDCl<sub>3</sub>) δ 2.04-1.97 (m, 1H), 1.89 (dd, *J* = 9.0, 5.5 Hz, 1H), 1.83-1.74 (m, 4H), 1.72-1.65 (m, 1H), 1.53 (dd, *J* = 8.3, 5.6 Hz, 1H), 1.33 – 1.16 (m, 5H), 1.05 (tt, *J* = 10.4, 3.4 Hz, 1H); <sup>13</sup>C NMR (125 MHz, CDCl<sub>3</sub>) δ 115.8, 114.1, 39.9, 37.2, 31.9, 31.9, 25.9, 25.7, 25.5, 24.1, 3.3. Compound **1z** was consistent with the literature data.<sup>[1g]</sup>

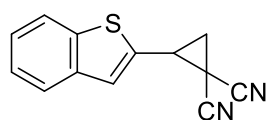

**2-(Benzo[b]thiophen-2-yl)cyclopropane-1,1-dicarbonitrile (3b):** This compound was prepared according to the general procedure using 2-vinylbenzo[b]thiophene (1.6 g, 10.0 mmol). The crude residue was purified by silica gel chromatography (PE/EA = 10:1, v/v) to give **3b** as a white solid (794.0 mg, 36%). mp: 125-126 °C; IR (KBr, cm<sup>-1</sup>): 3745, 3678, 3615, 3096, 3029, 2245, 1689, 1550, 1431, 1379, 1256, 1188, 1128, 1067, 1013, 940, 865, 758, 660, 628, 589, 485; <sup>1</sup>H NMR (600 MHz, CDCl<sub>3</sub>) δ 7.84-7.74 (m, 2H), 7.42-7.36 (m, 2H), 7.29 (s, 1H), 3.48 (t, *J* = 8.8 Hz, 1H), 2.35 (ddd, *J* = 24.8, 8.9, 6.4 Hz, 2H); <sup>13</sup>C NMR (150 MHz, CDCl<sub>3</sub>) δ 140.3, 139.3, 134.3, 125.9, 125.4, 125.2, 124.5, 122.7, 115.0, 112.9, 31.0, 24.1, 8.7; HRMS (FI Positive) *m/z* calcd for C<sub>13</sub>H<sub>8</sub>N<sub>2</sub>S [M]<sup>+</sup> 224.0403, found 224.0398.

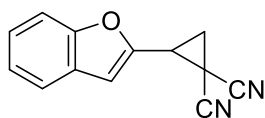

**2-(Benzofuran-2-yl)cyclopropane-1,1-dicarbonitrile (3c):** This compound was prepared according to the general procedure using 2-vinylbenzofuran (1.16 g, 8.0 mmol). The crude residue was purified by silica gel chromatography (PE/EA = 10:1, v/v) to give **3c** as a white solid (516.0 mg, 31%). mp: 97-98 °C; IR (KBr,  $\text{cm}^{-1}$ ): 3887, 3735, 3108, 3025, 2245, 1446, 1391, 1308, 1258, 1172, 1097, 989, 926, 870, 811, 749, 703, 629, 594;  $^1\text{H}$  NMR (600 MHz,  $\text{CDCl}_3$ )  $\delta$  7.57 (dt,  $J = 7.6, 1.1$  Hz, 1H), 7.47 (dq,  $J = 8.3, 0.9$  Hz, 1H), 7.33 (ddd,  $J = 8.4, 7.2, 1.3$  Hz, 1H), 7.28-7.23 (m, 1H), 6.82 (d,  $J = 0.9$  Hz, 1H), 3.38 (ddd,  $J = 9.4, 8.4, 0.7$  Hz, 1H), 2.44 (dd,  $J = 8.4, 6.4$  Hz, 1H), 2.30 (dd,  $J = 9.5, 6.4$  Hz, 1H);  $^{13}\text{C}$  NMR (150 MHz,  $\text{CDCl}_3$ )  $\delta$  155.2, 147.3, 127.5, 125.6, 123.6, 121.5, 114.5, 112.6, 111.5, 107.9, 28.8, 21.8, 7.3; HRMS (FI Positive)  $m/z$  calcd for  $\text{C}_{13}\text{H}_8\text{ON}_2$   $[\text{M}]^+$  208.0631, found 208.0626.

## Part 2. Ring Expansion Reactions of Cyclopropanes

**General Procedure (Method A):** To a test tube were added 2-arylcyclopropane-1,1-dicarbonitrile (0.2 mmol),  $\text{Cu}(\text{NO}_3)_2 \cdot 3\text{H}_2\text{O}$  (0.2-0.24 mmol), DMSO (2.0 mL). The reaction mixture was stirred at 60-70 °C for 15-36 h under  $\text{N}_2$  as monitored by TLC. Upon completion, the reaction mixture was cooled down to room temperature, extracted with DCM ( $3 \times 10$  mL). The combined organic phase was washed with water and brine, and dried over anhydrous  $\text{Na}_2\text{SO}_4$ , then evaporated under reduced pressure to give the crude product, which was further purified by column chromatography on silica gel to afford the pure product.

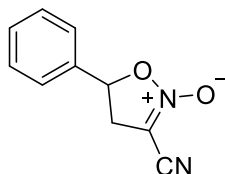

**3-Cyano-5-phenyl-4,5-dihydroisoxazole 2-oxide (2a):** This compound was prepared according to *Method A* using 2-phenylcyclopropane-1,1-dicarbonitrile (0.2 mmol) and  $\text{Cu}(\text{NO}_3)_2 \cdot 3\text{H}_2\text{O}$  (0.24 mmol) at 65 °C for 15 h. The crude residue was purified by silica gel chromatography (PE/EA = 10:1, v/v) to give **2a** as a white solid (30.7 mg, 82%). mp: 93-94 °C; IR (KBr,  $\text{cm}^{-1}$ ): 2222, 1601, 1494, 1459, 1360, 1286, 1261, 1228, 1210, 1156, 941, 878, 818, 763, 699, 626, 538, 483, 433;  $^1\text{H}$  NMR (500 MHz,  $\text{CDCl}_3$ )  $\delta$  7.38-7.48 (m, 5H), 5.93 (t,  $J = 8.9$  Hz, 1H), 3.74 (dd,  $J = 16.3, 9.5$  Hz, 1H), 3.43 (dd,  $J = 16.3, 8.3$  Hz, 1H);  $^{13}\text{C}$  NMR (125 MHz,  $\text{CDCl}_3$ )  $\delta$  136.1, 130.1, 129.5, 126.0, 109.8, 92.8, 80.3, 37.4; HRMS (DART Positive)  $m/z$ : calcd for  $\text{C}_{10}\text{H}_9\text{N}_2\text{O}_2$   $[\text{M}+\text{H}]^+$  189.0659, found 189.0657. Compound **2a** was consistent with the literature data.<sup>[2]</sup>

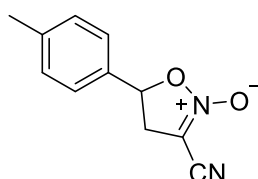

**3-Cyano-5-(p-tolyl)-4,5-dihydroisoxazole 2-oxide (2b):** This compound was prepared according to *Method A* using 2-(p-tolyl)cyclopropane-1,1-dicarbonitrile (0.2 mmol) and  $\text{Cu}(\text{NO}_3)_2 \cdot 3\text{H}_2\text{O}$



(0.24 mmol) at 65 °C for 15 h. The crude residue was purified by silica gel chromatography (PE/EA = 10:1, v/v) to give **2b** as a yellow oil (34.1 mg, 84%). IR (KBr,  $\text{cm}^{-1}$ ): 3440, 2922, 2859, 2220, 1606, 1448, 1367, 1257, 1219, 1154, 1104, 1034, 941, 877, 818, 733, 628, 535;  $^1\text{H}$  NMR (600 MHz,  $\text{CDCl}_3$ )  $\delta$  7.27 (q,  $J = 8.0$  Hz, 4H), 5.85 (t,  $J = 9.0$  Hz, 1H), 3.65 (dd,  $J = 16.3, 9.5$  Hz, 1H), 3.38 (dd,  $J = 16.3, 8.6$  Hz, 1H), 2.38 (s, 3H);  $^{13}\text{C}$  NMR (100 MHz,  $\text{CDCl}_3$ )  $\delta$  140.2, 132.8, 130.1, 126.2, 109.9, 93.1, 80.6, 37.2, 21.4; HRMS (DART Positive)  $m/z$ : calcd for  $\text{C}_{11}\text{H}_{11}\text{N}_2\text{O}_2$   $[\text{M}+\text{H}]^+$  203.0815, found 203.0813. Compound **2b** was consistent with the literature data.<sup>[2]</sup>

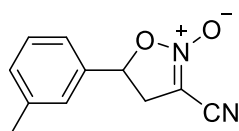

**3-Cyano-5-(*m*-tolyl)-4,5-dihydroisoxazole 2-oxide (2c):** This compound was prepared according to *Method A* using 2-(*m*-tolyl)cyclopropane-1,1-dicarbonitrile (0.2 mmol) and  $\text{Cu}(\text{NO}_3)_2 \cdot 3\text{H}_2\text{O}$  (0.24 mmol) at 65 °C for 15 h. The crude residue was purified by silica gel chromatography (PE/EA = 10:1, v/v) to give **2c** as a yellow oil (35.1 mg, 87%). IR (KBr,  $\text{cm}^{-1}$ ): 3851, 3739, 2923, 2221, 1618, 1456, 1368, 1260, 1168, 1041, 906, 847, 789, 704, 629;  $^1\text{H}$  NMR (400 MHz,  $\text{CDCl}_3$ )  $\delta$  7.33 (t,  $J = 7.6$  Hz, 1H), 7.25-7.14 (m, 3H), 5.85 (t,  $J = 8.9$  Hz, 1H), 3.68 (dd,  $J = 16.3, 9.5$  Hz, 1H), 3.38 (dd,  $J = 16.3, 8.4$  Hz, 1H), 2.39 (s, 3H);  $^{13}\text{C}$  NMR (150 MHz,  $\text{CDCl}_3$ )  $\delta$  139.6, 136.2, 131.0, 129.5, 126.8, 123.3, 110.0, 93.2, 80.6, 37.5, 21.7; HRMS (DART Positive)  $m/z$ : calcd for  $\text{C}_{11}\text{H}_{11}\text{N}_2\text{O}_2$   $[\text{M}+\text{H}]^+$  203.0815, found 203.0815.

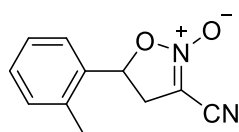

**3-Cyano-5-(*o*-tolyl)-4,5-dihydroisoxazole 2-oxide (2d):** This compound was prepared according to *Method A* using 2-(*o*-tolyl)cyclopropane-1,1-dicarbonitrile (0.2 mmol) and  $\text{Cu}(\text{NO}_3)_2 \cdot 3\text{H}_2\text{O}$  (0.24 mmol) at 65 °C for 15 h. The crude residue was purified by silica gel chromatography (PE/EA = 10:1, v/v) to give **2d** as a yellow oil (37.6 mg, 93%). IR (KBr,  $\text{cm}^{-1}$ ): 3904, 3738, 2948, 2221, 1618, 1458, 1372, 1257, 1170, 1040, 882, 824, 761, 627;  $^1\text{H}$  NMR (400 MHz,  $\text{CDCl}_3$ )  $\delta$  7.47-7.40 (m, 1H), 7.37-7.21 (m, 3H), 6.10 (dd,  $J = 9.6, 8.1$  Hz, 1H), 3.72 (dd,  $J = 16.2, 9.7$  Hz, 1H), 3.30 (dd,  $J = 16.2, 8.1$  Hz, 1H), 2.35 (s, 3H);  $^{13}\text{C}$  NMR (150 MHz,  $\text{CDCl}_3$ )  $\delta$  134.9, 134.3, 131.5, 129.7, 127.1, 125.0, 109.8, 92.8, 77.8, 36.5, 19.1; HRMS (DART Positive)  $m/z$ : calcd for  $\text{C}_{11}\text{H}_{11}\text{N}_2\text{O}_2$   $[\text{M}+\text{H}]^+$  203.0815, found 203.0815.

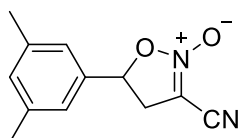

**3-Cyano-5-(3,5-dimethylphenyl)-4,5-dihydroisoxazole 2-oxide (2e):** This compound was prepared according to *Method A* using 2-(3,5-dimethylphenyl)cyclopropane-1,1-dicarbonitrile (0.2 mmol) and  $\text{Cu}(\text{NO}_3)_2 \cdot 3\text{H}_2\text{O}$  (0.24 mmol) at 65 °C for 15 h. The crude residue was purified by silica gel chromatography (PE/EA = 10:1, v/v) to give **2e** as a yellow oil (28.9 mg, 67%). IR (KBr,  $\text{cm}^{-1}$ ): 3853, 3741, 2922, 2220, 1617, 1462, 1368, 1259, 1170, 1036, 909, 845, 700, 631;  $^1\text{H}$  NMR (600 MHz,  $\text{CDCl}_3$ )  $\delta$  7.06 (s, 1H), 6.99 (s, 2H), 5.81 (t,  $J = 9.0$  Hz, 1H), 3.66 (dd,  $J = 16.3, 9.6$  Hz, 1H),

3.37 (dd,  $J = 16.3, 8.3$  Hz, 1H), 2.35 (s, 6H);  $^{13}\text{C}$  NMR (150 MHz,  $\text{CDCl}_3$ )  $\delta$  139.3, 136.0, 131.6, 123.7, 109.9, 93.0, 80.5, 37.3, 21.4; HRMS (FI Positive)  $m/z$ : calcd for  $\text{C}_{12}\text{H}_{12}\text{N}_2\text{O}_2$   $[\text{M}]^+$  216.0893, found 216.0897.

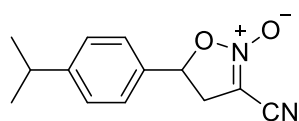

**3-Cyano-5-(4-isopropylphenyl)-4,5-dihydroisoxazole 2-oxide (2f):** This compound was prepared according to *Method A* using 2-(4-isopropylphenyl)cyclopropane-1,1-dicarbonitrile (0.2 mmol) and  $\text{Cu}(\text{NO}_3)_2 \cdot 3\text{H}_2\text{O}$  (0.24 mmol) at 65 °C for 15 h. The crude residue was purified by silica gel chromatography (PE/EA = 10:1, v/v) to give **2f** as a yellow oil (37.4 mg, 81%). IR (KBr,  $\text{cm}^{-1}$ ): 2962, 2876, 2221, 1612, 1512, 1456, 1370, 1264, 1220, 1153, 1053, 879, 829, 730, 631, 561;  $^1\text{H}$  NMR (400 MHz,  $\text{CDCl}_3$ )  $\delta$  7.32 (m, 4H), 5.86 (dd,  $J = 9.4, 8.5$  Hz, 1H), 3.66 (dd,  $J = 16.3, 9.4$  Hz, 1H), 3.40 (dd,  $J = 16.3, 8.5$  Hz, 1H), 2.94 (hept,  $J = 6.9$  Hz, 1H), 1.26 (d,  $J = 6.9$  Hz, 6H);  $^{13}\text{C}$  NMR (125 MHz,  $\text{CDCl}_3$ ) 151.2, 133.2, 127.5, 126.3, 109.9, 93.1, 80.5, 37.2, 34.1, 24.0; HRMS (DART Positive)  $m/z$ : calcd for  $\text{C}_{13}\text{H}_{15}\text{N}_2\text{O}_2$   $[\text{M}+\text{H}]^+$  231.1128, found 231.1128.

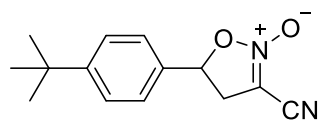

**5-(4-(*tert*-Butyl)phenyl)-3-cyano-4,5-dihydroisoxazole 2-oxide (2g):** This compound was prepared according to *Method A* using 2-(4-(*tert*-butyl)phenyl)cyclopropane-1,1-dicarbonitrile (0.2 mmol) and  $\text{Cu}(\text{NO}_3)_2 \cdot 3\text{H}_2\text{O}$  (0.24 mmol) at 65 °C for 15 h. The crude residue was purified by silica gel chromatography (PE/EA = 10:1, v/v) to give product **2g** as a white solid (37.4 mg, 69%). mp: 84–85 °C; IR (KBr,  $\text{cm}^{-1}$ ): 2963, 2221, 1612, 1369, 1265, 1221, 1113, 1026, 881, 834, 762, 628, 569;  $^1\text{H}$  NMR (500 MHz,  $\text{CDCl}_3$ )  $\delta$  7.47 (d,  $J = 8.5$  Hz, 2H), 7.33 (d,  $J = 8.4$  Hz, 2H), 5.87 (t,  $J = 8.9$  Hz, 1H), 3.66 (dd,  $J = 16.2, 9.4$  Hz, 1H), 3.40 (dd,  $J = 16.2, 8.4$  Hz, 1H), 1.33 (s, 9H);  $^{13}\text{C}$  NMR (125 MHz,  $\text{CDCl}_3$ )  $\delta$  153.5, 132.9, 126.4, 126.0, 109.9, 93.0, 80.4, 37.2, 34.9, 31.3; HRMS (DART Positive)  $m/z$ : calcd for  $\text{C}_{14}\text{H}_{17}\text{N}_2\text{O}_2$   $[\text{M}+\text{H}]^+$  245.1285, found 245.1282.

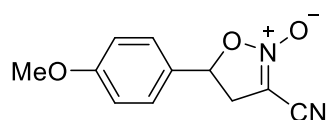

**3-Cyano-5-(4-methoxyphenyl)-4,5-dihydroisoxazole 2-oxide (2h):** This compound was prepared according to *Method A* using 2-(4-methoxyphenyl)cyclopropane-1,1-dicarbonitrile (0.2 mmol) and  $\text{Cu}(\text{NO}_3)_2 \cdot 3\text{H}_2\text{O}$  (0.24 mmol) at 60 °C for 15 h. The crude residue was purified by silica gel chromatography (PE/EA = 10:1, v/v) to give **2h** as a yellow oil (32.6 mg, 75%). IR (KBr,  $\text{cm}^{-1}$ ): 3612, 3538, 2951, 2845, 2221, 1615, 1514, 1456, 1300, 1255, 1179, 1029, 945, 876, 828, 629, 551;  $^1\text{H}$  NMR (500 MHz,  $\text{CDCl}_3$ )  $\delta$  7.37–7.29 (m, 2H), 7.00–6.89 (m, 2H), 5.83 (t,  $J = 9.1$  Hz, 1H), 3.83 (s, 3H), 3.62 (dd,  $J = 16.3, 9.4$  Hz, 1H), 3.39 (dd,  $J = 16.3, 8.9$  Hz, 1H);  $^{13}\text{C}$  NMR (125 MHz,  $\text{CDCl}_3$ )  $\delta$  161.0, 128.1, 127.4, 114.7, 109.9, 93.3, 80.7, 55.5, 37.0; HRMS (DART Positive)  $m/z$ : calcd for  $\text{C}_{11}\text{H}_{11}\text{N}_2\text{O}_3$   $[\text{M}+\text{H}]^+$  219.0764, found 219.0764.

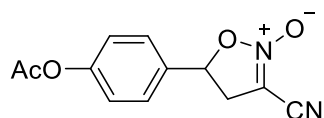

**5-(4-Acetoxyphenyl)-3-cyano-4,5-dihydroisoxazole 2-oxide (2i):** This compound was prepared according to *Method A* using 2-(4-acetoxyphenyl)cyclopropane-1,1-dicarbonitrile (0.2 mmol) and  $\text{Cu}(\text{NO}_3)_2 \cdot 3\text{H}_2\text{O}$  (0.24 mmol) at 65 °C for 15 h. The crude residue was purified by silica gel chromatography (PE/EA = 10:1, v/v) to give **2i** as a yellow oil (34.4 mg, 70%). IR (KBr,  $\text{cm}^{-1}$ ): 3991, 3826, 3745, 3614, 2940, 2222, 1761, 1618, 1509, 1432, 1369, 1203, 1015, 882, 606, 546;  $^1\text{H}$  NMR (500 MHz,  $\text{CDCl}_3$ )  $\delta$  7.44-7.37 (m, 2H), 7.22-7.13 (m, 2H), 5.88 (t,  $J = 8.9$  Hz, 1H), 3.68 (dd,  $J = 16.3, 9.5$  Hz, 1H), 3.36 (dd,  $J = 16.3, 8.3$  Hz, 1H), 2.32 (s, 3H);  $^{13}\text{C}$  NMR (125 MHz,  $\text{CDCl}_3$ )  $\delta$  169.6, 152.0, 133.7, 127.6, 123.0, 109.9, 93.0, 79.9, 37.5, 21.4; HRMS (FI Positive)  $m/z$ : calcd for  $\text{C}_{12}\text{H}_{10}\text{O}_4\text{N}_2$   $[\text{M}]^+$  246.0635, found 246.0637.

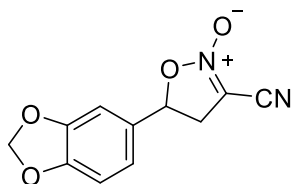

**5-(Benzo[d][1,3]dioxol-5-yl)-3-cyano-4,5-dihydroisoxazole 2-oxide (2j):** This compound was prepared according to *Method A* using 2-(benzo[d][1,3]dioxol-5-yl)cyclopropane-1,1-dicarbonitrile (0.2 mmol) and  $\text{Cu}(\text{NO}_3)_2 \cdot 3\text{H}_2\text{O}$  (0.24 mmol) at 65 °C for 30 h. The crude residue was purified by silica gel chromatography (PE/EA = 10:1, v/v) to give **2j** as a yellow oil (42.8 mg, 92%). IR (KBr,  $\text{cm}^{-1}$ ): 2906, 2222, 1616, 1500, 1374, 1336, 1252, 1109, 1038, 922, 859, 812;  $^1\text{H}$  NMR (400 MHz,  $\text{CDCl}_3$ )  $\delta$  6.89-6.80 (m, 3H), 6.02 (s, 2H), 5.79 (t,  $J = 9.1$  Hz, 1H), 3.63 (dd,  $J = 16.4, 9.4$  Hz, 1H), 3.36 (dd,  $J = 16.4, 8.7$  Hz, 1H);  $^{13}\text{C}$  NMR (150 MHz,  $\text{CDCl}_3$ )  $\delta$  149.4, 148.9, 129.5, 120.9, 110.0, 109.0, 106.6, 102.0, 93.3, 80.8, 37.4; HRMS (FI Positive)  $m/z$ : calcd for  $\text{C}_{11}\text{H}_8\text{N}_2\text{O}_4$   $[\text{M}]^+$  232.0479, found 232.0482.

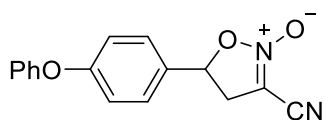

**3-Cyano-5-(4-phenoxyphenyl)-4,5-dihydroisoxazole 2-oxide (2k):** This compound was prepared according to *Method A* using 2-(4-phenoxyphenyl)cyclopropane-1,1-dicarbonitrile (0.2 mmol) and  $\text{Cu}(\text{NO}_3)_2 \cdot 3\text{H}_2\text{O}$  (0.24 mmol) at 65 °C for 23 h. The crude residue was purified by silica gel chromatography (PE/EA = 10:1, v/v) to give **2k** as a white solid (46.1 mg, 82%). mp: 151-152 °C; IR (KBr,  $\text{cm}^{-1}$ ): 3898, 3740, 2859, 2221, 1602, 1500, 1365, 1256, 1160, 1109, 943, 880, 831, 755, 693, 632, 536, 484;  $^1\text{H}$  NMR (600 MHz,  $\text{CDCl}_3$ )  $\delta$  7.39-7.33 (m, 4H), 7.17 (t,  $J = 7.4$  Hz, 1H), 7.05 (t,  $J = 8.4$  Hz, 4H), 5.87 (t,  $J = 9.0$  Hz, 1H), 3.67 (dd,  $J = 16.3, 9.4$  Hz, 1H), 3.41 (dd,  $J = 16.3, 8.6$  Hz, 1H);  $^{13}\text{C}$  NMR (150 MHz,  $\text{CDCl}_3$ )  $\delta$  159.2, 156.3, 130.1, 129.9, 128.0, 124.3, 119.7, 119.0, 109.1, 93.0, 80.2, 37.2; HRMS (FI Positive)  $m/z$ : calcd for  $\text{C}_{16}\text{H}_{12}\text{N}_2\text{O}_3$   $[\text{M}]^+$  280.0842, found 280.0847.

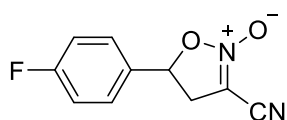

**3-Cyano-5-(4-fluorophenyl)-4,5-dihydroisoxazole 2-oxide (2l):** This compound was prepared according to *Method A* using 2-(4-fluorophenyl)cyclopropane-1,1-dicarbonitrile (0.2 mmol) and  $\text{Cu}(\text{NO}_3)_2 \cdot 3\text{H}_2\text{O}$  (0.24 mmol) at 65 °C for 23 h. The crude residue was purified by silica gel chromatography (PE/EA = 10:1, v/v) to give **2l** as a yellow oil (32.1 mg, 78%). IR (KBr,  $\text{cm}^{-1}$ ):

3848, 3744, 2935, 2222, 1617, 1513, 1456, 1368, 1232, 1160, 882, 836, 627, 548;  $^1\text{H}$  NMR (400 MHz,  $\text{CDCl}_3$ )  $\delta$  7.44-7.36 (m, 2H), 7.18-7.11 (m, 2H), 5.88 (t,  $J = 9.0$  Hz, 1H), 3.69 (dd,  $J = 16.3$ , 9.5 Hz, 1H), 3.37 (dd,  $J = 16.3$ , 8.5 Hz, 1H);  $^{19}\text{F}$  NMR (471 MHz,  $\text{CDCl}_3$ )  $\delta$  -110.5 (tt, F);  $^{13}\text{C}$  NMR (125 MHz,  $\text{CDCl}_3$ )  $\delta$  163.6 (d,  $^1J_{\text{C-F}} = 250.1$  Hz), 131.8 (d,  $^4J_{\text{C-F}} = 3.5$  Hz), 128.2 (d,  $^3J_{\text{C-F}} = 8.6$  Hz), 116.6 (d,  $^2J_{\text{C-F}} = 22.0$  Hz), 109.7, 92.9, 79.7, 37.3; HRMS (DART Positive)  $m/z$ : calcd for  $\text{C}_{10}\text{H}_8\text{N}_2\text{O}_2\text{F}$   $[\text{M}+\text{H}]^+$  207.0564, found 207.0564.

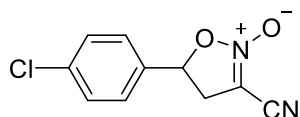

**5-(4-Chlorophenyl)-3-cyano-4,5-dihydroisoxazole 2-oxide (2m):** This compound was prepared according to *Method A* using 2-(4-chlorophenyl)cyclopropane-1,1-dicarbonitrile (0.2 mmol) and  $\text{Cu}(\text{NO}_3)_2 \cdot 3\text{H}_2\text{O}$  (0.24 mmol) at 65 °C for 23 h. The crude residue was purified by silica gel chromatography (PE/EA = 10:1, v/v) to give **2m** as a yellow oil (40.2 mg, 90%). IR (KBr,  $\text{cm}^{-1}$ ): 3744, 2923, 2858, 2224, 1916, 1609, 1490, 1428, 1367, 1254, 1152, 1091, 1011, 938, 880, 828, 611, 535, 443;  $^1\text{H}$  NMR (600 MHz,  $\text{CDCl}_3$ )  $\delta$  7.43 (d,  $J = 8.5$  Hz, 2H), 7.34 (d,  $J = 8.3$  Hz, 2H), 5.87 (t,  $J = 8.9$  Hz, 1H), 3.71 (dd,  $J = 16.3$ , 9.5 Hz, 1H), 3.35 (dd,  $J = 16.3$ , 8.3 Hz, 1H);  $^{13}\text{C}$  NMR (150 MHz,  $\text{CDCl}_3$ )  $\delta$  136.3, 134.7, 129.9, 127.6, 109.8, 92.9, 79.7, 37.5; HRMS (FI Positive)  $m/z$ : calcd for  $\text{C}_{10}\text{H}_7\text{ClN}_2\text{O}_2$   $[\text{M}]^+$  222.0191, found 222.0187.

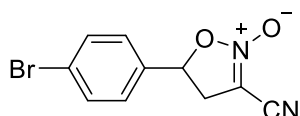

**5-(4-Bromophenyl)-3-cyano-4,5-dihydroisoxazole 2-oxide (2n):** This compound was prepared according to *Method A* using 2-(4-bromophenyl)cyclopropane-1,1-dicarbonitrile (0.2 mmol) and  $\text{Cu}(\text{NO}_3)_2 \cdot 3\text{H}_2\text{O}$  (0.24 mmol) at 65 °C for 24 h. The crude residue was purified by silica gel chromatography (PE/EA = 10:1, v/v) to give **2n** as a yellow oil (34.8 mg, 65%). IR (KBr,  $\text{cm}^{-1}$ ): 2922, 2858, 2222, 1916, 1609, 1484, 1367, 1256, 1150, 1072, 1010, 879, 821, 604, 531, 481;  $^1\text{H}$  NMR (400 MHz,  $\text{CDCl}_3$ )  $\delta$  7.60 (d,  $J = 8.3$  Hz, 2H), 7.28 (d,  $J = 8.4$  Hz, 2H), 5.86 (t,  $J = 8.9$  Hz, 1H), 3.71 (dd,  $J = 16.3$ , 9.5 Hz, 1H), 3.34 (dd,  $J = 16.3$ , 8.2 Hz, 1H);  $^{13}\text{C}$  NMR (125 MHz,  $\text{CDCl}_3$ )  $\delta$  135.2, 132.9, 127.9, 124.4, 109.8, 92.9, 79.7, 37.4; HRMS (DART Positive)  $m/z$ : calcd for  $\text{C}_{10}\text{H}_8\text{N}_2\text{O}_2\text{Br}$   $[\text{M}+\text{H}]^+$  266.9764, found 266.9763.

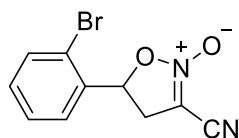

**5-(2-Bromophenyl)-3-cyano-4,5-dihydroisoxazole 2-oxide (2o):** This compound was prepared according to *Method A* using 2-(2-bromophenyl)cyclopropane-1,1-dicarbonitrile (0.2 mmol) and  $\text{Cu}(\text{NO}_3)_2 \cdot 3\text{H}_2\text{O}$  (0.24 mmol) at 65 °C for 24 h. The crude residue was purified by silica gel chromatography (PE/EA = 10:1, v/v) to give **2o** as a yellow oil (27.8 mg, 52%). IR (KBr,  $\text{cm}^{-1}$ ): 3859, 3741, 3677, 3648, 3619, 2924, 2222, 1623, 1469, 1439, 1373, 1237, 1160, 1028, 889, 758, 623, 484, 456;  $^1\text{H}$  NMR (400 MHz,  $\text{CDCl}_3$ )  $\delta$  7.63 (dt,  $J = 7.9$ , 0.9 Hz, 1H), 7.51 (dd,  $J = 7.7$ , 1.7 Hz, 1H), 7.43 (td,  $J = 7.7$ , 1.1 Hz, 1H), 7.30 (td,  $J = 7.7$ , 1.8 Hz, 1H), 6.15 (dd,  $J = 9.9$ , 6.2 Hz, 1H), 3.95 (dd,  $J = 16.5$ , 9.9 Hz, 1H), 3.21 (dd,  $J = 16.5$ , 6.2 Hz, 1H);  $^{13}\text{C}$  NMR (125 MHz,  $\text{CDCl}_3$ )  $\delta$  136.4, 133.7, 131.0, 128.4, 126.2, 120.5, 109.5, 92.5, 78.5, 37.0; HRMS (DART Positive)  $m/z$ : calcd

for  $C_{10}H_8N_2O_2Br$   $[M+H]^+$  266.9764, found 266.9764.

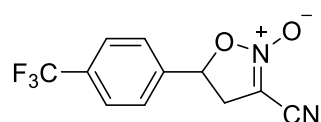

**3-Cyano-5-(4-(trifluoromethyl)phenyl)-4,5-dihydroisoxazole 2-oxide (2p):** This compound was prepared according to *Method A* using 2-(4-(trifluoromethyl)phenyl)cyclopropane-1,1-dicarbonitrile (0.2 mmol) and  $Cu(NO_3)_2 \cdot 3H_2O$  (0.24 mmol) at 65 °C for 24 h. The crude residue was purified by silica gel chromatography (PE/EA = 10:1, v/v) to give **2p** as a yellow oil (43.9 mg, 86%). IR (KBr,  $cm^{-1}$ ): 3739, 3677, 2224, 1623, 1424, 1375, 1327, 1261, 1169, 1122, 1068, 1018, 886, 843, 616;  $^1H$  NMR (400 MHz,  $CDCl_3$ )  $\delta$  7.74 (d,  $J = 8.1$  Hz, 2H), 7.53 (d,  $J = 8.1$  Hz, 2H), 5.96 (dd,  $J = 9.6, 7.9$  Hz, 1H), 3.79 (dd,  $J = 16.3, 9.6$  Hz, 1H), 3.35 (dd,  $J = 16.3, 7.9$  Hz, 1H);  $^{19}F$  NMR (375 MHz,  $CDCl_3$ )  $\delta$  -62.8 (s,  $CF_3$ );  $^{13}C$  NMR (100 MHz,  $CDCl_3$ )  $\delta$  140.2, 132.1 (q,  $^2J_{C-F} = 32.9$  Hz), 126.2 (q,  $^3J_{C-F} = 3.8$  Hz), 126.2, 123.7 (q,  $^1J_{C-F} = 272.3$  Hz), 109.4, 92.3, 78.9, 37.4; HRMS (DART Positive) m/z: calcd for  $C_{11}H_8N_2O_2F_3$   $[M+H]^+$  257.0532, found 257.0533.

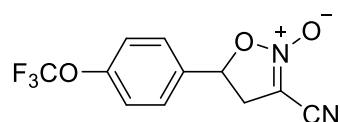

**3-Cyano-5-(4-(trifluoromethoxy)phenyl)-4,5-dihydroisoxazole 2-oxide (2q):** This compound was prepared according to *Method A* using 2-(4-(trifluoromethoxy)phenyl)cyclopropane-1,1-dicarbonitrile (0.2 mmol) and  $Cu(NO_3)_2 \cdot 3H_2O$  (0.24 mmol) at 65 °C for 20 h. The crude residue was purified by silica gel chromatography (PE/EA = 10:1, v/v) to give **2q** as a yellow oil (30.9 mg, 56%). IR (KBr,  $cm^{-1}$ ): 3734, 2224, 1621, 1513, 1454, 1374, 1262, 1223, 1167, 1019, 883, 677, 608, 550;  $^1H$  NMR (600 MHz,  $CDCl_3$ )  $\delta$  7.47-7.42 (m, 2H), 7.38-7.25 (m, 2H), 5.91 (t,  $J = 8.8$  Hz, 1H), 3.73 (dd,  $J = 16.3, 9.5$  Hz, 1H), 3.36 (dd,  $J = 16.3, 8.2$  Hz, 1H);  $^{19}F$  NMR (565 MHz,  $CDCl_3$ )  $\delta$  -57.9 (s,  $CF_3$ );  $^{13}C$  NMR (150 MHz,  $CDCl_3$ )  $\delta$  150.2, 134.6, 127.59, 121.8, 120.4 (q,  $^1J_{C-F} = 258.2$  Hz), 109.5, 92.5, 79.1, 37.2; HRMS (FI Positive) m/z: calcd for  $C_{11}H_7O_3N_2F_3$   $[M]^+$  272.0403, found 272.0402.

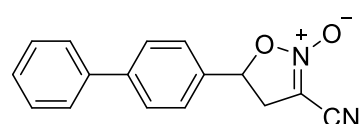

**5-([1,1'-Biphenyl]-4-yl)-3-cyano-4,5-dihydroisoxazole 2-oxide (2r):** This compound was prepared according to *Method A* using 2-([1,1'-biphenyl]-4-yl)cyclopropane-1,1-dicarbonitrile (0.2 mmol) and  $Cu(NO_3)_2 \cdot 3H_2O$  (0.24 mmol) at 65 °C for 20 h. The crude residue was purified by silica gel chromatography (PE/EA = 10:1, v/v) to give **2r** as a yellow solid (28.3 mg, 54%). mp: 176-177 °C. IR (KBr,  $cm^{-1}$ ): 3847, 3743, 3577, 2923, 2220, 1688, 1603, 1490, 1447, 1408, 1368, 1256, 1156, 1038, 1006, 941, 883, 832, 765, 725, 690, 632, 556, 518;  $^1H$  NMR (400 MHz,  $Acetone-d_6$ )  $\delta$  7.81-7.72 (m, 2H), 7.72-7.65 (m, 4H), 7.53-7.44 (m, 2H), 7.44-7.35 (m, 1H), 6.18 (t,  $J = 9.2$  Hz, 1H), 3.96 (dd,  $J = 16.4, 9.5$  Hz, 1H), 3.67 (dd,  $J = 16.4, 9.0$  Hz, 1H);  $^{13}C$  NMR (150 MHz,  $CDCl_3$ )  $\delta$  143.1, 140.0, 134.8, 129.1, 128.1, 128.0, 127.3, 126.6, 109.8, 92.8, 80.2, 37.3; HRMS (DART Positive) m/z: calcd for  $C_{16}H_{13}N_2O_2$   $[M+H]^+$  265.0972, found 265.0969.

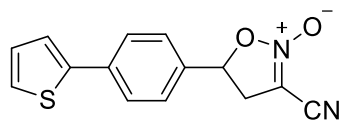

**3-Cyano-5-(4-(thiophen-2-yl)phenyl)-4,5-dihydroisoxazole 2-oxide (2s):** This compound was prepared according to *Method A* using 2-(4-(thiophen-2-yl)phenyl)cyclopropane-1,1-dicarbonitrile (0.2 mmol) and  $\text{Cu}(\text{NO}_3)_2 \cdot 3\text{H}_2\text{O}$  (0.24 mmol) at 65 °C for 36 h. The crude residue was purified by silica gel chromatography (PE/EA = 10:1, v/v) to give **2s** as a yellow solid (44.5 mg, 82%). mp: 161-162 °C. IR (KBr,  $\text{cm}^{-1}$ ): 3847, 3743, 3577, 2923, 2220, 1688, 1603, 1490, 1447, 1408, 1368, 1256, 1156, 1038, 1006, 941, 883, 832, 765, 725, 690, 632, 556, 518;  $^1\text{H}$  NMR (600 MHz,  $\text{CDCl}_3$ )  $\delta$  7.69 (d,  $J = 8.0$  Hz, 2H), 7.42-7.32 (m, 4H), 7.11 (t,  $J = 4.4$  Hz, 1H), 5.90 (t,  $J = 8.9$  Hz, 1H), 3.71 (dd,  $J = 16.3, 9.5$  Hz, 1H), 3.41 (dd,  $J = 16.3, 8.4$  Hz, 1H);  $^{13}\text{C}$  NMR (150 MHz,  $\text{CDCl}_3$ )  $\delta$  143.1, 136.3, 134.8, 128.4, 128.1, 126.8, 126.7, 125.9, 124.2, 120.5, 109.7, 92.8, 80.1, 37.3; HRMS (DART Positive)  $m/z$ : calcd for  $\text{C}_{14}\text{H}_{11}\text{O}_2\text{N}_2\text{S}$   $[\text{M}+\text{H}]^+$  271.0536, found 271.0536.

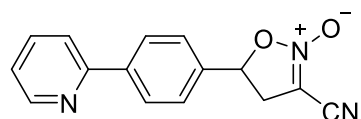

**3-Cyano-5-(4-(pyridin-2-yl)phenyl)-4,5-dihydroisoxazole 2-oxide (2t):** This compound was prepared according to *Method A* using 2-(4-(pyridin-2-yl)phenyl)cyclopropane-1,1-dicarbonitrile (0.2 mmol) and  $\text{Cu}(\text{NO}_3)_2 \cdot 3\text{H}_2\text{O}$  (0.24 mmol) at 65 °C for 36 h. The crude residue was purified by silica gel chromatography (PE/EA = 10:1, v/v) to give **2t** as a white solid (29.7 mg, 56%). mp: 150-151 °C. IR (KBr,  $\text{cm}^{-1}$ ): 3851, 3741, 3675, 3617, 2223, 1604, 1560, 1465, 1366, 1259, 1224, 1155, 885, 827, 783, 732, 557, 523;  $^1\text{H}$  NMR (400 MHz,  $\text{CDCl}_3$ )  $\delta$  8.71 (dt,  $J = 5.6, 1.2$  Hz, 1H), 8.11-8.05 (m, 2H), 7.83-7.71 (m, 2H), 7.53-7.46 (m, 2H), 7.32-7.24 (m, 1H), 5.94 (t,  $J = 8.9$  Hz, 1H), 3.73 (dd,  $J = 16.3, 9.5$  Hz, 1H), 3.42 (dd,  $J = 16.3, 8.4$  Hz, 1H);  $^{13}\text{C}$  NMR (150 MHz,  $\text{CDCl}_3$ )  $\delta$  156.2, 150.0, 141.1, 137.1, 136.5, 127.9, 126.4, 122.9, 120.8, 109.7, 92.9, 80.0, 37.3; HRMS (DART Positive)  $m/z$ : calcd for  $\text{C}_{15}\text{H}_{12}\text{O}_2\text{N}_3$   $[\text{M}+\text{H}]^+$  266.0924, found 266.0924.

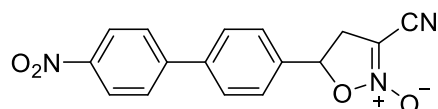

**3-Cyano-5-(4'-(4-nitrophenyl)-[1,1'-biphenyl]-4-yl)-4,5-dihydroisoxazole 2-oxide (2u):** This compound was prepared according to *Method A* using 2-(4'-(4-nitrophenyl)-[1,1'-biphenyl]-4-yl)cyclopropane-1,1-dicarbonitrile (0.2 mmol) and  $\text{Cu}(\text{NO}_3)_2 \cdot 3\text{H}_2\text{O}$  (0.24 mmol) at 65 °C for 36 h. The crude residue was purified by silica gel chromatography (PE/EA = 10:1, v/v) to give **2u** as a yellow oil (48.4 mg, 78%). IR (KBr,  $\text{cm}^{-1}$ ): 3739, 3441, 2926, 2222, 1624, 1511, 1447, 1374, 1343, 1241, 1110, 966, 884, 835, 808, 731, 687, 638, 586, 554, 485, 458;  $^1\text{H}$  NMR (600 MHz,  $\text{CDCl}_3$ )  $\delta$  8.31 (d,  $J = 8.7$  Hz, 2H), 7.73 (dd,  $J = 16.6, 8.3$  Hz, 4H), 7.54 (d,  $J = 8.1$  Hz, 2H), 5.98 (t,  $J = 8.8$  Hz, 1H), 3.79 (dd,  $J = 16.3, 9.6$  Hz, 1H), 3.43 (dd,  $J = 16.3, 8.1$  Hz, 1H);  $^{13}\text{C}$  NMR (150 MHz,  $\text{CDCl}_3$ )  $\delta$  147.6, 146.4, 140.5, 136.8, 128.4, 128.1, 126.8, 124.4, 109.7, 92.8, 79.7, 37.3; HRMS (DART Positive)  $m/z$ : calcd for  $\text{C}_{16}\text{H}_{12}\text{O}_4\text{N}_3$   $[\text{M}+\text{H}]^+$  310.0822, found 310.0822.

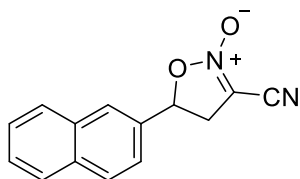

**3-Cyano-5-(naphthalen-2-yl)-4,5-dihydroisoxazole 2-oxide (4a):** This compound was prepared according to *Method A* using 2-(naphthalen-2-yl)cyclopropane-1,1-dicarbonitrile (0.2 mmol) and  $\text{Cu}(\text{NO}_3)_2 \cdot 3\text{H}_2\text{O}$  (0.24 mmol) at 65 °C for 24 h. The crude residue was purified by silica gel chromatography (PE/EA = 10:1, v/v) to give **4a** as a white solid (39.5 mg, 83%). mp: 146-147 °C; IR (KBr,  $\text{cm}^{-1}$ ): 2923, 2219, 1607, 1508, 1445, 1369, 1324, 1258, 1175, 940, 898, 830, 750, 609, 482;  $^1\text{H}$  NMR (400 MHz,  $\text{CDCl}_3$ )  $\delta$  7.95 (d,  $J$  = 8.6 Hz, 1H), 7.87 (ddd,  $J$  = 9.0, 4.5, 2.2 Hz, 3H), 7.62-7.52 (m, 2H), 7.45 (dd,  $J$  = 8.5, 1.9 Hz, 1H), 6.04 (t,  $J$  = 8.9 Hz, 1H), 3.74 (dd,  $J$  = 16.3, 9.6 Hz, 1H), 3.47 (dd,  $J$  = 16.3, 8.3 Hz, 1H);  $^{13}\text{C}$  NMR (125 MHz,  $\text{CDCl}_3$ )  $\delta$  133.7, 133.0, 132.9, 129.7, 128.2, 127.9, 127.3, 127.2, 125.9, 122.5, 109.7, 92.8, 80.4, 37.2; HRMS (DART Positive)  $m/z$ : calcd for  $\text{C}_{14}\text{H}_{11}\text{N}_2\text{O}_2$   $[\text{M}+\text{H}]^+$  239.0815, found 239.0814.

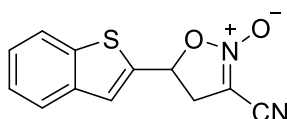

**5-(Benzo[b]thiophen-2-yl)-3-cyano-4,5-dihydroisoxazole 2-oxide (4b):** This compound was prepared according to *Method A* using 2-(benzo[b]thiophen-2-yl)cyclopropane-1,1-dicarbonitrile (0.2 mmol) and  $\text{Cu}(\text{NO}_3)_2 \cdot 3\text{H}_2\text{O}$  (0.24 mmol) at 65 °C for 24 h. The crude residue was purified by silica gel chromatography (PE/EA = 10:1, v/v) to give **4b** as a white solid (25.3 mg, 52%). mp: 156-157 °C; IR (KBr,  $\text{cm}^{-1}$ ): 3106, 2922, 2858, 2221, 1612, 1438, 1372, 1259, 1159, 1039, 930, 864, 835, 715, 640;  $^1\text{H}$  NMR (600 MHz,  $\text{CDCl}_3$ )  $\delta$  7.86 (dt,  $J$  = 7.5, 3.4 Hz, 1H), 7.83-7.77 (m, 1H), 7.44-7.39 (m, 3H), 6.19 (dd,  $J$  = 9.3, 7.5 Hz, 1H), 3.77 (dd,  $J$  = 16.4, 9.3 Hz, 1H), 3.58 (dd,  $J$  = 16.4, 7.5 Hz, 1H);  $^{13}\text{C}$  NMR (150 MHz,  $\text{CDCl}_3$ )  $\delta$  140.0, 138.7, 138.2, 126.0, 125.3, 124.7, 124.5, 122.8, 109.5, 92.6, 76.7, 37.2; HRMS (DART Positive)  $m/z$ : calcd for  $\text{C}_{12}\text{H}_9\text{N}_2\text{O}_2\text{S}$   $[\text{M}+\text{H}]^+$  245.0379, found 245.0376.

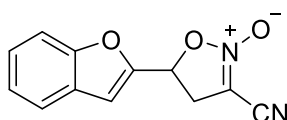

**5-(Benzofuran-2-yl)-3-cyano-4,5-dihydroisoxazole 2-oxide (4c):** This compound was prepared according to *Method A* using 2-(benzofuran-2-yl)cyclopropane-1,1-dicarbonitrile (0.2 mmol) and  $\text{Cu}(\text{NO}_3)_2 \cdot 3\text{H}_2\text{O}$  (0.24 mmol) at 65 °C for 24 h. The crude residue was purified by silica gel chromatography (PE/EA = 10:1, v/v) to give **4c** as a white solid (25.0 mg, 55%). mp: 100-101 °C; IR (KBr,  $\text{cm}^{-1}$ ): 3105, 2922, 2853, 2225, 1706, 1610, 1450, 1370, 1261, 1234, 1169, 1047, 986, 924, 861, 813, 763, 633, 559, 466;  $^1\text{H}$  NMR (600 MHz,  $\text{CDCl}_3$ )  $\delta$  7.61 (dt,  $J$  = 7.8, 1.0 Hz, 1H), 7.53 (dd,  $J$  = 8.3, 1.1 Hz, 1H), 7.39 (ddd,  $J$  = 8.4, 7.2, 1.3 Hz, 1H), 7.32-7.27 (m, 1H), 6.93 (s, 1H), 6.01 (dd,  $J$  = 9.7, 7.0 Hz, 1H), 3.73 (qd,  $J$  = 16.4, 8.3 Hz, 2H);  $^{13}\text{C}$  NMR (150 MHz,  $\text{CDCl}_3$ )  $\delta$  155.6, 149.5, 127.1, 126.3, 123.8, 122.0, 111.9, 109.6, 108.3, 92.5, 73.4, 33.5; HRMS (FI Positive)  $m/z$ : calcd for  $\text{C}_{12}\text{H}_8\text{N}_2\text{O}_3$   $[\text{M}]^+$  228.0529, found 228.0536.

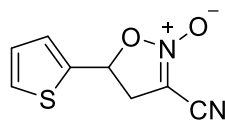

**3-Cyano-5-(thiophen-2-yl)-4,5-dihydroisoxazole 2-oxide (4d):** This compound was prepared according to *Method A* using 2-(thiophen-2-yl)cyclopropane-1,1-dicarbonitrile (0.2 mmol) and  $\text{Cu}(\text{NO}_3)_2 \cdot 3\text{H}_2\text{O}$  (0.24 mmol) at 60 °C for 36 h. The crude residue was purified by silica gel chromatography (PE/EA = 10:1, v/v) to give **4d** as a yellow oil (24.5 mg, 63%). IR (KBr,  $\text{cm}^{-1}$ ): 3106, 2922, 2858, 2221, 1612, 1438, 1372, 1259, 1159, 1039, 930, 864, 835, 715, 640;  $^1\text{H}$  NMR (500 MHz,  $\text{CDCl}_3$ )  $\delta$  7.46 (dd,  $J = 5.2, 1.2$  Hz, 1H), 7.22 (dt,  $J = 3.7, 0.9$  Hz, 1H), 7.07 (dd,  $J = 5.1, 3.6$  Hz, 1H), 6.13 (dd,  $J = 9.0, 8.1$  Hz, 1H), 3.72 (dd,  $J = 16.3, 9.2$  Hz, 1H), 3.53 (dd,  $J = 16.3, 8.1$  Hz, 1H);  $^{13}\text{C}$  NMR (125 MHz,  $\text{CDCl}_3$ )  $\delta$  137.7, 128.3, 128.3, 127.7, 109.6, 92.8, 76.4, 37.3; HRMS (DART Positive)  $m/z$ : calcd for  $\text{C}_8\text{H}_7\text{N}_2\text{O}_2\text{S}$   $[\text{M}+\text{H}]^+$  195.0223, found 195.0221.

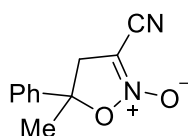

**3-Cyano-5-methyl-5-phenyl-4,5-dihydroisoxazole 2-oxide (4e):** This compound was prepared according to *Method A* using 2-methyl-2-phenylcyclopropane-1,1-dicarbonitrile (0.2 mmol) and  $\text{Cu}(\text{NO}_3)_2 \cdot 3\text{H}_2\text{O}$  (0.24 mmol) at 65 °C for 24 h. The crude residue was purified by silica gel chromatography (PE/EA = 10:1, v/v) to give **4e** as a yellow oil (25.0 mg, 62%). IR (KBr,  $\text{cm}^{-1}$ ): 3848, 3739, 2983, 2222, 1616, 1499, 1447, 1377, 1262, 1076, 977, 902, 846, 767, 700, 655, 556;  $^1\text{H}$  NMR (400 MHz,  $\text{CDCl}_3$ )  $\delta$  7.49-7.32 (m, 5H), 3.57-3.41 (m, 2H), 1.88 (s, 3H);  $^{13}\text{C}$  NMR (100 MHz,  $\text{CDCl}_3$ )  $\delta$  141.4, 129.2, 128.9, 124.0, 109.9, 93.4, 86.8, 43.3, 27.9; HRMS (DART Positive)  $m/z$ : calcd for  $\text{C}_{11}\text{H}_{11}\text{N}_2\text{O}_2$   $[\text{M}+\text{H}]^+$  203.0815, found 203.0815.

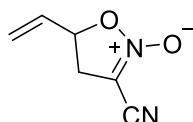

**3-Cyano-5-vinyl-4,5-dihydroisoxazole 2-oxide (4f):** This compound was prepared according to *Method A* using 2-vinylcyclopropane-1,1-dicarbonitrile (0.2 mmol) and  $\text{Cu}(\text{NO}_3)_2 \cdot 3\text{H}_2\text{O}$  (0.24 mmol) at 70 °C for 12 h. The crude residue was purified by silica gel chromatography (PE/EA = 10:1, v/v) to give **4f** as a yellow oil (6.6 mg, 24%). IR (KBr,  $\text{cm}^{-1}$ ): 3833, 3740, 3618, 2923, 2854, 2223, 1617, 1428, 1375, 1259, 991, 948, 903, 838;  $^1\text{H}$  NMR (400 MHz,  $\text{CDCl}_3$ )  $\delta$  5.94 (ddd,  $J = 17.2, 10.4, 6.7$  Hz, 1H), 5.59-5.43 (m, 2H), 5.34 (dddt,  $J = 9.6, 7.7, 6.7, 1.0$  Hz, 1H), 3.49 (ddd,  $J = 16.1, 9.4, 0.8$  Hz, 1H), 3.15 (ddd,  $J = 16.1, 7.6, 0.8$  Hz, 1H);  $^{13}\text{C}$  NMR (150 MHz,  $\text{CDCl}_3$ )  $\delta$  132.1, 121.4, 109.7, 92.6, 79.4, 35.1; HRMS (FI Positive)  $m/z$ : calcd for  $\text{C}_6\text{H}_6\text{N}_2\text{O}_2$   $[\text{M}]^+$  138.0424, found 138.0427.

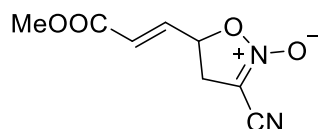

**(E)-3-Cyano-5-(3-methoxy-3-oxoprop-1-en-1-yl)-4,5-dihydroisoxazole 2-oxide (4g):** This compound was prepared according to *Method A* using methyl (*E*)-3-(2,2-dicyanocyclopropyl)-



acrylate (0.2 mmol) and  $\text{Cu}(\text{NO}_3)_2 \cdot 3\text{H}_2\text{O}$  (0.24 mmol) at 65 °C for 24 h. The crude residue was purified by silica gel chromatography (PE/EA = 10:1, v/v) to give **4g** as a yellow oil (11.8 mg, 30%). IR (KBr,  $\text{cm}^{-1}$ ): 3739, 2440, 2956, 2225, 1726, 1622, 1440, 1363, 1314, 1273, 1202, 978, 907, 844, 461;  $^1\text{H}$  NMR (400 MHz,  $\text{CDCl}_3$ )  $\delta$  6.88 (dd,  $J = 15.7, 5.4$  Hz, 1H), 6.22 (dd,  $J = 15.7, 1.5$  Hz, 1H), 5.51 (dddd,  $J = 9.8, 6.8, 5.4, 1.5$  Hz, 1H), 3.79 (s, 3H), 3.61 (dd,  $J = 16.2, 9.8$  Hz, 1H), 3.18 (dd,  $J = 16.2, 6.7$  Hz, 1H);  $^{13}\text{C}$  NMR (150 MHz,  $\text{CDCl}_3$ )  $\delta$  165.3, 139.7, 124.7, 109.2, 91.8, 76.2, 52.2, 34.9; HRMS (FI Positive)  $m/z$ : calcd for  $\text{C}_8\text{H}_9\text{N}_2\text{O}_4$   $[\text{M}+\text{H}]^+$  197.0557, found 197.0557.

### Part 3: Gram-scale synthesis of product 2a

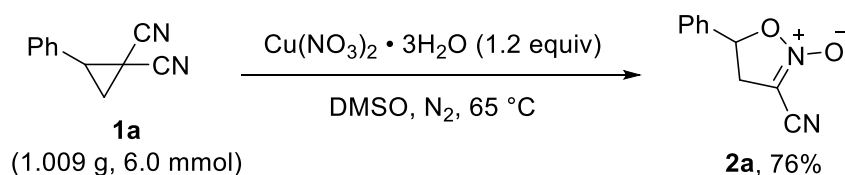

To a flask were added 2-phenylcyclopropane-1,1-dicarbonitrile (1.01 g, 6.0 mmol),  $\text{Cu}(\text{NO}_3)_2 \cdot 3\text{H}_2\text{O}$  (1.74 g, 7.2 mmol, 1.2 equiv), DMSO (20 mL). The reaction was stirred at 65 °C for 24 h under  $\text{N}_2$  as monitored by TLC. Upon completion, the reaction mixture was cooled down to room temperature, washed by water triple times, then extracted with DCM ( $3 \times 10$  mL). The combined organic phase was washed with water and brine, and dried over anhydrous  $\text{Na}_2\text{SO}_4$ , then evaporated under reduced pressure to give the crude product, which was further purified by column chromatography (PE/EA = 10:1, v/v) on silica gel to afford product **2a** (852.4 mg, 76%).

## 5. Further Transformation of Product 2a

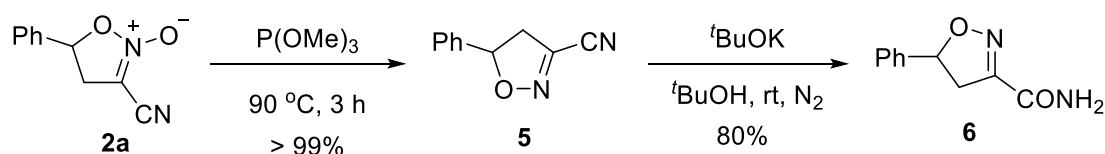

**5-Phenyl-4,5-dihydroisoxazole-3-carbonitrile (5):** Under a nitrogen atmosphere, isoxazoline *N*-oxide (**2a**, 18.8 mg, 0.1 mmol) was placed in a 10 mL Schlenk tube. Trimethylphosphite (1.5 mL) was then added at room temperature. The mixture was stirred at 90 °C for 3 h. After the mixture was cooled to room temperature, the volatiles were evaporated, the resulting residue was purified by flash chromatography (PE/EA = 10:1, v/v) to provide compound **5** as a colorless oil (18.0 mg, 99%).  $^1\text{H}$  NMR (400 MHz,  $\text{CDCl}_3$ )  $\delta$  7.48-7.35 (m, 3H), 7.35-7.26 (m, 2H), 5.84 (dd,  $J = 11.7, 9.1$  Hz, 1H), 3.61 (dd,  $J = 17.5, 11.7$  Hz, 1H), 3.18 (dd,  $J = 17.4, 9.1$  Hz, 1H);  $^{13}\text{C}$  NMR (125 MHz,  $\text{CDCl}_3$ )  $\delta$  138.0, 134.3, 129.4, 129.3, 126.0, 110.9, 128.1, 85.6, 42.9. Compound **5** was consistent with the literature data.<sup>[3]</sup>

**5-Phenyl-4,5-dihydroisoxazole-3-carboxamide (6):** To a dry flask were added compound **5** (34.4 mg, 0.2 mmol), potassium *t*-butoxide (67.3 mg, 0.6 mmol) and *t*-butanol (3 mL). The mixture was stirred at room temperature for 2 h. After completion, the volatiles were evaporated, the resulting residue was purified by column chromatography (PE/EA = 1:1, v/v) to afford compound **6** as a white solid (30.3 mg, 80%). mp: 170-171 °C;  $^1\text{H}$  NMR (500 MHz,  $\text{DMSO}-d_6$ )  $\delta$  7.45-7.31 (m, 5H), 5.73

(dd,  $J = 11.2, 8.8$  Hz, 1H), 3.64 (dd,  $J = 17.8, 11.3$  Hz, 1H), 3.10 (dd,  $J = 17.8, 8.9$  Hz, 1H);  $^{13}\text{C}$  NMR (125 MHz,  $\text{DMSO-}d_6$ )  $\delta$  161.1, 154.0, 140.2, 128.7, 128.4, 126.2, 83.4, 41.2. Compound **6** was consistent with the literature data.<sup>[4]</sup>

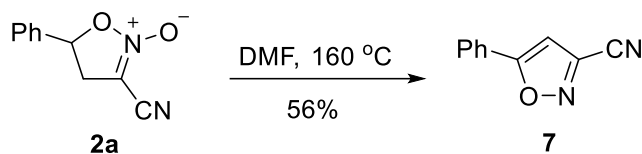

**5-Phenylisoxazole-3-carbonitrile (7):** Under a nitrogen atmosphere, isoxazoline *N*-oxide (**2a**, 0.2 mmol, 37.6 mg) was placed in a 10 mL Schlenk tube. *N,N*-dimethylformamide (2.0 mL) was then added at room temperature. The mixture was stirred at 160 °C for 2 h. After the mixture was cooled to room temperature, water (10 mL) was added to the mixture. The mixture was extracted with ethyl acetate (10 mL) three times. The combined organic layer was washed with brine (10 mL) and dried over anhydrous sodium sulfate, then evaporated under reduced pressure to give the crude product, which was further purified by column chromatography (PE/EA = 4:1, v/v) on silica gel to afford compound **7** as a white solid (19.2 mg, 56%). mp: 85-87 °C;  $^1\text{H}$  NMR (600 MHz,  $\text{CDCl}_3$ )  $\delta$  7.83-7.77 (m, 2H), 7.60-7.45 (m, 3H), 6.83 (s, 1H). Compound **7** was consistent with the literature data.<sup>[5]</sup>

## 6. Synthesis of Nitrosolacetols **9**

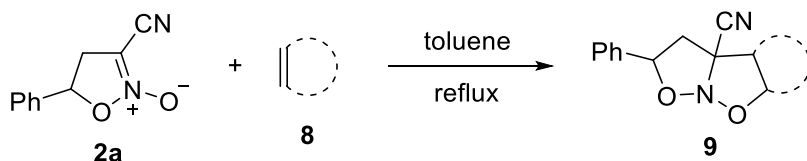

**General Procedure (Method B):** Under a nitrogen atmosphere, isoxazoline *N*-oxide (**2a**, 37.6 mg, 0.2 mmol) and olefins **8** (0.4 mmol) were placed in a 10 mL Schlenk tube. Toluene (2.0 mL) was then added at room temperature. The mixture was heated to reflux for 24 h. After the mixture was cooled to room temperature, the volatiles were evaporated, the resulting residue was purified by column chromatography (PE/EA) to afford the pure products.

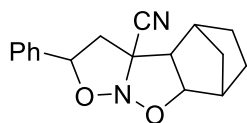

**2-Phenyloctahydro-3aH-4,7-methanobenzo[d]isoxazolo[2,3-b]isoxazole-3a-carbonitrile (9a):** This compound was prepared according to *Method B* using norbornene (37.6 mg, 0.4 mmol). The crude residue was purified by silica gel chromatography (PE/EA = 10:1, v/v) to give **9a** (major isomer) as a white solid (18.5 mg, 33%) and **9a'** (minor isomer) as a white solid (15.7 mg, 28%) with 61% total yield, d.r. = 1.2:1.

**9a** (major isomer): mp: 129-130 °C; IR (KBr,  $\text{cm}^{-1}$ ): 3037, 2919, 2245, 1495, 1456, 1381, 1324, 1287, 1217, 1018, 953, 895, 851, 798, 757, 696, 631, 568, 508;  $^1\text{H}$  NMR (500 MHz,  $\text{CDCl}_3$ )  $\delta$  7.46-7.30 (m, 5H), 5.33 (dd,  $J = 9.2, 7.4$  Hz, 1H), 4.73 (d,  $J = 6.3$  Hz, 1H), 3.18 (dd,  $J = 13.0, 7.4$  Hz, 1H), 2.60-2.56 (m, 2H), 2.49 (d,  $J = 4.1$  Hz, 1H), 2.43 (dd,  $J = 6.4, 1.7$  Hz, 1H), 1.96 (dt,  $J = 11.1,$

2.2 Hz, 1H), 1.66-1.50 (m, 2H), 1.28 (d,  $J = 11.1$  Hz, 1H), 1.17-1.02 (m, 2H);  $^{13}\text{C}$  NMR (125 MHz,  $\text{CDCl}_3$ )  $\delta$  137.9, 128.9, 128.7, 126.4, 116.9, 90.2, 80.8, 76.8, 58.2, 48.2, 40.0, 39.0, 33.5, 27.9, 22.9; HRMS (ESI Positive)  $m/z$ : calcd for  $\text{C}_{17}\text{H}_{19}\text{N}_2\text{O}_2$   $[\text{M}+\text{H}]^+$  283.1441, found 283.1441.

**9a'** (minor isomer): mp: 137-138 °C; IR (KBr,  $\text{cm}^{-1}$ ): 3306, 2965, 2883, 2247, 1610, 1454, 1370, 1285, 1218, 1121, 1021, 956, 917, 872, 827, 777, 706, 562;  $^1\text{H}$  NMR (500 MHz,  $\text{CDCl}_3$ )  $\delta$  7.40-7.31 (m, 5H), 5.48 (dd,  $J = 9.1, 6.6$  Hz, 1H), 4.61 (dt,  $J = 6.4, 1.4$  Hz, 1H), 2.87 (dd,  $J = 12.9, 6.6$  Hz, 1H), 2.81 (dd,  $J = 12.9, 9.1$  Hz, 1H), 2.62 (d,  $J = 3.6$  Hz, 1H), 2.52 (dd,  $J = 6.5, 1.8$  Hz, 1H), 2.48 (d,  $J = 4.3$  Hz, 1H), 1.91 (dp,  $J = 11.1, 2.0$  Hz, 1H), 1.69-1.55 (m, 2H), 1.29 (dp,  $J = 11.1, 1.6$  Hz, 1H), 1.23-1.06 (m, 2H);  $^{13}\text{C}$  NMR (125 MHz,  $\text{CDCl}_3$ )  $\delta$  137.0, 129.1, 129.0, 126.8, 116.9, 89.8, 82.4, 77.3, 58.3, 48.8, 40.7, 39.4, 33.4, 27.9, 22.8; HRMS (DART Positive)  $m/z$ : calcd for  $\text{C}_{17}\text{H}_{19}\text{N}_2\text{O}_2$   $[\text{M}+\text{H}]^+$  283.1441, found 283.1437.

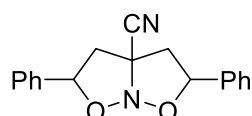

**2,5-Diphenyltetrahydro-3aH-isoxazolo[2,3-b]isoxazole-3a-carbonitrile (9b)**: This compound was prepared according to *Method B* using styrene (41.7 mg, 0.4 mmol). The crude residue was purified by silica gel chromatography (PE/EA = 10:1, v/v) to give **9b** (major isomer) as a white solid (29.2 mg, 50%) and **9b'** (minor isomer) as a white solid (25.5 mg, 44%) with 94% total yield, d.r. = 1.1:1.

**9b** (major isomer): mp: 78-79 °C; IR (KBr,  $\text{cm}^{-1}$ ): 2962, 2880, 2245, 1456, 1386, 1305, 1248, 1122, 1008, 922, 879, 804, 765, 699, 626, 556;  $^1\text{H}$  NMR (500 MHz,  $\text{CDCl}_3$ )  $\delta$  7.52-7.36 (m, 10H), 5.75 (dd,  $J = 9.8, 6.2$  Hz, 1H), 5.22 (dd,  $J = 9.9, 6.0$  Hz, 1H), 3.24 (dd,  $J = 13.0, 6.0$  Hz, 1H), 2.84 (dd,  $J = 12.9, 6.2$  Hz, 1H), 2.76 (dd,  $J = 12.9, 9.8$  Hz, 1H), 2.56 (dd,  $J = 13.0, 9.9$  Hz, 1H);  $^{13}\text{C}$  NMR (125 MHz,  $\text{CDCl}_3$ )  $\delta$  136.2, 135.4, 129.4, 129.1, 129.0, 127.2, 126.3, 119.2, 84.7, 77.6, 72.8, 47.8, 47.4; HRMS (DART Positive)  $m/z$ : calcd for  $\text{C}_{18}\text{H}_{17}\text{N}_2\text{O}_2$   $[\text{M}+\text{H}]^+$  293.1285, found 293.1280.

**9b'** (minor isomer): mp: 81-82 °C;  $^1\text{H}$  NMR (500 MHz,  $\text{CDCl}_3$ )  $\delta$  7.46-7.37 (m, 10H), 5.61 (dd,  $J = 9.5, 6.3$  Hz, 2H), 3.00 (dd,  $J = 13.1, 6.3$  Hz, 2H), 2.90 (dd,  $J = 13.2, 9.6$  Hz, 2H);  $^{13}\text{C}$  NMR (125 MHz,  $\text{CDCl}_3$ )  $\delta$  136.6, 129.2, 129.0, 126.7, 118.7, 83.9, 73.5, 47.7. Compound **9b'** (minor isomer) was consistent with the literature data.<sup>[4]</sup>

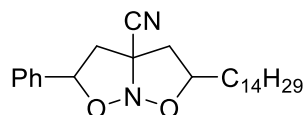

**2-Phenyl-5-tetradecyltetrahydro-3aH-isoxazolo[2,3-b]isoxazole-3a-carbonitrile (9c)**: This compound was prepared according to *Method B* using 1-hexadecene (89.8 mg, 0.4 mmol). The crude residue was purified by silica gel chromatography (PE/EA = 10:1, v/v) to give **9c** (major isomer) as a white solid (43.9 mg, 53%) and **9c'** (minor isomer) as a white solid (31.0 mg, 38%) with 91% total yield, d.r. = 1.4:1.

**9c** (major isomer): mp: 73-74 °C; IR (KBr,  $\text{cm}^{-1}$ ): 2919, 2851, 2242, 1462, 1381, 1311, 1053, 996, 917, 844, 804, 767, 707;  $^1\text{H}$  NMR (400 MHz,  $\text{CDCl}_3$ )  $\delta$  7.41-7.32 (m, 5H), 5.12 (dd,  $J = 10.0, 5.8$  Hz, 1H), 4.77 (dq,  $J = 9.7, 6.1$  Hz, 1H), 3.15 (dd,  $J = 12.9, 5.8$  Hz, 1H), 2.52 (dd,  $J = 12.5, 5.5$  Hz, 1H), 2.38 (ddd,  $J = 15.2, 12.7, 9.9$  Hz, 2H), 1.83 (dtd,  $J = 16.6, 6.8, 3.4$  Hz, 1H), 1.68 (dq,  $J = 13.8,$

5.3 Hz, 1H), 1.52-1.14 (m, 24H), 0.88 (t,  $J = 6.8$  Hz, 3H);  $^{13}\text{C}$  NMR (125 MHz,  $\text{CDCl}_3$ )  $\delta$  136.26, 128.97, 128.95, 126.24, 119.51, 82.85, 77.31, 72.22, 47.63, 45.73, 32.35, 32.05, 29.82, 29.80, 29.78, 29.75, 29.63, 29.61, 29.49, 26.19, 22.82, 14.25; HRMS (ESI Positive)  $m/z$ : calcd for  $\text{C}_{26}\text{H}_{40}\text{N}_2\text{O}_2\text{Na}$   $[\text{M}+\text{Na}]^+$  435.2982, found 435.2983.

**9c'** (minor isomer): mp: 80-81 °C; IR (KBr,  $\text{cm}^{-1}$ ): 3431, 2921, 2850, 2246, 1460, 1340, 1325, 1022, 905, 803, 758, 697, 624, 560;  $^1\text{H}$  NMR (500 MHz,  $\text{CDCl}_3$ )  $\delta$  7.44-7.34 (m, 5H), 5.48 (dd,  $J = 9.5$ , 6.4 Hz, 1H), 4.61 (ddt,  $J = 9.4$ , 7.1, 5.8 Hz, 1H), 2.94-2.81 (m, 2H), 2.71 (dd,  $J = 12.9$ , 5.9 Hz, 1H), 2.56 (dd,  $J = 12.9$ , 9.4 Hz, 1H), 1.81 (dddd,  $J = 13.7$ , 9.9, 7.0, 5.2 Hz, 1H), 1.70-1.59 (m, 1H), 1.54-1.16 (m, 24H), 0.94-0.88 (m, 3H);  $^{13}\text{C}$  NMR (125 MHz,  $\text{CDCl}_3$ )  $\delta$  136.71, 129.11, 128.96, 126.65, 119.07, 83.73, 82.72, 72.90, 48.14, 45.50, 33.75, 32.05, 29.81, 29.80, 29.78, 29.74, 29.63, 29.57, 29.55, 29.48, 26.07, 22.81, 14.24; HRMS (ESI Positive)  $m/z$ : calcd for  $\text{C}_{26}\text{H}_{40}\text{N}_2\text{O}_2\text{Na}$   $[\text{M}+\text{Na}]^+$  435.2982, found 435.2983.

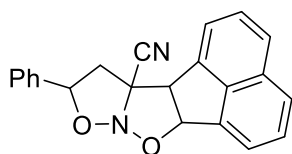

**11a-((12-Azanylidene)-13-methyl)-10-phenyl-6b,11,11a,11b-tetrahydro-10H-acenaphtho[1,2-d]isoxazolo[2,3-b]isoxazole (9d)**: This compound was prepared according to *Method B* using acenaphthylene (60.9 mg, 0.4 mmol). The crude residue was purified by silica gel chromatography (PE/EA = 10:1, v/v) to give **9d** (mixture of isomers) as a yellow solid (31.6 mg, 46%), d.r. = 1.5:1. mp: 113-114 °C; IR (KBr,  $\text{cm}^{-1}$ ): 3645, 3042, 2915, 2244, 1760, 1610, 1493, 1449, 1366, 1312, 1214, 1014, 902, 831, 775, 701, 572;  $^1\text{H}$  NMR (500 MHz,  $\text{CDCl}_3$ )  $\delta$  7.94-7.90 (m, 1.46H), 7.87 (dd,  $J = 8.2$ , 5.5 Hz, 2.61H), 7.82 (d,  $J = 8.2$  Hz, 1H), 7.74-7.61 (m, 7.47H), 7.60-7.54 (m, 1.12H), 7.51 (dd,  $J = 10.4$ , 6.9 Hz, 2.57H), 7.38-7.29 (m, 8.29H), 7.16 (qd,  $J = 8.6$ , 7.7, 3.6 Hz, 3.04H), 6.98-6.93 (m, 2.06H), 6.22 (d,  $J = 6.9$  Hz, 1H), 6.14 (d,  $J = 6.9$  Hz, 1.42H), 5.57 (dd,  $J = 10.4$ , 6.9 Hz, 1.10H), 5.34 (dd,  $J = 9.0$ , 6.4 Hz, 1.51H), 5.08 (d,  $J = 6.9$  Hz, 1.37H), 4.99 (d,  $J = 6.9$  Hz, 0.95H), 2.63 (dd,  $J = 13.3$ , 6.9 Hz, 1.10H), 2.34 (qd,  $J = 13.5$ , 7.7 Hz, 3.19H), 1.99 (dd,  $J = 13.2$ , 10.4 Hz, 1.05H);  $^{13}\text{C}$  NMR (125 MHz,  $\text{CDCl}_3$ )  $\delta$  138.9, 138.5, 138.4, 138.1, 138.0, 137.6, 137.2, 137.2, 131.8, 131.7, 129.0, 128.92, 128.86, 128.8, 128.62, 128.58, 128.4, 127.1, 127.0, 126.5, 126.3, 125.59, 125.56, 122.9, 122.6, 121.5, 121.4, 119.5, 118.2, 88.0, 86.4, 84.1, 83.0, 75.4, 75.3, 57.8, 56.0, 42.0, 41.5; HRMS (ESI Positive)  $m/z$ : calcd for  $\text{C}_{22}\text{H}_{16}\text{N}_2\text{O}_2\text{Na}$   $[\text{M}+\text{Na}]^+$  363.1104, found 363.1103.

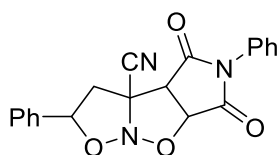

**4,6-Dioxo-2,5-diphenylhexahydroisoxazolo[2,3-b]pyrrolo[3,4-d]isoxazole-3a(3bH)-carbonitrile (9e)**: This compound was prepared according to *Method B* using *N*-phenylmaleimide (69.3 mg, 0.4 mmol). The mixture was heated to reflux for 72 h. The crude residue was purified by silica gel chromatography (PE/EA = 10:1, v/v) to give **9e** (mixture of isomers) as a white solid (14.0 mg, 34%) and **2a** (15.3 mg, 59% conv.). mp: 175-176 °C; IR (KBr,  $\text{cm}^{-1}$ ): 3485, 2925, 1720, 1496, 1453, 1392, 1320, 1206, 1005, 952, 829, 752, 696, 622;  $^1\text{H}$  NMR (500 MHz,  $\text{CDCl}_3$ )  $\delta$  7.55-7.11 (m, 10H), 6.63-6.56 (m, 1.20 H), 5.60 (dd,  $J = 8.2$ , 7.1 Hz, 0.99 H), 5.37 (t,  $J = 8.3$  Hz, 0.62 H), 5.03 (dd,  $J = 9.2$ , 6.1 Hz, 0.44H), 4.06 (dd,  $J = 8.2$ , 3.0 Hz, 1.08H), 3.98-3.88 (m, 0.54H), 3.62 (dd,

$J = 13.8, 8.6$  Hz, 0.65H), 3.09 (dd,  $J = 13.8, 8.0$  Hz, 0.60H), 2.81 (dd,  $J = 13.7, 6.1$  Hz, 0.43 H);  $^{13}\text{C}$  NMR (125 MHz,  $\text{CDCl}_3$ )  $\delta$  176.1, 173.6, 170.8, 170.3, 146.2, 133.9, 130.4, 129.8, 129.5, 129.3, 129.1, 129.0, 126.9, 126.4, 126.0, 119.9, 116.6, 114.1, 83.6, 76.6, 75.0, 53.3, 51.9, 38.6, 36.4; HRMS (ESI Positive)  $m/z$ : calcd for  $\text{C}_{20}\text{H}_{15}\text{N}_3\text{O}_4\text{Na}$   $[\text{M}+\text{Na}]^+$  384.0955, found 384.0955.

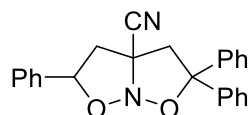

**2,2,5-Triphenyltetrahydro-3aH-isoxazolo[2,3-b]isoxazole-3a-carbonitrile (9f):** This compound was prepared according to *Method B* using ethene-1,1-diylidibenzene (72.1 mg, 0.4 mmol). The mixture was heated to reflux for 5 days. The crude residue was purified by silica gel chromatography (PE/EA = 10:1, v/v) to give **9f** as a white solid (18.4 mg, 34%). mp: 123-124 °C; IR (KBr,  $\text{cm}^{-1}$ ): 3394, 3024, 2933, 2831, 2245, 1604, 1492, 1445, 1366, 1228, 1070, 975, 916, 763, 697;  $^1\text{H}$  NMR (500 MHz,  $\text{CDCl}_3$ )  $\delta$  7.60 (dd,  $J = 7.4, 1.8$  Hz, 2H), 7.48-7.27 (m, 13H), 5.59 (dd,  $J = 10.2, 5.7$  Hz, 1H), 3.78 (d,  $J = 13.1$  Hz, 1H), 3.16 (d,  $J = 13.1$  Hz, 1H), 2.78 (dd,  $J = 12.8, 5.8$  Hz, 1H), 2.68 (dd,  $J = 12.8, 10.2$  Hz, 1H);  $^{13}\text{C}$  NMR (125 MHz,  $\text{CDCl}_3$ )  $\delta$  142.4, 142.1, 135.1, 129.3, 129.0, 128.8, 128.7, 128.2, 128.1, 127.2, 125.9, 125.6, 118.7, 87.3, 84.0, 72.7, 51.2, 48.2; HRMS (ESI Positive)  $m/z$ : calcd for  $\text{C}_{24}\text{H}_{20}\text{N}_2\text{O}_2\text{Na}$   $[\text{M}+\text{Na}]^+$  391.1417, found 391.1414.

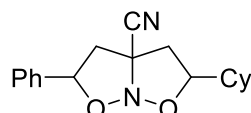

**2-Cyclohexyl-5-phenyltetrahydro-3aH-isoxazolo[2,3-b]isoxazole-3a-carbonitrile (9g):** This compound was prepared according to *Method B* using vinylcyclohexane (44.1 mg, 0.4 mmol). The mixture was heated to reflux for 48 h. The crude residue was purified by silica gel chromatography (PE/EA = 10:1, v/v) to give **9g** (major isomer) as a white solid (24.5 mg, 41%) and **9g'** (minor isomer) as a white solid (17.0 mg, 29%) with 70% total yield, d.r. = 1.4:1.

**9g** (major isomer): mp: 145-146 °C; IR (KBr,  $\text{cm}^{-1}$ ): 3436, 2930, 2858, 2246, 1637, 1453, 1390, 1114, 1060, 977, 846, 760, 699, 628, 569;  $^1\text{H}$  NMR (500 MHz,  $\text{CDCl}_3$ )  $\delta$  7.42-7.32 (m, 5H), 5.13 (dd,  $J = 9.9, 5.9$  Hz, 1H), 4.51 (q,  $J = 7.7$  Hz, 1H), 3.15 (dd,  $J = 12.9, 5.9$  Hz, 1H), 2.47-2.36 (m, 3H), 1.99 (ddt,  $J = 13.2, 3.9, 2.0$  Hz, 1H), 1.80-1.73 (m, 2H), 1.73-1.59 (m, 3H), 1.26 (dddd,  $J = 29.4, 16.9, 6.8, 3.4$  Hz, 3H), 1.07 (dtd,  $J = 11.9, 8.2, 4.1$  Hz, 2H);  $^{13}\text{C}$  NMR (125 MHz,  $\text{CDCl}_3$ )  $\delta$  136.3, 130.0, 129.9, 126.3, 119.5, 87.0, 72.1, 47.6, 43.6, 40.6, 29.9, 29.3, 25.9, 25.6; HRMS (DART Positive)  $m/z$ : calcd for  $\text{C}_{18}\text{H}_{23}\text{N}_2\text{O}_2$   $[\text{M}+\text{H}]^+$  299.1754, found 299.1753.

**9g'** (minor isomer): mp: 127-128 °C; IR (KBr,  $\text{cm}^{-1}$ ): 3039, 2928, 2855, 2246, 1453, 1372, 1283, 1066, 1016, 963, 894, 823, 755, 697, 632, 570;  $^1\text{H}$  NMR (500 MHz,  $\text{CDCl}_3$ )  $\delta$  7.43-7.32 (m, 5H), 5.45 (dd,  $J = 9.9, 6.4$  Hz, 1H), 4.31 (dt,  $J = 8.5, 7.3$  Hz, 1H), 2.91-2.78 (m, 2H), 2.66-2.56 (m, 2H), 2.00 (dtd,  $J = 13.1, 3.6, 1.8$  Hz, 1H), 1.86-1.66 (m, 2H), 1.62-1.58 (m, 2H), 1.29-1.15 (m, 4H), 1.05 (qd,  $J = 12.2, 3.6$  Hz, 2H);  $^{13}\text{C}$  NMR (125 MHz,  $\text{CDCl}_3$ )  $\delta$  136.8, 129.1, 129.0, 128.7, 119.0, 86.9, 83.7, 72.9, 48.1, 43.4, 41.8, 29.8, 29.0, 26.3, 25.8, 25.6; HRMS (DART Positive)  $m/z$ : calcd for  $\text{C}_{18}\text{H}_{23}\text{N}_2\text{O}_2$   $[\text{M}+\text{H}]^+$  299.1754, found 299.1753.

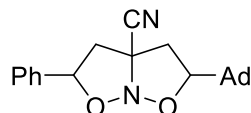

**2-((3s)-Adamantan-1-yl)-5-phenyltetrahydro-3aH-isoxazolo[2,3-b]isoxazole-3a-carbonitrile**

**(9h)**: This compound was prepared according to *Method B* using 1-vinyladamantane (64.9 mg, 0.4 mmol). The mixture was heated to reflux for 48 h. The crude residue was purified by silica gel chromatography (PE/EA = 10:1, v/v) to give **9h** (major isomer) as a white solid (32.2 mg, 46%) and **9h'** (minor isomer) as a white solid (20.1 mg, 29%) with 75% total yield, d.r. = 1.6:1.

**9h** (major isomer): mp: 146-147 °C; IR (KBr, cm<sup>-1</sup>): 3037, 2900, 2850, 2669, 2246, 1496, 1452, 1374, 1299, 1049, 976, 911, 843, 808, 759, 693, 626, 565, 507; <sup>1</sup>H NMR (500 MHz, CDCl<sub>3</sub>) δ 7.40-7.32 (m, 5H), 5.16 (dd, *J* = 9.5, 6.4 Hz, 1H), 4.37 (dd, *J* = 9.5, 6.6 Hz, 1H), 3.16 (dd, *J* = 12.9, 6.4 Hz, 1H), 2.66-2.57 (m, 1H), 2.46 (dd, *J* = 12.9, 9.5 Hz, 1H), 2.25 (dd, *J* = 12.7, 6.6 Hz, 1H), 2.03 (p, *J* = 3.2 Hz, 3H), 1.76-1.67 (m, 9H), 1.57-1.52 (m, 3H); <sup>13</sup>C NMR (125 MHz, CDCl<sub>3</sub>) δ 136.7, 129.0, 128.9, 126.3, 119.4, 90.7, 72.1, 47.4, 39.2, 38.5, 37.0, 34.4, 28.1; HRMS (DART Positive) *m/z*: calcd for C<sub>22</sub>H<sub>27</sub>N<sub>2</sub>O<sub>2</sub> [M+H]<sup>+</sup> 351.2067, found 351.2064.

**9h'** (minor isomer): mp: 146-147 °C; IR (KBr, cm<sup>-1</sup>): 3437, 3030, 2906, 2850, 2669, 2250, 1641, 1454, 1330, 1099, 1029, 903, 807, 757, 697, 627, 567, 511; <sup>1</sup>H NMR (500 MHz, CDCl<sub>3</sub>) δ 7.40-7.32 (m, 5H), 5.16 (dd, *J* = 9.5, 6.4 Hz, 1H), 4.37 (dd, *J* = 9.5, 6.6 Hz, 1H), 3.16 (dd, *J* = 12.9, 6.4 Hz, 1H), 2.66-2.57 (m, 1H), 2.46 (dd, *J* = 12.9, 9.5 Hz, 1H), 2.25 (dd, *J* = 12.7, 6.6 Hz, 1H), 2.03 (p, *J* = 3.2 Hz, 3H), 1.76-1.67 (m, 9H), 1.57-1.52 (m, 3H); <sup>13</sup>C NMR (125 MHz, CDCl<sub>3</sub>) δ 137.2, 129.0, 128.9, 126.6, 118.9, 90.5, 83.3, 72.9, 47.9, 38.7, 38.2, 37.0, 35.1, 28.1; HRMS (DART Positive) *m/z*: calcd for C<sub>22</sub>H<sub>27</sub>N<sub>2</sub>O<sub>2</sub> [M+H]<sup>+</sup> 351.2067, found 351.2064.

## 7. X-Ray Crystallographic Analysis for Compounds **2a** and **9a**

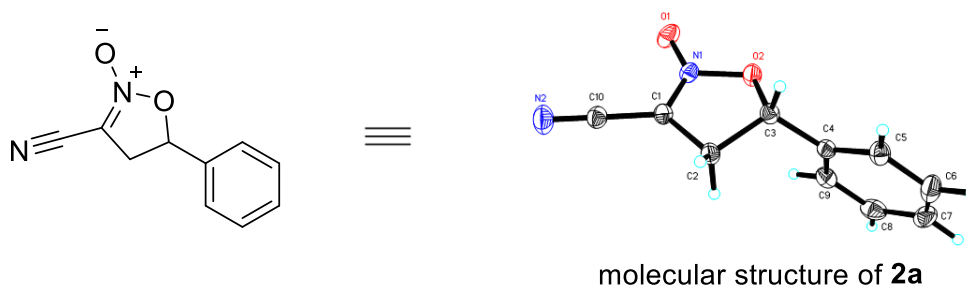

The compound **2a** was recrystallized in toluene by a solvent evaporation method, affording a single crystal suitable for X-ray diffraction.

Crystallographic data for **2a**:  $C_{10}H_8N_2O_2$ ,  $M = 188.18$ , Crystal system: Orthorhombic, Space group: P 212121 (No. 8),  $a = 6.1062$  (2) Å,  $b = 7.7462$  (4) Å,  $c = 19.4842$  (8) Å,  $\alpha = 90^\circ$ ,  $\beta = 90^\circ$ ,  $\gamma = 90^\circ$ ,  $V = 921.60$  (7) Å<sup>3</sup>,  $Z = 4$ , Crystal size:  $0.16 \times 0.13 \times 0.10$  mm,  $T = 193$  (2) K,  $\rho_{\text{calcd}} = 1.356$  g·cm<sup>-3</sup>, Final R indices [ $I > 2\sigma(I)$ ]:  $R_1 = 0.0317$ ,  $wR_2 = 0.0747$ , R indices (all data):  $R_1 = 0.0349$ ,  $wR_2 = 0.0773$ , GOF = 1.046, Reflections collected: 4576, Independent reflections: 1799 [ $R(\text{int}) = 0.0203$ ], Data: 1799, restraints: 0, parameters: 127. CCDC 2072311 contains the supplementary crystallographic data for this paper. The data can be obtained free of charge from The Cambridge Crystallographic Data Centre via [www.ccdc.cam.ac.uk/data\\_request/cif](http://www.ccdc.cam.ac.uk/data_request/cif).

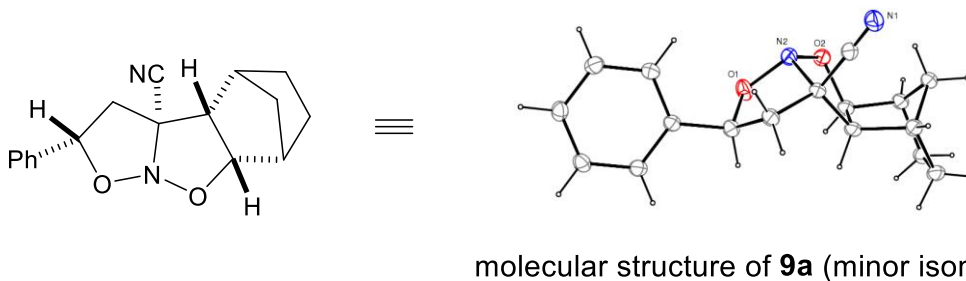

The compound **9a** was recrystallized in toluene by a solvent evaporation method, affording a single crystal suitable for X-ray diffraction.

Crystallographic data for **9a** (minor isomer):  $C_{17}H_{18}N_2O_2$ ,  $M = 282.33$ , monoclinic, P 21 (No. 10),  $a = 9.5508$  (7) Å,  $b = 5.7679$  (4) Å,  $c = 13.0789$  (10) Å,  $\beta = 104.975$  (4)°,  $V = 696.02$  (9) Å<sup>3</sup>,  $Z = 2$ , Crystal size:  $0.25 \times 0.18 \times 0.15$  mm,  $T = 150$  K,  $\rho_{\text{calcd}} = 1.347$  g·cm<sup>-3</sup>,  $R_1 = 0.0550$  ( $I > 4\sigma(I)$ ),  $wR_2 = 0.1457$  (all data), GOF = 1.089, reflections collected/unique: 3744 / 2273 ( $R(\text{int}) = 0.0374$ ), Data: 2143 restraints: 0, parameters: 190. CCDC 2072312 contains the supplementary crystallographic data for this paper. The data can be obtained free of charge from The Cambridge Crystallographic Data Centre via [www.ccdc.cam.ac.uk/data\\_request/cif](http://www.ccdc.cam.ac.uk/data_request/cif).

## 8. Mechanistic Studies

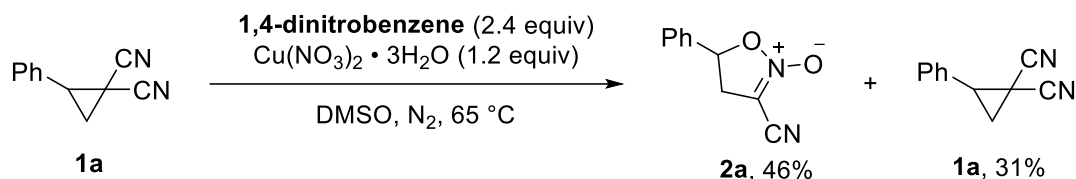

To a test tube were added **1a** (0.2 mmol),  $\text{Cu}(\text{NO}_3)_2 \cdot 3\text{H}_2\text{O}$  (0.24 mmol), 1,4-dinitrobenzene (0.48 mmol), DMSO (2.0 mL). The reaction was stirred at 65 °C for 15 h under  $\text{N}_2$  as monitored by TLC. Upon completion, the reaction mixture was cooled down to room temperature, extracted with DCM ( $3 \times 10$  mL). The combined organic phase was washed with water and brine, and dried over anhydrous  $\text{Na}_2\text{SO}_4$ , then evaporated under reduced pressure to give the crude product, which was further purified by column chromatography on silica gel to afford **2a** (17.2 mg, 46%), **1a** (10.3 mg, 31%) and 1,4-dinitrobenzene (77.1 mg, 96%).

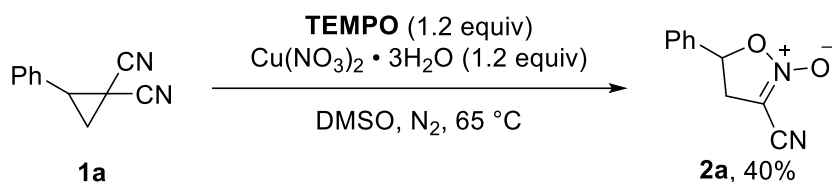

To a test tube were added **1a** (0.2 mmol), 2,2,6,6-tetramethylpiperidine-1-oxyl (TEMPO) (0.24 mmol),  $\text{Cu}(\text{NO}_3)_2 \cdot 3\text{H}_2\text{O}$  (0.24 mmol), DMSO (2.0 mL). The reaction was stirred at 65 °C for 15 h under  $\text{N}_2$  as monitored by TLC. Upon completion, the reaction mixture was cooled down to room temperature, extracted with DCM ( $3 \times 10$  mL). The combined organic phase was washed with water and brine, and dried over anhydrous  $\text{Na}_2\text{SO}_4$ , then evaporated under reduced pressure to give the crude product, which was further purified by column chromatography on silica gel to afford **2a** (15.1 mg, 40%).

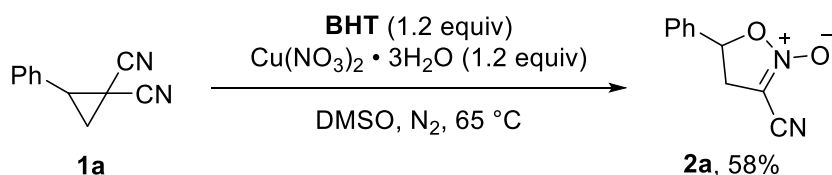

To a test tube were added **1a** (0.2 mmol), butylated hydroxytoluene (BHT) (0.24 mmol),  $\text{Cu}(\text{NO}_3)_2 \cdot 3\text{H}_2\text{O}$  (0.24 mmol), DMSO (2.0 mL). The reaction was stirred at 65 °C for 15 h under  $\text{N}_2$  as monitored by TLC. Upon completion, the reaction mixture was cooled down to room temperature, extracted with DCM ( $3 \times 10$  mL). The combined organic phase was washed with water and brine, and dried over anhydrous  $\text{Na}_2\text{SO}_4$ , then evaporated under reduced pressure to give the crude product, which was further purified by column chromatography on silica gel to afford **2a** (21.7 mg, 46%).

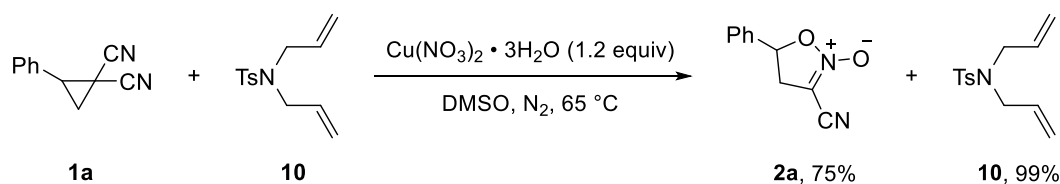

To a test tube were added **1a** (33.6 mg, 0.2 mmol), *N,N*-diallyl-4-methylbenzenesulfonamide (60.3 mg, 0.24 mmol),  $\text{Cu}(\text{NO}_3)_2 \cdot 3\text{H}_2\text{O}$  (0.24 mmol), DMSO (2.0 mL). The reaction was stirred at 65 °C



for 15 h under N<sub>2</sub> as monitored by TLC. Upon completion, the reaction mixture was cooled down to room temperature, extracted with DCM (3×10 mL). The combined organic phase was washed with water and brine, and dried over anhydrous Na<sub>2</sub>SO<sub>4</sub>, then evaporated under reduced pressure to give the crude product, which was further purified by column chromatography on silica gel to afford **2a** (28.3 mg, 75%) and *N,N*-diallyl-4-methylbenzenesulfonamide (60.5 mg, 99%).

## 9. Details of Calculation and Discussion

All of the DFT calculations were performed with the Gaussian 09 program package.<sup>[6]</sup> The geometry optimization of all the minima involved were performed at the M06 level of theory<sup>[7]</sup> with Grimme's D3 empirical dispersion correction<sup>[8]</sup> with 6-31G(d) + SDD (for Cu) basis set<sup>[9]</sup> (keyword 5D) and the SMD model<sup>[10]</sup> in DMSO as a solvent. The structures of the reactants, intermediates, transition states, and products were fully optimized without any restriction. The vibrational frequencies were computed at the same level to check whether each optimized structure is an energy minimum or a transition state and to evaluate its zero-point vibrational energy (ZPVE) and thermal corrections at 298 K. IRC calculations<sup>[11]</sup> were used to confirm that the transition states found from the optimization calculations connect the related reactants and products. Single-point calculations were performed with 6-311+G(d,p) + SDD (for Cu) basis set at the optimized geometries with 6-31G(d) + SDD (for Cu) basis set for all the intermediates and transition states. Through the same approach full optimization, without any restriction, was carried out for the model reactions. The reported energies are Gibbs free energies in DMSO solution ( $\Delta G_{\text{DMSO}}$ ).

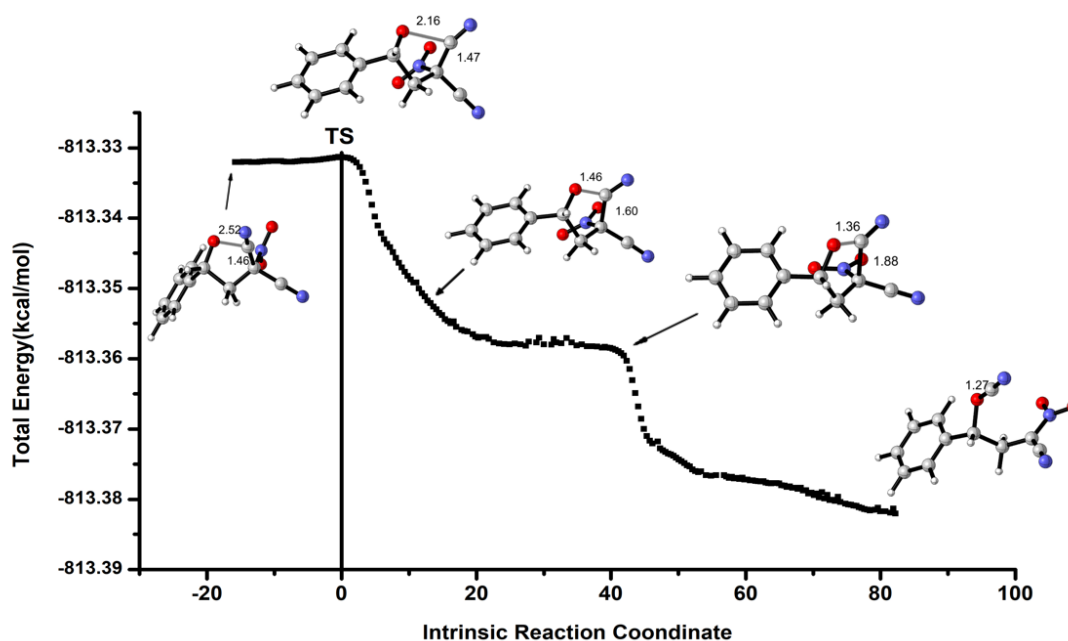

**Figure S1** The novel cyano-migration process around IRC of TS3a.

### DFT-Computed Energies of All Stationary Points

**Table S2.** Sum of electronic and thermal enthalpies ( $H$ , in Hartree), sum of electronic and thermal free energies ( $G$ , in Hartree), thermal Correction to Gibbs free energy ( $CGFE$ , in Hartree), electronic energy in DMSO ( $E_{\text{DMSO}}$ , in Hartree), and free energies in DMSO ( $G_{\text{DMSO}}$ , in Hartree). For transition state structures, one imaginary frequency (IFreq) was observed and given below. For all minimum structures, no imaginary frequency was observed.

| Structure                                                   | $H$          | $G$         | $CGFE$    | $E_{\text{DMSO}}$ | $G_{\text{DMSO}}$ | IFreq   |
|-------------------------------------------------------------|--------------|-------------|-----------|-------------------|-------------------|---------|
| <b>1a</b>                                                   | -532.866156  | -532.913331 | 0.123409  | -533.182542       | -533.059133       |         |
| <b>TS1a</b>                                                 | -813.133882  | -813.195836 | 0.129384  | -813.569636       | -813.440252       | -302.59 |
| <b>INT1a</b>                                                | -813.155194  | -813.215833 | 0.132816  | -813.588379       | -813.455563       |         |
| <b>TS2a</b>                                                 | -813.132755  | -813.190021 | 0.133696  | -813.564709       | -813.431013       | -271.83 |
| <b>INT2a</b>                                                | -813.140773  | -813.200713 | 0.131374  | -813.575328       | -813.443954       |         |
| <b>TS3a</b>                                                 | -813.141622  | -813.197390 | 0.133959  | -813.569861       | -813.435021       | -61.47  |
| <b>INT3a</b>                                                | -813.190847  | -813.250889 | 0.133714  | -813.627664       | -813.49395        |         |
| <b>TS3a</b>                                                 | -813.166434  | -813.224861 | 0.133419  | -813.601654       | -813.468235       | -495.99 |
| <b>2a</b>                                                   | -645.095372  | -645.147065 | 0.125959  | -645.450727       | -645.324768       |         |
| <b>OCN<sup>-</sup></b>                                      | -168.103938  | -168.128830 | -0.010134 | -168.190118       | -168.200252       |         |
| <b>NO<sub>3</sub><sup>-</sup></b>                           | -280.278827  | -280.307714 | -0.009980 | -280.406777       | -280.416757       |         |
| <b>INT1b</b>                                                | -1570.917318 | -1571.00297 | 0.151732  | -1571.55091       | -1571.39918       |         |
| <b>TS1b</b>                                                 | -1570.890538 | -1570.97767 | 0.149922  | -1571.52708       | -1571.37716       | -376.00 |
| <b>INT2b</b>                                                | -1570.926018 | -1571.01159 | 0.154058  | -1571.55564       | -1571.40158       |         |
| <b>TS2b</b>                                                 | -1570.882107 | -1570.96471 | 0.153559  | -1571.5137        | -1571.36015       | -235.35 |
| <b>INT3b</b>                                                | -1570.888751 | -1570.97906 | 0.146441  | -1571.52111       | -1571.37467       |         |
| <b>TS3b</b>                                                 | -1570.879868 | -1570.96195 | 0.154266  | -1571.51247       | -1571.35821       | -91.13  |
| <b>TS3c</b>                                                 | -1570.88675  | -1570.97065 | 0.152366  | -1571.51857       | -1571.3662        | -57.26  |
| <b>INT4b</b>                                                | -1570.945471 | -1571.03073 | 0.154416  | -1571.5766        | -1571.42219       |         |
| <b>INT4c</b>                                                | -1570.967173 | -1571.04895 | 0.158309  | -1571.59426       | -1571.43595       |         |
| <b>TS4c</b>                                                 | -1570.938794 | -1571.02127 | 0.155744  | -1571.56773       | -1571.41199       | -276.82 |
| <b>INT5c</b>                                                | -1570.939349 | -1571.02594 | 0.152444  | -1571.57642       | -1571.42397       |         |
| <b>TS4b</b>                                                 | -1570.917318 | -1571.00297 | 0.151732  | -1571.550912      | -1571.39918       | -492.39 |
| <b>TS5c</b>                                                 | -1570.938468 | -1571.02382 | 0.152451  | -1571.56883       | -1571.41638       | -455.06 |
| <b>Cu(NO<sub>3</sub>)<sub>2</sub><br/>(OCN<sup>-</sup>)</b> | -925.885149  | -925.943037 | 0.001921  | -926.160763       | -926.158842       |         |
| <b>1v</b>                                                   | -668.418357  | -668.459689 | 0.163176  | -668.807400       | -668.644224       |         |
| <b>TS1v</b>                                                 | -948.683710  | -948.732076 | 0.171782  | -949.188078       | -949.016296       | -335.18 |
| <b>INT1v</b>                                                | -948.699263  | -948.746210 | 0.175476  | -949.202617       | -949.027141       |         |
| <b>TS2v</b>                                                 | -948.679270  | -948.723662 | 0.176510  | -949.181679       | -949.005169       | -282.84 |
| <b>INT1w</b>                                                | -1426.146943 | -1426.22557 | 0.186598  | -1426.75136       | -1426.56476       |         |
| <b>TS1w</b>                                                 | -1706.420723 | -1706.51564 | 0.188733  | -1707.143863      | -1706.95513       | -352.12 |
| <b>INT2w</b>                                                | -1706.456265 | -1706.54630 | 0.197058  | -1707.17206       | -1706.97500       |         |
| <b>TS2w</b>                                                 | -1706.416605 | -1706.50568 | 0.194727  | -1707.13473       | -1706.94000       | -282.00 |

### The coordinates of all stationary points (Å)

**1a**

|   |             |             |             |
|---|-------------|-------------|-------------|
| C | -1.76612600 | -0.16579100 | -0.16164000 |
| C | -0.65817800 | -0.67798400 | 0.80525000  |
| C | -1.41989800 | -1.64718500 | 0.00425800  |
| C | -2.98612600 | 0.31918600  | 0.42124900  |
| N | -3.96837200 | 0.69872300  | 0.91241000  |
| C | -1.33768600 | 0.49797900  | -1.36178600 |
| N | -0.96687000 | 1.03505800  | -2.32295200 |
| H | -2.18399600 | -2.24751800 | 0.49211800  |
| H | -0.95361700 | -2.10150900 | -0.86840900 |
| H | -0.96947800 | -0.56401000 | 1.84493700  |
| C | 0.75546200  | -0.31620800 | 0.51460200  |
| C | 1.23097800  | 0.93690400  | 0.91531600  |
| C | 1.61520800  | -1.19563600 | -0.14358200 |
| C | 2.54654200  | 1.30271900  | 0.66036100  |
| H | 0.55685500  | 1.62558900  | 1.42599700  |
| C | 2.93461700  | -0.82868500 | -0.39696400 |
| H | 1.25934900  | -2.17852500 | -0.45035300 |
| C | 3.40150700  | 0.41938100  | 0.00244200  |
| H | 2.90735400  | 2.28032500  | 0.97612900  |
| H | 3.59930200  | -1.52419000 | -0.90674400 |
| H | 4.43311700  | 0.70529000  | -0.19692000 |

**TS1a**

|   |             |             |             |
|---|-------------|-------------|-------------|
| C | 0.38947600  | 0.13349400  | 0.01852300  |
| C | 0.74971000  | 1.07745400  | -1.03138500 |
| C | 0.05725500  | 2.19407000  | -0.26823700 |
| H | 1.82929200  | 1.22820600  | -1.11230700 |
| H | 0.31014400  | 0.89650300  | -2.01612600 |
| C | 0.77733800  | 2.94952600  | 0.66882800  |
| N | 1.39999200  | 3.56484300  | 1.44835300  |
| C | -1.28155600 | 2.50870000  | -0.53260700 |
| N | -2.40678300 | 2.73372700  | -0.77290900 |
| H | 0.99717900  | 0.19006600  | 0.91927100  |
| N | 2.80648000  | -1.43743700 | -0.19530400 |
| O | 3.18932400  | -0.39020300 | 0.35040800  |
| O | 3.57696600  | -2.37063600 | -0.43446700 |
| O | 1.57763800  | -1.56874700 | -0.52391700 |
| C | -0.87374100 | -0.57628600 | 0.11543100  |
| C | -1.76529900 | -0.68525400 | -0.96121400 |
| C | -1.18127300 | -1.21541400 | 1.32566600  |
| C | -2.94549300 | -1.40346300 | -0.81929300 |
| H | -1.53668100 | -0.21207500 | -1.91487300 |

|   |             |             |             |
|---|-------------|-------------|-------------|
| C | -2.35942600 | -1.93443700 | 1.46360200  |
| H | -0.47975200 | -1.13717600 | 2.15644000  |
| C | -3.24550200 | -2.02597400 | 0.39108400  |
| H | -3.63499100 | -1.48055700 | -1.65800400 |
| H | -2.59040000 | -2.42445600 | 2.40780400  |
| H | -4.17295800 | -2.58625400 | 0.49822100  |

**INT1a**

|   |             |             |             |
|---|-------------|-------------|-------------|
| C | -0.96379100 | -0.95187600 | 0.69076900  |
| C | -0.03593800 | -0.46257700 | -0.41594500 |
| C | -2.42990700 | -0.85820700 | 0.33872300  |
| H | -0.69016800 | -2.00169800 | 0.87460700  |
| H | -0.76936800 | -0.41387400 | 1.62683400  |
| H | -0.25072800 | -1.06456400 | -1.31231400 |
| O | -0.44280600 | 0.84336900  | -0.95512300 |
| N | -0.28583100 | 1.93412800  | -0.13407500 |
| C | -3.04074200 | -1.86810900 | -0.40046400 |
| N | -3.53471100 | -2.74480700 | -1.01356800 |
| C | -3.12050300 | 0.32399500  | 0.59680900  |
| N | -3.66892800 | 1.33678700  | 0.84460800  |
| O | -0.60674800 | 2.96768500  | -0.66353300 |
| O | 0.14000800  | 1.76472600  | 0.98317400  |
| C | 1.45046700  | -0.49659000 | -0.15970700 |
| C | 1.99388300  | -0.91588300 | 1.05455200  |
| C | 2.31235200  | -0.11791900 | -1.19331200 |
| C | 3.37470100  | -0.95377400 | 1.23198100  |
| H | 1.34280200  | -1.21165400 | 1.87529800  |
| C | 3.69020900  | -0.14627300 | -1.01427300 |
| H | 1.89337100  | 0.20762200  | -2.14619700 |
| C | 4.22572300  | -0.56655600 | 0.20173900  |
| H | 3.78475900  | -1.28419500 | 2.18522400  |
| H | 4.34829200  | 0.15501400  | -1.82795300 |
| H | 5.30497300  | -0.59302300 | 0.34437500  |

**TS2a**

|   |             |             |             |
|---|-------------|-------------|-------------|
| C | -0.48570900 | -0.84320200 | 0.79785800  |
| C | 0.30653400  | -0.72331500 | -0.54025200 |
| C | -1.90397200 | -0.46958900 | 0.48458700  |
| H | -0.37311500 | -1.85426100 | 1.20766000  |
| H | -0.10983700 | -0.13007700 | 1.54156700  |
| H | 0.28043000  | -1.72742000 | -1.00809400 |
| O | -0.32400400 | 0.15751600  | -1.39980400 |
| N | -1.44067200 | 1.08565900  | -0.57432000 |
| C | -2.62426700 | -1.31578500 | -0.41066300 |

|   |             |             |             |   |            |             |             |
|---|-------------|-------------|-------------|---|------------|-------------|-------------|
| N | -3.19387700 | -1.98545600 | -1.17575900 | C | 0.70445400 | 0.17379800  | -1.26516800 |
| C | -2.69219300 | 0.10554000  | 1.52169600  | C | 0.32340800 | -0.88101900 | -0.74855900 |
| N | -3.32288000 | 0.62502000  | 2.35367300  | C | 1.65559400 | 0.39698600  | -0.09815200 |
| O | -2.33144000 | 1.37857200  | -1.35600500 | H | 0.29437600 | 1.13681500  | -1.59338500 |
| O | -0.87187600 | 1.86359400  | 0.19104600  | H | 1.31314000 | -0.21503600 | -2.08913900 |
| C | 1.74900600  | -0.37572300 | -0.24552800 | H | 0.46967200 | -1.59376200 | -1.60536800 |
| C | 2.62982300  | -1.37439400 | 0.17278300  | O | 0.18092600 | -1.46728300 | 0.35834600  |
| C | 2.20725300  | 0.93761000  | -0.34836900 | N | 2.39792400 | -0.93283200 | 0.22202600  |
| C | 3.94972100  | -1.06576300 | 0.49039300  | C | 0.97916700 | 0.83045500  | 1.12614600  |
| H | 2.27626900  | -2.40525000 | 0.24386000  | N | 0.50536500 | 1.35255900  | 2.05005000  |
| C | 3.52745300  | 1.24731800  | -0.03402500 | C | 2.70881000 | 1.35503400  | -0.45757600 |
| H | 1.50899500  | 1.70626700  | -0.67553300 | N | 3.55533600 | 2.09452900  | -0.74654900 |
| C | 4.40230900  | 0.24792200  | 0.38779700  | O | 2.76415500 | -1.08571500 | 1.37566700  |
| H | 4.62886800  | -1.85400800 | 0.81369300  | O | 2.80186900 | -1.55518100 | -0.74686100 |
| H | 3.87730500  | 2.27587900  | -0.11903000 | C | 1.71921000 | -0.30823500 | -0.46858500 |
| H | 5.43589500  | 0.49112800  | 0.63116100  | C | 2.69462600 | -1.24105900 | -0.09138900 |

### INT2a

|   |             |             |             |   |            |             |             |
|---|-------------|-------------|-------------|---|------------|-------------|-------------|
| C | -0.45938600 | 0.88612300  | -0.55252800 | H | 2.41369300 | -2.29445700 | -0.05210200 |
| C | 0.36523600  | 0.63510800  | 0.76539800  | C | 3.37868900 | 1.44004600  | -0.15682000 |
| C | -1.83789000 | 0.31513800  | -0.25935100 | H | 1.36176900 | 1.80623100  | -0.77110400 |
| H | -0.54478900 | 1.94429200  | -0.83208000 | C | 4.33554200 | 0.49975000  | 0.20610100  |
| H | -0.06577200 | 0.33509900  | -1.41618600 | H | 4.72589900 | -1.60057900 | 0.51777900  |
| H | 0.38335600  | 1.63539800  | 1.28370100  | H | 3.63541000 | 2.49905500  | -0.18045800 |
| O | -0.23160700 | -0.32601200 | 1.48178900  | H | 5.34657600 | 0.81255900  | 0.46436400  |

### INT3a

|   |             |             |             |   |             |             |             |
|---|-------------|-------------|-------------|---|-------------|-------------|-------------|
| N | -3.03364200 | 1.51481700  | 1.73843800  | C | -0.43278300 | 0.09896200  | -1.03309100 |
| C | -2.71480900 | 0.42835100  | -1.43007200 | C | 0.35593000  | 0.12863500  | 0.26778500  |
| N | -3.39783400 | 0.50069700  | -2.36554100 | C | -1.91354000 | 0.09598600  | -0.84800000 |
| O | -2.54477300 | -1.70536300 | 0.75517000  | H | -0.10709100 | 0.97904500  | -1.60923200 |
| O | -1.00185800 | -1.82327300 | -0.77386100 | H | -0.13485900 | -0.78996300 | -1.60751400 |
| C | 1.80711500  | 0.35233600  | 0.35189600  | H | 0.06672200  | 1.00495300  | 0.86144000  |
| C | 2.64816000  | 1.36919500  | -0.10501100 | O | -0.02553900 | -1.07491000 | 1.07108000  |
| C | 2.28995300  | -0.95372500 | 0.39645600  | N | -2.53969100 | 1.21297800  | -0.34506400 |
| C | 3.94886400  | 1.08497500  | -0.51290600 | C | -2.69461100 | -1.04498600 | -1.05182300 |
| H | 2.27868400  | 2.39753900  | -0.13458100 | N | -3.30180800 | -2.03133800 | -1.24055900 |
| C | 3.59046400  | -1.24378400 | -0.00772000 | C | -1.05292200 | -0.95198300 | 1.81115600  |
| H | 1.61317900  | -1.72451500 | 0.76415400  | N | -1.96871400 | -0.88845700 | 2.53622400  |
| C | 4.42468200  | -0.22484000 | -0.46487400 | O | -3.77371600 | 1.20439500  | -0.15412500 |
| H | 4.59695800  | 1.88765600  | -0.86480700 | O | -1.83889600 | 2.22068500  | -0.09330700 |
| H | 3.95891000  | -2.26895400 | 0.03577600  | C | 1.83694300  | 0.06983900  | 0.08205800  |
| H | 5.44410700  | -0.44892900 | -0.77743100 | C | 2.61401900  | 1.18182700  | 0.40476900  |
|   |             |             |             | C | 2.44841200  | -1.06443900 | -0.45925000 |

### TS3a

|   |            |             |             |   |             |             |             |
|---|------------|-------------|-------------|---|-------------|-------------|-------------|
| C | 3.98890400 | 1.16562800  | 0.18696400  | N | 1.97604900  | 0.91228000  | -0.11650800 |
| H | 2.13547600 | 2.06497200  | 0.82874500  | C | 3.47490700  | -0.85596500 | 0.27870000  |
| C | 3.82333000 | -1.08541900 | -0.66178600 | N | 4.53466500  | -1.26483400 | 0.53827400  |
| H | 1.84767700 | -1.93839300 | -0.71324500 | O | 2.71304200  | 1.86555300  | 0.04263700  |
| C | 4.59544200 | 0.03071200  | -0.34250500 | C | -1.39804100 | -0.06829800 | -0.31257300 |
| H | 4.58714100 | 2.03940000  | 0.44058000  | C | -2.44799800 | -0.26808300 | -1.20625700 |
| H | 4.29511500 | -1.97548200 | -1.07518800 | C | -1.67016700 | 0.11830400  | 1.04546100  |
| H | 5.67177000 | 0.01324500  | -0.50664100 | C | -3.76248900 | -0.29451200 | -0.74694300 |

**TS4a**

|   |             |             |             |
|---|-------------|-------------|-------------|
| C | 0.47964300  | 0.41844400  | -0.65399000 |
| C | 0.38975700  | 1.80014200  | -0.05420000 |
| C | 1.85827100  | -0.12091000 | -0.39026500 |
| H | 0.35564400  | 0.53923000  | -1.73976300 |
| H | 0.96066300  | 2.61209600  | -0.48898200 |
| H | -0.13942700 | 1.98841400  | 0.87306200  |
| O | -1.15957600 | 2.35825500  | -1.06994500 |
| N | 2.55904900  | 0.44809700  | 0.61520400  |
| C | 2.37639600  | -1.25548300 | -1.02420700 |
| N | 2.76904600  | -2.20432800 | -1.58475500 |
| C | -2.22315800 | 2.16399000  | -0.45860300 |
| N | -3.23448100 | 1.98203600  | 0.12640900  |
| O | 3.66719000  | 0.04692500  | 0.99439700  |
| O | 2.00497700  | 1.46623000  | 1.17410900  |
| C | -0.61611700 | -0.49770300 | -0.14835300 |
| C | -1.51219400 | -1.08034000 | -1.04201700 |
| C | -0.74823200 | -0.75435000 | 1.21891200  |
| C | -2.53779600 | -1.90118400 | -0.57777300 |
| H | -1.41199900 | -0.87655900 | -2.10911500 |
| C | -1.77406500 | -1.56853400 | 1.68404700  |
| H | -0.04514200 | -0.30688800 | 1.92419700  |
| C | -2.67340000 | -2.14212700 | 0.78573100  |
| H | -3.23677400 | -2.34623400 | -1.28456500 |
| H | -1.87475600 | -1.75597400 | 2.75215300  |
| H | -3.47885600 | -2.77766700 | 1.15082700  |

**2a**

|   |            |             |             |
|---|------------|-------------|-------------|
| C | 0.92452600 | -1.15654200 | -0.23000200 |
| C | 0.01381100 | -0.06492300 | -0.80769400 |
| C | 2.18702500 | -0.39353400 | -0.04029700 |
| H | 0.54970600 | -1.55074000 | 0.72589500  |
| H | 1.02982200 | -1.99377800 | -0.92690200 |
| H | 0.04273900 | -0.08967900 | -1.90547800 |
| O | 0.64428900 | 1.19224900  | -0.40758900 |

|   |             |             |             |
|---|-------------|-------------|-------------|
| H | -2.23219300 | -0.40629200 | -2.26585900 |
| C | -2.98230100 | 0.10369500  | 1.50106100  |
| H | -0.85070100 | 0.28351600  | 1.74613600  |
| C | -4.03042900 | -0.10648600 | 0.60534700  |
| H | -4.57770700 | -0.45529900 | -1.45044200 |
| H | -3.19001300 | 0.25638800  | 2.55891800  |
| H | -5.05837000 | -0.12058400 | 0.96416000  |

**NO<sub>3</sub><sup>-</sup>**

|   |            |             |             |
|---|------------|-------------|-------------|
| N | 0.00000000 | 0.00000000  | -0.00028100 |
| O | 0.00000000 | 1.08408800  | -0.62545000 |
| O | 0.00000000 | 0.00000000  | 1.25114700  |
| O | 0.00000000 | -1.08408800 | -0.62545000 |

**OCN<sup>-</sup>**

|   |            |            |             |
|---|------------|------------|-------------|
| O | 0.00000000 | 0.00000000 | 1.15197100  |
| C | 0.00000000 | 0.00000000 | -0.06414400 |
| N | 0.00000000 | 0.00000000 | -1.26155800 |

**INT1b**

|    |             |             |             |
|----|-------------|-------------|-------------|
| Cu | 2.54426600  | -0.19935500 | 0.46383100  |
| O  | 3.42592500  | -1.09635100 | -1.10271200 |
| N  | 4.24866600  | -0.12602200 | -1.24875000 |
| O  | 5.07463700  | -0.09349400 | -2.11481800 |
| O  | 4.09789700  | 0.79945400  | -0.38352900 |
| C  | -2.22445600 | -0.42138700 | 1.13939300  |
| C  | -2.36797500 | -1.69342900 | 1.85199700  |
| C  | -1.46616300 | -1.71316100 | 0.61466600  |
| H  | -1.85358400 | -1.81474200 | 2.80217200  |
| H  | -3.27876700 | -2.27854500 | 1.73530500  |
| C  | -0.05488400 | -1.65454500 | 0.76879600  |
| N  | 1.09238700  | -1.52943400 | 0.89937800  |
| C  | -1.95070300 | -2.33673500 | -0.58317600 |
| N  | -2.37153900 | -2.82256400 | -1.55035500 |
| H  | -1.51126300 | 0.27821300  | 1.58029400  |
| N  | 0.95644300  | 1.79903300  | 0.82484900  |

|   |             |             |             |
|---|-------------|-------------|-------------|
| O | 0.82574300  | 1.31944000  | -0.31452800 |
| O | 1.83744300  | 1.23619100  | 1.59575100  |
| O | 0.31893900  | 2.73747000  | 1.25247600  |
| C | -3.23082800 | 0.21215200  | 0.25725800  |
| C | -4.48790900 | -0.34650600 | 0.01335800  |
| C | -2.88009300 | 1.41531300  | -0.36461400 |
| C | -5.37892200 | 0.29145700  | -0.84380400 |
| H | -4.78059000 | -1.27764200 | 0.49792500  |
| C | -3.77130400 | 2.04923500  | -1.22067300 |
| H | -1.89866500 | 1.85028900  | -0.17007900 |
| C | -5.02283200 | 1.48677600  | -1.46264200 |
| H | -6.35839600 | -0.14798800 | -1.02473800 |
| H | -3.48920800 | 2.98531500  | -1.69954600 |
| H | -5.72317400 | 1.98259700  | -2.13276100 |

### INT2b

|    |             |             |             |
|----|-------------|-------------|-------------|
| C  | -2.01934100 | -0.60255400 | -0.33319000 |
| C  | -1.75531600 | -0.33665100 | -1.81039200 |
| C  | -0.57047700 | 0.59191100  | -1.97226100 |
| H  | -1.54097300 | -1.29974000 | -2.29365000 |
| H  | -2.62395000 | 0.09476800  | -2.31754700 |
| C  | 0.70154900  | 0.11444600  | -1.90421700 |
| N  | 1.80228300  | -0.34150200 | -1.90954300 |
| C  | -0.75466600 | 1.97746600  | -2.13500000 |
| N  | -0.93612300 | 3.12497700  | -2.27564600 |
| H  | -1.08238400 | -0.97677600 | 0.09889700  |
| N  | -4.12458000 | -1.81709500 | -0.52915900 |
| O  | -4.54105000 | -0.85167100 | -1.12306100 |
| O  | -4.71282400 | -2.82636100 | -0.23670500 |
| O  | -2.81527000 | -1.82348400 | -0.11233700 |
| C  | -2.50015200 | 0.53959600  | 0.52219600  |
| C  | -3.26476800 | 1.59836800  | 0.02643900  |
| C  | -2.15391700 | 0.52431400  | 1.87696800  |
| C  | -3.67868200 | 2.62083700  | 0.87431200  |
| H  | -3.54243600 | 1.63282400  | -1.02536200 |
| C  | -2.57616400 | 1.54105100  | 2.72597000  |
| H  | -1.52525200 | -0.28423300 | 2.25518300  |
| C  | -3.34112500 | 2.59150700  | 2.22486500  |
| H  | -4.27073000 | 3.44344900  | 0.47640400  |
| H  | -2.29777700 | 1.51948400  | 3.77844500  |
| H  | -3.66831200 | 3.39289200  | 2.88576600  |
| Cu | 2.91773600  | -0.53854900 | -0.35588700 |
| O  | 4.28656700  | 0.94142300  | -0.69893200 |
| N  | 4.95741900  | 0.60273800  | 0.33451000  |

|   |            |             |            |
|---|------------|-------------|------------|
| O | 5.95270200 | 1.18103400  | 0.68451000 |
| O | 4.47813400 | -0.39952700 | 0.96073000 |
| N | 1.08643400 | -1.26709600 | 1.34076500 |
| O | 1.19387300 | -0.02981800 | 1.32298300 |
| O | 1.87083100 | -1.94532400 | 0.56913400 |
| O | 0.27676100 | -1.86885100 | 2.02892400 |

### INT3b

|    |             |             |             |
|----|-------------|-------------|-------------|
| C  | 1.59017200  | 0.61626200  | 0.22682600  |
| C  | 3.01835400  | 0.68804600  | -0.33751500 |
| C  | 0.85182100  | 1.96884200  | 0.28717700  |
| H  | 0.96769700  | -0.05400800 | -0.37927700 |
| H  | 1.61069800  | 0.22312500  | 1.25288000  |
| H  | 2.92809100  | 0.89611300  | -1.44103200 |
| O  | 3.71458300  | 1.76254900  | 0.08461300  |
| N  | 0.89058600  | 2.61383100  | -1.14961400 |
| C  | -0.54945400 | 1.66670800  | 0.56439800  |
| N  | -1.62873700 | 1.27018800  | 0.70597300  |
| C  | 1.40060600  | 2.92531000  | 1.24677900  |
| N  | 1.78470600  | 3.66416500  | 2.05206900  |
| O  | 1.48785500  | 3.65544400  | -1.27443800 |
| O  | 0.33667400  | 1.96564400  | -2.00846300 |
| C  | 3.72005500  | -0.65375000 | -0.22107800 |
| C  | 3.05081600  | -1.82930700 | -0.56973700 |
| C  | 5.03320300  | -0.71787700 | 0.24256500  |
| C  | 3.68875300  | -3.05838200 | -0.43352900 |
| H  | 2.02021200  | -1.80716700 | -0.92418100 |
| C  | 5.66929300  | -1.94868400 | 0.37016300  |
| H  | 5.55208600  | 0.20048300  | 0.51088700  |
| C  | 4.99807400  | -3.12236600 | 0.03511400  |
| H  | 3.15296200  | -3.96999800 | -0.69488000 |
| H  | 6.69233700  | -1.99087600 | 0.74097800  |
| H  | 5.49357600  | -4.08606000 | 0.14329200  |
| Cu | -2.91632000 | -0.11882300 | 0.46174100  |
| O  | -4.40257900 | -0.20575000 | -1.11991600 |
| N  | -5.31096200 | -0.55130500 | -0.30827700 |
| O  | -6.45415300 | -0.77157900 | -0.67757600 |
| O  | -4.97234500 | -0.65654000 | 0.90840900  |
| N  | -0.83940000 | -1.94622500 | 0.07262900  |
| O  | -0.78996100 | -1.18842900 | -0.91923400 |
| O  | -1.83775700 | -1.86326600 | 0.86166100  |
| O  | 0.04919600  | -2.76421300 | 0.31049100  |

### INT4b

|               |             |             |             |               |             |             |             |
|---------------|-------------|-------------|-------------|---------------|-------------|-------------|-------------|
| C             | 1.70096600  | -0.04858800 | 0.24464700  | C             | 0.18283500  | 1.09452600  | 0.55421000  |
| C             | 2.01176700  | 0.85838600  | 1.43047100  | N             | -1.01588000 | 1.24784900  | 0.25765300  |
| C             | 0.78332000  | 0.60067700  | -0.76066300 | C             | 0.81184300  | 3.47410200  | 0.87170100  |
| H             | 1.10499500  | -0.87544300 | 0.66331000  | N             | 0.45837500  | 4.46895100  | 1.35148200  |
| H             | 1.10091600  | 1.26318800  | 1.88267500  | O             | 0.75211200  | 3.24112100  | -1.71261000 |
| H             | 2.70378600  | 1.67074500  | 1.19507900  | O             | 2.00887800  | 1.47593900  | -1.75828500 |
| O             | 2.61178300  | 0.04397000  | 2.50088200  | C             | 2.93839200  | -0.79935500 | 0.26305200  |
| N             | 0.98622400  | 1.88258800  | -1.29729500 | C             | 4.33445500  | -0.84005800 | 0.29605600  |
| C             | -0.35934300 | -0.02838700 | -1.16469700 | C             | 2.24780000  | -1.65367000 | -0.59443300 |
| N             | -1.35400300 | -0.60310500 | -1.46149500 | C             | 5.03428600  | -1.71197000 | -0.53031900 |
| C             | 3.87389500  | -0.13048200 | 2.45104900  | H             | 4.87691300  | -0.18317200 | 0.97870900  |
| N             | 5.02828400  | -0.31222800 | 2.47182100  | C             | 2.95151200  | -2.52657800 | -1.42160500 |
| O             | 0.20770800  | 2.29644500  | -2.16311300 | H             | 1.15831700  | -1.64276900 | -0.61358900 |
| O             | 1.93281000  | 2.55985200  | -0.87039900 | C             | 4.34238300  | -2.55828400 | -1.39486800 |
| C             | 2.96166600  | -0.66331900 | -0.33447100 | H             | 6.12259600  | -1.73344200 | -0.49687200 |
| C             | 3.19874800  | -2.02636800 | -0.14778300 | H             | 2.40330500  | -3.18865500 | -2.09087100 |
| C             | 3.93004000  | 0.10991200  | -0.98477000 | H             | 4.88791900  | -3.24314200 | -2.04251300 |
| C             | 4.38553800  | -2.60856200 | -0.58482900 | Cu-2.33477300 | -0.08057500 | 0.33415900  |             |
| H             | 2.44868300  | -2.63345300 | 0.36116500  | O             | -3.53427400 | 0.51573800  | -1.31605400 |
| C             | 5.11445100  | -0.47161500 | -1.42253500 | N             | -4.42391400 | -0.31901200 | -0.96703600 |
| H             | 3.75799300  | 1.17474800  | -1.13508000 | O             | -5.45035900 | -0.48440200 | -1.58188000 |
| C             | 5.34932600  | -1.82980300 | -1.21783000 | O             | -4.14998500 | -0.97943900 | 0.09286100  |
| H             | 4.55800000  | -3.67199800 | -0.42559200 | N             | -1.00199700 | -2.18126600 | 1.03337500  |
| H             | 5.86315500  | 0.14210200  | -1.92159500 | O             | -1.10497000 | -2.09393900 | -0.20776800 |
| H             | 6.28164600  | -2.27946600 | -1.55628900 | O             | -1.66364100 | -1.32951300 | 1.73990900  |
| Cu-2.98819900 | -0.22098700 | -0.46148900 |             | O             | -0.31894500 | -3.01921800 | 1.59189200  |
| O             | -3.75530800 | -2.08620800 | -0.24533800 |               |             |             |             |
| N             | -4.82343800 | -1.61878700 | 0.28071400  |               |             |             |             |
| O             | -5.72165700 | -2.31690000 | 0.66598800  |               |             |             |             |
| O             | -4.84485900 | -0.34458000 | 0.36021100  |               |             |             |             |
| N             | -1.95254900 | 1.70240200  | 0.91317400  |               |             |             |             |
| O             | -1.82128600 | 0.61678800  | 1.50773100  |               |             |             |             |
| O             | -2.64733400 | 1.69198800  | -0.18326000 |               |             |             |             |
| O             | -1.46876800 | 2.75001600  | 1.29223800  |               |             |             |             |

### INT4c

|   |            |             |             |
|---|------------|-------------|-------------|
| C | 2.52895900 | 1.64704900  | 0.96213100  |
| C | 2.22930500 | 0.15177200  | 1.19294200  |
| C | 1.26340200 | 2.20202200  | 0.33290200  |
| H | 2.69732000 | 2.15326600  | 1.91838800  |
| H | 3.40707600 | 1.81341100  | 0.33080300  |
| H | 2.48650900 | -0.10859800 | 2.22852900  |
| O | 0.81047500 | 0.01527900  | 1.08867900  |
| N | 1.36671200 | 2.33489700  | -1.18801300 |

### INT5c

|   |             |             |             |
|---|-------------|-------------|-------------|
| C | -3.59740900 | -0.97728500 | 1.47510100  |
| C | -2.22781300 | -0.32654200 | 1.55445700  |
| C | -4.10435600 | -1.27215100 | 0.10592500  |
| H | -3.57095700 | -1.88496000 | 2.09536700  |
| H | -4.28815300 | -0.27362300 | 1.95834900  |
| H | -1.94774000 | -0.15554500 | 2.60077500  |
| O | -1.26482500 | -1.43222500 | 1.10164300  |
| N | -4.93289400 | -0.37482900 | -0.53589400 |
| C | -0.09812700 | -1.09657000 | 0.80871000  |
| N | 0.99764500  | -0.82904200 | 0.52887900  |
| C | -3.71636900 | -2.40499200 | -0.61438700 |
| N | -3.35582900 | -3.37479400 | -1.16855800 |
| O | -5.31570100 | -0.62459900 | -1.69954000 |
| O | -5.28785000 | 0.66227900  | 0.06235700  |
| C | -2.01109000 | 0.90212400  | 0.73403500  |
| C | -1.98087500 | 2.13264300  | 1.39262100  |

|    |             |             |             |    |             |             |             |
|----|-------------|-------------|-------------|----|-------------|-------------|-------------|
| C  | -1.88330600 | 0.86102200  | -0.65905200 | H  | -4.25893900 | 3.08104200  | 2.83770100  |
| C  | -1.85240400 | 3.31333900  | 0.66881600  | Cu | 3.07438200  | -0.52801200 | -0.36088900 |
| H  | -2.06707500 | 2.16136500  | 2.47890800  | O  | 4.46278000  | 0.88923800  | -0.71639600 |
| C  | -1.73720200 | 2.04248900  | -1.37779700 | N  | 5.20145600  | 0.44600300  | 0.23155000  |
| H  | -1.89260600 | -0.09229200 | -1.18771000 | O  | 6.24496200  | 0.94899000  | 0.53852900  |
| C  | -1.72871100 | 3.26945400  | -0.71705400 | O  | 4.71676000  | -0.58072900 | 0.81861500  |
| H  | -1.83698300 | 4.26869600  | 1.19041200  | N  | 1.26398000  | -1.10563500 | 1.38315900  |
| H  | -1.63544300 | 2.00297500  | -2.46092100 | O  | 1.52340200  | 0.10774200  | 1.41164000  |
| H  | -1.62001600 | 4.19241700  | -1.28432100 | O  | 1.96603500  | -1.84401900 | 0.57871700  |
| Cu | 2.64671700  | -0.11994700 | -0.21728900 | O  | 0.39157900  | -1.63446400 | 2.04738300  |
| O  | 2.54587400  | 1.76660400  | 0.44321100  |    |             |             |             |
| N  | 3.57142800  | 2.10642100  | -0.24925400 |    |             |             |             |
| O  | 4.02840200  | 3.21372300  | -0.23925700 |    |             |             |             |
| O  | 4.05418000  | 1.15036400  | -0.94349700 |    |             |             |             |
| N  | 4.14802300  | -2.15295000 | 0.05043400  |    |             |             |             |
| O  | 4.19886300  | -1.38330000 | 1.02885700  |    |             |             |             |
| O  | 3.36001200  | -1.79622600 | -0.92145200 |    |             |             |             |
| O  | 4.77248600  | -3.18479900 | -0.04444200 |    |             |             |             |

### TS1b

|   |             |             |             |
|---|-------------|-------------|-------------|
| C | -1.76833300 | -0.23826000 | -0.50011500 |
| C | -1.81645000 | -0.26965900 | -1.94676600 |
| C | -0.64986800 | 0.70665300  | -1.80136500 |
| H | -1.53369500 | -1.21828700 | -2.40425800 |
| H | -2.68104800 | 0.18224200  | -2.43103700 |
| C | 0.66141200  | 0.26642900  | -1.76356000 |
| N | 1.77010800  | -0.12206200 | -1.74518800 |
| C | -0.88556600 | 2.09960200  | -1.85769500 |
| N | -1.12274600 | 3.24136500  | -1.88651400 |
| H | -1.06218000 | -0.91781100 | -0.02526600 |
| N | -4.29132700 | -2.04717600 | -0.46047000 |
| O | -4.51647500 | -1.29179100 | -1.42501200 |
| O | -5.18018700 | -2.77543100 | 0.00517100  |
| O | -3.13640700 | -2.08164600 | 0.05681900  |
| C | -2.46148000 | 0.68846200  | 0.37392700  |
| C | -3.53865600 | 1.47279300  | -0.06538800 |
| C | -2.04108800 | 0.77455400  | 1.70987300  |
| C | -4.17924700 | 2.32607400  | 0.82200100  |
| H | -3.88580600 | 1.39927600  | -1.09380800 |
| C | -2.68289800 | 1.63292300  | 2.59036500  |
| H | -1.20391000 | 0.16009200  | 2.04597800  |
| C | -3.75293800 | 2.40858600  | 2.14684100  |
| H | -5.01911700 | 2.92872300  | 0.48122700  |
| H | -2.35158100 | 1.69755500  | 3.62504300  |

### TS2b

|    |             |             |             |
|----|-------------|-------------|-------------|
| C  | 1.89675800  | 0.69283900  | 0.99066400  |
| C  | 1.79931700  | -0.12870900 | -0.32944300 |
| C  | 1.06346100  | 1.92666800  | 0.75698600  |
| H  | 1.55026900  | 0.09183200  | 1.84075800  |
| H  | 2.92274900  | 1.02790600  | 1.19010900  |
| H  | 0.89458800  | -0.76755200 | -0.22655700 |
| O  | 1.66418200  | 0.71372300  | -1.40004100 |
| N  | 1.73796800  | 2.43117200  | -0.85708400 |
| C  | -0.31234400 | 1.63063600  | 0.52149000  |
| N  | -1.39430300 | 1.29879300  | 0.27065100  |
| C  | 1.29752200  | 3.06594600  | 1.59414500  |
| N  | 1.52605700  | 4.00511600  | 2.24100400  |
| O  | 0.92654100  | 3.04216200  | -1.53380400 |
| O  | 2.91684000  | 2.72789000  | -0.70313100 |
| C  | 2.99799400  | -1.05032000 | -0.40687800 |
| C  | 2.92559800  | -2.33304600 | 0.13422600  |
| C  | 4.19228800  | -0.61259200 | -0.97895500 |
| C  | 4.03869100  | -3.17030700 | 0.11433700  |
| H  | 1.98245700  | -2.67606000 | 0.56678400  |
| C  | 5.30480400  | -1.44771900 | -1.00129300 |
| H  | 4.22738200  | 0.39016800  | -1.40559200 |
| C  | 5.23141800  | -2.72806600 | -0.45255300 |
| H  | 3.97195700  | -4.17236300 | 0.53691900  |
| H  | 6.23552000  | -1.10078000 | -1.44949400 |
| H  | 6.10268500  | -3.38162600 | -0.47226000 |
| Cu | -2.83067600 | -0.04221600 | 0.27852800  |
| O  | -3.93906000 | 0.50581800  | -1.28668300 |
| N  | -4.77540300 | -0.44563800 | -1.07757300 |
| O  | -5.73032600 | -0.64102000 | -1.77186300 |
| O  | -4.48372400 | -1.15959700 | -0.05900500 |
| N  | -1.22578000 | -1.83169300 | 1.14391200  |
| O  | -1.30070100 | -1.83283700 | -0.09841400 |



|   |             |             |            |   |            |             |            |
|---|-------------|-------------|------------|---|------------|-------------|------------|
| O | -2.02154500 | -1.01467600 | 1.76970600 | H | 3.23872300 | 0.93602900  | 1.41707300 |
| O | -0.46856000 | -2.52439800 | 1.78814800 | H | 1.62224500 | -1.44336900 | 0.57530100 |

### TS3b

|               |             |             |             |               |             |             |             |
|---------------|-------------|-------------|-------------|---------------|-------------|-------------|-------------|
| C             | 1.54572000  | 0.64621200  | -1.20578200 | C             | -0.07693000 | 1.10723700  | 0.71591700  |
| C             | 3.10712300  | 0.87642500  | -1.12186000 | N             | -1.14918600 | 0.71478500  | 0.53760300  |
| C             | 1.00382100  | 1.65475100  | -0.20968200 | C             | 1.29907200  | 2.67490500  | 1.94869600  |
| H             | 1.12005500  | 0.87326000  | -2.19212400 | N             | 1.32832900  | 3.53172800  | 2.73029000  |
| H             | 1.21398400  | -0.35793200 | -0.91367400 | O             | 0.85299500  | 2.79949100  | -1.05203000 |
| H             | 3.41602200  | 1.15071800  | -2.16233800 | O             | 2.92908300  | 2.43063500  | -0.51473800 |
| O             | 3.34096200  | 1.85534400  | -0.22037400 | C             | 3.51175200  | -0.98166700 | -0.29181400 |
| N             | 1.36486000  | 1.22724400  | 1.25471300  | C             | 4.29481800  | -1.78211700 | 0.54298800  |
| C             | 1.57153400  | 2.99276900  | -0.42759500 | C             | 4.03349600  | -0.57022300 | -1.51608100 |
| N             | 1.55695900  | 4.14136900  | -0.66093900 | C             | 5.57930000  | -2.16122100 | 0.16358200  |
| C             | -0.45559300 | 1.61992000  | -0.21485400 | H             | 3.88809600  | -2.11587300 | 1.50120700  |
| N             | -1.60215800 | 1.48042400  | -0.15265400 | C             | 5.31715600  | -0.94836000 | -1.90177800 |
| O             | 1.43750000  | 2.11380800  | 2.07835000  | H             | 3.40209600  | 0.05162000  | -2.15009300 |
| O             | 1.40928500  | 0.03273600  | 1.46401600  | C             | 6.09519800  | -1.74389500 | -1.06301800 |
| C             | 3.79947200  | -0.44535500 | -0.81746400 | H             | 6.18035400  | -2.78691100 | 0.82328000  |
| C             | 3.75816100  | -1.49452600 | -1.73909900 | H             | 5.71482000  | -0.62014900 | -2.86237200 |
| C             | 4.48786600  | -0.62601800 | 0.37961300  | H             | 7.09920800  | -2.04108300 | -1.36423900 |
| C             | 4.38742100  | -2.70527800 | -1.46715000 | Cu-2.90170200 | -0.06168200 | 0.20051500  |             |
| H             | 3.22707300  | -1.35455600 | -2.68409700 | O             | -3.42482600 | 0.91638500  | -1.46193700 |
| C             | 5.11993400  | -1.83648900 | 0.65713800  | N             | -4.61493300 | 0.43725000  | -1.41726400 |
| H             | 4.51519200  | 0.20552900  | 1.08286700  | O             | -5.44717900 | 0.68093600  | -2.24332800 |
| C             | 5.07056100  | -2.88029300 | -0.26370300 | O             | -4.81934600 | -0.32078400 | -0.41099900 |
| H             | 4.34692900  | -3.51536600 | -2.19506600 | N             | -2.43675100 | -2.43475800 | 0.96163700  |
| H             | 5.65321700  | -1.96733500 | 1.59884800  | O             | -2.27193500 | -2.26973700 | -0.26248500 |
| H             | 5.56544000  | -3.82673000 | -0.04820600 | O             | -2.82176500 | -1.38872800 | 1.63338200  |
| Cu-3.06625000 | 0.16491400  | 0.17701300  |             | O             | -2.26403100 | -3.48095100 | 1.54338200  |
| O             | -3.99059100 | 0.16316400  | -1.58234400 |               |             |             |             |
| N             | -4.86330100 | -0.68910000 | -1.17639900 |               |             |             |             |
| O             | -5.73184900 | -1.11564400 | -1.88078300 |               |             |             |             |
| O             | -4.70744800 | -1.03285500 | 0.04220400  |               |             |             |             |
| N             | -1.57449000 | -1.39229200 | 1.51684600  |               |             |             |             |
| O             | -1.52576700 | -1.60568900 | 0.28992600  |               |             |             |             |
| O             | -2.34128800 | -0.40599600 | 1.89415200  |               |             |             |             |
| O             | -0.97653800 | -2.02690600 | 2.35136400  |               |             |             |             |

### TS3c

|   |            |             |            |  |  |  |  |
|---|------------|-------------|------------|--|--|--|--|
| C | 2.24296600 | 0.48606000  | 1.31630200 |  |  |  |  |
| C | 2.11432300 | -0.54042700 | 0.12614400 |  |  |  |  |
| C | 1.28305500 | 1.60519900  | 0.94197400 |  |  |  |  |
| H | 1.95664500 | 0.07811600  | 2.29402600 |  |  |  |  |

### TS4b

|   |             |             |             |  |  |  |  |
|---|-------------|-------------|-------------|--|--|--|--|
| C | -1.95378600 | -0.61960300 | 0.34785900  |  |  |  |  |
| C | -3.02324200 | -1.64872700 | 0.64080400  |  |  |  |  |
| C | -0.99378600 | -1.22471600 | -0.63994800 |  |  |  |  |
| H | -1.41772700 | -0.44118500 | 1.29086000  |  |  |  |  |
| H | -2.82342000 | -2.46263600 | 1.32688000  |  |  |  |  |
| H | -4.00507300 | -1.59120700 | 0.18331400  |  |  |  |  |
| O | -3.74550400 | -0.64770700 | 2.21941800  |  |  |  |  |
| N | -1.37062300 | -2.39338600 | -1.23947600 |  |  |  |  |
| C | 0.18358800  | -0.62925100 | -1.02334500 |  |  |  |  |
| N | 1.15753000  | -0.04349200 | -1.32576200 |  |  |  |  |
| C | -4.67802800 | 0.11892400  | 1.93827900  |  |  |  |  |
| N | -5.56974700 | 0.85138000  | 1.67402500  |  |  |  |  |

|    |             |             |             |    |             |             |             |
|----|-------------|-------------|-------------|----|-------------|-------------|-------------|
| O  | -0.70364900 | -2.96470600 | -2.09702600 | H  | -1.15596900 | -1.57706900 | -0.99477800 |
| O  | -2.49050800 | -2.86423700 | -0.84537400 | C  | -3.41159500 | -2.93737000 | 1.14553300  |
| C  | -2.52017600 | 0.69581700  | -0.14210500 | H  | -5.30532900 | -2.04964600 | 1.67584300  |
| C  | -2.22568400 | 1.87348400  | 0.54137300  | H  | -1.48211800 | -3.56409300 | 0.40910300  |
| C  | -3.34173100 | 0.74122300  | -1.27036300 | H  | -3.56534500 | -3.82851000 | 1.75185000  |
| C  | -2.76545700 | 3.08529300  | 0.11766500  | Cu | 2.20912400  | -0.15185100 | -0.49095300 |
| H  | -1.58519100 | 1.83442400  | 1.42364700  | O  | 3.28170700  | 1.11113800  | 0.67205700  |
| C  | -3.88528800 | 1.94952500  | -1.69078800 | N  | 4.27254700  | 0.30320800  | 0.68864100  |
| H  | -3.56576100 | -0.17575200 | -1.81967900 | O  | 5.28720900  | 0.51980500  | 1.29212200  |
| C  | -3.60177400 | 3.12315600  | -0.99381100 | O  | 4.07888500  | -0.75819500 | 0.00392000  |
| H  | -2.53644800 | 3.99986200  | 0.66262400  | N  | 1.20130500  | -2.51219000 | -0.37977700 |
| H  | -4.53342800 | 1.97561500  | -2.56542000 | O  | 1.26713000  | -1.99292000 | 0.74617500  |
| H  | -4.03018200 | 4.06860600  | -1.32308700 | O  | 1.61647600  | -1.79630900 | -1.38197900 |
| Cu | 2.88609600  | 0.15934500  | -0.44483100 | O  | 0.77110600  | -3.62736400 | -0.59886000 |
| O  | 2.91403500  | 2.16378100  | -0.24498600 |    |             |             |             |
| N  | 4.09346700  | 2.13415200  | 0.25297000  |    |             |             |             |

### TS5b

|   |            |             |             |   |            |             |             |
|---|------------|-------------|-------------|---|------------|-------------|-------------|
| O | 4.67198000 | 3.11784200  | 0.62155400  | C | 2.76956300 | -0.90362200 | -0.13581400 |
| O | 4.59103800 | 0.95977000  | 0.32103100  | C | 2.49510600 | -0.88859400 | -1.61768600 |
| N | 2.68165300 | -1.90838300 | 1.05055200  | C | 4.15119600 | -0.36830100 | 0.12852800  |
| O | 2.17200700 | -0.90282500 | 1.57816900  | H | 2.76533300 | -1.96209400 | 0.16645600  |
| O | 3.23096300 | -1.73744000 | -0.11716600 | H | 3.12458200 | -1.48051400 | -2.27537600 |
| O | 2.69547100 | -3.01215000 | 1.54951600  | H | 1.93076800 | -0.08280700 | -2.07675600 |

### TS4c

|   |             |             |             |    |             |             |             |
|---|-------------|-------------|-------------|----|-------------|-------------|-------------|
| C | -2.98151000 | 1.95825300  | -0.44033300 | C  | 4.80491000  | -0.58006700 | 1.34696700  |
| C | -2.84235400 | 0.62644900  | -1.20379200 | N  | 5.31147100  | -0.79274800 | 2.38061400  |
| C | -1.67012300 | 2.43443200  | 0.08363400  | C  | 0.01977400  | -1.56119000 | -1.47961400 |
| H | -3.36968200 | 2.71143600  | -1.13599600 | N  | -1.04896000 | -1.08031400 | -1.36452400 |
| H | -3.71812200 | 1.84022100  | 0.36379300  | O  | 5.81016500  | 1.01653500  | -0.58698200 |
| H | -3.53274100 | 0.61325500  | -2.05449600 | O  | 4.07266900  | 0.64700200  | -1.86809200 |
| O | -1.53393700 | 0.63593800  | -1.86753300 | C  | 1.68703900  | -0.18656700 | 0.64845000  |
| N | -1.18410500 | 1.97437000  | 1.31396300  | C  | 0.93483800  | -0.88097700 | 1.59512600  |
| C | -0.49776600 | 0.91068800  | -1.16736600 | C  | 1.42748900  | 1.16926000  | 0.42399500  |
| N | 0.63838100  | 0.88751100  | -0.85453500 | C  | -0.07681100 | -0.23526900 | 2.30395000  |
| C | -1.07429400 | 3.61678900  | -0.39944400 | H  | 1.13803600  | -1.93837400 | 1.77109800  |
| N | -0.59396200 | 4.57966000  | -0.85724900 | C  | 0.41664800  | 1.81397100  | 1.12702300  |
| O | -0.14705800 | 2.48183300  | 1.76503800  | H  | 2.01816000  | 1.71977700  | -0.31032600 |
| O | -1.77381800 | 1.03451000  | 1.86509000  | C  | -0.33949100 | 1.11264900  | 2.06957700  |
| C | -3.00418900 | -0.63250200 | -0.39148800 | H  | -0.66118900 | -0.78606200 | 3.03952200  |
| C | -4.18158500 | -0.79622200 | 0.34419900  | H  | 0.21689100  | 2.86965300  | 0.94467500  |
| C | -2.05315200 | -1.65127300 | -0.38022700 | H  | -1.12492300 | 1.62146800  | 2.62680400  |
| C | -4.38396400 | -1.93955600 | 1.10595000  | Cu | -2.19018800 | 0.02858700  | -0.26411800 |
| H | -4.94893000 | -0.02189800 | 0.32168800  | O  | -1.91999400 | 1.79270500  | -1.19717400 |
| C | -2.25065700 | -2.79225700 | 0.39585200  | N  | -2.66278800 | 2.39811000  | -0.34899400 |

|   |             |             |             |   |             |             |             |
|---|-------------|-------------|-------------|---|-------------|-------------|-------------|
| O | -2.86383800 | 3.58157100  | -0.38376000 | C | -4.26178800 | -0.23842600 | -1.16489500 |
| O | -3.16024000 | 1.62778300  | 0.53695900  | H | -4.93948100 | -0.28895600 | -0.30667800 |
| N | -4.04590900 | -1.67424300 | 0.22784800  | H | -4.66573800 | 0.43462100  | -1.92319900 |
| O | -4.28182500 | -1.02115300 | -0.80379000 | H | -4.12209200 | -1.24027900 | -1.58389200 |
| O | -2.94915200 | -1.38447100 | 0.86307000  |   |             |             |             |
| O | -4.76529100 | -2.54769300 | 0.66504500  |   |             |             |             |

### **Cu(NO<sub>3</sub>)<sub>2</sub>(OCN)<sup>-</sup>**

|    |             |             |             |
|----|-------------|-------------|-------------|
| O  | 2.75296000  | -2.91495500 | 0.13737100  |
| C  | 1.69633300  | -2.37423000 | 0.06487100  |
| N  | 0.58929100  | -1.90091100 | -0.00190400 |
| Cu | 0.07108400  | -0.09244900 | -0.24614900 |
| O  | 1.71711700  | 0.90395600  | 0.40119100  |
| N  | 1.22318600  | 2.02734500  | 0.03953900  |
| O  | 1.79095600  | 3.07388900  | 0.20414500  |
| O  | 0.07548100  | 1.93300600  | -0.50823500 |
| N  | -2.46917500 | -0.25387700 | 0.17297700  |
| O  | -1.76139600 | -0.41443200 | -0.90039000 |
| O  | -1.85712500 | 0.05331000  | 1.21199600  |
| O  | -3.67331300 | -0.40746000 | 0.11327300  |

### **1v**

|   |             |             |             |
|---|-------------|-------------|-------------|
| C | 0.11506200  | -0.67420700 | 0.85346000  |
| C | -0.52514800 | 0.11900000  | 1.91419300  |
| C | -1.04113100 | 0.30602100  | 0.49601600  |
| H | -0.23123900 | -1.70454200 | 0.76597200  |
| H | 0.01098400  | 0.96523100  | 2.33958400  |
| H | -1.21749300 | -0.38431700 | 2.58526100  |
| C | -0.69760300 | 1.51840600  | -0.18621000 |
| N | -0.38625300 | 2.49931600  | -0.72737400 |
| C | 1.48784000  | -0.44400400 | 0.33896300  |
| C | 2.04090300  | -1.40746500 | -0.51049900 |
| C | 2.24408300  | 0.68853300  | 0.65727300  |
| C | 3.31850400  | -1.24529700 | -1.03385700 |
| H | 1.45625800  | -2.29373600 | -0.75889700 |
| C | 3.52143100  | 0.85186300  | 0.13121400  |
| H | 1.84158500  | 1.45169400  | 1.32351500  |
| C | 4.06264100  | -0.11208300 | -0.71535600 |
| H | 3.73355900  | -2.00625300 | -1.69299000 |
| H | 4.09876700  | 1.73838200  | 0.38949600  |
| H | 5.06352400  | 0.01852600  | -1.12396900 |
| C | -2.34239600 | -0.34439700 | 0.16690200  |
| O | -2.73003800 | -1.35920000 | 0.70018200  |
| O | -3.00236800 | 0.32254300  | -0.77590900 |

### **TS1v**

|   |             |             |             |
|---|-------------|-------------|-------------|
| C | 0.23738800  | 0.43080600  | -0.37738300 |
| C | -0.61618300 | 0.47470300  | -1.56274000 |
| C | -1.74763200 | -0.20731900 | -0.82707100 |
| H | -0.87899000 | 1.49464600  | -1.85673200 |
| H | -0.25205300 | -0.08841500 | -2.42729800 |
| C | -1.90004100 | -1.59377400 | -0.91848000 |
| N | -1.98545000 | -2.76031100 | -1.01958000 |
| H | -0.01740500 | 1.13925500  | 0.40766400  |
| N | 2.26081900  | 2.41711900  | -0.09307600 |
| O | 1.72224200  | 2.48041500  | 1.01945200  |
| O | 3.24652200  | 3.09271100  | -0.39105900 |
| O | 1.78813800  | 1.62470900  | -0.98672200 |
| C | 1.02783600  | -0.72783100 | 0.02693700  |
| C | 1.38066800  | -1.74432500 | -0.87107300 |
| C | 1.48127300  | -0.80116200 | 1.35171800  |
| C | 2.16044500  | -2.81298000 | -0.44840500 |
| H | 1.04884000  | -1.69927000 | -1.90726200 |
| C | 2.26380200  | -1.86869100 | 1.77060000  |
| H | 1.21622100  | -0.00414900 | 2.04531100  |
| C | 2.60319100  | -2.87806000 | 0.87164000  |
| H | 2.42710300  | -3.59877500 | -1.15304800 |
| H | 2.60931800  | -1.91598500 | 2.80193700  |
| H | 3.21481900  | -3.71740200 | 1.19908200  |
| C | -2.63898500 | 0.60744700  | -0.04865300 |
| O | -2.54535600 | 1.82069300  | 0.09012400  |
| O | -3.62719700 | -0.11348500 | 0.54155500  |
| C | -4.52810100 | 0.63770700  | 1.33959800  |
| H | -5.06205400 | 1.38749600  | 0.74323100  |
| H | -5.24341400 | -0.08099600 | 1.74924100  |
| H | -4.00673700 | 1.14647600  | 2.15953400  |

### **INT1v**

|   |             |             |             |
|---|-------------|-------------|-------------|
| C | -0.62178100 | -0.25150400 | 0.91460300  |
| C | 0.31285000  | -0.19571900 | -0.28961800 |
| C | -2.03472600 | 0.16667200  | 0.60733100  |
| H | -0.60741900 | -1.29678000 | 1.25402300  |
| H | -0.21150300 | 0.34731300  | 1.73824800  |
| H | -0.11745600 | -0.84908200 | -1.06358300 |

|   |             |             |             |   |             |             |             |
|---|-------------|-------------|-------------|---|-------------|-------------|-------------|
| O | 0.21368800  | 1.07554500  | -1.02028900 | H | -2.10746000 | -1.21765300 | -1.37848000 |
| N | 0.69379400  | 2.19640200  | -0.38750000 | C | -4.83520900 | 0.07550000  | 0.20875200  |
| C | -2.37431200 | 1.50979600  | 0.75805900  | H | -4.79088600 | 1.78865500  | 1.51830200  |
| N | -2.61117700 | 2.65439000  | 0.90942300  | H | -4.56742900 | -1.58462200 | -1.13766500 |
| O | 0.58565800  | 3.19335600  | -1.05648400 | H | -5.90763600 | -0.08167600 | 0.31783000  |
| O | 1.16175700  | 2.08602700  | 0.72023800  | C | 2.56074100  | 0.53807500  | 0.26315900  |
| C | 1.75705800  | -0.57883000 | -0.07778100 | O | 3.71088800  | 0.17423800  | 0.10757200  |
| C | 2.22392800  | -1.04600800 | 1.15074500  | O | 2.14127200  | 1.78648300  | -0.00384200 |
| C | 2.64701200  | -0.49757000 | -1.15359800 | C | 3.13049000  | 2.65669200  | -0.54165000 |
| C | 3.55577400  | -1.42410300 | 1.30218800  | H | 2.63945700  | 3.62187500  | -0.68745700 |
| H | 1.54793600  | -1.11345300 | 2.00152600  | H | 3.97308000  | 2.76872500  | 0.14995600  |
| C | 3.97873000  | -0.86450300 | -1.00056700 | H | 3.50339100  | 2.27985100  | -1.50099200 |

### INT1w

|   |             |             |             |    |             |             |             |
|---|-------------|-------------|-------------|----|-------------|-------------|-------------|
| H | 3.90619200  | -1.78735400 | 2.26729400  | Cu | 2.79408900  | -0.03877900 | -0.51039300 |
| H | 4.66065000  | -0.79161200 | -1.84662100 | O  | 3.79013600  | 1.36356200  | 0.49143200  |
| H | 5.47950800  | -1.62309100 | 0.34988600  | N  | 4.62001500  | 0.50235000  | 0.95908300  |
| C | -2.99761800 | -0.70210500 | 0.02858800  | O  | 5.50442800  | 0.79081200  | 1.71180900  |
| C | -3.40515800 | -2.90583000 | -0.69018600 | O  | 4.40267100  | -0.68568100 | 0.54394400  |
| H | -2.86555000 | -3.85508500 | -0.76929300 | C  | -1.92571400 | -0.20207300 | -1.42147900 |
| H | -4.28022100 | -3.03749500 | -0.04041400 | C  | -2.10894500 | 0.95314400  | -2.30810600 |
| H | -3.75900700 | -2.60462200 | -1.68485000 | C  | -1.21923900 | 1.16624300  | -1.09337600 |
| O | -4.15716900 | -0.44256600 | -0.29042600 | H  | -1.60352500 | 0.94802600  | -3.27064400 |
| O | -2.49099500 | -1.97217900 | -0.15505500 | H  | -3.04270400 | 1.50977100  | -2.26933100 |

### TS2v

|   |             |             |             |   |             |             |             |
|---|-------------|-------------|-------------|---|-------------|-------------|-------------|
| C | 0.13347600  | 0.21925300  | 1.10686200  | C | 0.19249800  | 1.12931900  | -1.22203500 |
| C | -0.58757800 | 0.70806200  | -0.19192100 | N | 1.34948400  | 1.05489900  | -1.29833700 |
| C | 1.46946700  | -0.32914500 | 0.72382000  | H | -1.20656400 | -0.94690700 | -1.76935600 |
| H | 0.19116200  | 1.05038700  | 1.82146600  | N | 1.19238800  | -2.01136600 | -0.16772100 |
| H | -0.45102700 | -0.58071600 | 1.57801400  | O | 1.13663500  | -1.20736400 | 0.78149600  |
| H | -0.40775800 | 1.79547500  | -0.25920100 | O | 2.05748900  | -1.74517400 | -1.10355800 |
| O | -0.00959600 | 0.13960700  | -1.31496900 | O | 0.49870400  | -2.99883800 | -0.27174100 |
| N | 0.82813500  | -1.19376100 | -0.93032700 | C | -2.93658300 | -0.69821800 | -0.45023300 |
| C | 1.93336700  | -1.47335800 | 1.42728900  | C | -4.30473900 | -0.56948600 | -0.68883500 |
| N | 2.28280700  | -2.43582500 | 1.98760400  | C | -2.49506000 | -1.29213800 | 0.73652400  |
| O | 1.73349700  | -1.32040300 | -1.74403800 | C | -5.22362100 | -1.02665100 | 0.25076100  |
| O | 0.07303800  | -2.09801700 | -0.55916900 | H | -4.65052000 | -0.10685800 | -1.61281700 |
| C | -2.07885300 | 0.48128100  | -0.07966300 | C | -3.41495400 | -1.74454300 | 1.67606600  |
| C | -2.83953500 | 1.32421800  | 0.73390700  | H | -1.42261700 | -1.39074900 | 0.92280600  |
| C | -2.71151600 | -0.56467100 | -0.75121500 | C | -4.78113300 | -1.61058200 | 1.43500300  |
| C | -4.20883800 | 1.12285800  | 0.88166700  | H | -6.29022200 | -0.92330900 | 0.05753700  |
| H | -2.34920100 | 2.15082500  | 1.25314400  | H | -3.06386000 | -2.19994700 | 2.60062700  |
| C | -4.08186000 | -0.76531400 | -0.60772200 | H | -5.50144700 | -1.96473500 | 2.17081900  |
|   |             |             |             | C | -1.67894200 | 1.87491500  | 0.14105200  |
|   |             |             |             | O | -0.95360000 | 2.08409500  | 1.08680000  |

|   |             |            |            |   |             |            |             |
|---|-------------|------------|------------|---|-------------|------------|-------------|
| O | -2.96777000 | 2.17084600 | 0.07478300 | H | -3.30587300 | 4.21874000 | -0.32230000 |
| C | -3.58386100 | 2.56000700 | 1.30845300 | H | -1.90541000 | 4.01577100 | 0.77754400  |
| H | -3.18760500 | 3.52108600 | 1.65125600 |   |             |            |             |
| H | -4.65054900 | 2.64441500 | 1.09253000 |   |             |            |             |
| H | -3.40995100 | 1.79491500 | 2.07429600 |   |             |            |             |

### INT2w

|    |             |             |             |
|----|-------------|-------------|-------------|
| C  | -1.89387300 | -0.79110800 | -0.50266200 |
| C  | -1.68765200 | 0.14451800  | -1.69301700 |
| C  | -0.53454000 | 1.08168200  | -1.43748200 |
| H  | -1.47730200 | -0.48702600 | -2.56802700 |
| H  | -2.58473800 | 0.72538000  | -1.92168100 |
| C  | 0.74353500  | 0.65903400  | -1.62139800 |
| N  | 1.85810700  | 0.30667000  | -1.86356400 |
| H  | -0.93238900 | -1.28896700 | -0.31681700 |
| N  | -3.96304100 | -1.86517000 | -1.23205700 |
| O  | -4.43347800 | -0.75487800 | -1.30264800 |
| O  | -4.50457500 | -2.91932900 | -1.44944800 |
| O  | -2.64881000 | -2.00715400 | -0.86681700 |
| C  | -2.36794000 | -0.21354400 | 0.80686800  |
| C  | -3.27227000 | 0.84845700  | 0.90517500  |
| C  | -1.86913900 | -0.78756200 | 1.98086100  |
| C  | -3.65758200 | 1.32985400  | 2.15222000  |
| H  | -3.67180300 | 1.31523900  | 0.00925700  |
| C  | -2.26170100 | -0.31216500 | 3.22778100  |
| H  | -1.14965300 | -1.60470900 | 1.90860500  |
| C  | -3.15580400 | 0.75097800  | 3.31547000  |
| H  | -4.35675200 | 2.16308200  | 2.21321800  |
| H  | -1.85991400 | -0.76689300 | 4.13206600  |
| H  | -3.46060800 | 1.13119100  | 4.28951000  |
| Cu | 3.03102600  | -0.43011100 | -0.53917100 |
| O  | 4.25460100  | 1.17643600  | -0.19019900 |
| N  | 5.01421800  | 0.48135200  | 0.56591900  |
| O  | 5.98033200  | 0.94324300  | 1.11822500  |
| O  | 4.66329200  | -0.73744900 | 0.68633400  |
| N  | 1.35546400  | -2.03960200 | 0.60118400  |
| O  | 1.39735100  | -0.93751000 | 1.17714600  |
| O  | 2.16149200  | -2.22229600 | -0.38901500 |
| O  | 0.58822800  | -2.93661900 | 0.91610000  |
| C  | -0.67849400 | 2.43184700  | -0.91703300 |
| O  | 0.23045400  | 3.13490900  | -0.50542800 |
| O  | -1.96190600 | 2.84579900  | -0.94233600 |
| C  | -2.22359800 | 4.07127300  | -0.27065000 |
| H  | -1.71003900 | 4.90787100  | -0.75788600 |

### TS1w

|    |             |             |             |
|----|-------------|-------------|-------------|
| C  | -1.89317200 | 0.76115200  | -0.29569100 |
| C  | -1.22953800 | 0.44949400  | 0.95924400  |
| C  | -0.61351600 | -0.70333300 | 0.18213200  |
| H  | -0.49838200 | 1.18820000  | 1.29387200  |
| H  | -1.86598700 | 0.11123300  | 1.77561100  |
| C  | 0.56496900  | -0.49557700 | -0.49945200 |
| N  | 1.55415000  | -0.26971900 | -1.10098900 |
| H  | -1.29690800 | 1.27575600  | -1.04685600 |
| N  | -3.22287300 | 3.16058300  | 1.08695400  |
| O  | -3.22707100 | 2.32953500  | 2.01221900  |
| O  | -3.77296600 | 4.26271100  | 1.20596000  |
| O  | -2.64162000 | 2.88667100  | -0.00814800 |
| C  | -3.16169500 | 0.20270600  | -0.74009500 |
| C  | -4.18494700 | -0.11549500 | 0.16449000  |
| C  | -3.35168100 | -0.02919300 | -2.10888600 |
| C  | -5.37475400 | -0.65833300 | -0.29998100 |
| H  | -4.05287500 | 0.10317100  | 1.22233900  |
| C  | -4.53586600 | -0.59127400 | -2.56680800 |
| H  | -2.55147400 | 0.22141300  | -2.80554700 |
| C  | -5.54792600 | -0.90627300 | -1.66193300 |
| H  | -6.17295800 | -0.89228900 | 0.40234200  |
| H  | -4.67273900 | -0.78098900 | -3.62987500 |
| H  | -6.47997800 | -1.34030000 | -2.02068000 |
| Cu | 3.39656000  | -0.21299500 | -0.49495700 |
| O  | 4.04259400  | 1.40331300  | -1.53275100 |
| N  | 5.22960200  | 1.25989900  | -1.07820700 |
| O  | 6.12921000  | 2.00707000  | -1.34938500 |
| O  | 5.36610700  | 0.25040700  | -0.30780900 |
| N  | 2.94014900  | -0.98350300 | 1.91651200  |
| O  | 2.83341600  | 0.25075500  | 1.80654400  |
| O  | 3.26988800  | -1.63992600 | 0.84275700  |
| O  | 2.75578100  | -1.59794300 | 2.94571600  |
| C  | -1.17805800 | -2.04891500 | 0.10412100  |
| O  | -0.77032900 | -2.92707200 | -0.63354400 |
| O  | -2.21952700 | -2.19486900 | 0.93404000  |
| C  | -2.98757300 | -3.38186200 | 0.75052000  |
| H  | -2.38857500 | -4.27345100 | 0.96425500  |
| H  | -3.82022300 | -3.31367400 | 1.45470000  |
| H  | -3.36866200 | -3.43682800 | -0.27706400 |

### TS2w

|    |             |             |             |
|----|-------------|-------------|-------------|
| C  | -1.80480400 | 0.30550700  | -0.68976400 |
| C  | -1.57142000 | -0.73812800 | 0.43912400  |
| C  | -1.09916100 | 1.55098300  | -0.26009300 |
| H  | -1.44427200 | -0.10327300 | -1.64379000 |
| H  | -2.86841300 | 0.54799300  | -0.79704800 |
| H  | -0.60078000 | -1.23150900 | 0.21605300  |
| O  | -1.49843300 | -0.11374000 | 1.66392500  |
| N  | -1.75502600 | 1.59925000  | 1.51453000  |
| C  | 0.29413000  | 1.38766100  | -0.08192000 |
| N  | 1.41395000  | 1.14818300  | 0.11894300  |
| O  | -0.97319300 | 2.15018100  | 2.27353900  |
| O  | -2.96092300 | 1.81421800  | 1.45080400  |
| C  | -2.64838200 | -1.79727800 | 0.36771800  |
| C  | -2.44741300 | -2.94589400 | -0.39687900 |
| C  | -3.86149200 | -1.61961300 | 1.03316500  |
| C  | -3.45046900 | -3.90704700 | -0.50175100 |
| H  | -1.48989800 | -3.08471200 | -0.90610800 |
| C  | -4.86372100 | -2.57852000 | 0.93041400  |
| H  | -3.99925700 | -0.72075200 | 1.63419500  |
| C  | -4.66092500 | -3.72541900 | 0.16277900  |
| H  | -3.28293200 | -4.80375100 | -1.09744100 |
| H  | -5.80889800 | -2.43465200 | 1.45343300  |
| H  | -5.44472400 | -4.47800800 | 0.08584100  |
| Cu | 2.99127700  | 0.05989900  | -0.25016200 |
| O  | 4.09934900  | 0.33217600  | 1.39317200  |
| N  | 5.07335500  | -0.33187800 | 0.88899400  |
| O  | 6.09963900  | -0.53341900 | 1.47216100  |
| O  | 4.83849100  | -0.75673900 | -0.29358900 |
| N  | 1.57352600  | -1.71227900 | -1.42392200 |
| O  | 1.73427600  | -1.96781600 | -0.21622000 |
| O  | 2.22176900  | -0.68583600 | -1.88989100 |
| O  | 0.85995500  | -2.34717000 | -2.17034200 |
| C  | -1.46526100 | 2.90521400  | -0.72679800 |
| O  | -0.76552900 | 3.88192400  | -0.54420400 |
| O  | -2.65657000 | 2.92937300  | -1.32106500 |
| C  | -3.12021800 | 4.22716500  | -1.69829500 |
| H  | -4.10772100 | 4.07668400  | -2.13913600 |
| H  | -3.19230400 | 4.87950300  | -0.82153900 |
| H  | -2.44430000 | 4.67946500  | -2.43209900 |

## 10. References

- [1] (a) S. Lin, M. Li, Z. Dong, F. Liang and J. Zhang, *Org. Biomol. Chem.*, 2014, **12**, 1341; (b) H. Liu, B. Moku, F. Li, J. Ran, J. Han, S. Long, G. Zha and H. Qin, *Adv. Synth. Catal.*, 2019, **361**, 4596; (c) A. P. Dieskau, M. S. Holzwarth and B. Plietker, *J. Am. Chem. Soc.*, 2012, **134**, 5048; (d) D. Pursley and B. Plietker, *Synlett*, 2014, **25**, 2316; (e) L. You, L. Bin and G. Qing, *Tetrahedron*, 1995, **51**, 9671; (f) L. Hao., M. Balakrishna., L. Fei., R. Jia., H. Jin., L. Si., Z. Gao and Q. Hua. *Adv. Synth. Catal.*, 2019, **361**, 4596; (g) M.-S. Liu, H.-W. Du, J.-F. Cui and W. Shu, *Angew. Chem., Int. Ed.*, 2022, **61**, e202209929.
- [2] (a) T. D. Zheved' and K.V. Altukhov, *Zh. Org. Khim.*, 1976, **12**, 2028; (b) P. E. O'Bannon and W. P. Dailey, *Tetrahedron*, 1990, **46**, 7341; (c) I. G. Pak and A. G. Tyrkov, *Russ. J. Org. Chem.*, 2011, **47**, 1908.
- [3] B. Zarranz, A. Jaso, I. Aldana, A. Monge, S. Maurel, E. Deharo, V. Jullian and M. Sauvain, *Arzneim.-Forsch.*, 2005, **55**, 754.
- [4] T. Shimizu, Y. Hayashi, T. Taniguchi and K. Teramura, *Tetrahedron*, 1985, **41**, 727.
- [5] Y. Hu, Q. Xia, S. Shanguan, X. Liu, Y. Hu and R. Sheng, *Molecules*, 2012, **17**, 9683.
- [6] M. J. Frisch, G. W. Trucks, H. B. Schlegel, G. E. Scuseria, M. A. Robb, J. R. Cheeseman, G. Scalmani, V. Barone, B. Mennucci, G. A. Petersson, H. Nakatsuji, M. Caricato, X. Li, H. P. Hratchian, A. F. Izmaylov, J. Bloino, G. Zheng, J. L. Sonnenberg, M. Hada, M. Ehara, K. Toyota, R. Fukuda, J. Hasegawa, M. Ishida, T. Nakajima, Y. Honda, O. Kitao, H. Nakai, T. Vreven, J. A. Montgomery, Jr., J. E. Peralta, F. Ogliaro, M. Bearpark, J. J. Heyd, E. Brothers, K. N. Kudin, V. N. Staroverov, R. Kobayashi, J. Normand, K. Raghavachari, A. Rendell, J. C. Burant, S. S. Iyengar, J. Tomasi, M. Cossi, N. Rega, J. M. Millam, M. Klene, J. E. Knox, J. B. Cross, V. Bakken, C. Adamo, J. Jaramillo, R. Gomperts, R. E. Stratmann, O. Yazyev, A. J. Austin, R. Cammi, C. Pomelli, J. W. Ochterski, R. L. Martin, K. Morokuma, V. G. Zakrzewski, G. A. Voth, P. Salvador, J. J. Dannenberg, S. Dapprich, A. D. Daniels, Ö. Farkas, J. B. Foresman, J. V. Ortiz, J. Cioslowski and D. J. Fox, *Gaussian 09*, Revision A.01, Gaussian, Inc., Wallingford CT, 2009.
- [7] Y. Zhao and D. G. Truhlar, *Theor. Chem. Acc.*, 2008, **120**, 215.
- [8] S. Grimme, J. Antony, S. Ehrlich and H. Krieg, *J. Chem. Phys.*, 2010, **132**, 154104.
- [9] (a) J. P. Hay and W. R. Wadt, *J. Chem. Phys.*, 1985, **82**, 299; (b) R. A. Friesner, R. B. Murphy, M. D. Beachy, M. N. Ringlanda, W. T. Pollard, B. D. Dunietz and Y. X. Cao, *J. Phys. Chem. A*, 1999, **103**, 1913.
- [10] A. V. Marenich, C. J. Cramer and D. G. Truhlar, *J. Phys. Chem. B*, 2009, **113**, 6378.
- [11] (a) K. Fukui, *J. Phys. Chem.*, 1970, **74**, 4161; (b) C. Gonzalez and H. B. Schlegel, *J. Chem. Phys.*, 1989, **90**, 2154; (c) C. Gonzalez and H. B. Schlegel, *J. Phys. Chem.*, 1990, **94**, 5523.

## 11. Copies of $^1\text{H}$ , $^{13}\text{C}$ and $^{19}\text{F}$ NMR Spectra

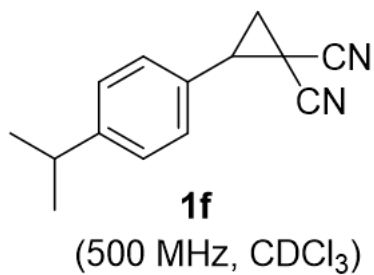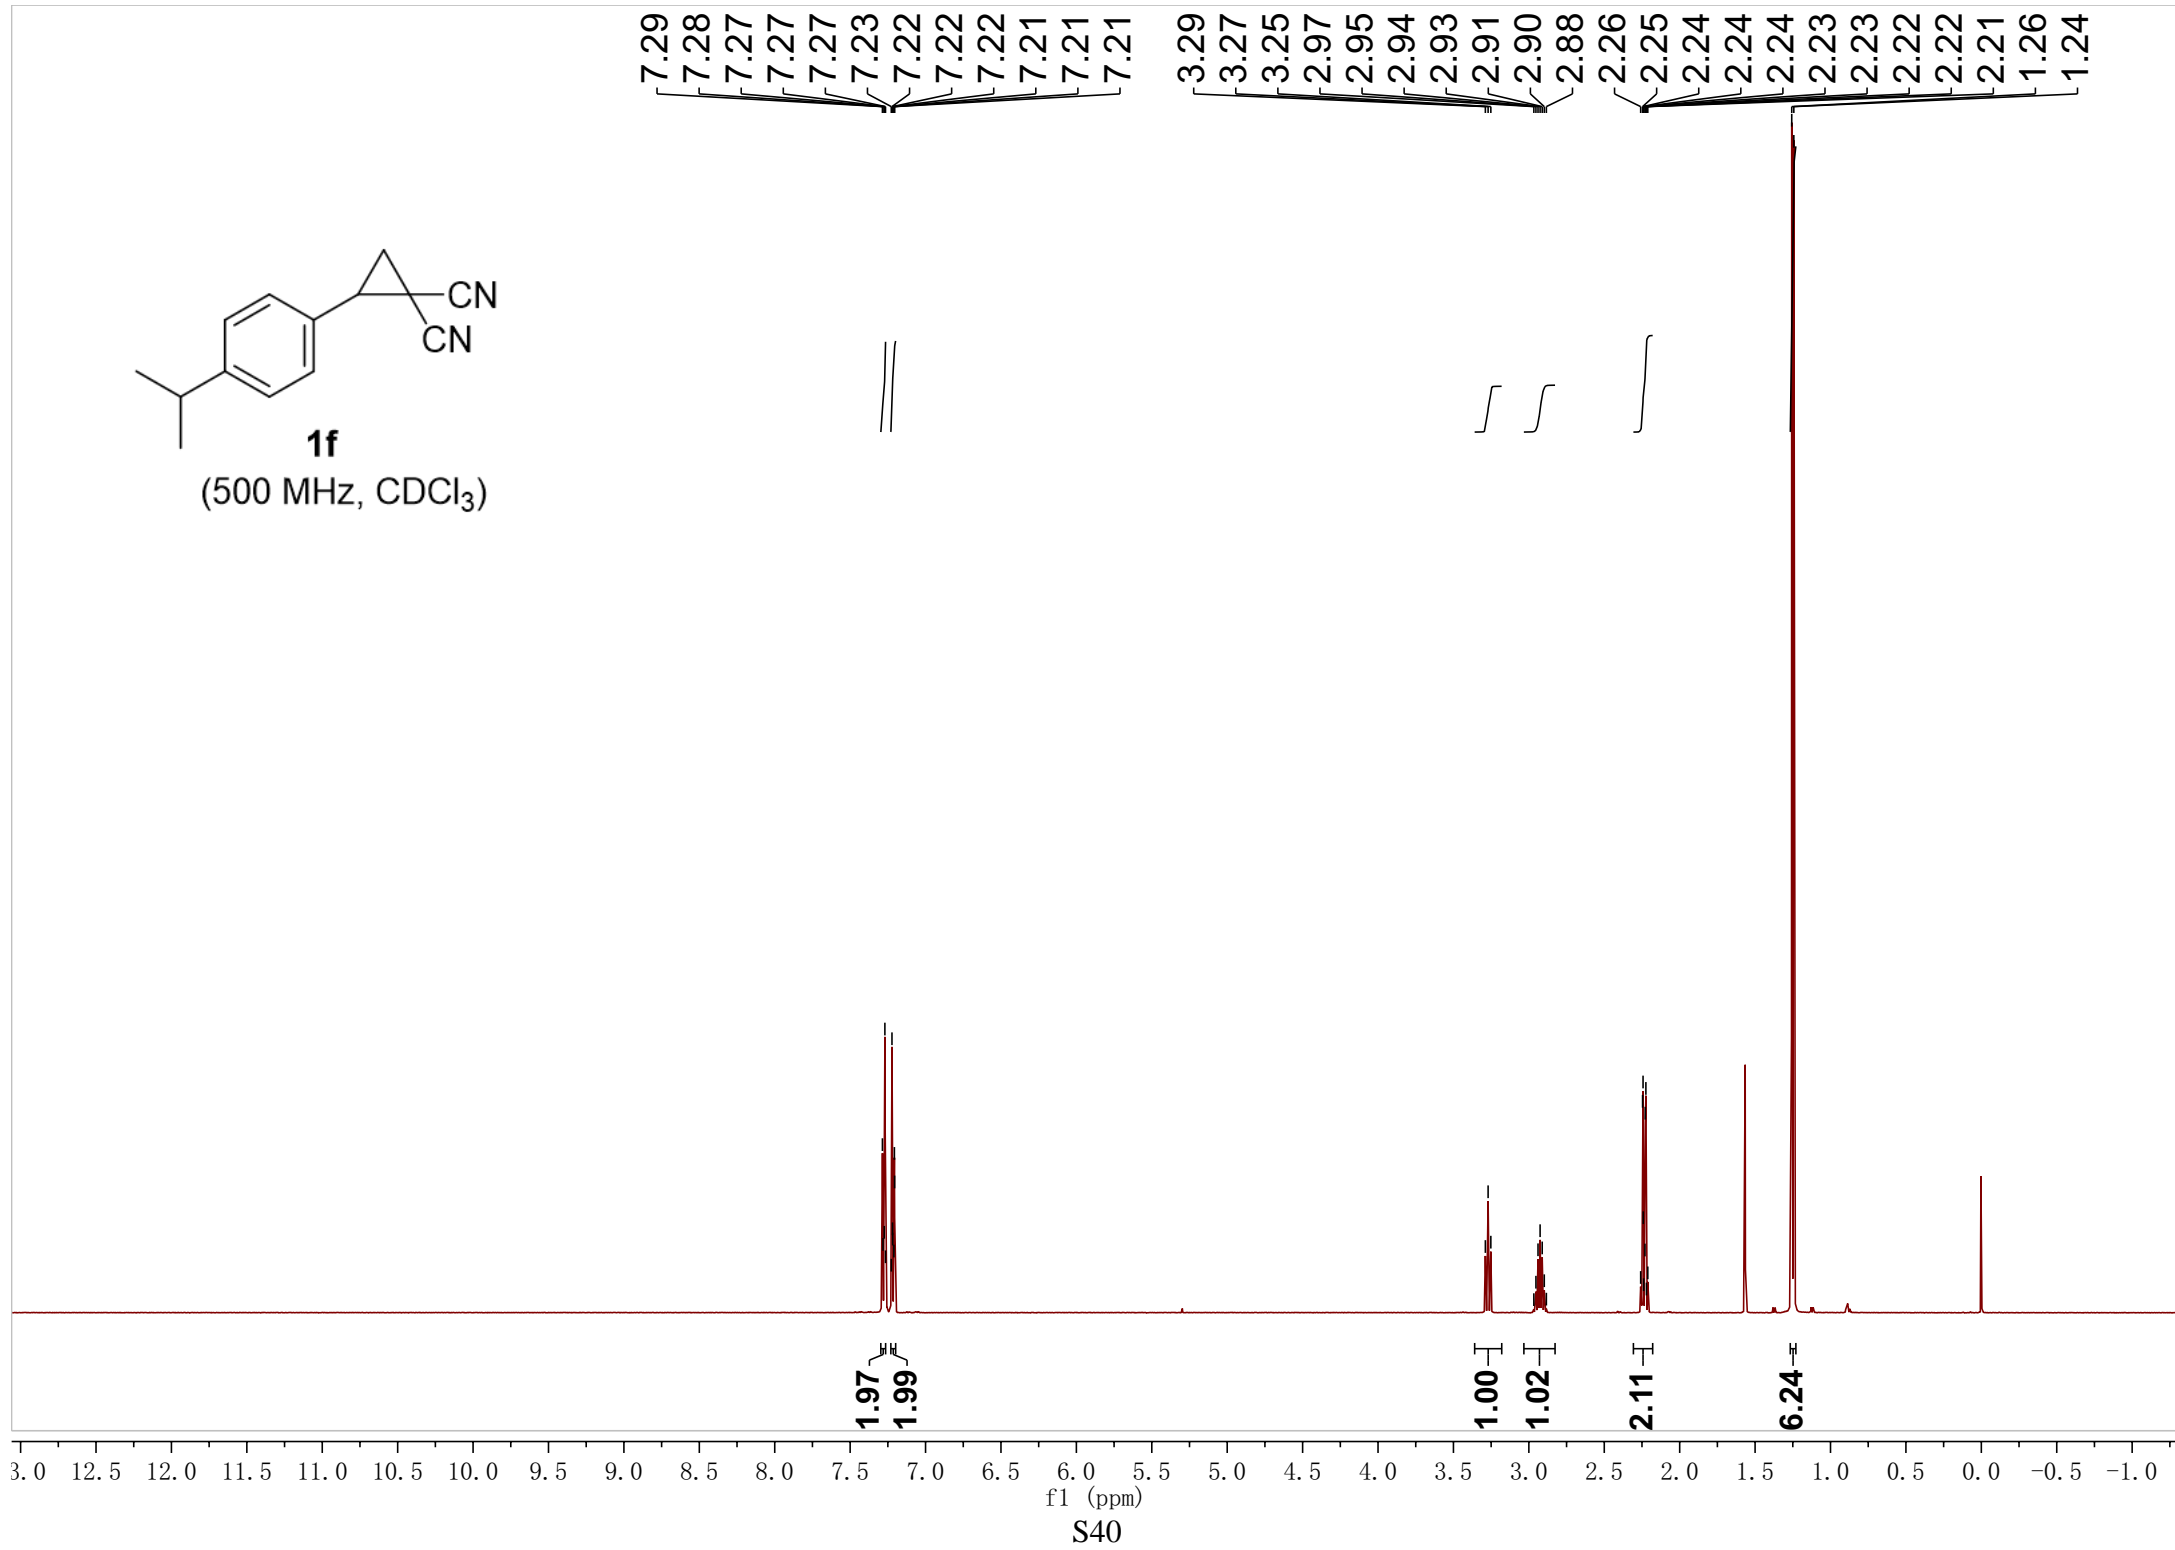



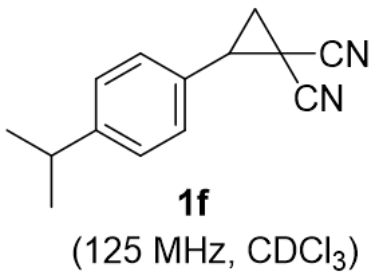

—150.55

128.39

127.93

127.36

115.57

113.27

35.25

34.00

23.92

22.60

—7.30

210 200 190 180 170 160 150 140 130 120 110 100 90 80 70 60 50 40 30 20 10 0 -10

f1 (ppm)

S41

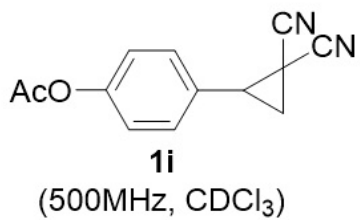

7.36  
7.36  
7.36  
7.35  
7.35  
7.35  
7.34  
7.34  
7.34  
7.34  
7.33  
7.33  
7.22  
7.21  
7.21  
7.20  
7.19  
7.19

3.33  
3.32  
3.30  
2.34  
2.31  
2.30  
2.30  
2.28  
2.27  
2.26  
2.26  
2.24

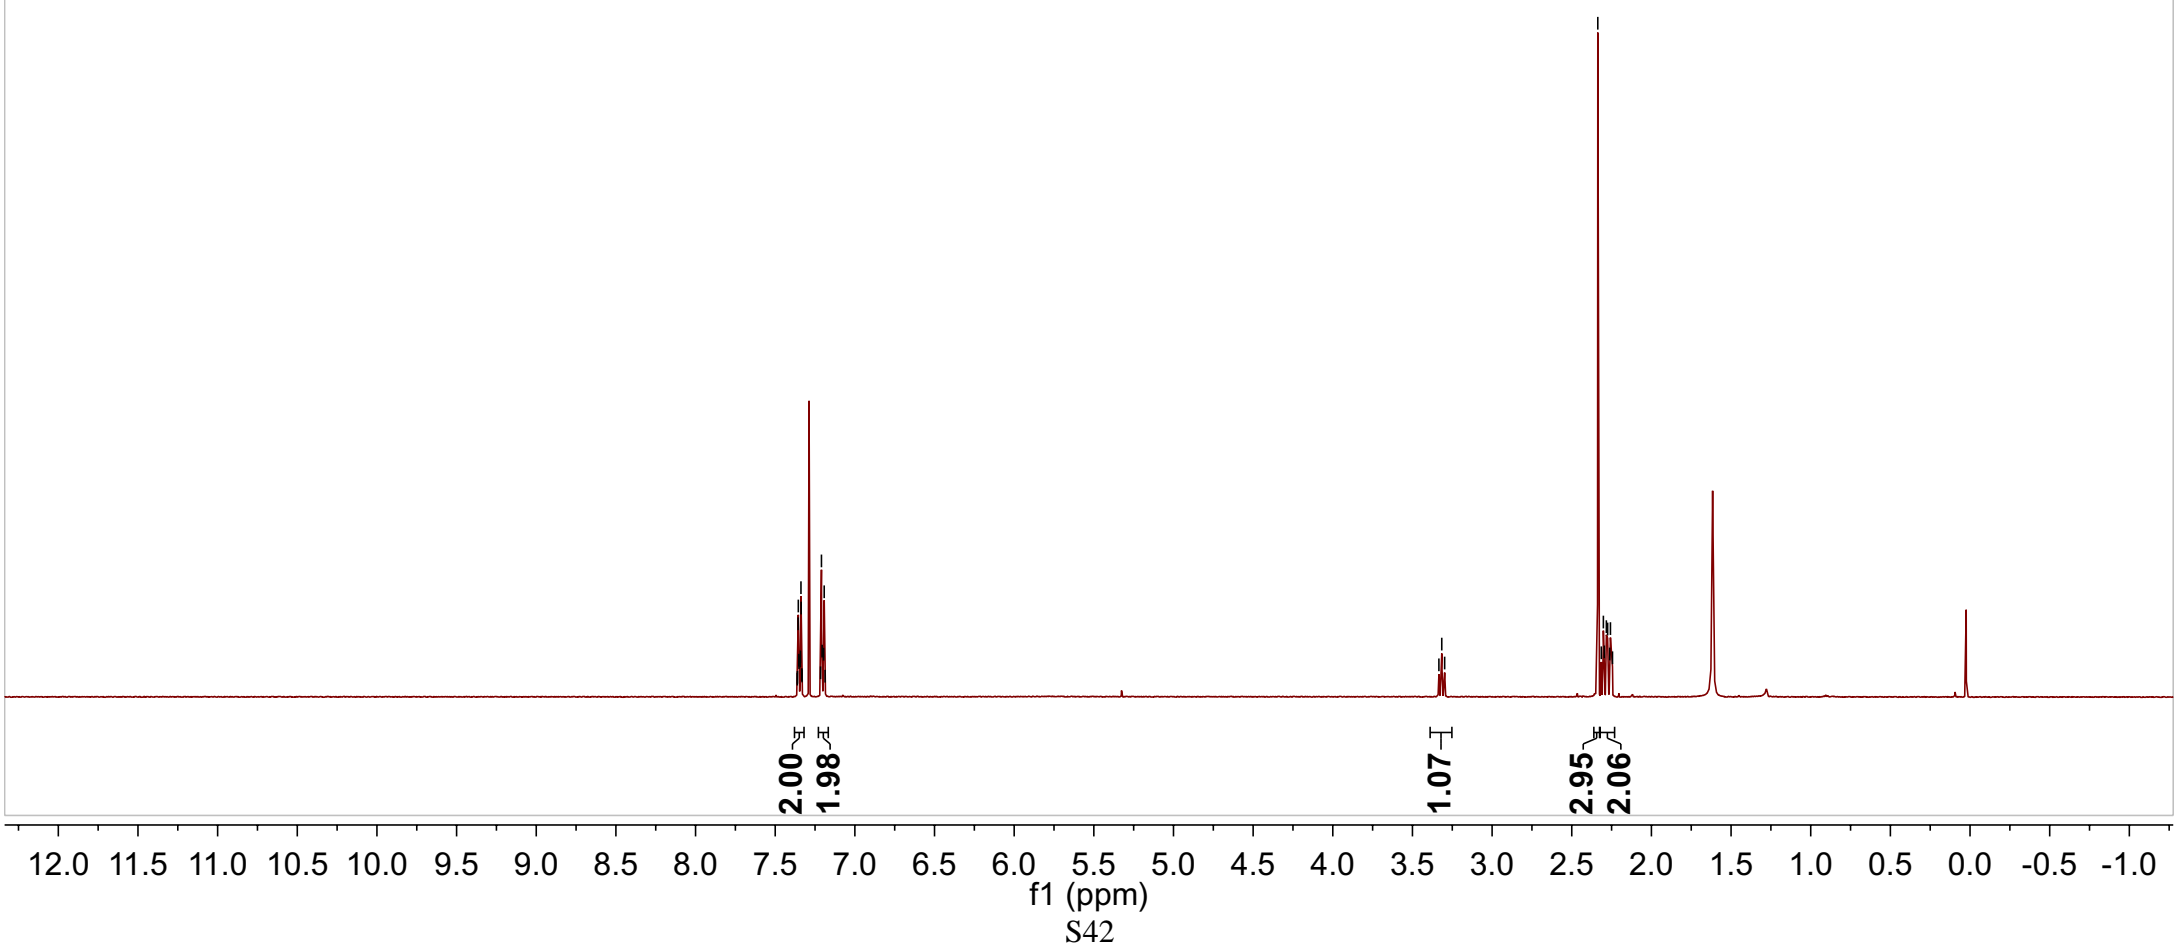

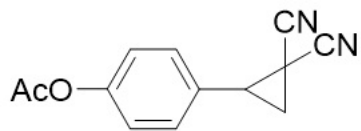

**1i**  
(125MHz, CDCl<sub>3</sub>)

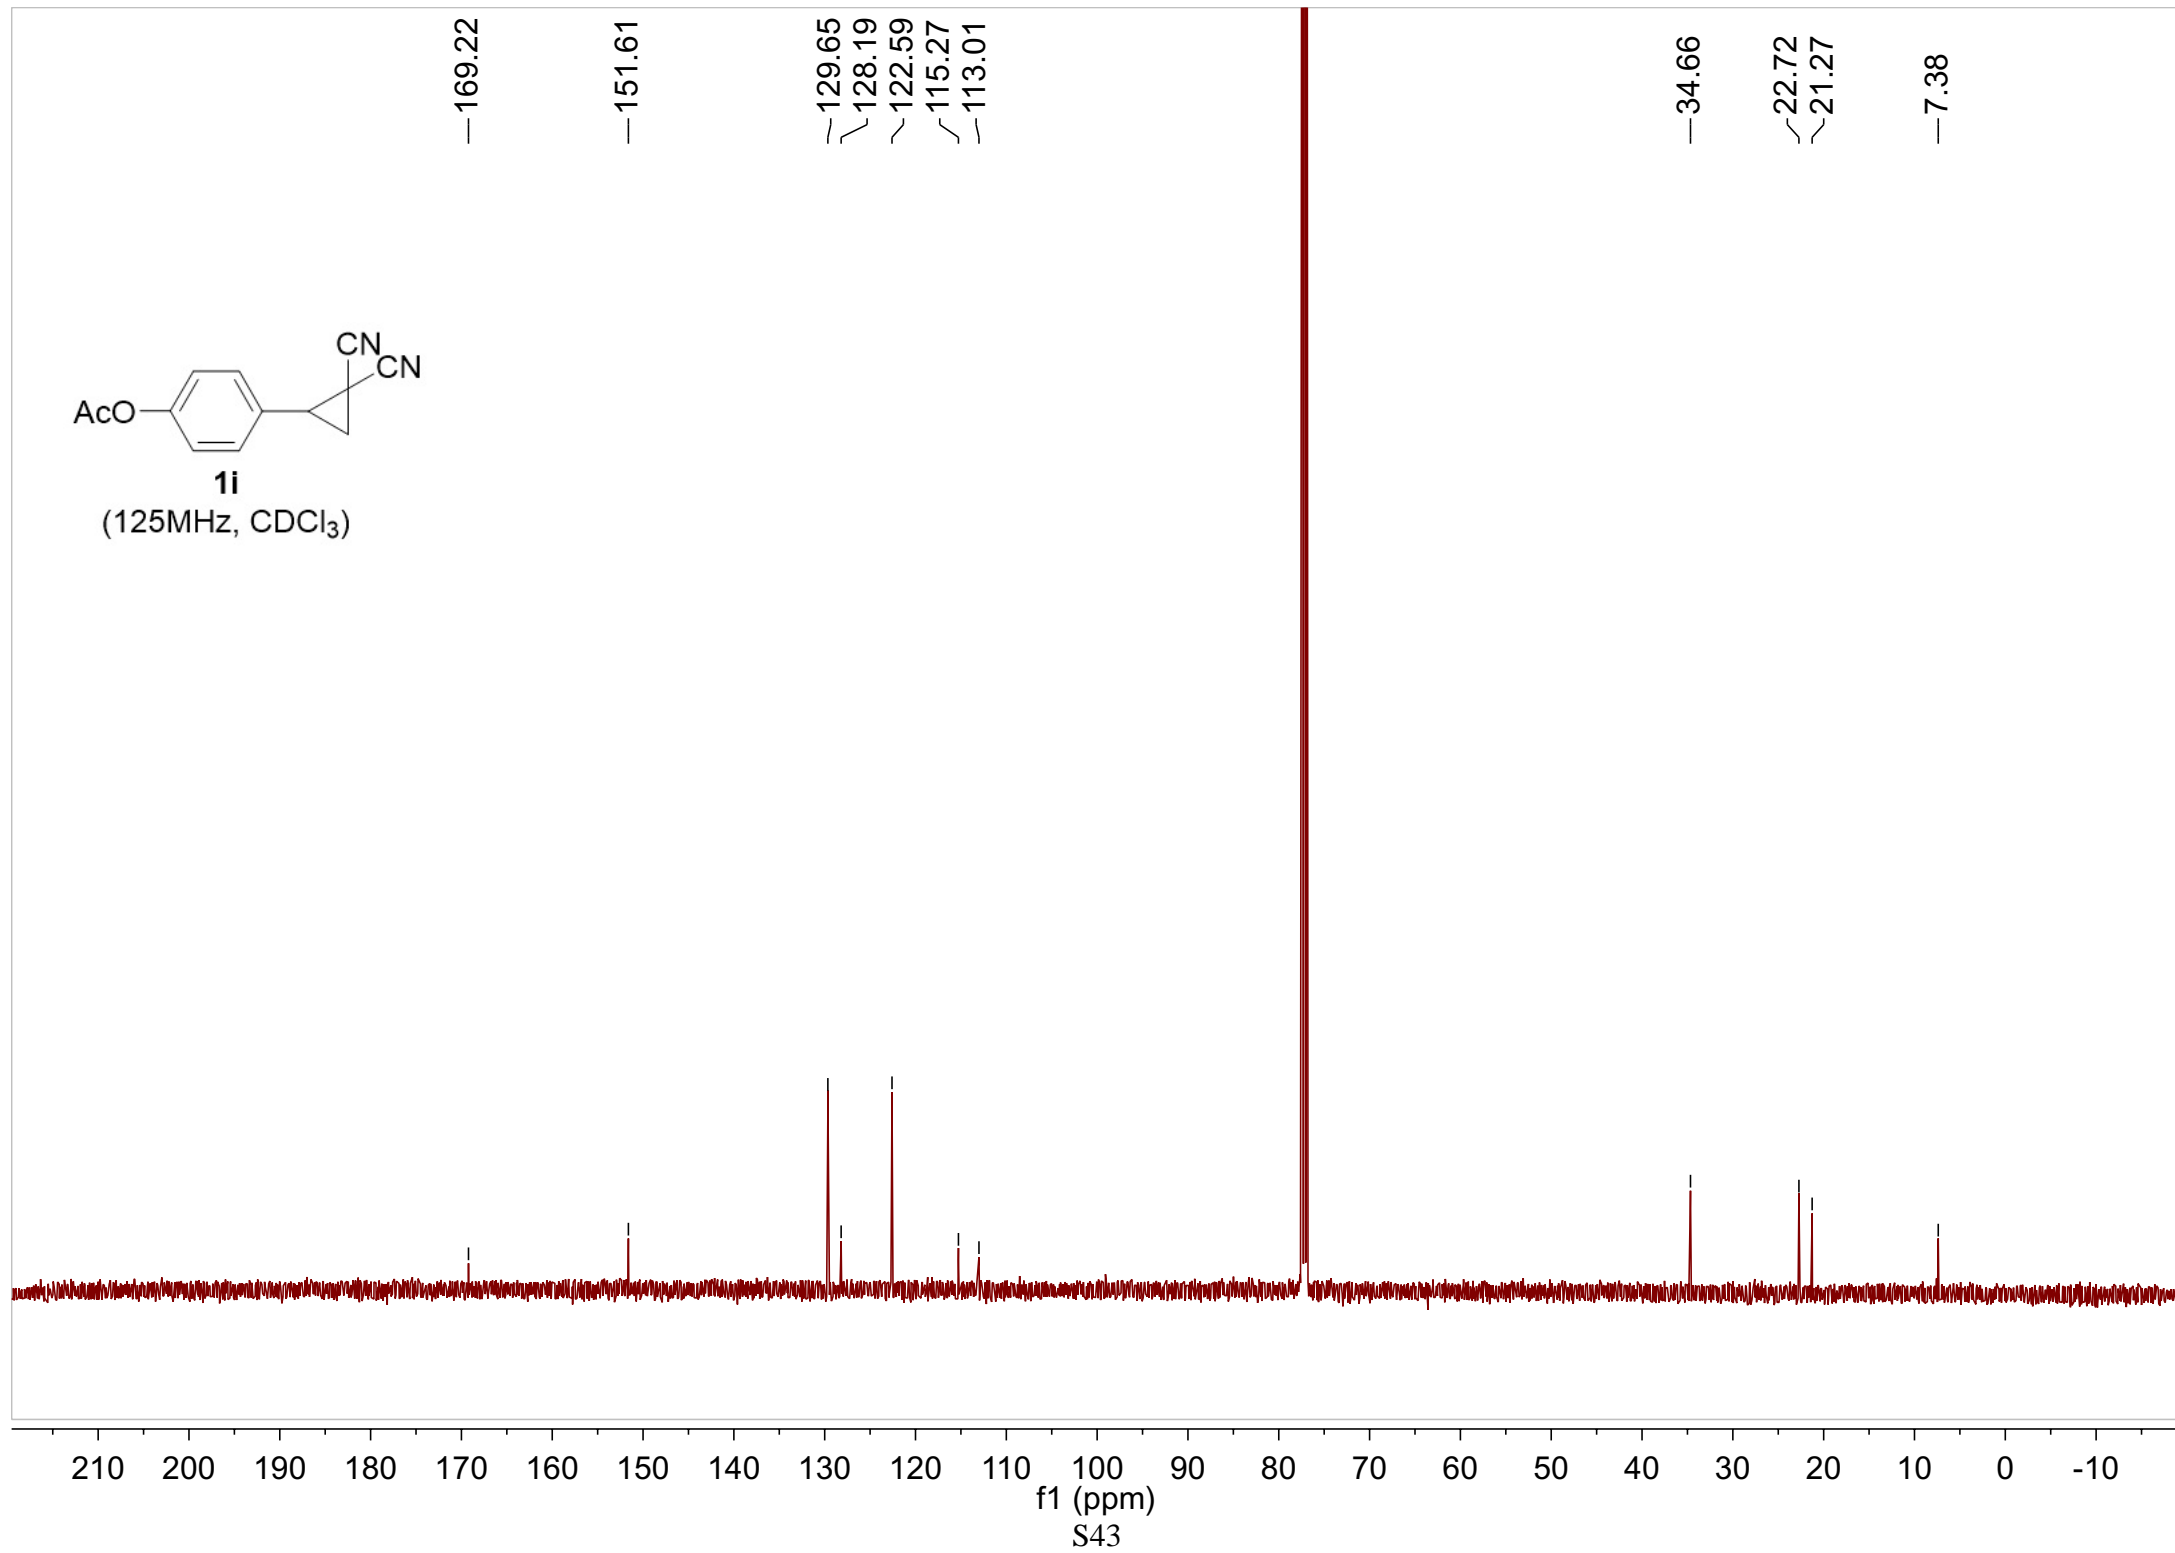

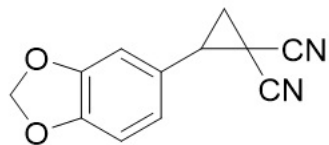

**1j**

(600MHz, CDCl<sub>3</sub>)

6.83  
6.83  
6.82  
6.78  
6.77  
6.76  
— 6.00

3.26  
3.24  
3.23  
2.22  
2.21  
2.20  
2.19  
2.19  
2.17

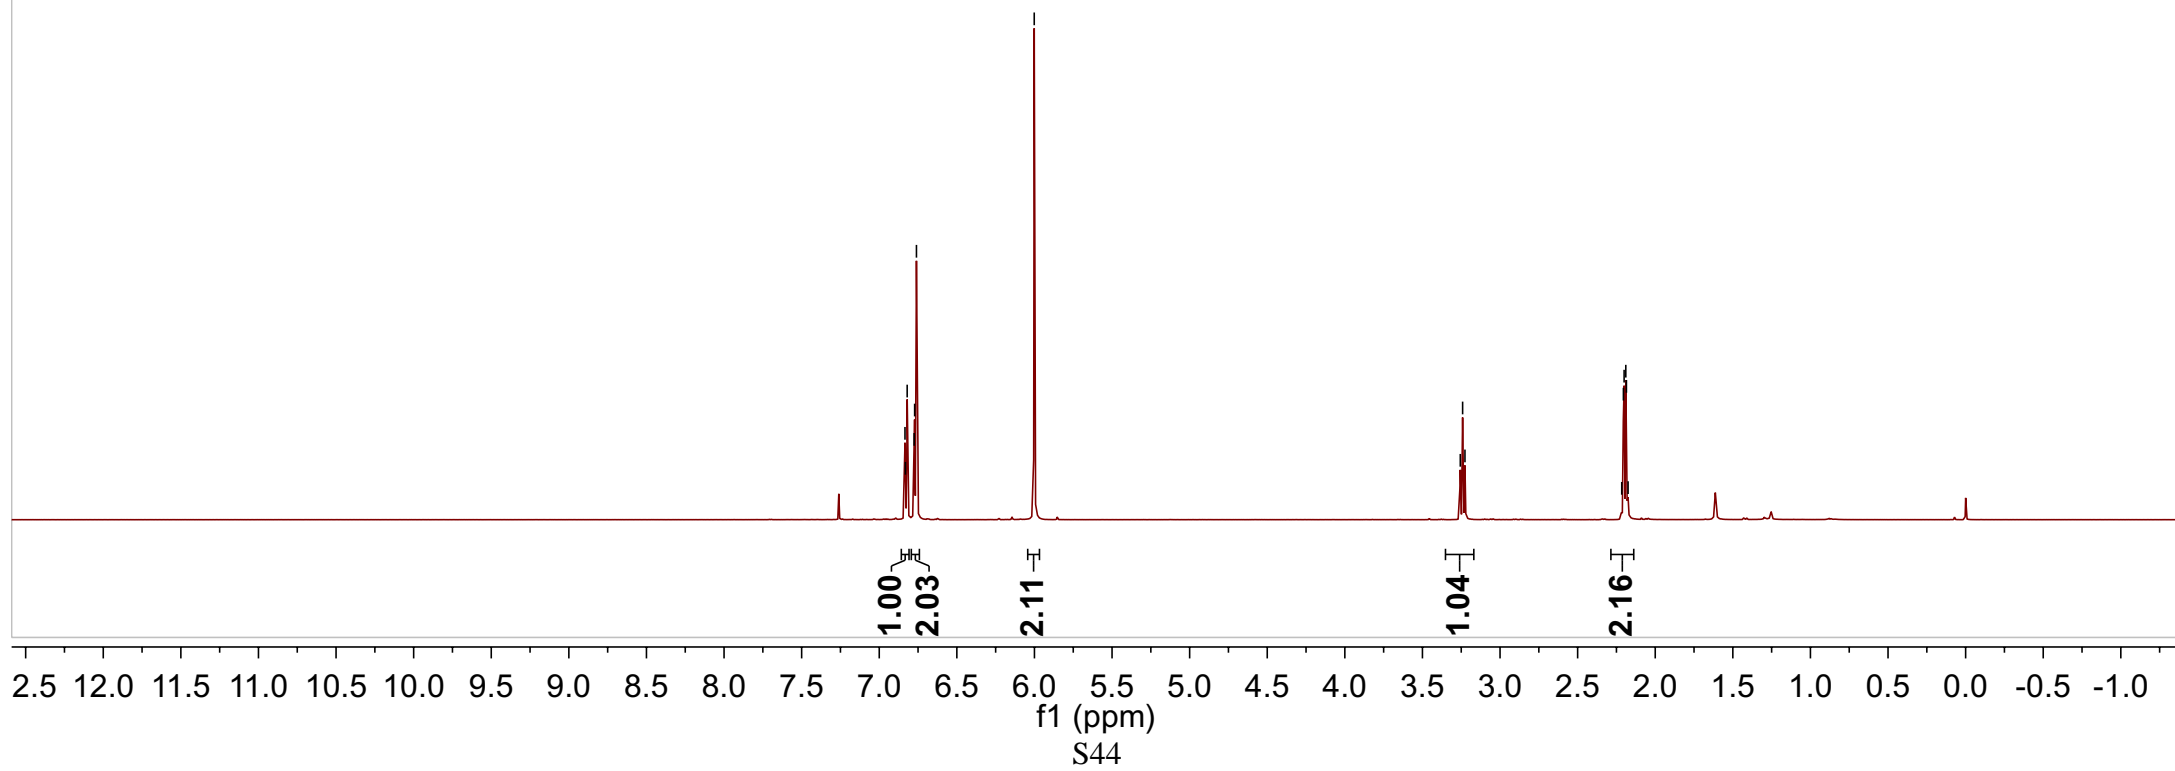

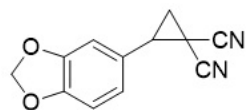

**1j**  
(150MHz, CDCl<sub>3</sub>)

148.76  
148.43  
124.18  
122.38  
115.42  
113.24  
108.82  
108.63  
101.77

-35.35  
-22.60  
-7.29

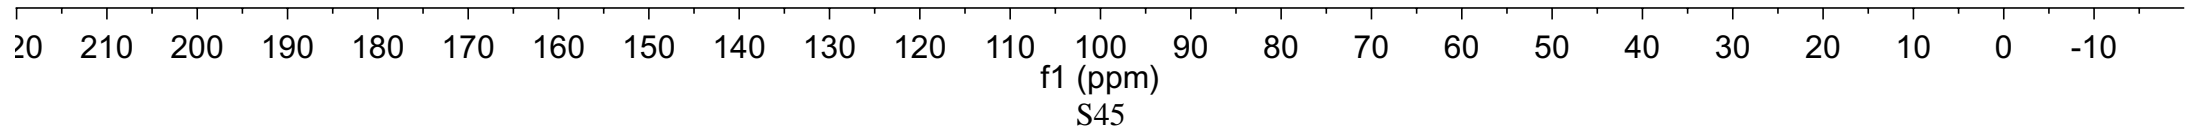

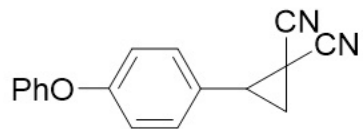

**1k**

(400MHz, CDCl<sub>3</sub>)

7.39  
7.39  
7.38  
7.37  
7.37  
7.36  
7.36  
7.35  
7.35  
7.34  
7.26  
7.26  
7.25  
7.24  
7.23  
7.23  
7.18  
7.18  
7.17  
7.16  
7.16  
7.15  
7.14  
7.14  
7.04  
7.04  
7.03  
7.03  
7.02  
7.02  
7.02  
7.01  
7.01  
3.30  
3.28  
3.26  
2.26  
2.25  
2.25  
2.24  
2.23  
2.22  
2.22  
2.20

7.39  
7.38  
7.37  
7.36  
7.35  
7.34  
7.26  
7.26  
7.25  
7.24  
7.23  
7.23  
7.18  
7.18  
7.17  
7.16  
7.16  
7.15  
7.14  
7.14  
7.04  
7.04  
7.03  
7.03  
7.02  
7.02  
7.02  
7.01  
7.01

3.30  
3.28  
3.26

2.26  
2.25  
2.25  
2.24  
2.23  
2.22  
2.22  
2.20

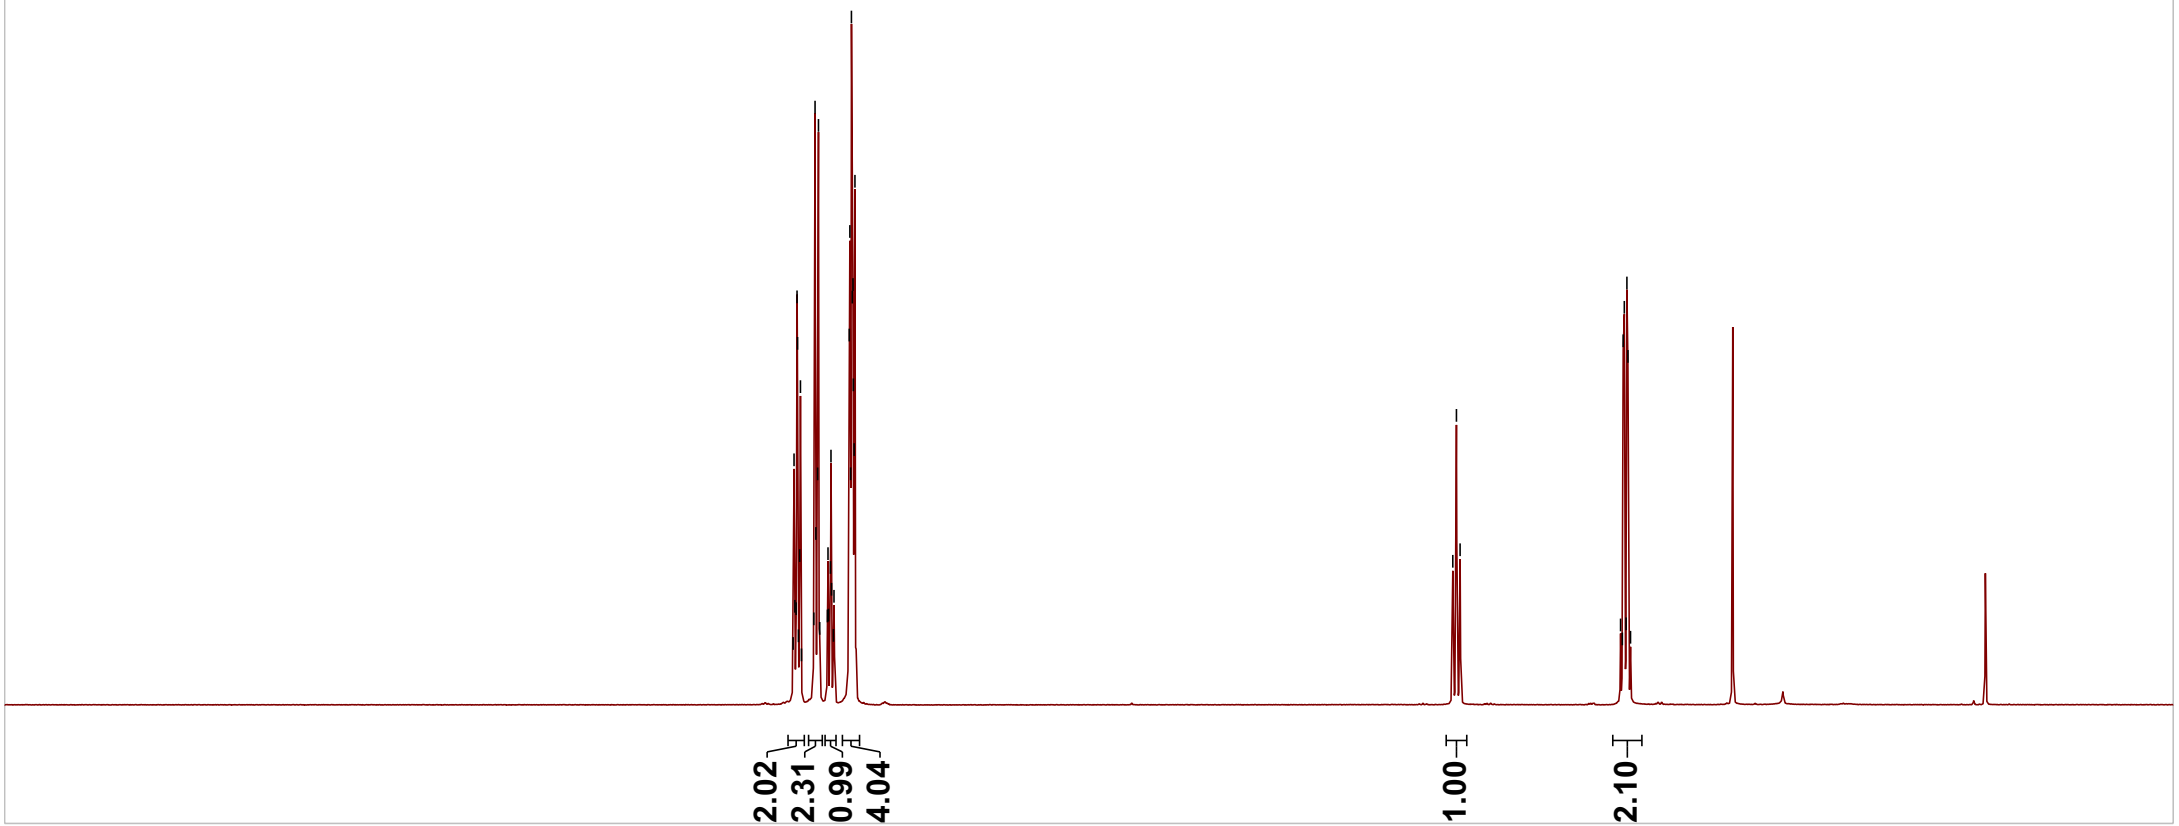

2.02  
2.31  
0.99  
4.04

1.00

2.10

12.0 11.5 11.0 10.5 10.0 9.5 9.0 8.5 8.0 7.5 7.0 6.5 6.0 5.5 5.0 4.5 4.0 3.5 3.0 2.5 2.0 1.5 1.0 0.5 0.0 -0.5 -1.0  
f1 (ppm)  
S46

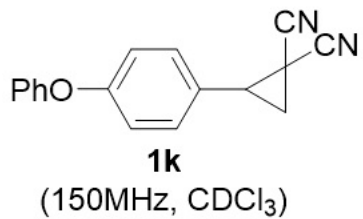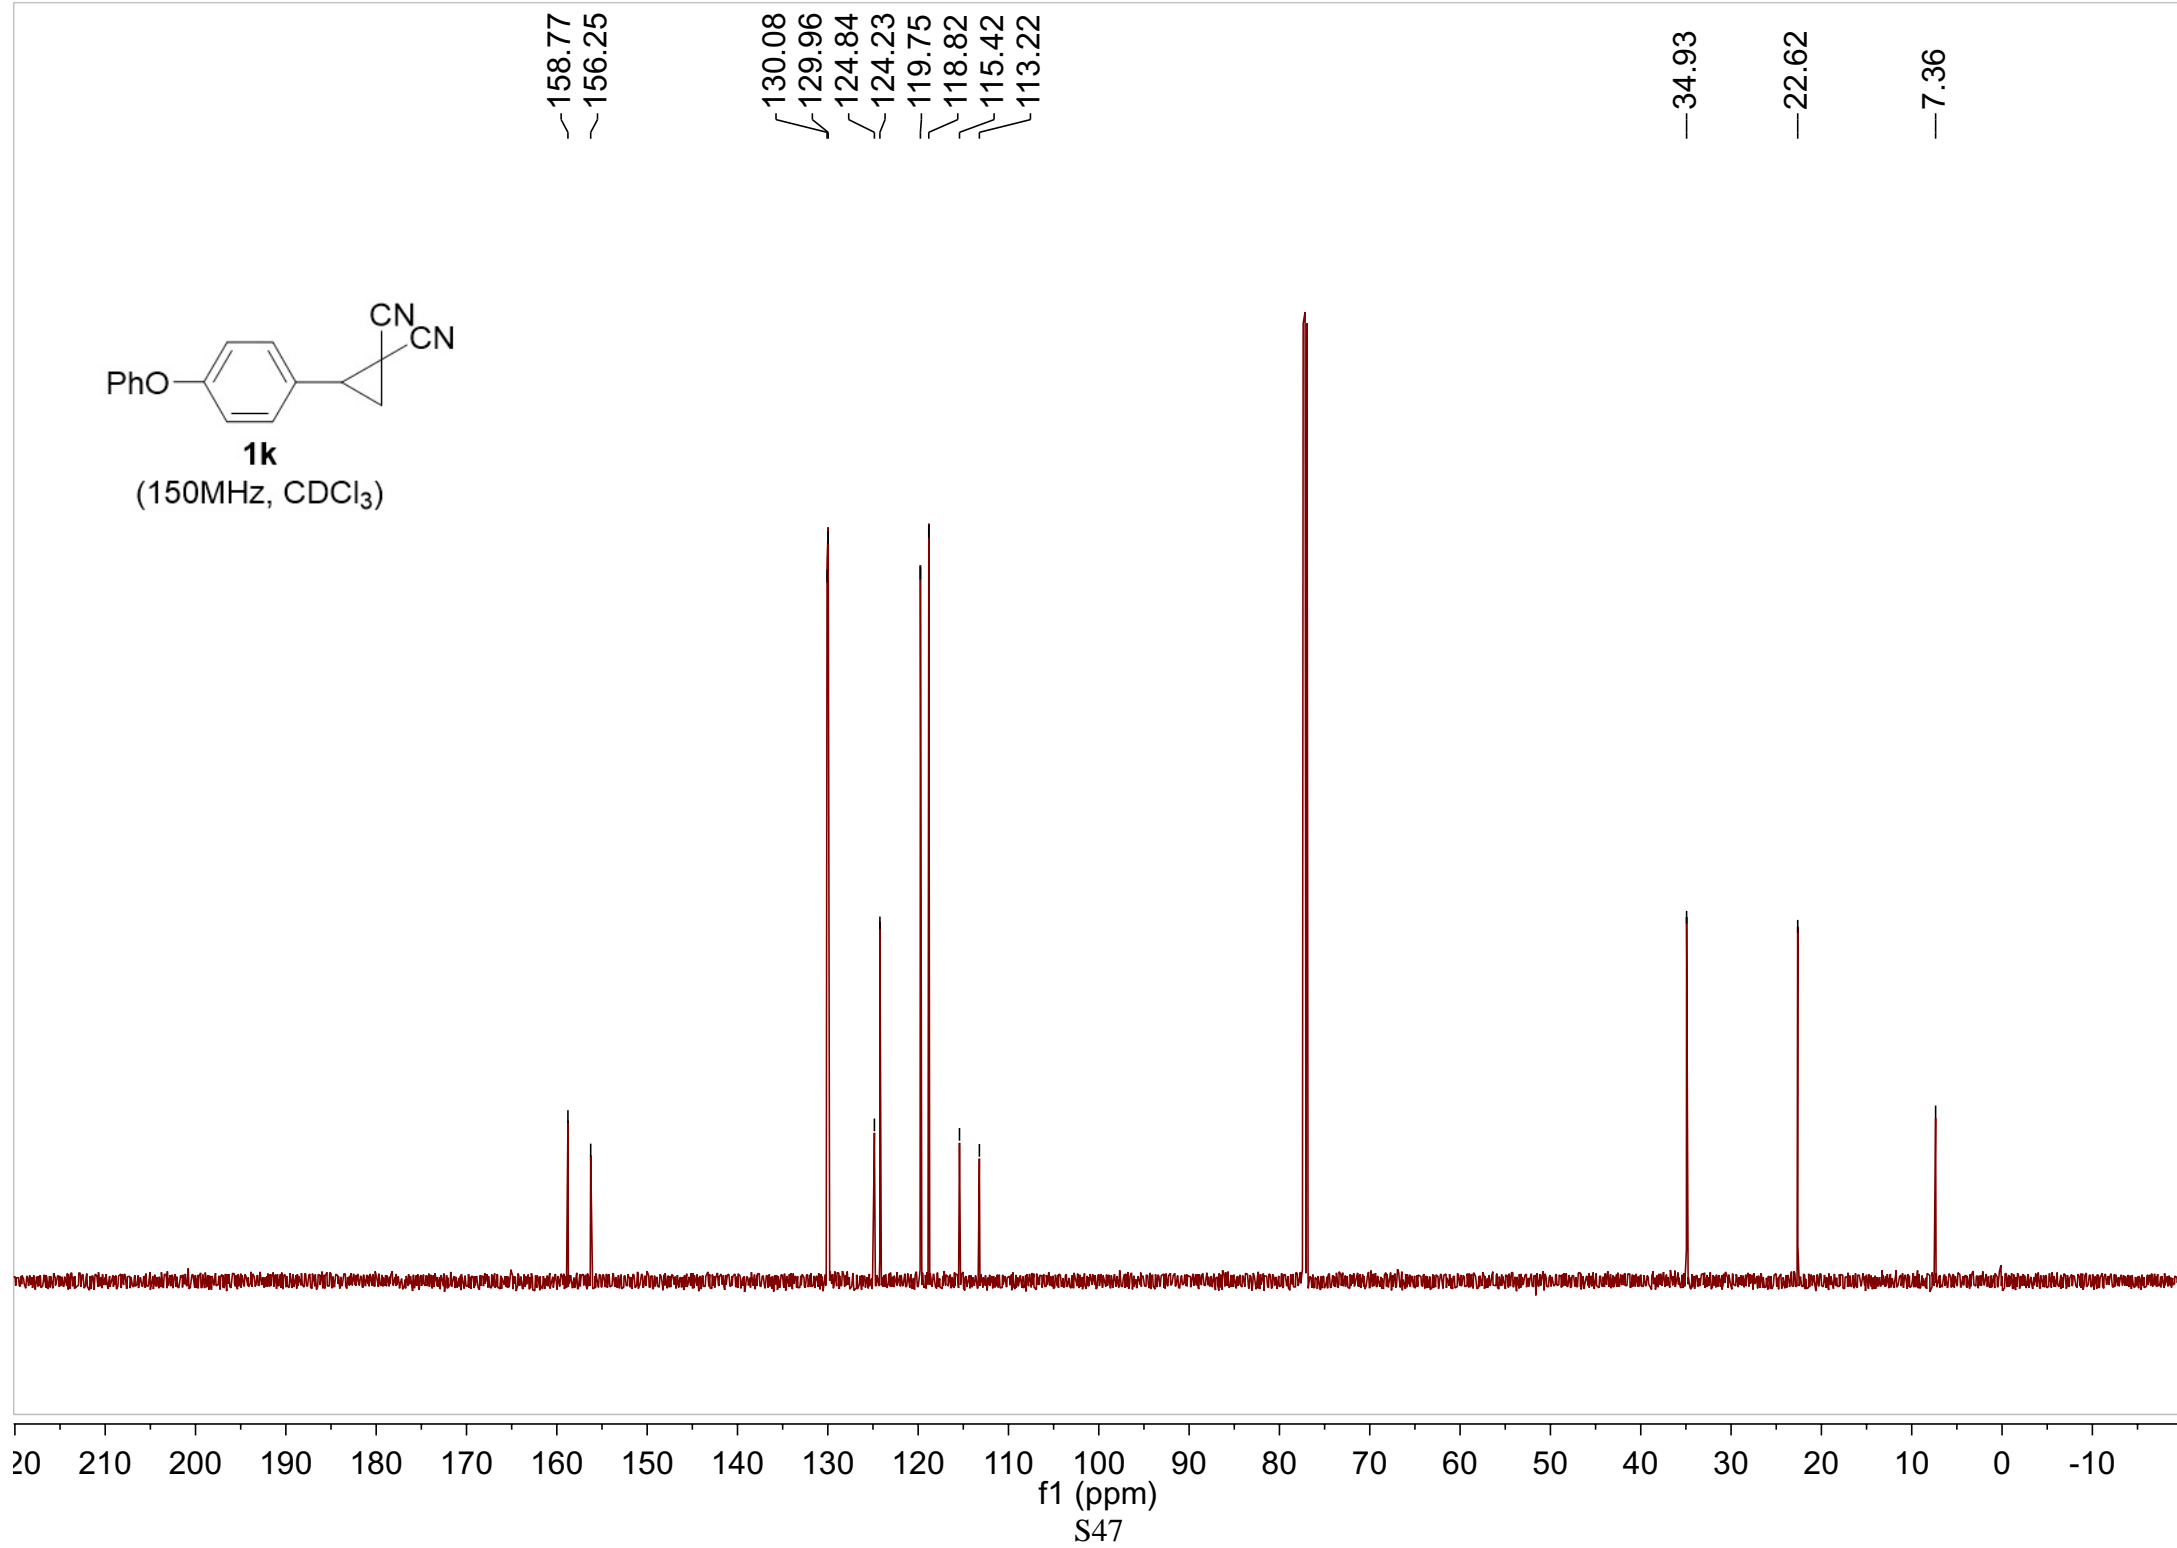

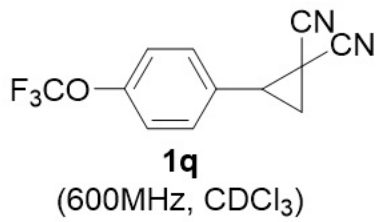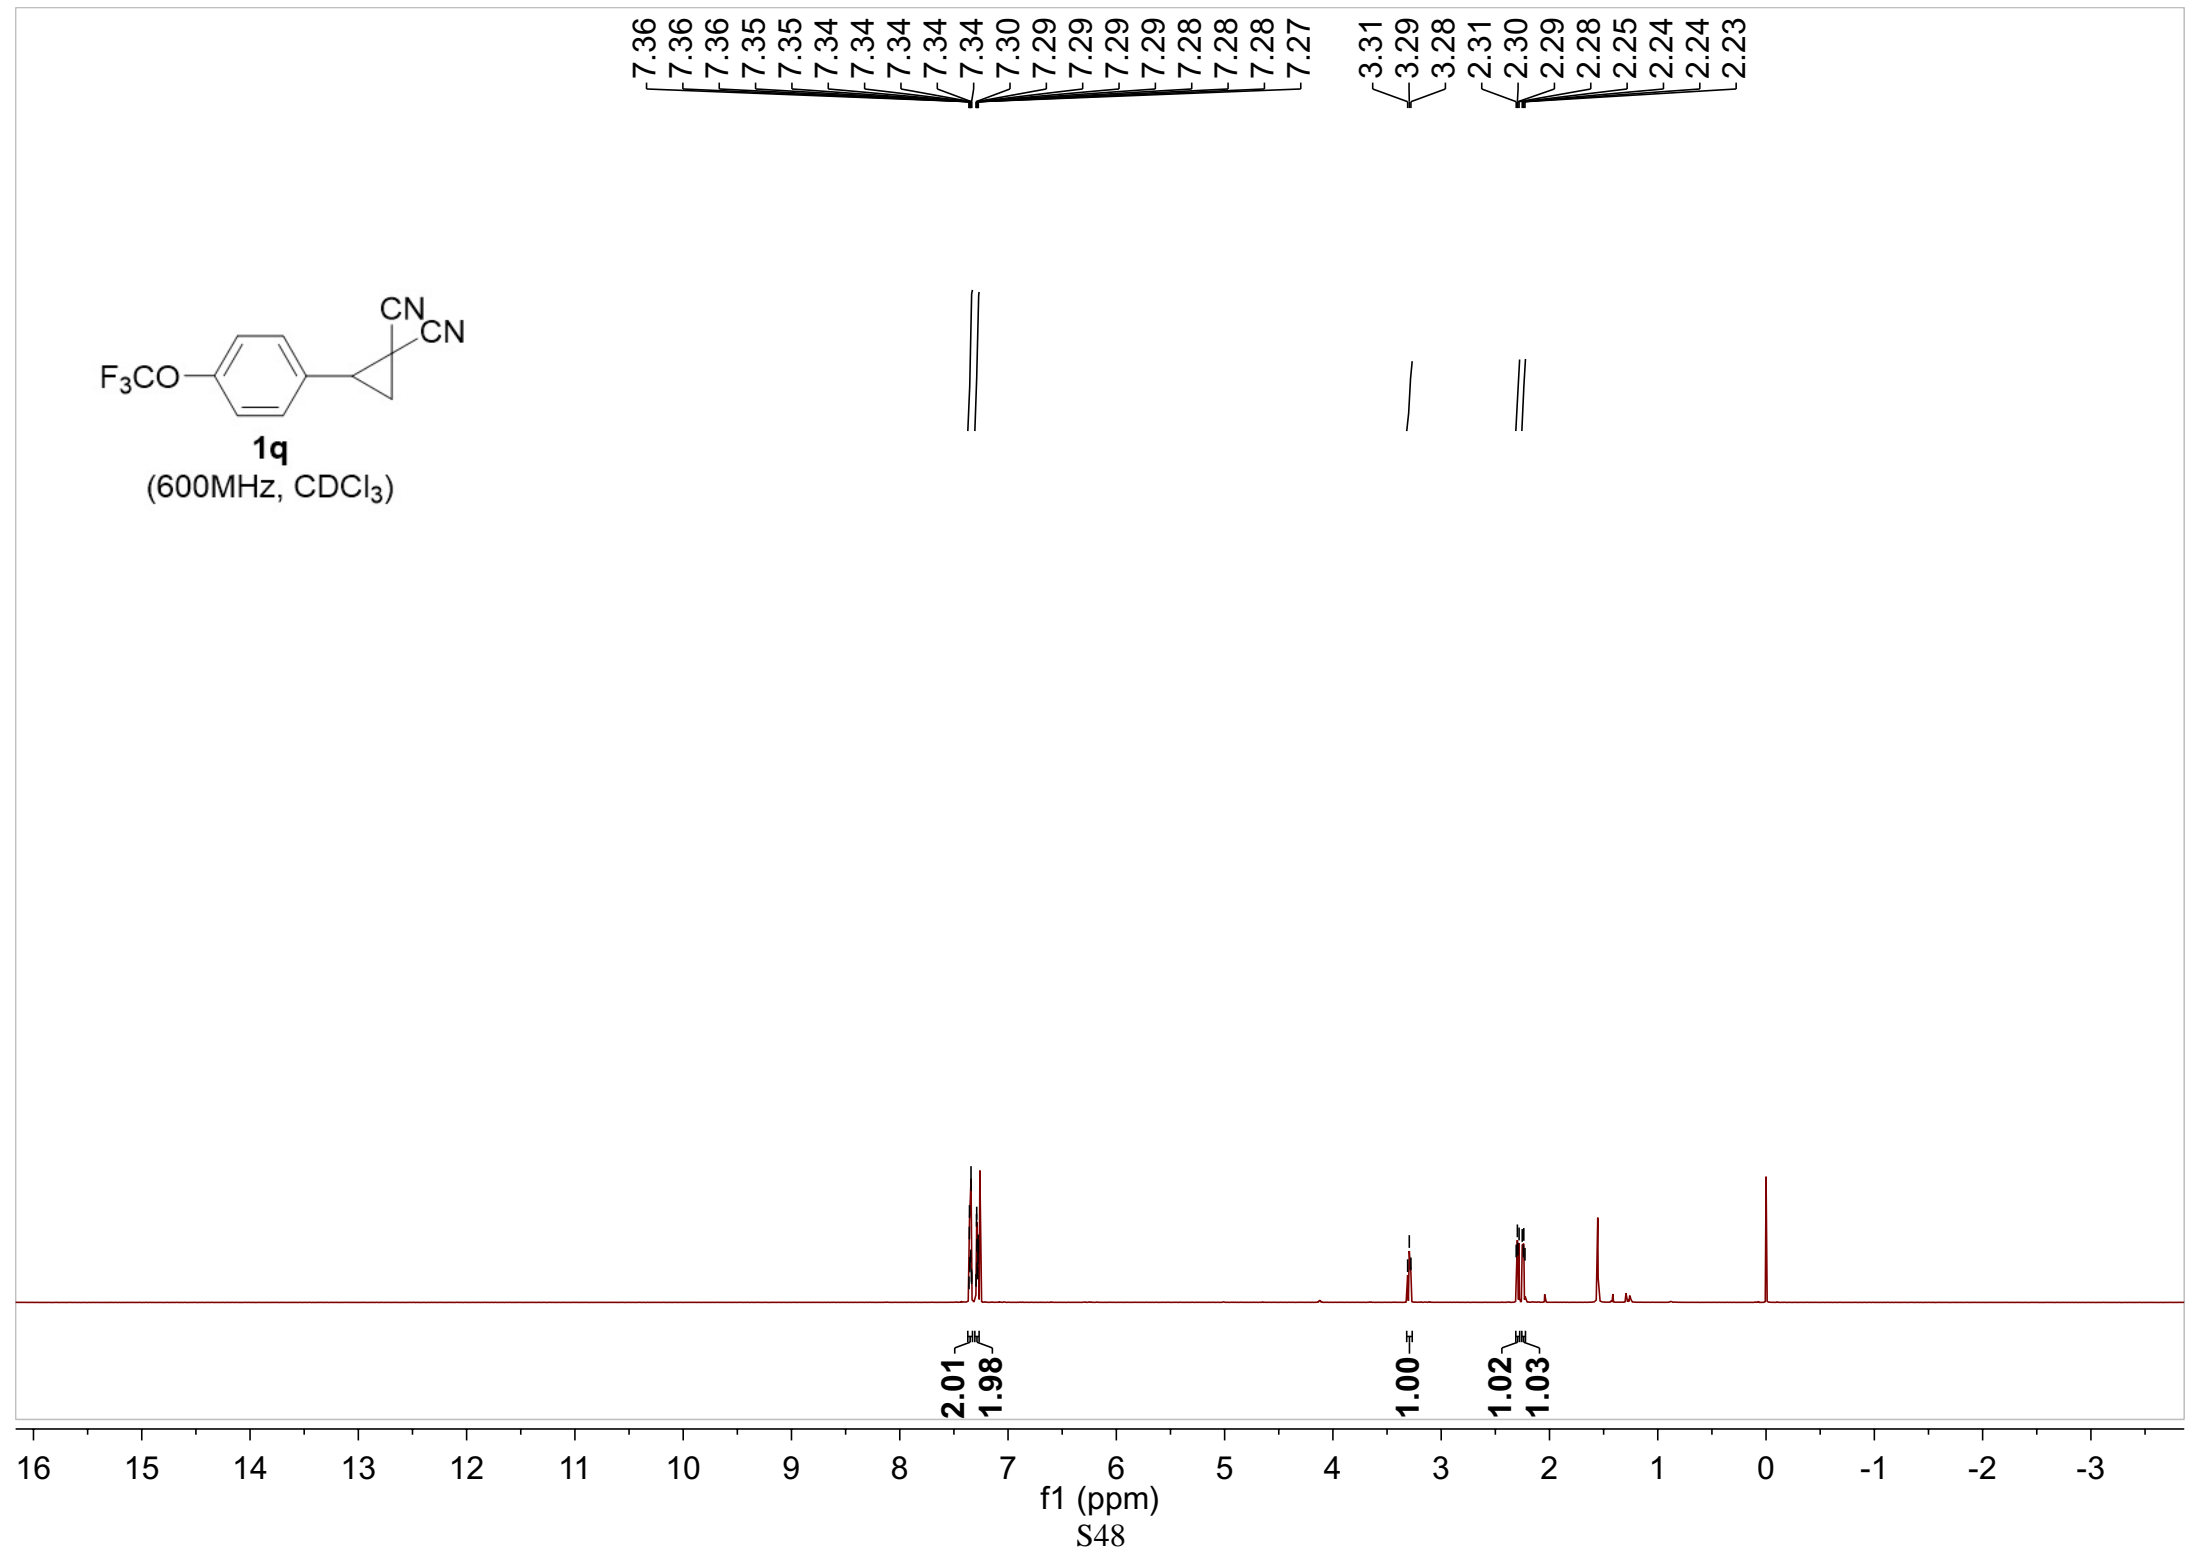



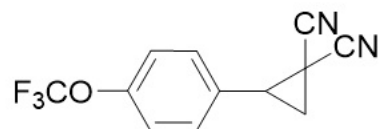

**1q**

(565MHz, CDCl<sub>3</sub>)

---57.83

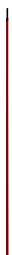

10 0 -10 -20 -30 -40 -50 -60 -70 -80 -90 -100 -110 -120 -130 -140 -150 -160 -170 -180 -190 -200 -210

f1 (ppm)

S49

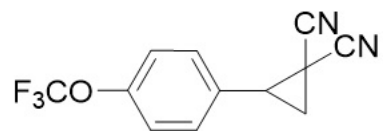

**1q**

(150MHz, CDCl<sub>3</sub>)

—149.97

130.00

129.19

121.48

121.20

119.49

114.93

112.73

—34.19

—22.53

—7.31

20 210 200 190 180 170 160 150 140 130 120 110 100 90 80 70 60 50 40 30 20 10 0 -10 -2

f1 (ppm)  
S50

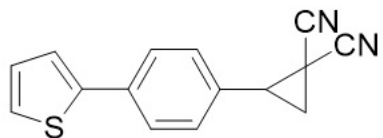

**1s**

(600MHz, CDCl<sub>3</sub>)

7.67  
7.65  
7.36  
7.35  
7.35  
7.35  
7.33  
7.33  
7.32  
7.32  
7.31  
7.30  
7.30  
7.29  
7.11  
7.10  
7.10  
7.10  
7.09  
7.08  
3.32  
3.31  
3.29  
2.30  
2.29  
2.28  
2.27  
2.27  
2.26

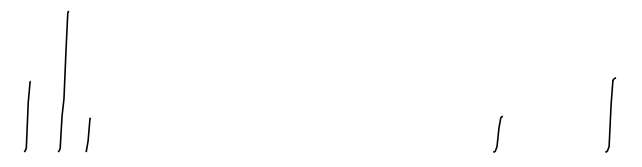

1.99  
3.96  
0.96  
1.01  
2.09

16 15 14 13 12 11 10 9 8 7 6 5 4 3 2 1 0 -1 -2 -3

f1 (ppm)  
S51

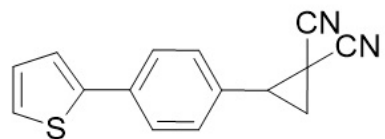

**1s**

(150MHz, CDCl<sub>3</sub>)

143.32  
135.94  
129.72  
129.18  
128.54  
126.75  
125.99  
124.24  
115.57  
113.32

-35.29

-22.72

-7.66

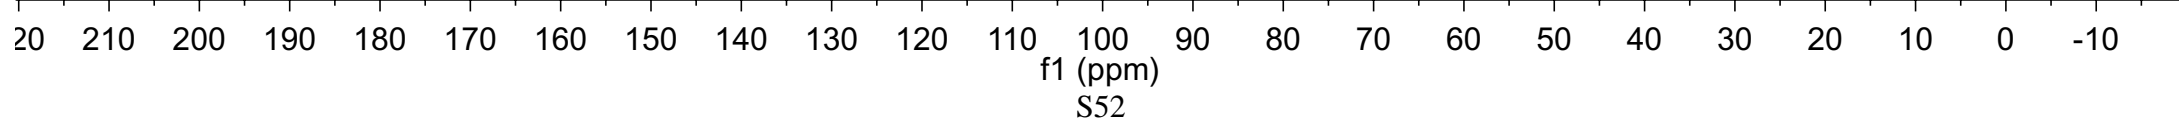

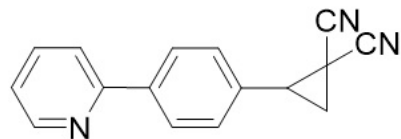

**1t**

(400MHz, CDCl<sub>3</sub>)

8.71 8.71 8.71 8.71 8.70 8.70 8.70 8.69 8.08 8.07 8.07 8.06 8.05 8.05 7.80 7.79 7.78 7.78 7.77 7.77 7.76 7.76 7.75 7.75 7.75 7.74 7.73 7.73 7.73 7.42 7.42 7.42 7.41 7.41 7.40 7.40 7.40 7.39 7.28 7.28 7.27 7.27 7.26 7.26 7.26 7.25 7.25 3.37 3.35 3.33 2.34 2.32 2.32 2.31 2.30 2.29 2.28 2.27

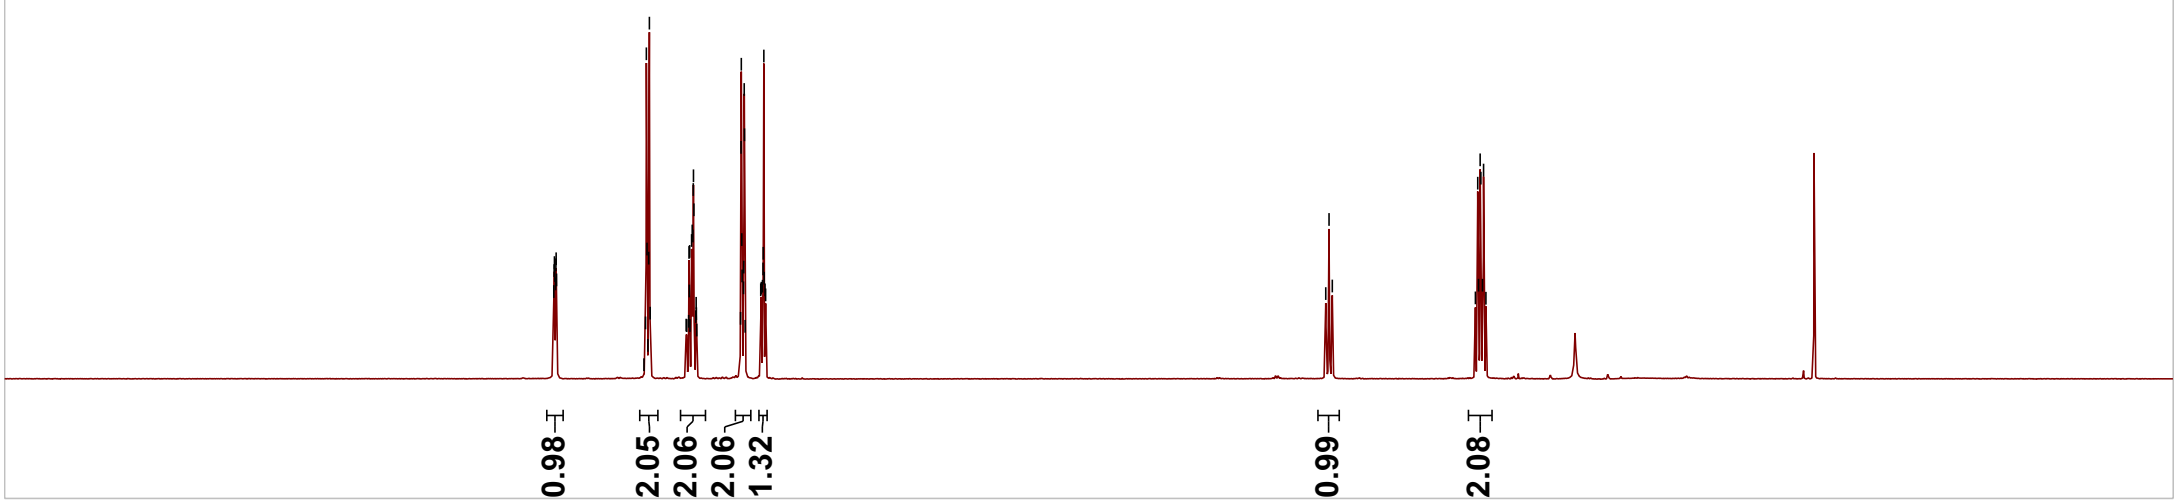

2.5 12.0 11.5 11.0 10.5 10.0 9.5 9.0 8.5 8.0 7.5 7.0 6.5 6.0 5.5 5.0 4.5 4.0 3.5 3.0 2.5 2.0 1.5 1.0 0.5 0.0 -0.5 -1.0 -1.5 -2.0

f1 (ppm)  
S53

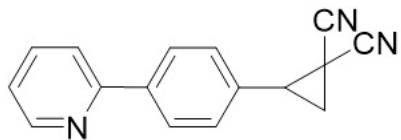

**1t**

(100MHz, CDCl<sub>3</sub>)

— 156.28  
— 149.93  
/ 140.64  
/ 137.02  
/ 131.21  
/ 128.83  
~ 127.69  
— 122.75  
/ 120.77  
/ 115.36  
/ 113.04

— 35.05

— 22.54

— 7.46

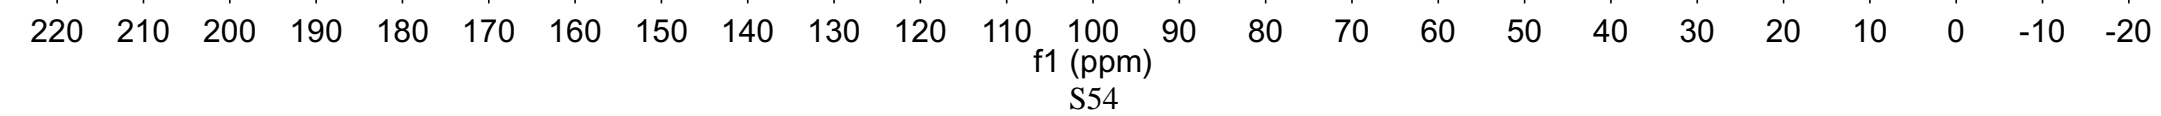

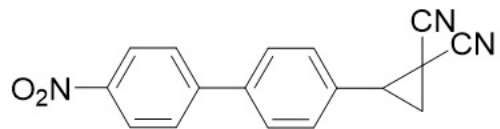

**1u**

(400MHz, CDCl<sub>3</sub>)

8.33  
8.33  
8.32  
8.31  
8.31  
8.30  
7.76  
7.75  
7.75  
7.73  
7.73  
7.72  
7.70  
7.69  
7.68  
7.68  
7.46  
7.45  
7.44  
7.43  
7.43  
3.39  
3.37  
3.35  
2.34  
2.32

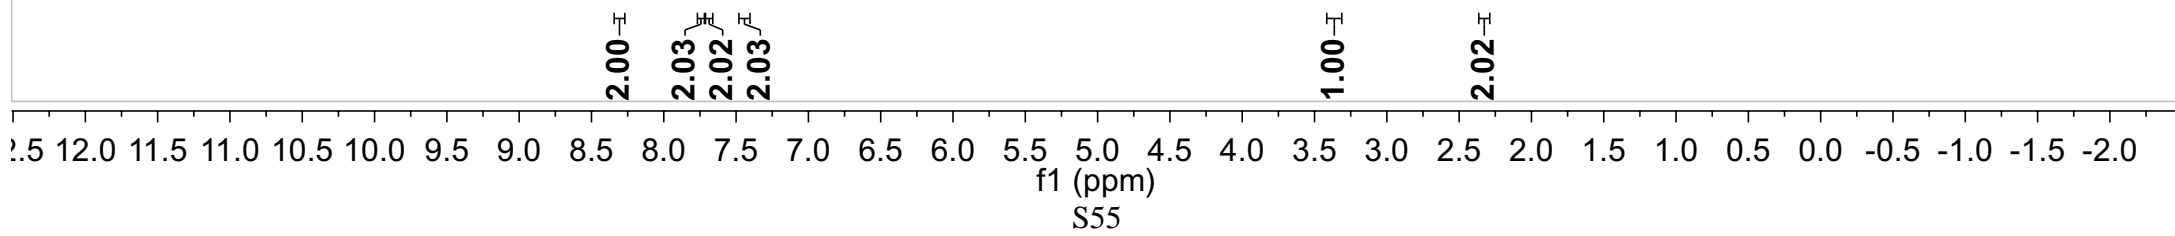

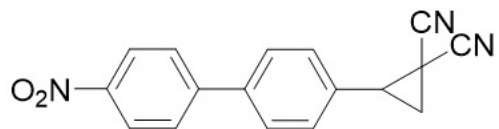

**1u**

(100MHz, CDCl<sub>3</sub>)

147.56  
146.39  
140.07  
131.44  
129.29  
128.24  
128.03  
124.37  
115.19  
113.04

-34.83

-22.56

-7.57

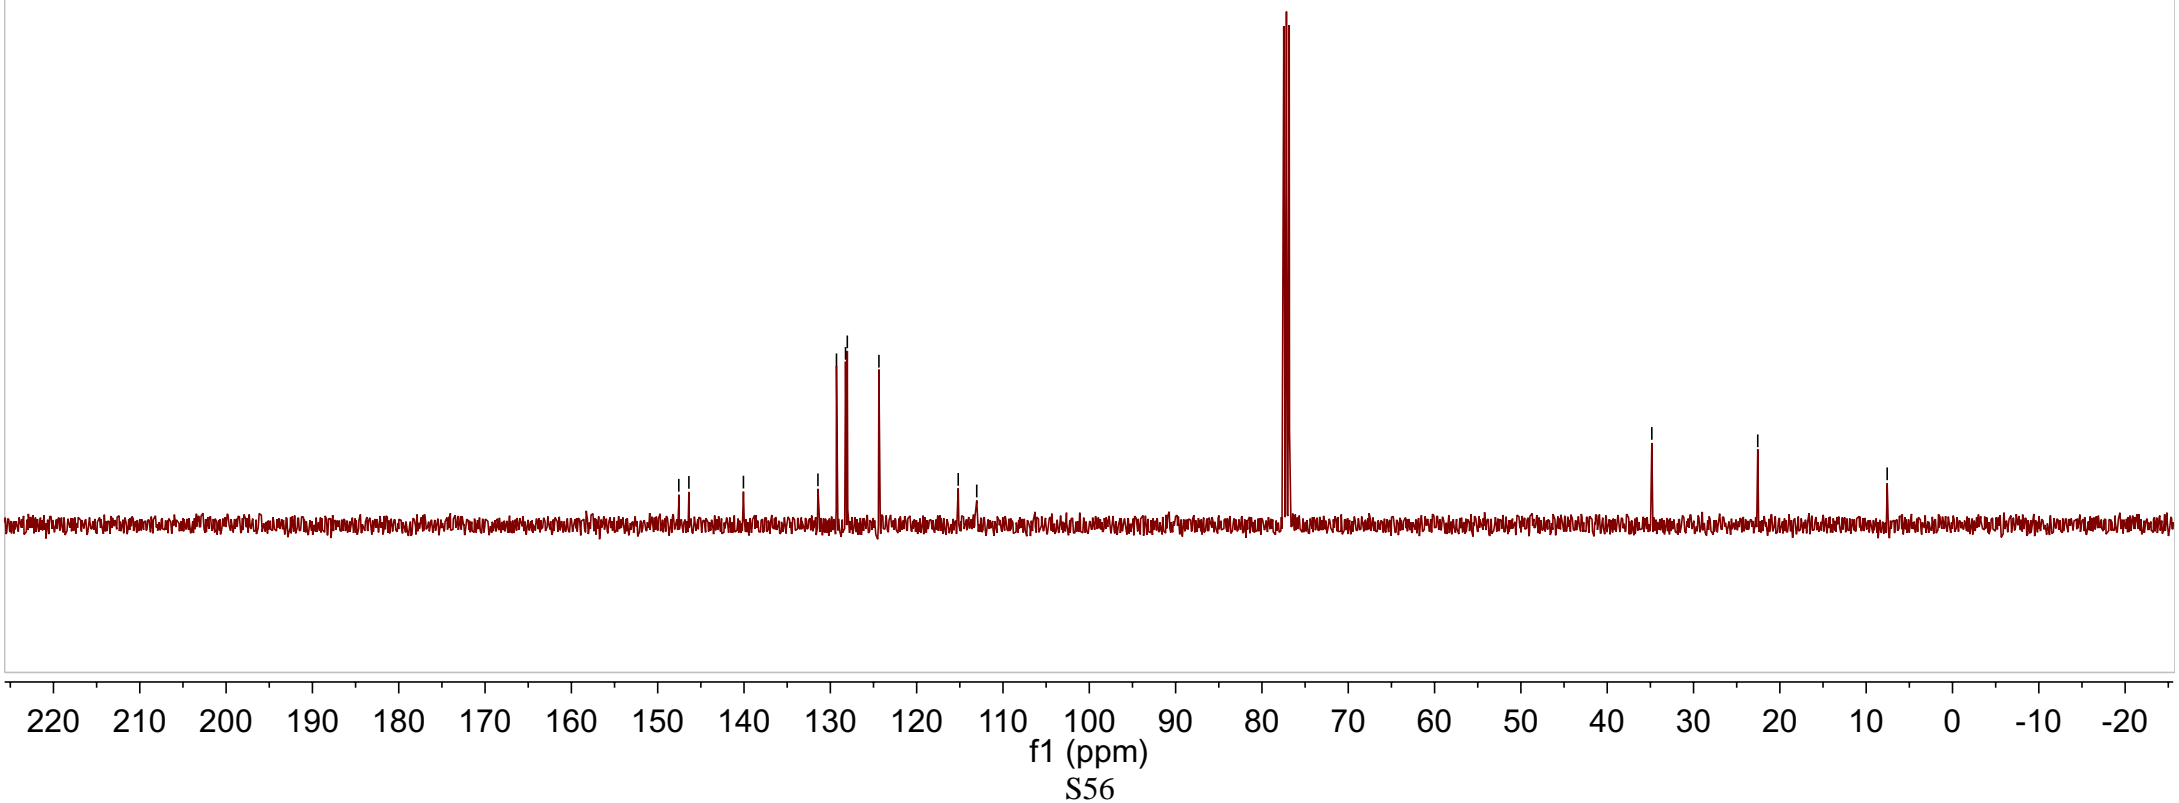



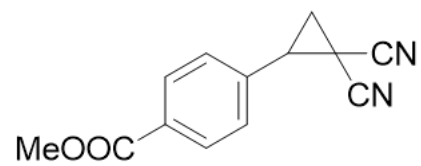

**1w**

(500 MHz, CDCl<sub>3</sub>)

8.11  
8.09  
7.39  
7.39  
7.38  
7.37

3.93  
3.35  
3.34  
3.32  
2.32  
2.30  
1.57

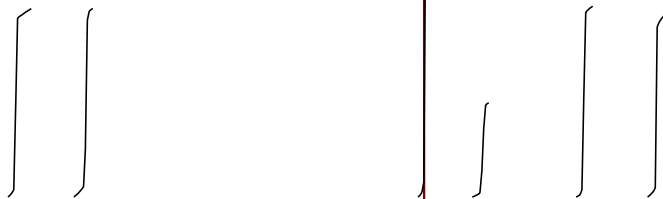

2.00  
2.00  
3.03  
1.00  
2.02  
1.94

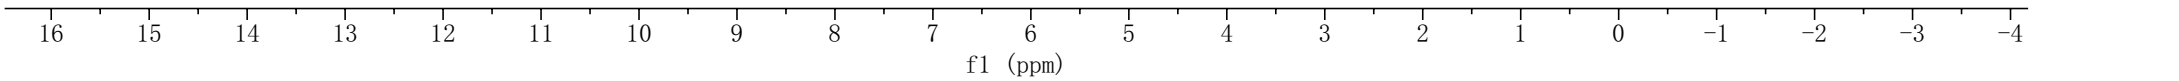

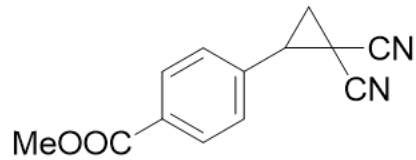

**1w**

(125 MHz, CDCl<sub>3</sub>)

—166.33

135.49

131.45

130.50

128.57

115.05

112.76

—52.53

—34.73

—22.57

—7.61

210

200

190

180

170

160

150

140

130

120

110

100

90

80

70

60

50

40

30

20

10

0

-10

f1 (ppm)

S58

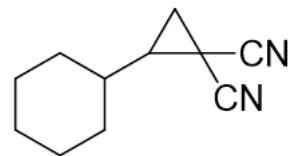

**1z**

(500 MHz, CDCl<sub>3</sub>)

2.02  
2.02  
2.00  
1.99  
1.90  
1.89  
1.88  
1.87  
1.81  
1.80  
1.79  
1.79  
1.78  
1.78  
1.77  
1.77  
1.76  
1.76  
1.76  
1.71  
1.71  
1.70  
1.70  
1.69  
1.69  
1.68  
1.68  
1.68  
1.55  
1.54  
1.53  
1.52  
1.31  
1.29  
1.29  
1.28  
1.28  
1.28  
1.27  
1.27  
1.26  
1.26  
1.25  
1.25  
1.25  
1.24  
1.24  
1.24  
1.23  
1.23  
1.22  
1.21  
1.20  
1.05

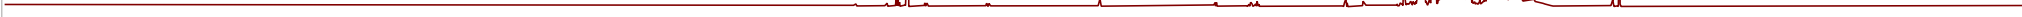

f1 (ppm)

S59

0.94  
1.00  
3.84  
1.16  
0.99  
0.99  
5.17  
0.96

16 15 14 13 12 11 10 9 8 7 6 5 4 3 2 1 0 -1 -2 -3 -4

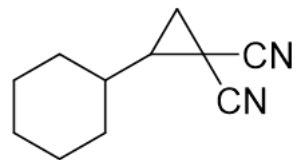

**1z**

(125 MHz, CDCl<sub>3</sub>)

115.79  
114.12

39.90  
37.15  
31.92  
31.88  
25.92  
25.73  
25.46  
24.13

-3.30

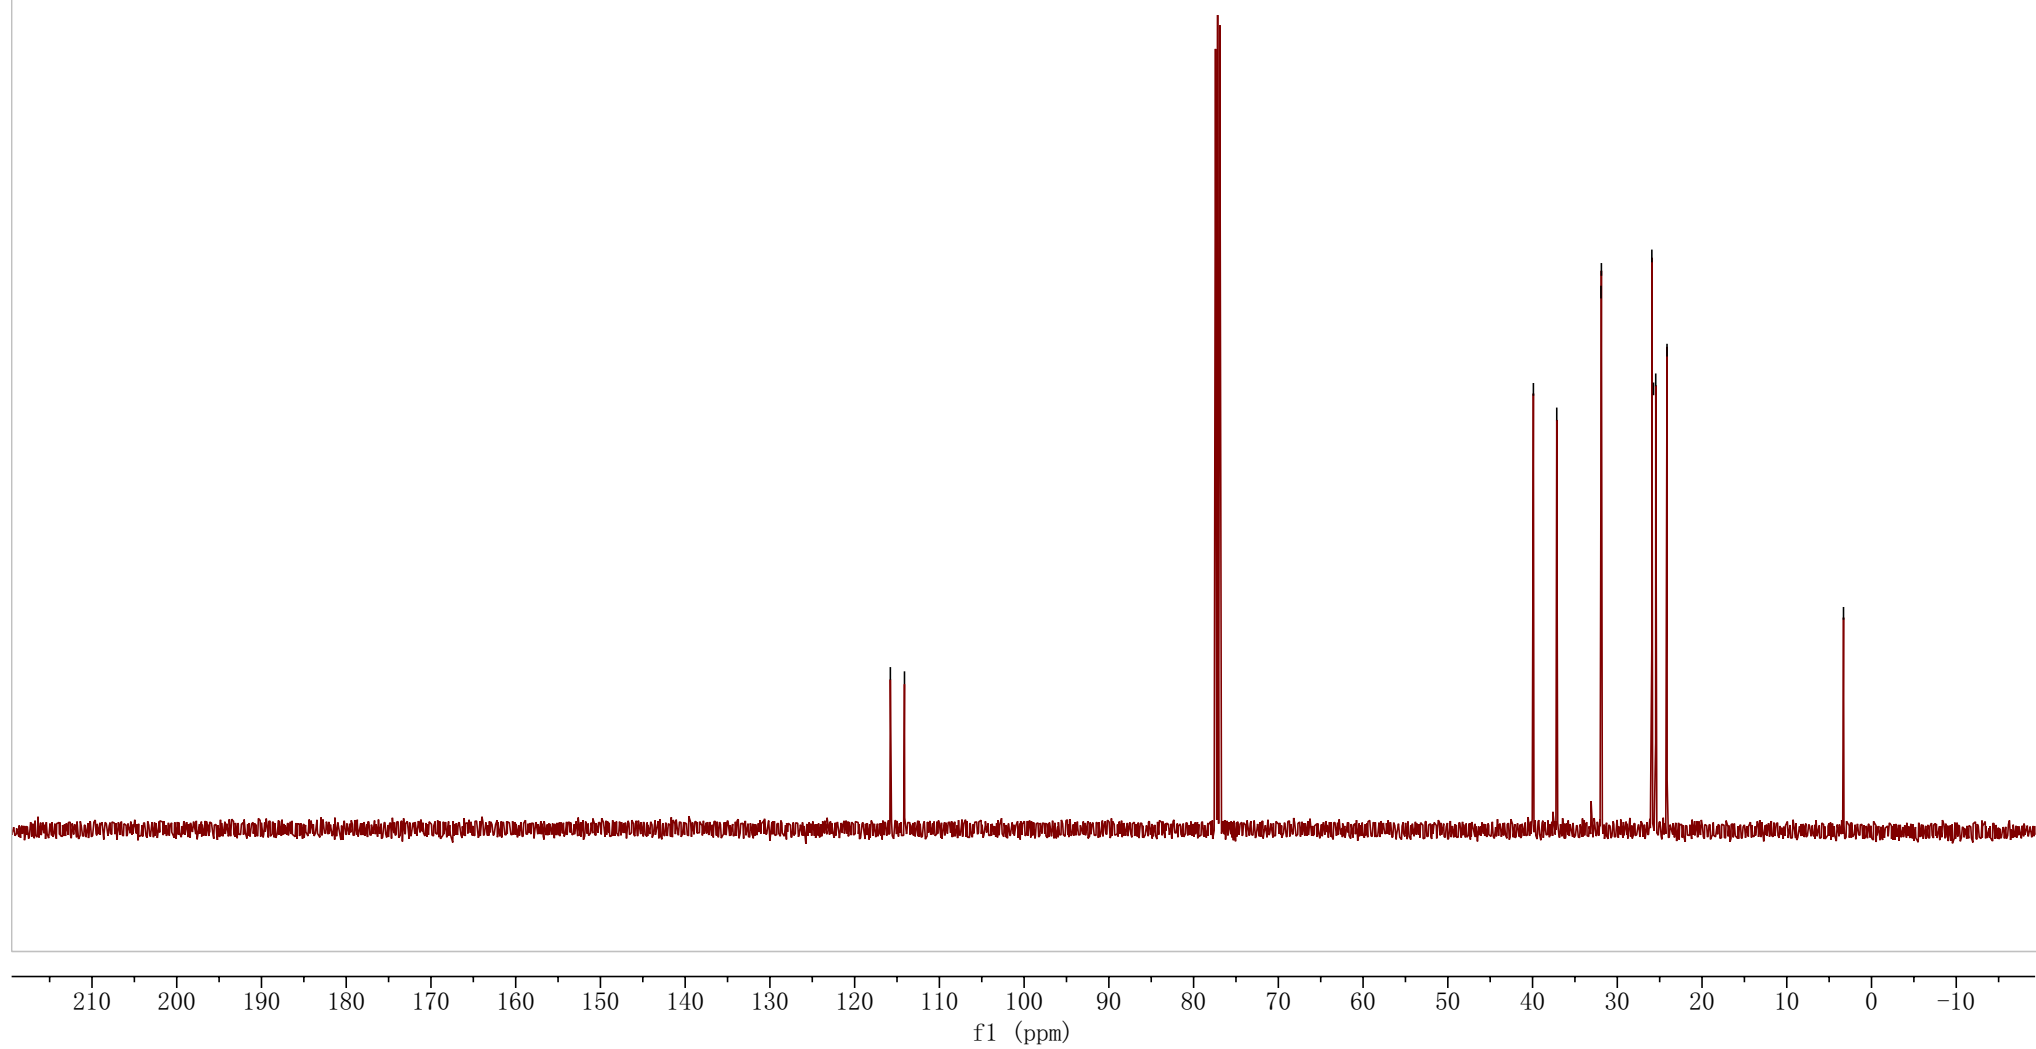

S60

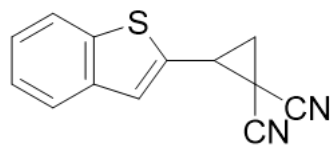

**3b**

(600 MHz, CDCl<sub>3</sub>)

7.83  
7.83  
7.82  
7.82  
7.82  
7.81  
7.80  
7.78  
7.78  
7.77  
7.77  
7.77  
7.76  
7.76  
7.40  
7.40  
7.40  
7.39  
7.39  
7.39  
7.38  
7.38  
7.37  
7.29  
3.49  
3.48  
3.46  
2.39  
2.38  
2.37  
2.36  
2.35  
2.34  
2.33  
2.32

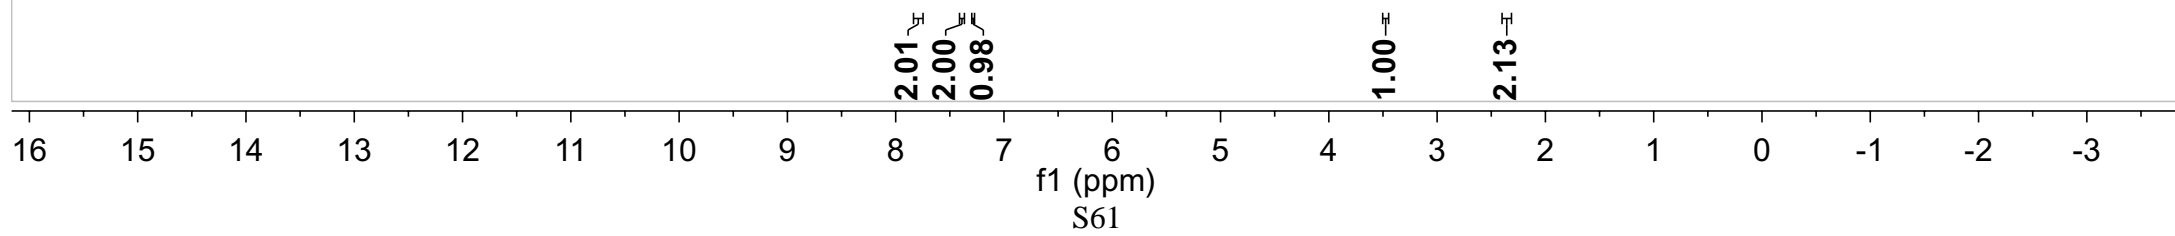

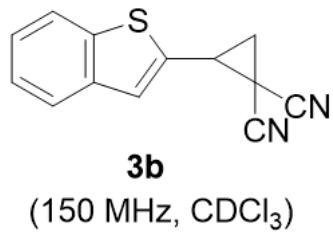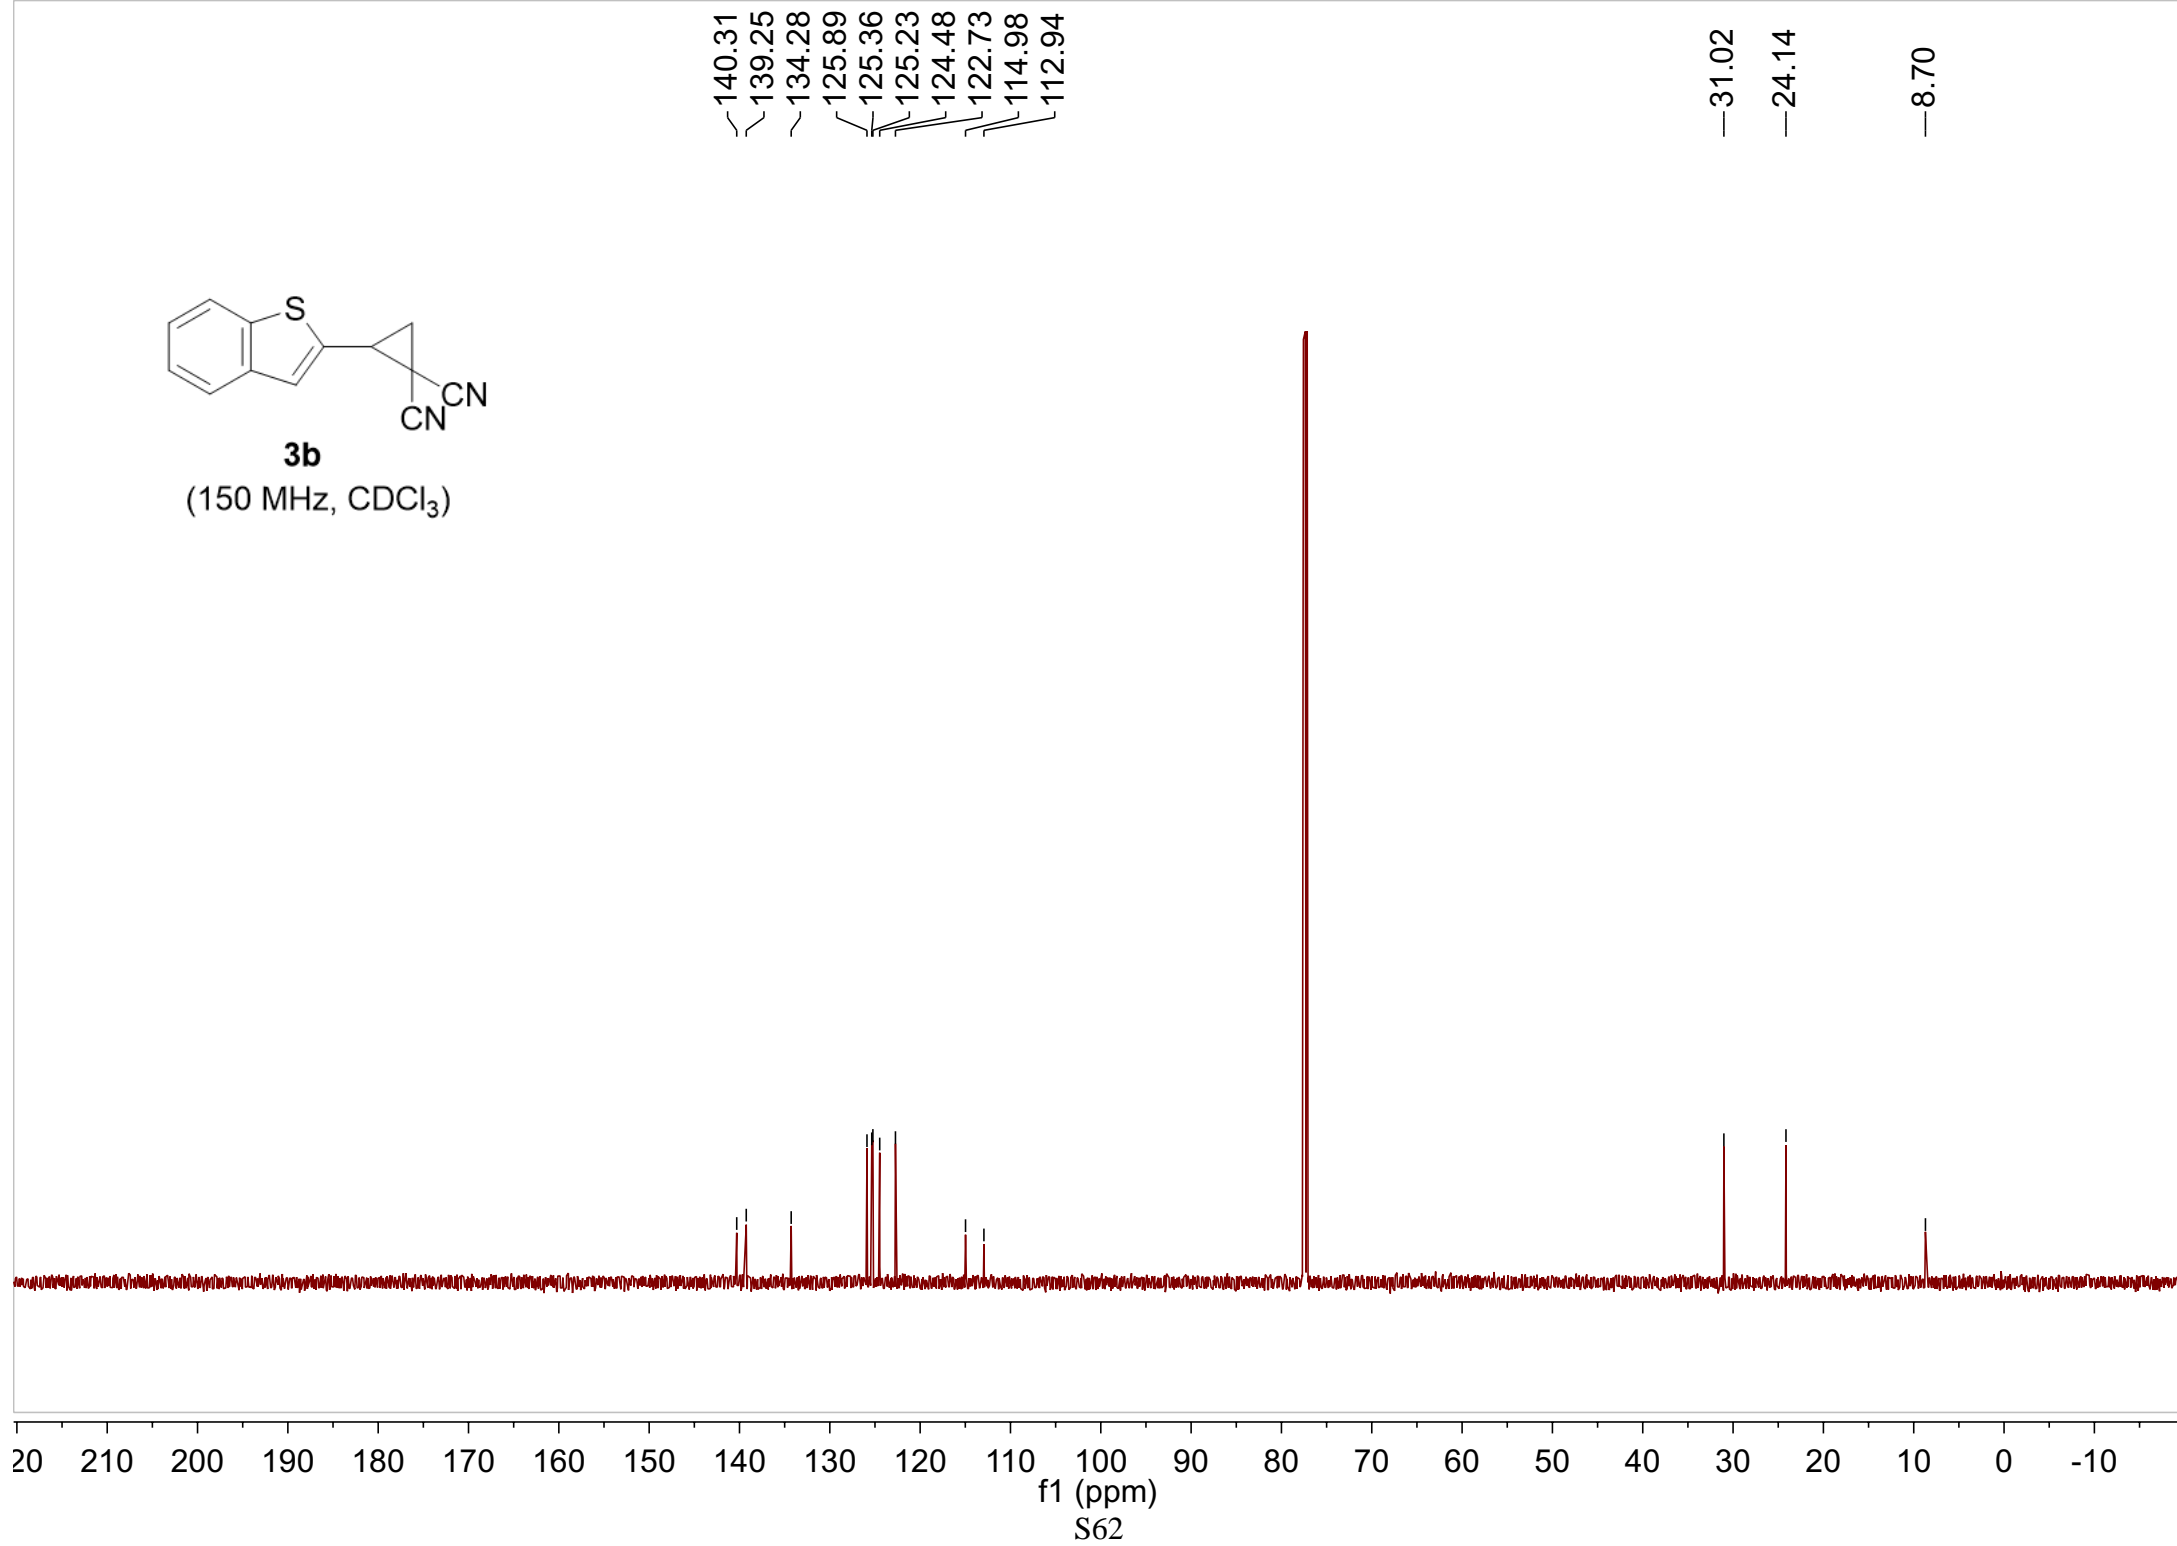

7.57  
7.57  
7.57  
7.56  
7.56  
7.56  
7.48  
7.48  
7.48  
7.47  
7.47  
7.47  
7.46  
7.35  
7.34  
7.33  
7.33  
7.33  
7.32  
7.32  
7.27  
7.27  
7.26  
7.26  
7.25  
7.25  
7.24  
7.24  
6.82  
6.82  
6.82  
3.39  
3.39  
3.38  
3.38  
3.38  
3.36  
3.36  
2.45  
2.44  
2.44  
2.43  
2.31  
2.30  
2.29  
2.28

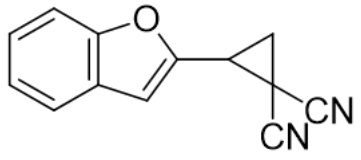

**3c**  
(600 MHz, CDCl<sub>3</sub>)

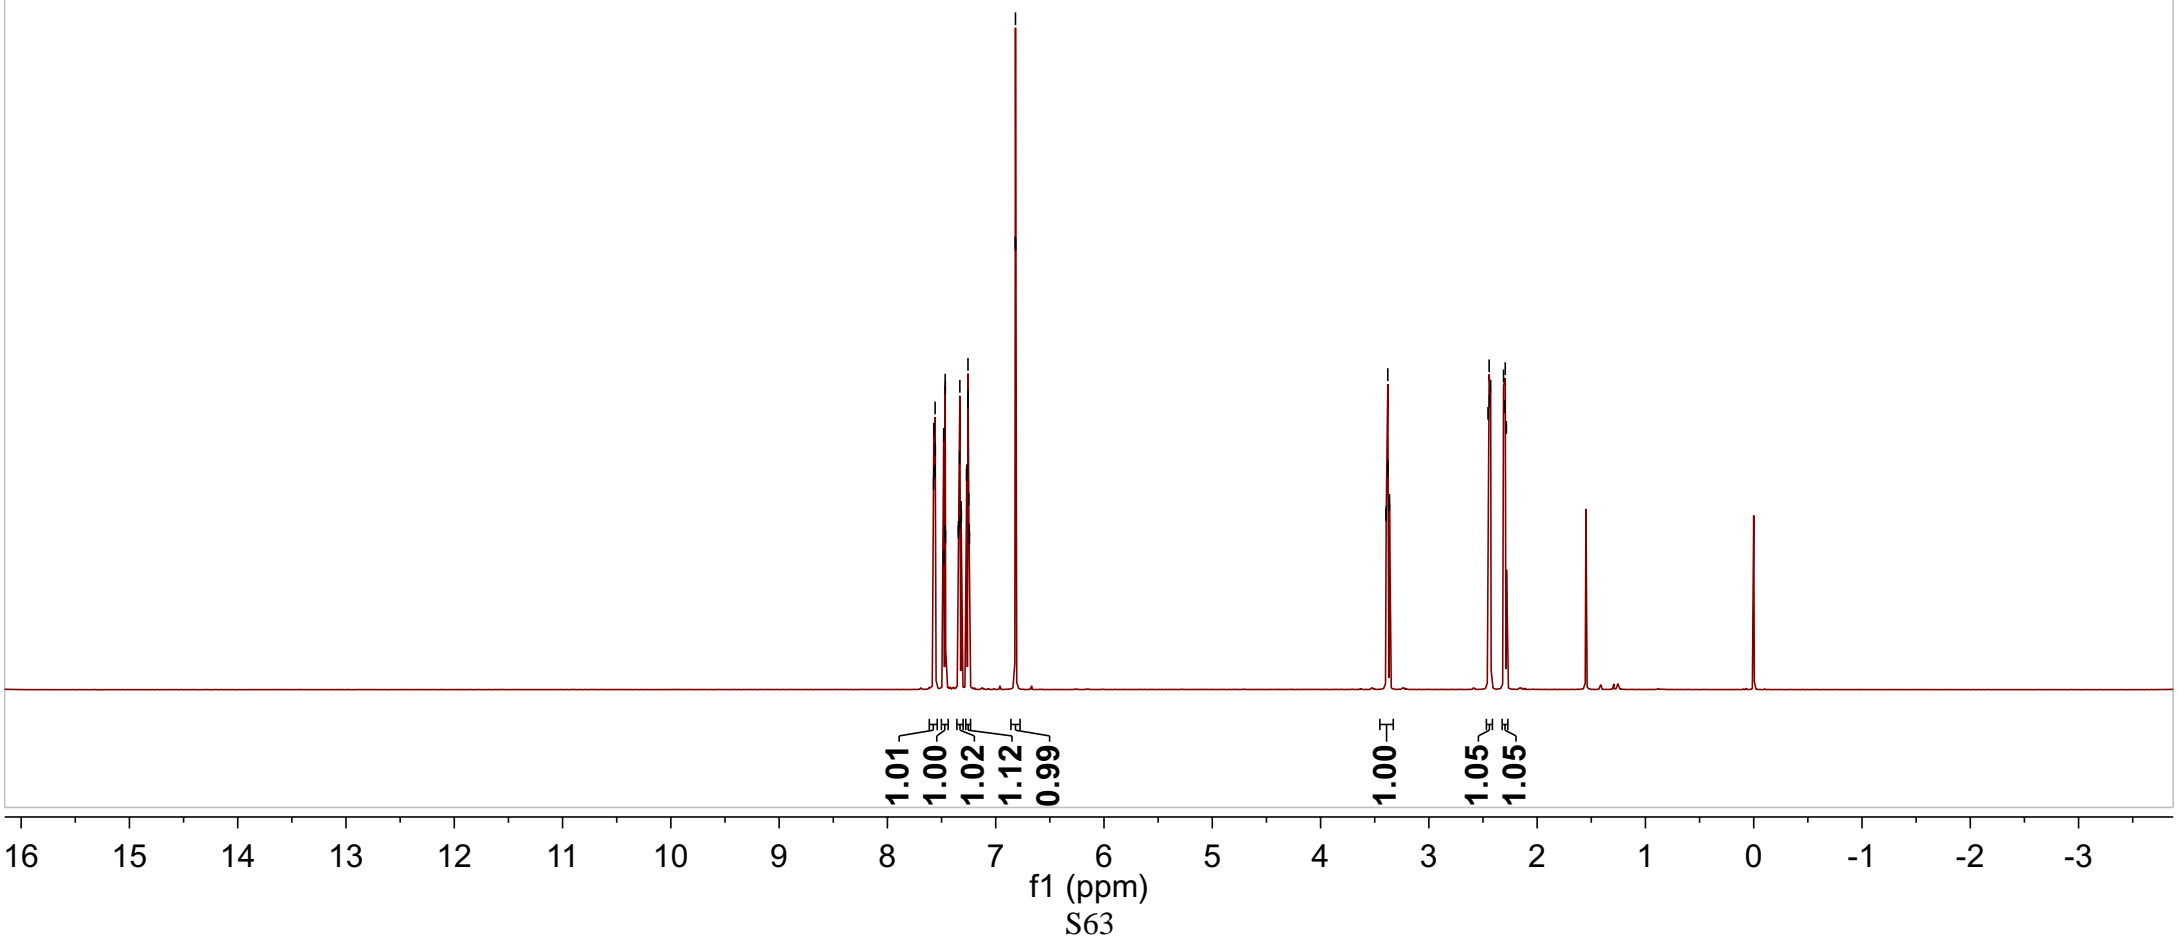

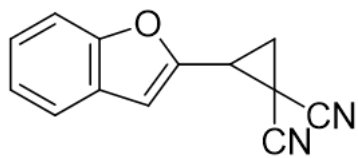

**3c**

(150 MHz, CDCl<sub>3</sub>)

—155.21

—147.34

127.49

125.59

123.56

121.45

114.49

112.64

111.46

107.88

—28.81

—21.78

—7.26

20 210 200 190 180 170 160 150 140 130 120 110 100 90 80 70 60 50 40 30 20 10 0 -10 -2

f1 (ppm)  
S64



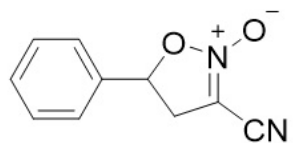

**2a**  
(500MHz, CDCl<sub>3</sub>)

7.48  
7.47  
7.46  
7.45  
7.43  
7.40  
7.40  
7.39  
5.91  
5.89  
5.87  
3.73  
3.71  
3.70  
3.68  
3.42  
3.40  
3.38  
3.37

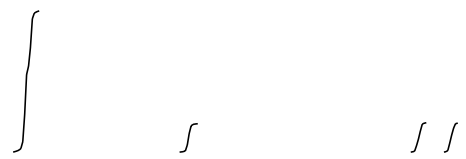

4.97  
1.00  
1.03  
1.02

16 15 14 13 12 11 10 9 8 7 6 5 4 3 2 1 0 -1 -2 -3 -4

f1 (ppm)  
S65

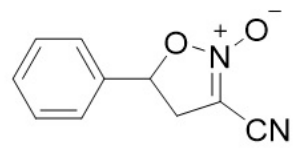

**2a**  
(125MHz, CDCl<sub>3</sub>)

~136.08  
~130.07  
~129.49  
~126.03

—109.77

—92.78

—80.27

—37.38

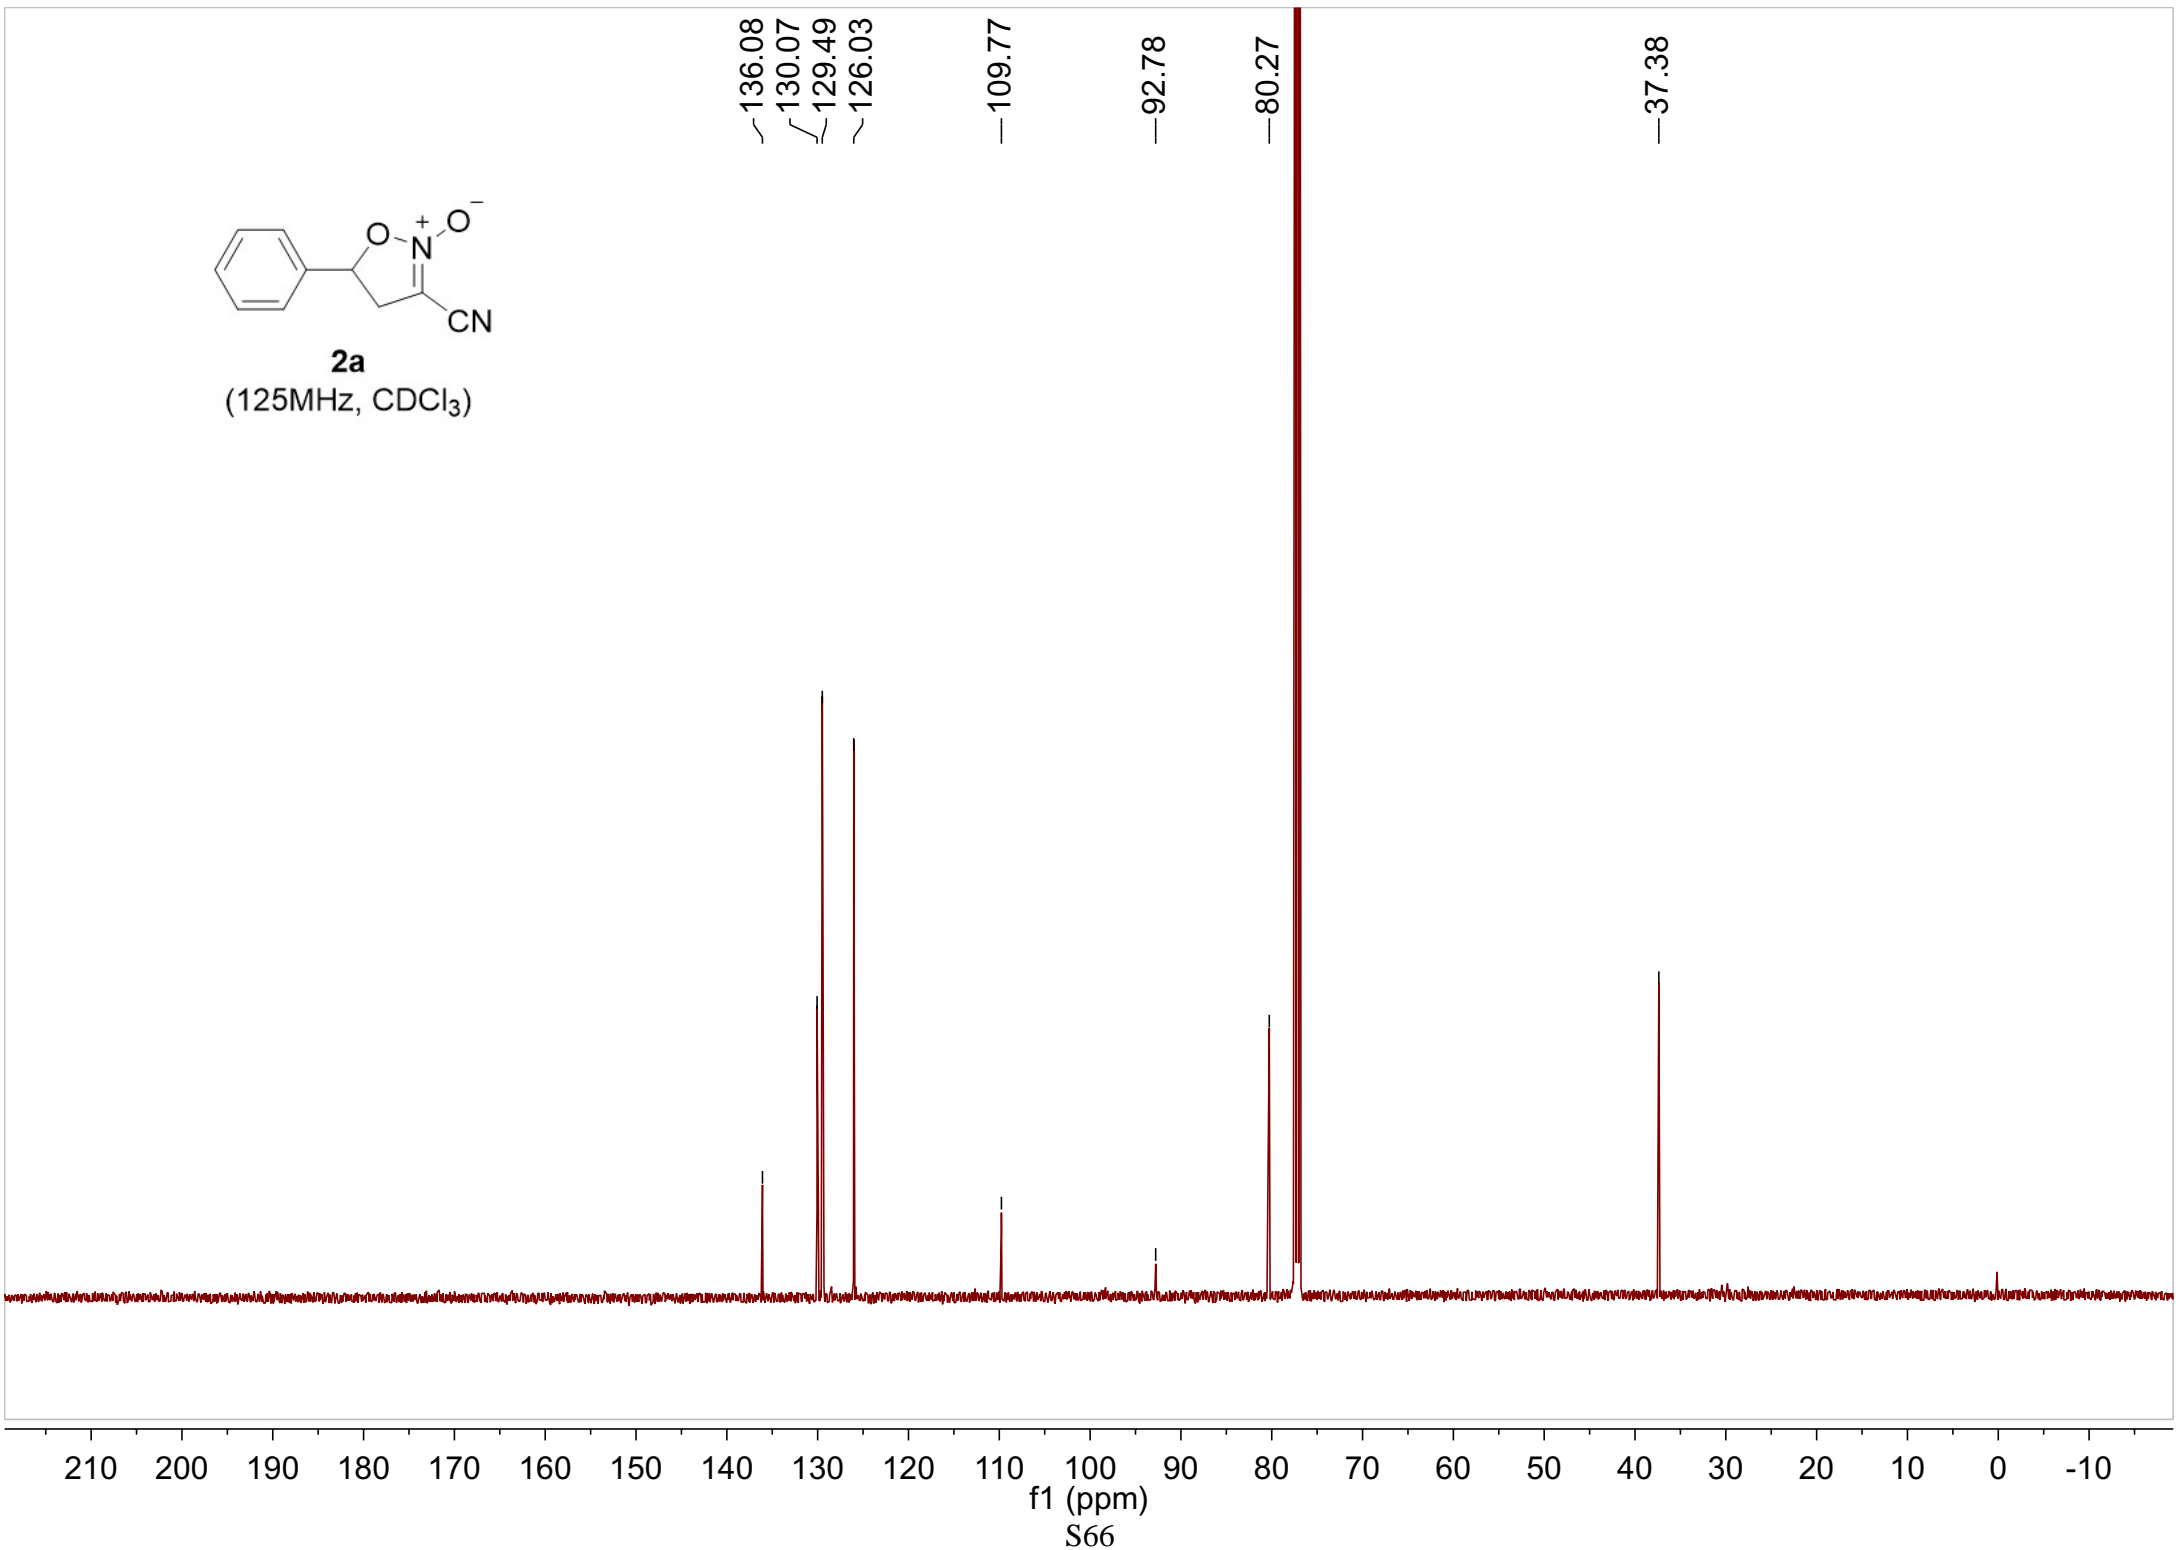

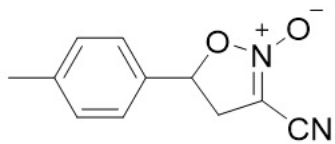

**2b**

(600MHz, CDCl<sub>3</sub>)

7.29  
7.27  
7.26  
7.25  
5.87  
5.85  
5.84  
3.67  
3.66  
3.65  
3.63  
3.40  
3.39  
3.37  
3.36  
-2.38

-0.00

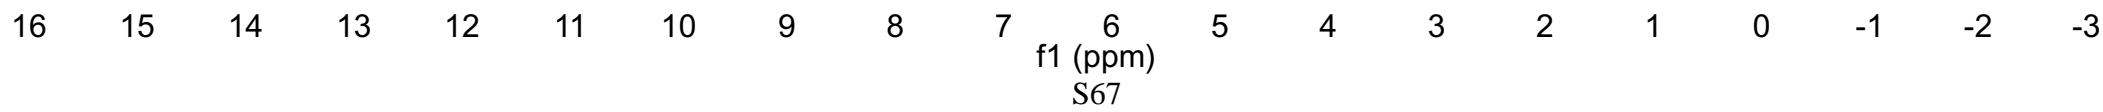

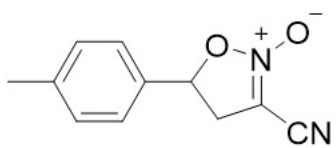

**2b**  
(100MHz, CDCl<sub>3</sub>)

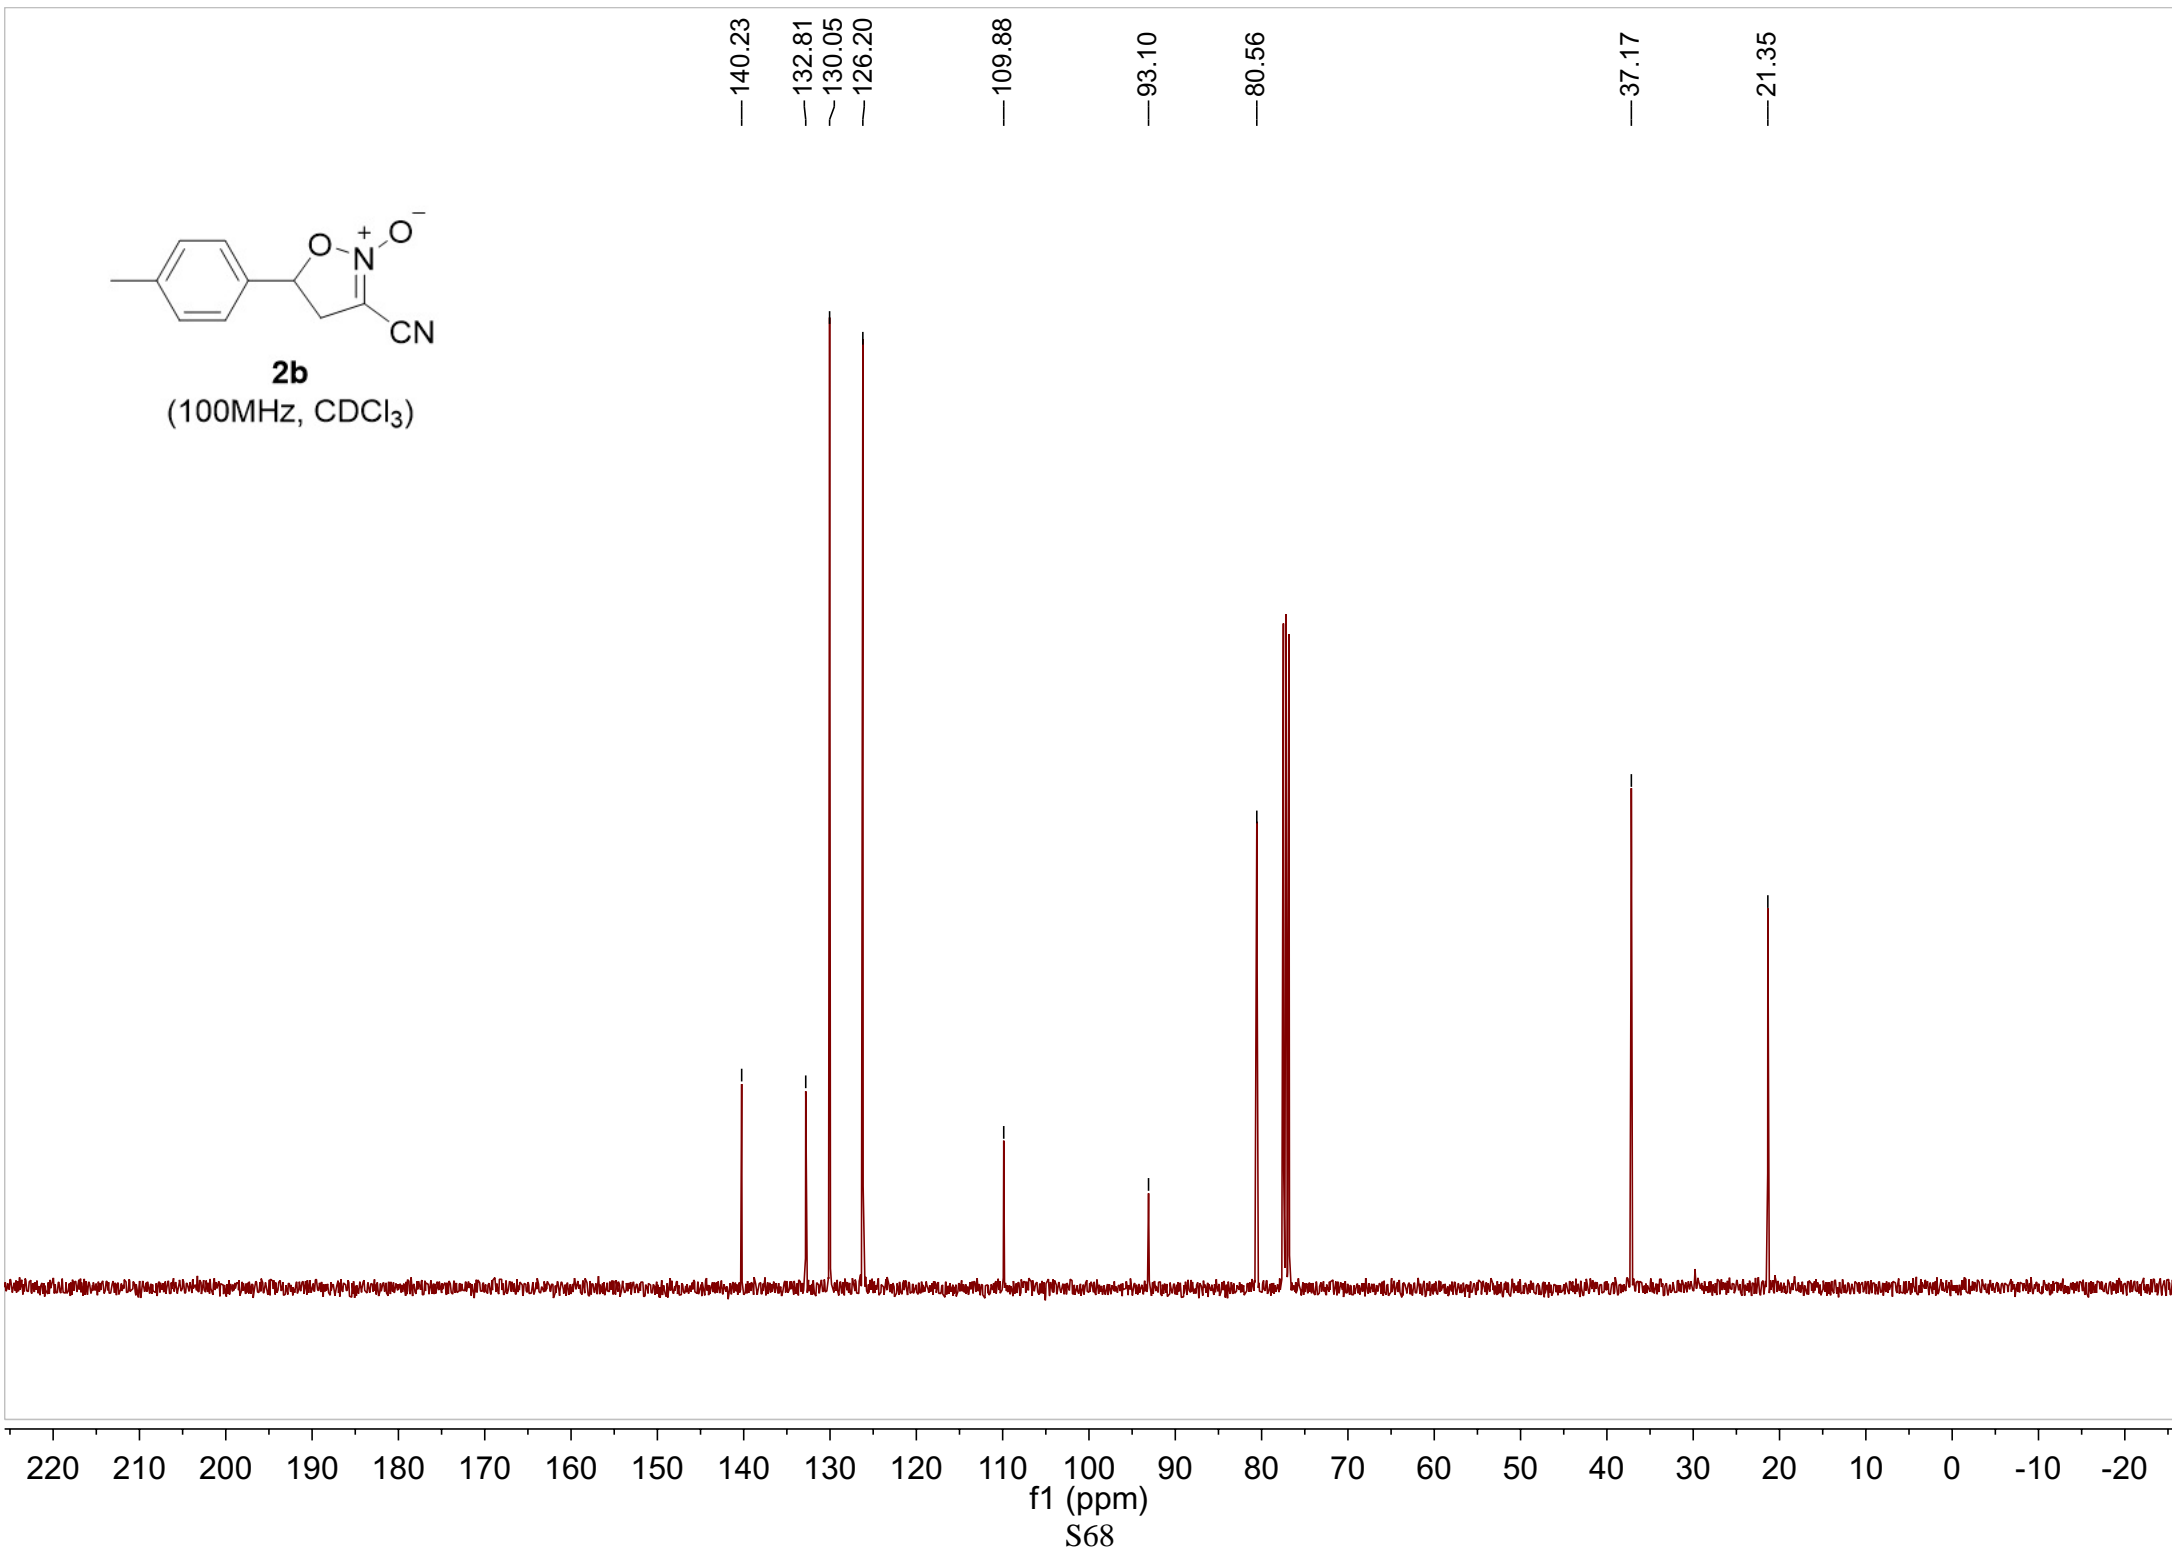

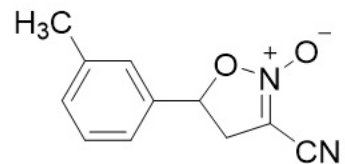

**2c**

(400MHz, CDCl<sub>3</sub>)

7.35  
7.33  
7.32  
7.26  
7.25  
7.23  
7.20  
7.18  
7.17  
5.87  
5.85  
5.83  
3.71  
3.69  
3.67  
3.65  
3.41  
3.39  
3.37  
3.35  
2.39  
2.39

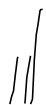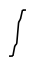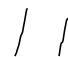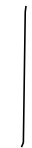

1.00  
1.02  
2.01

0.98

1.02  
1.01

3.00

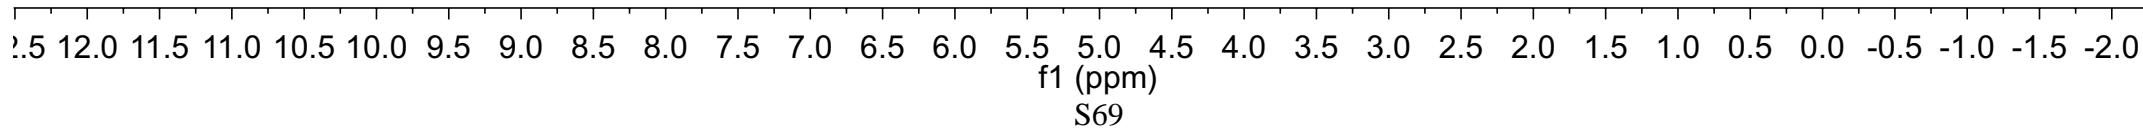

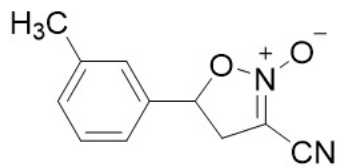

**2c**

(150MHz, CDCl<sub>3</sub>)

139.40  
135.97  
130.76  
129.31  
126.61  
123.12

109.84

92.95

80.41

37.29

21.53

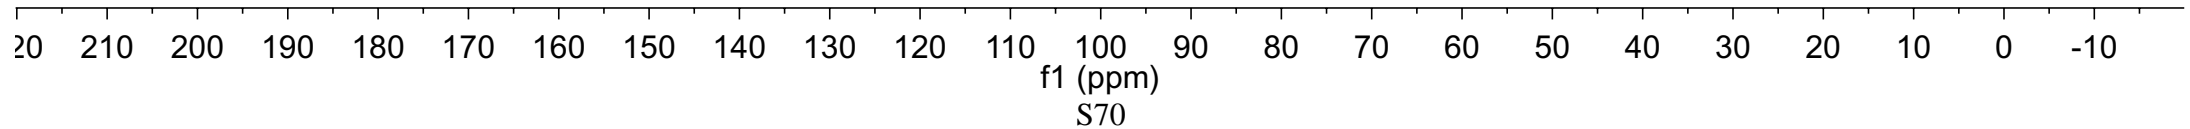

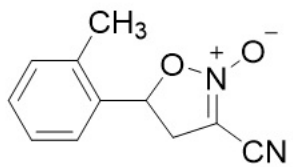

**2d**  
(400MHz, CDCl<sub>3</sub>)

7.45  
7.44  
7.44  
7.44  
7.43  
7.43  
7.34  
7.33  
7.32  
7.32  
7.31  
7.30  
7.25  
7.25  
7.24  
7.24  
7.24  
7.23  
7.23  
6.12  
6.10  
6.10  
6.08

3.75  
3.73  
3.71  
3.69  
3.33  
3.31  
3.29  
3.27  
-2.35

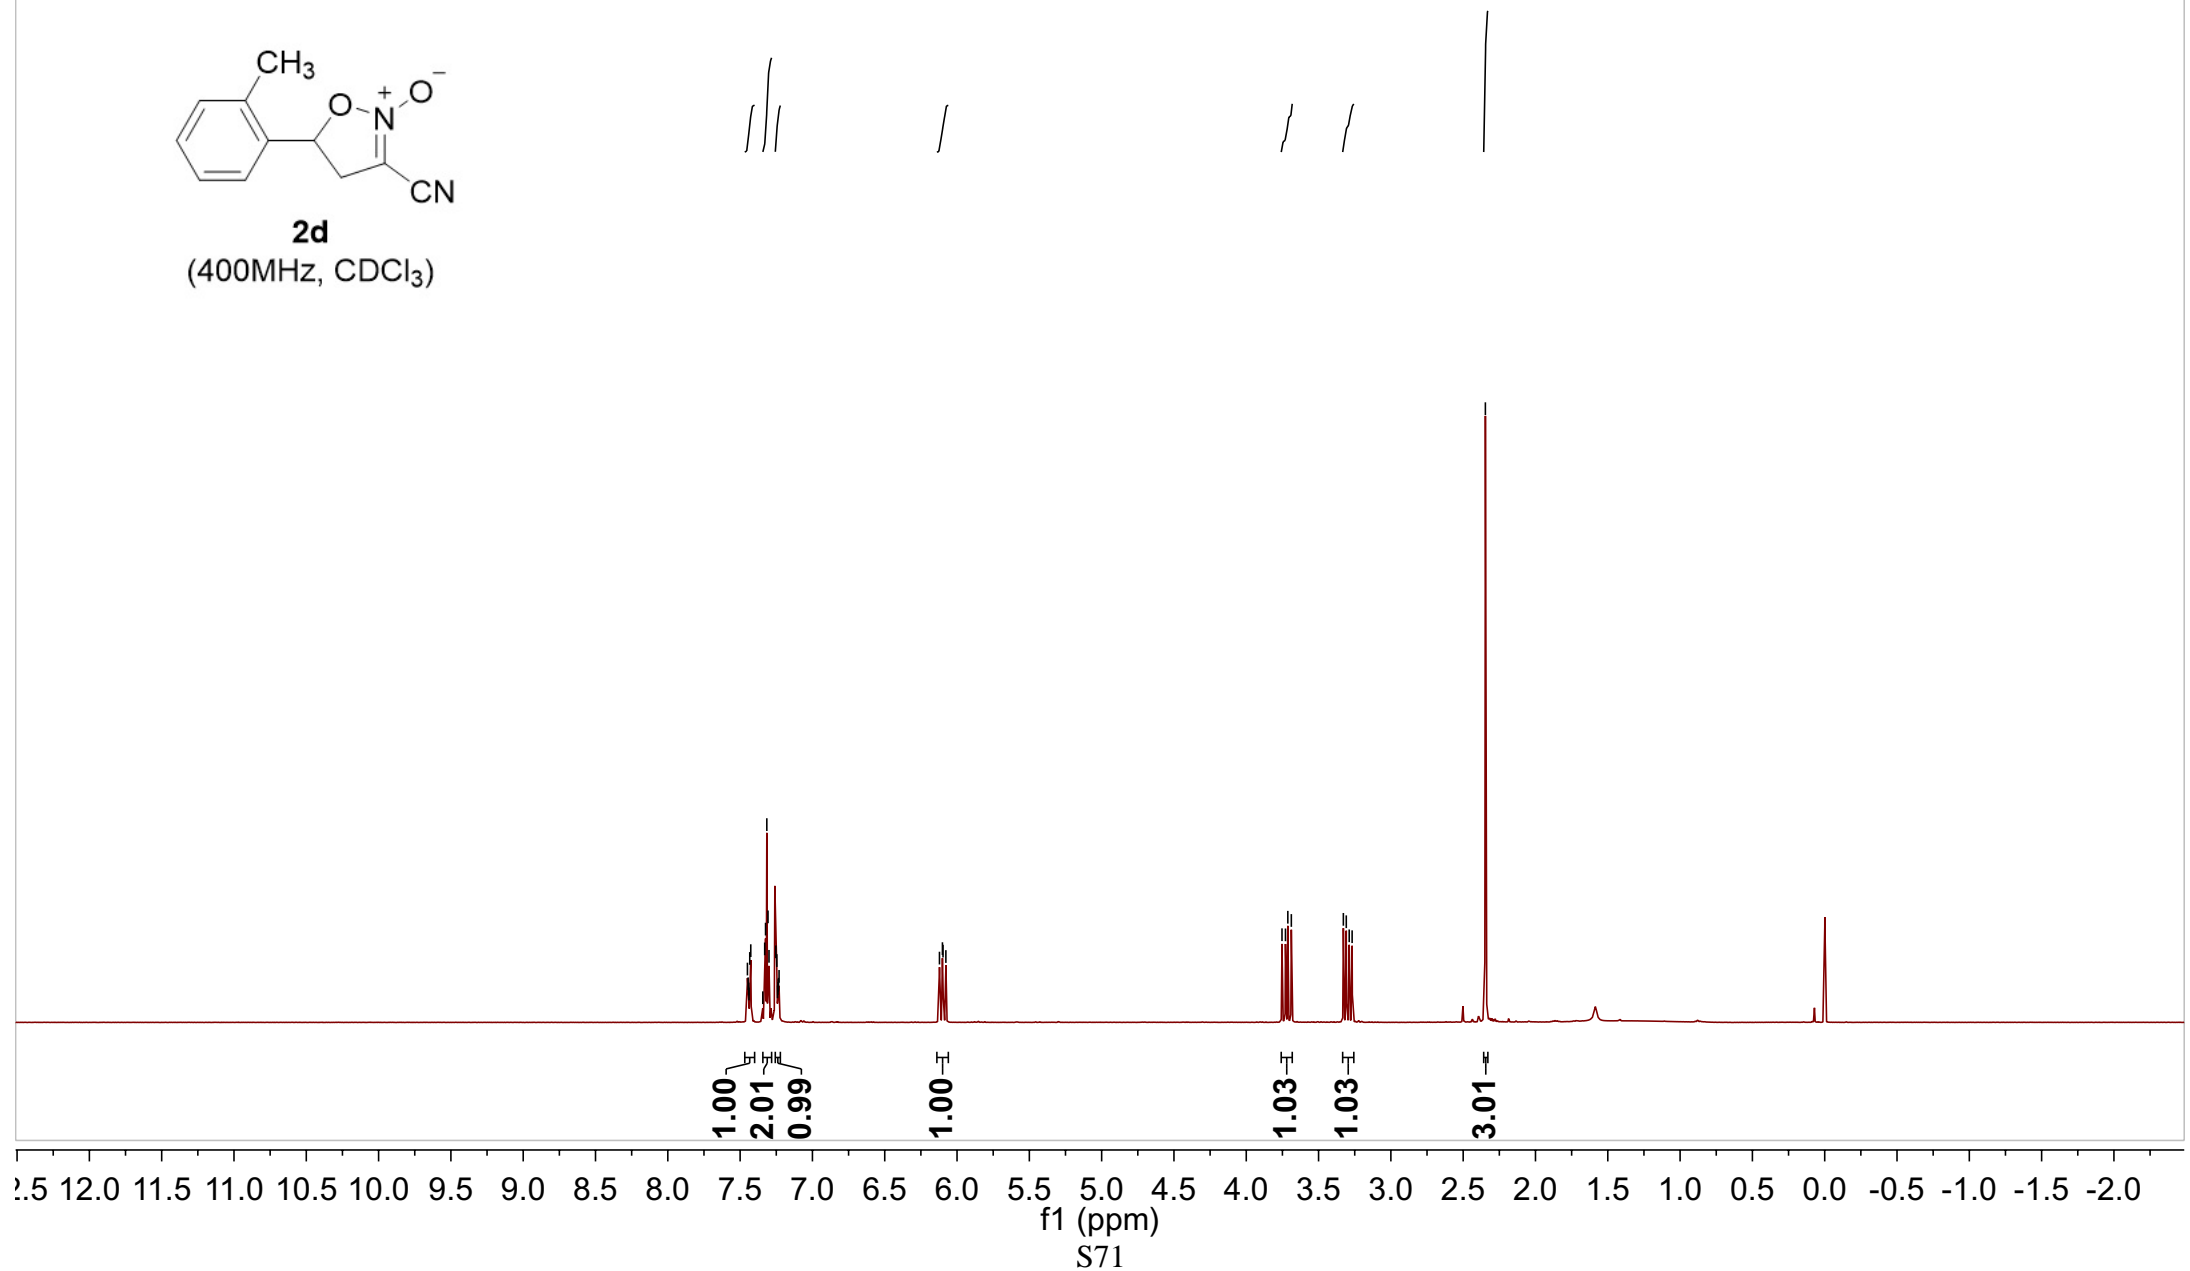

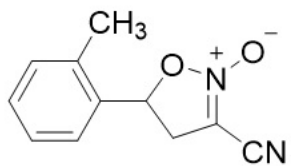

**2d**  
(150MHz, CDCl<sub>3</sub>)

134.90  
134.26  
131.45  
129.67  
127.05  
124.95

109.79

92.82

77.84

36.46

19.11

20 210 200 190 180 170 160 150 140 130 120 110 100 90 80 70 60 50 40 30 20 10 0 -10

f1 (ppm)

S72



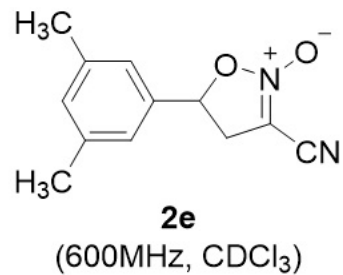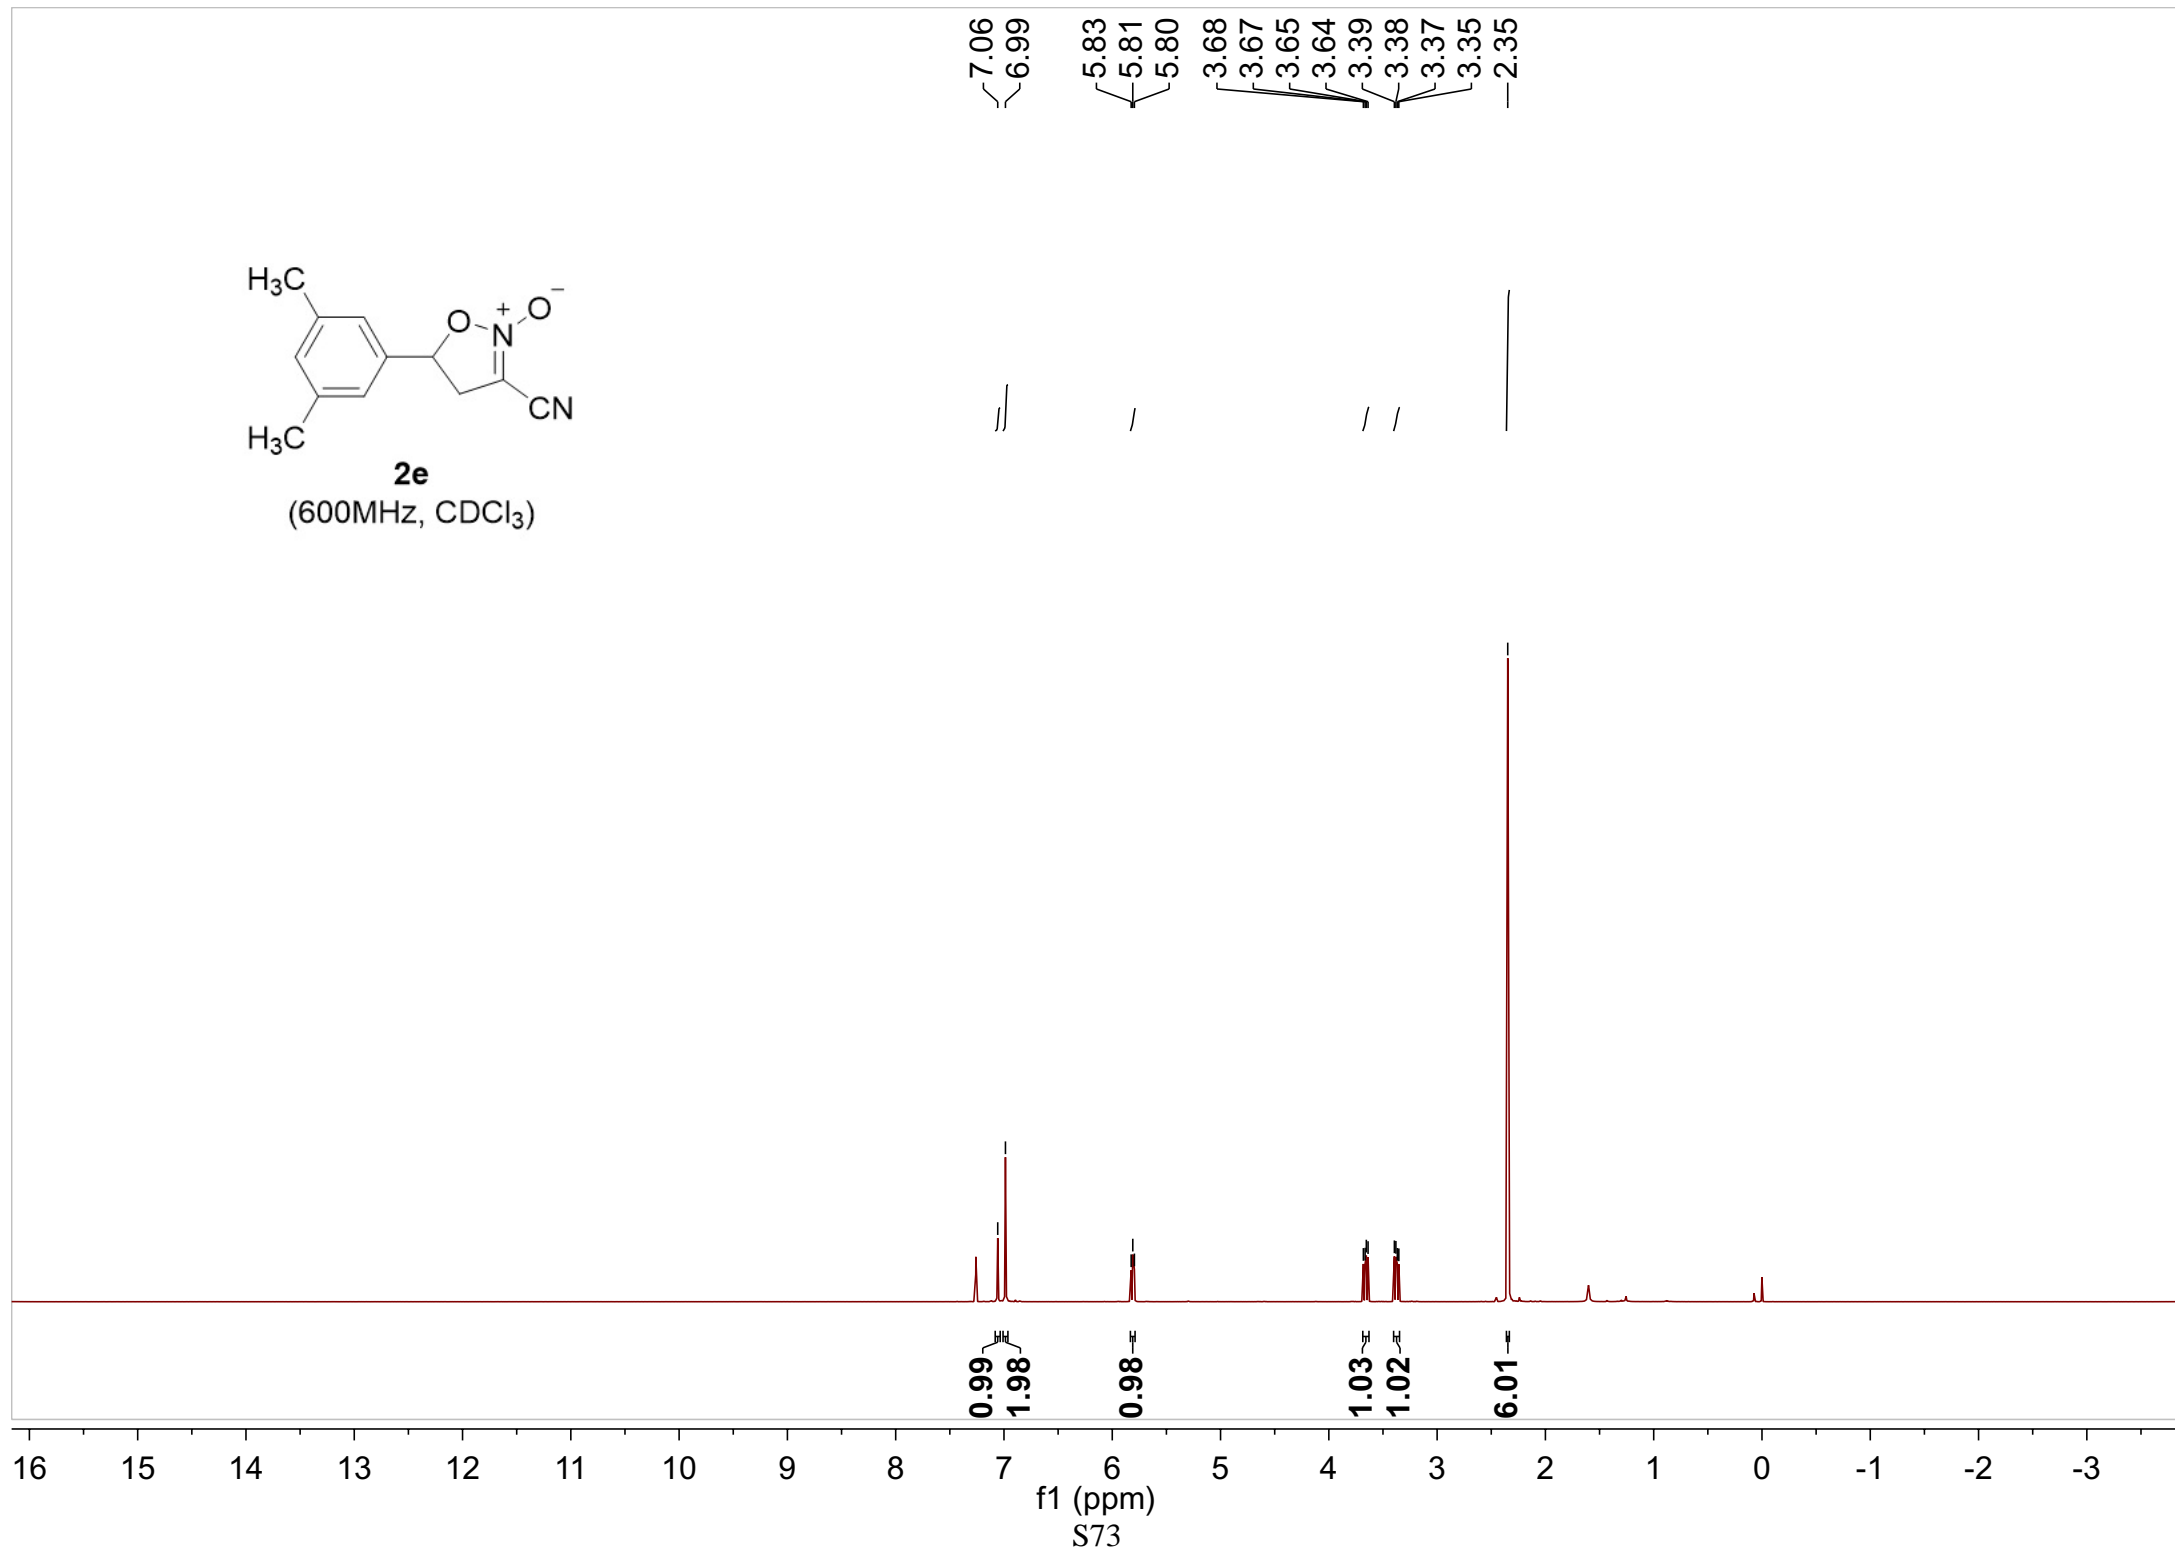

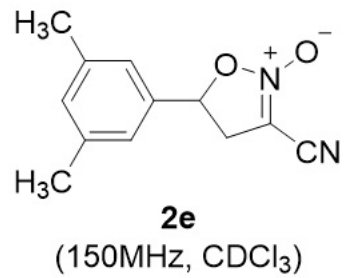

~139.25  
~135.97  
~131.60  
—123.73  
—109.88  
—92.95  
—80.48  
—37.30  
—21.40

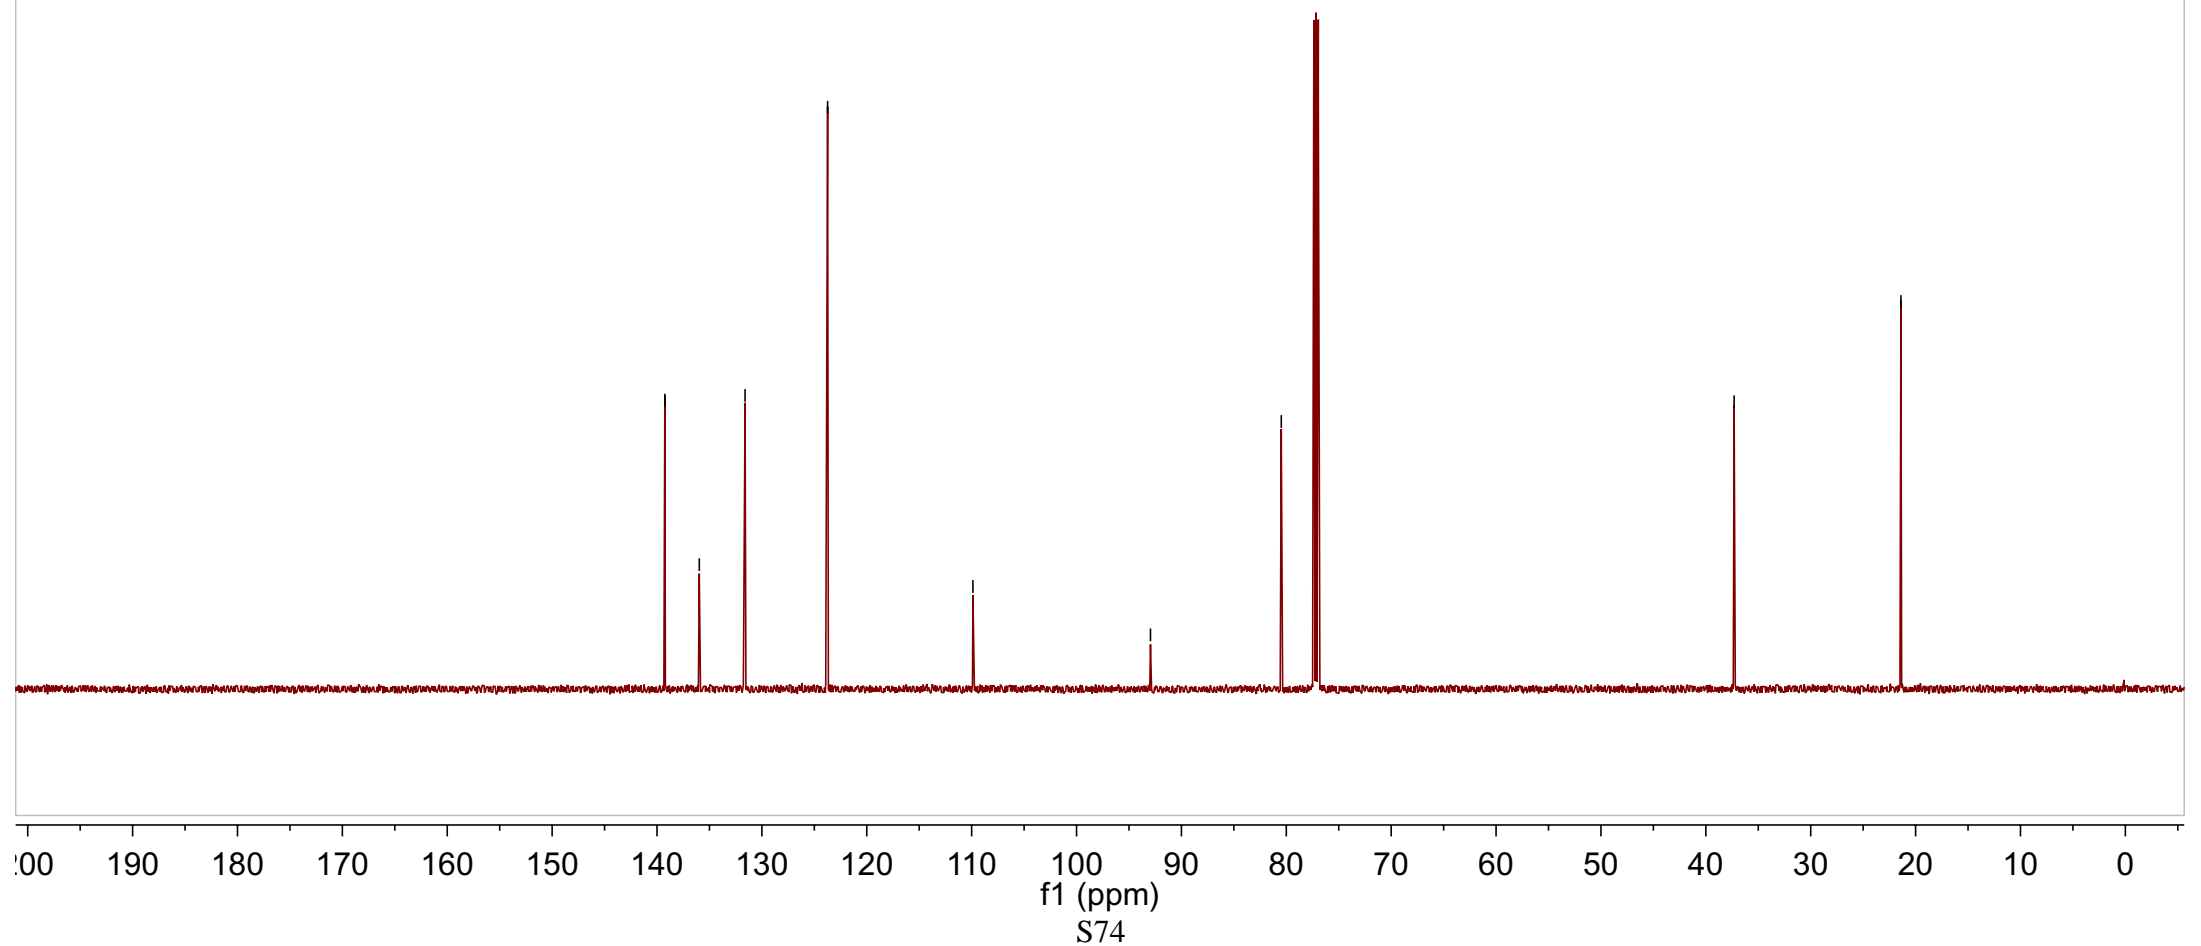

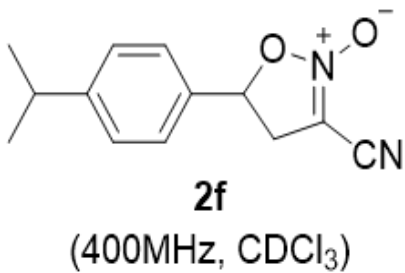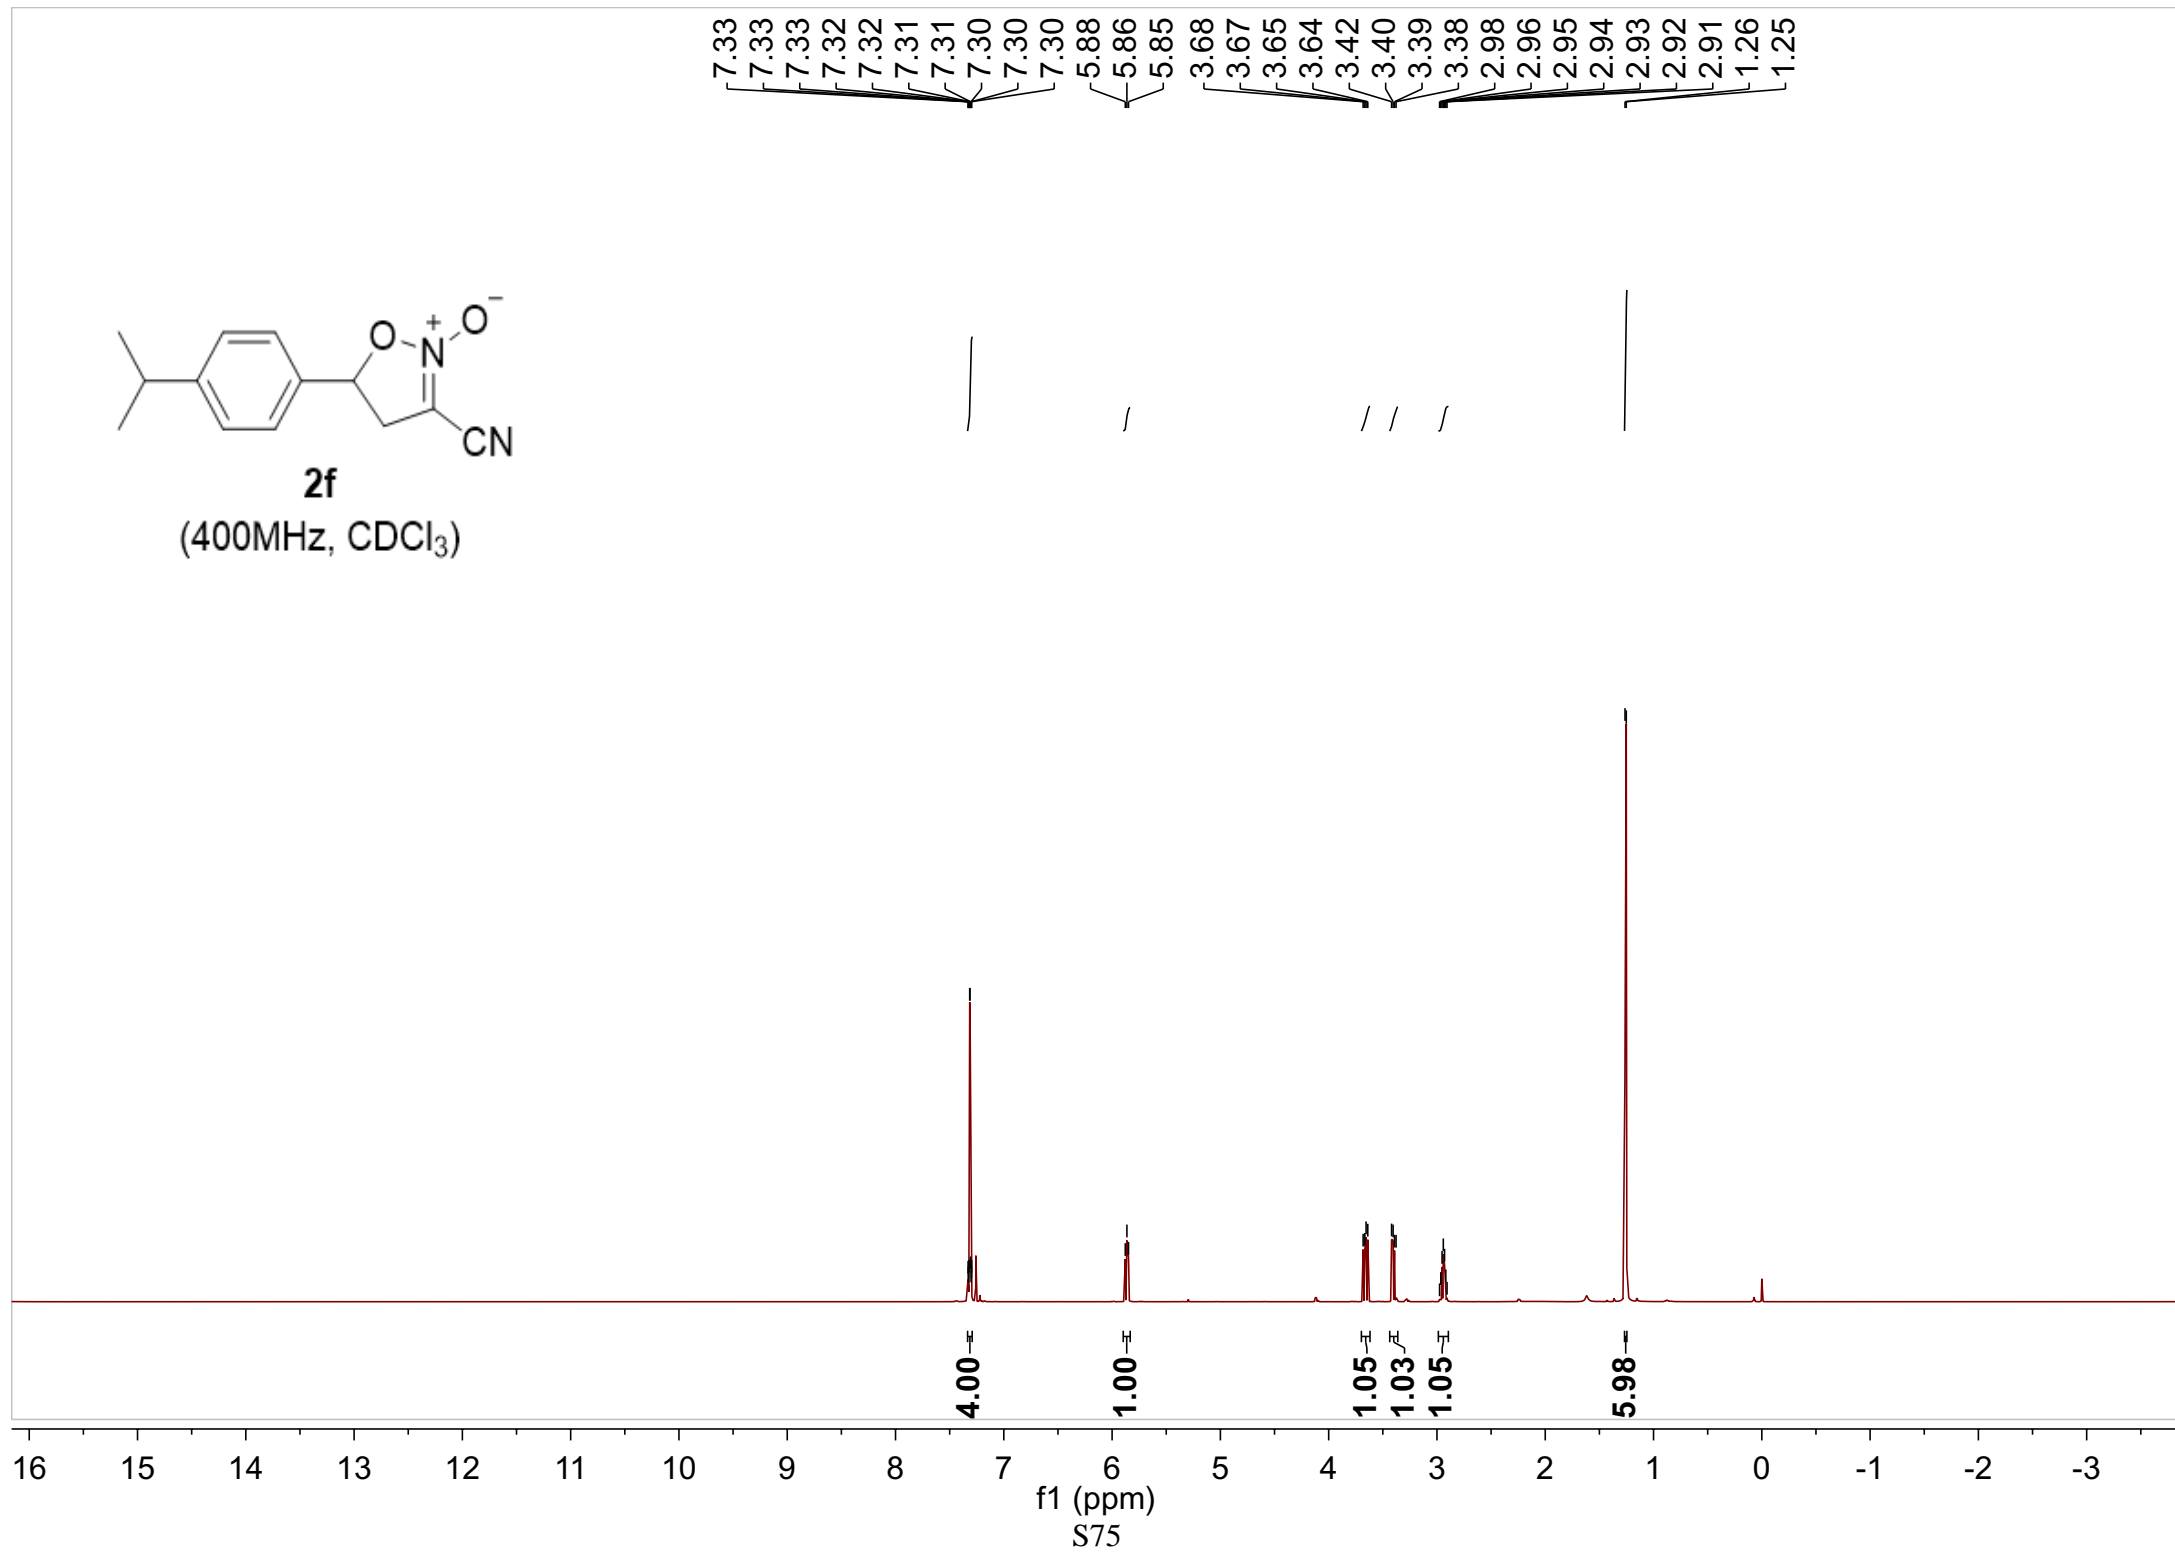

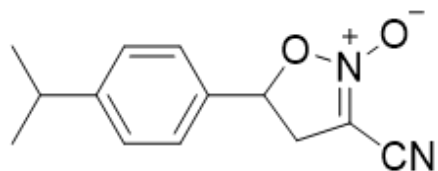

**2f**

(125MHz, CDCl<sub>3</sub>)

—151.15

~133.16

~127.49

~126.29

—109.89

—93.06

—80.54

~37.16

~34.06

—23.95

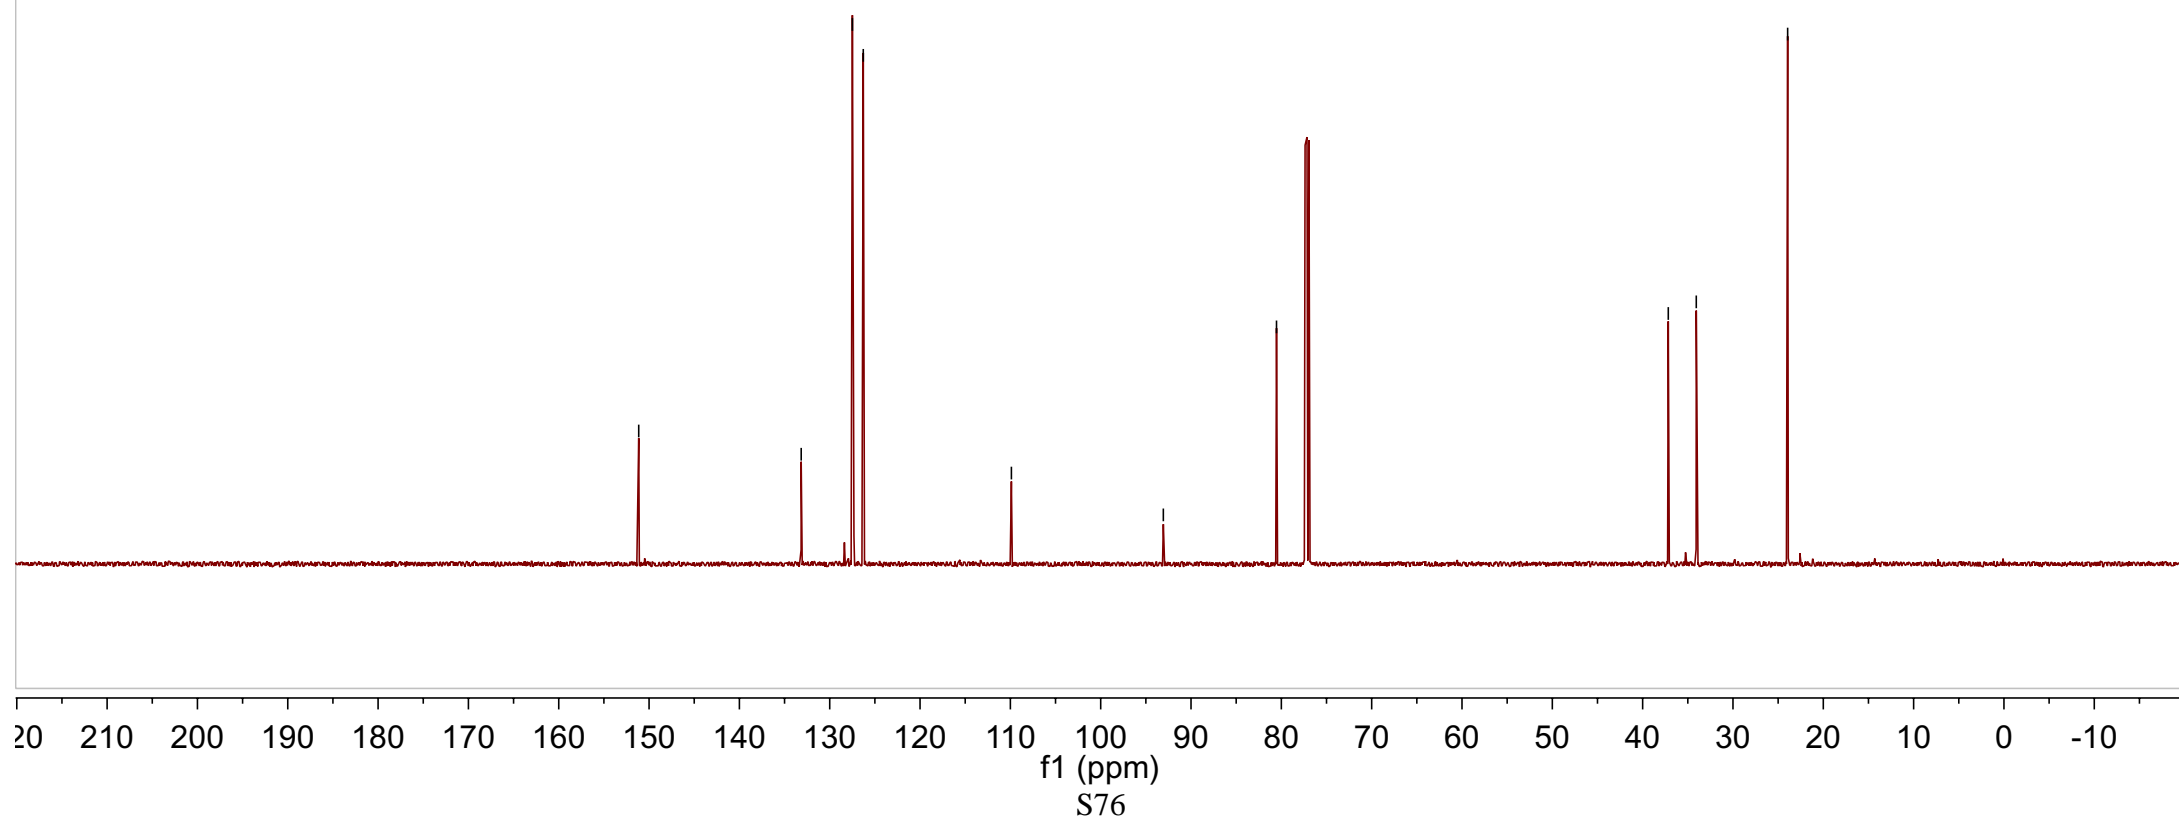

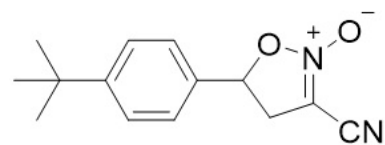

**2g**  
(500MHz, CDCl<sub>3</sub>)

7.48  
7.46  
7.34  
7.32  
5.89  
5.87  
5.85  
3.69  
3.67  
3.66  
3.64  
3.43  
3.41  
3.40  
3.38

//  
s  
//

1.33

2.00  
2.00  
1.00  
1.00  
1.01  
9.06

16 15 14 13 12 11 10 9 8 7 6 5 4 3 2 1 0 -1 -2 -3 -4

f1 (ppm)  
S77

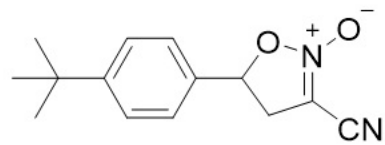

**2g**  
(125MHz, CDCl<sub>3</sub>)

—153.48

~132.85

~126.41

~125.99

—109.87

—92.95

—80.42

~37.20

~34.94

~31.34

210 200 190 180 170 160 150 140 130 120 110 100 90 80 70 60 50 40 30 20 10 0 -10

f1 (ppm)

S78

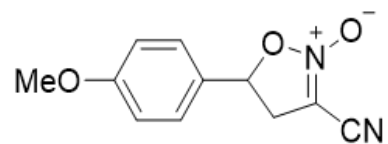

**2h**

(500MHz, CDCl<sub>3</sub>)

7.33 7.33 7.32 7.31 7.30 7.30 6.96 6.95 6.95 6.94 6.93 6.92 5.85 5.82 5.80 3.82 3.64 3.61 3.60 3.57 3.41 3.39 3.37 3.35

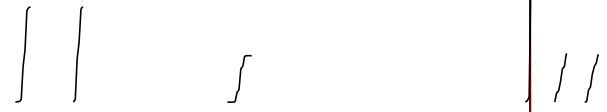

2.00

2.00

0.97

3.00

1.02

1.00

12.0 11.5 11.0 10.5 10.0 9.5 9.0 8.5 8.0 7.5 7.0 6.5 6.0 5.5 5.0 4.5 4.0 3.5 3.0 2.5 2.0 1.5 1.0 0.5 0.0 -0.5 -1.0 -1.5 -2.0

f1 (ppm)

S79

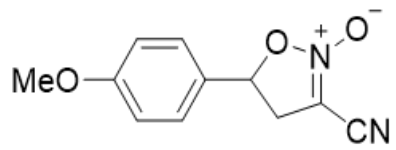

**2h**

(125MHz, CDCl<sub>3</sub>)

—161.16

128.26  
127.55

—114.93  
—110.12

—93.49

—80.94

—55.73

—37.18

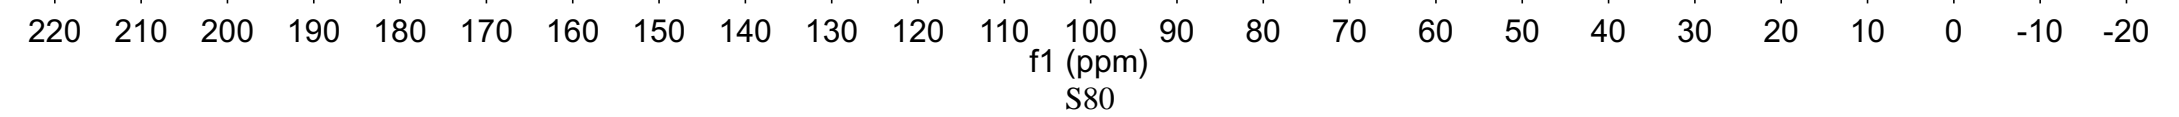



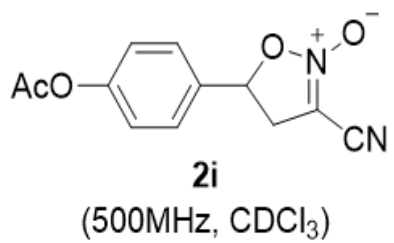

7.43  
7.42  
7.41  
7.40  
7.40  
7.39  
7.20  
7.19  
7.19  
7.18  
7.17  
7.16  
5.90  
5.88  
5.85  
3.72  
3.69  
3.67  
3.65  
3.39  
3.37  
3.35  
3.33  
-2.32

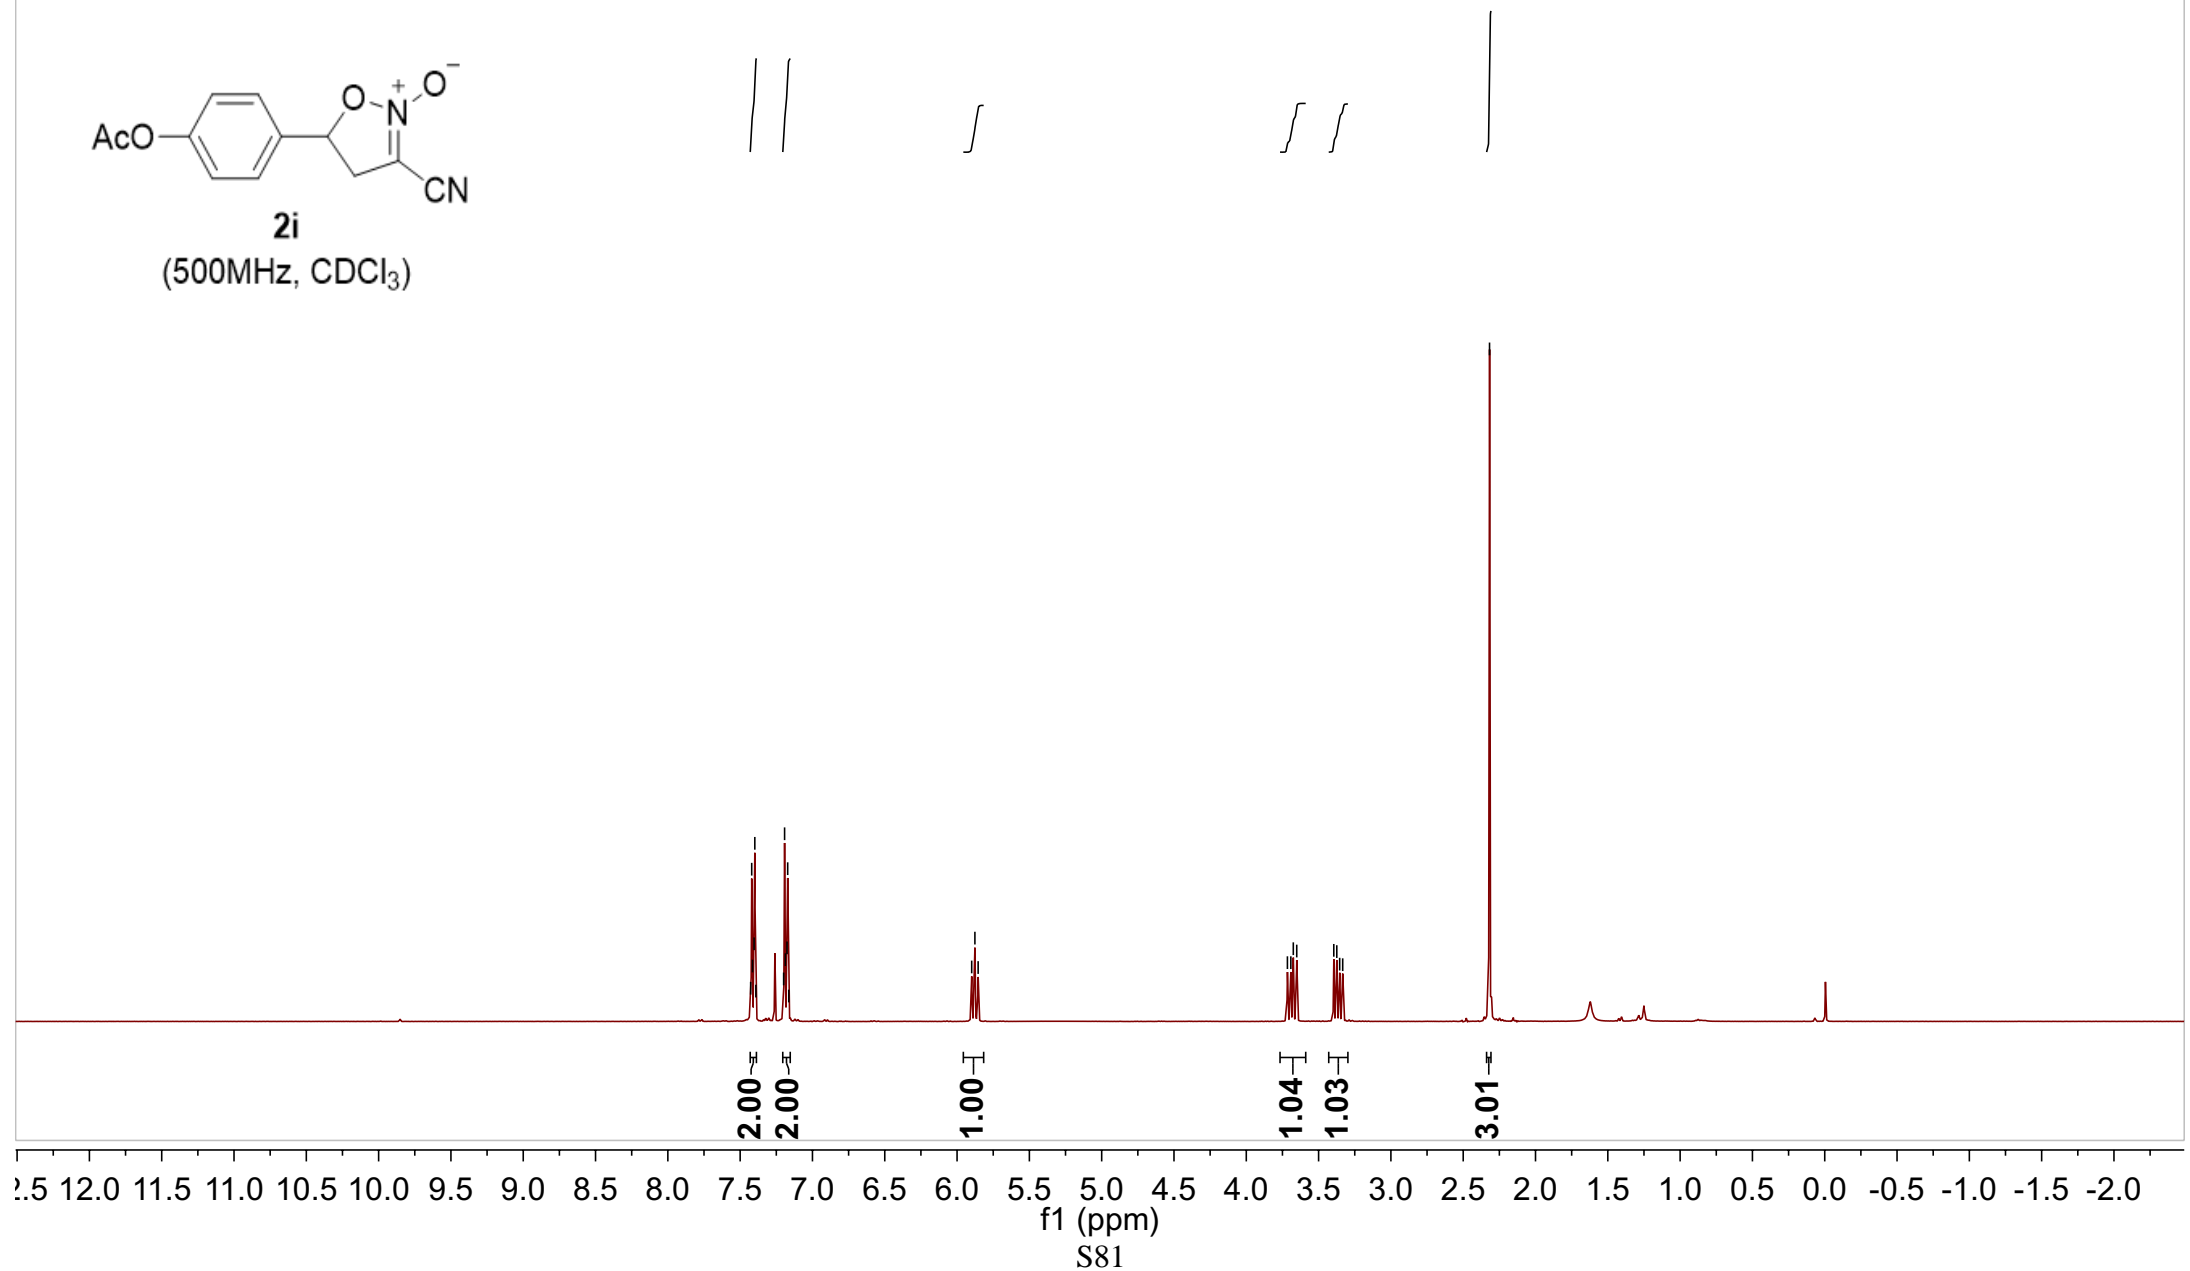

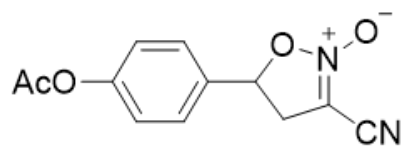

**2i**

(125MHz, CDCl<sub>3</sub>)

—169.38

—151.80

~133.49

~127.39

~122.77

—109.68

—92.83

—79.71

—37.29

—21.21

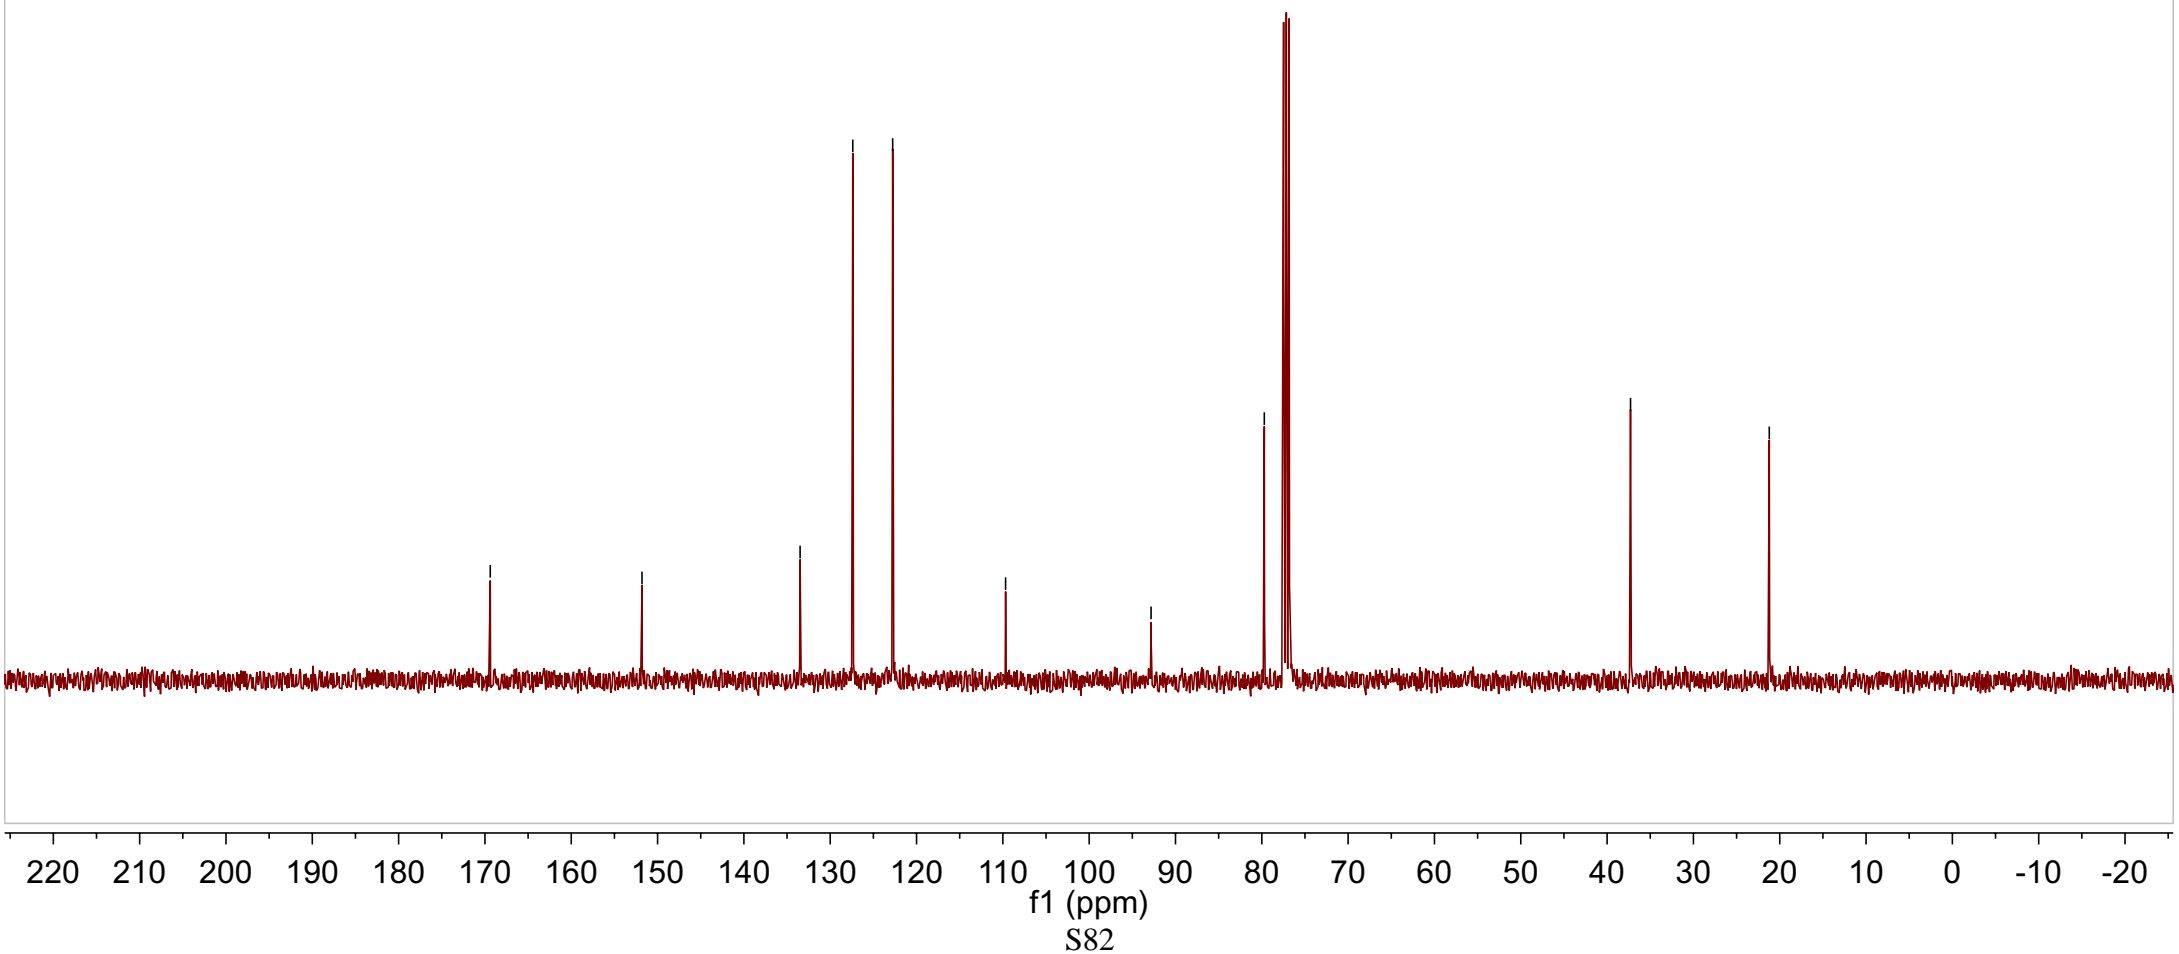

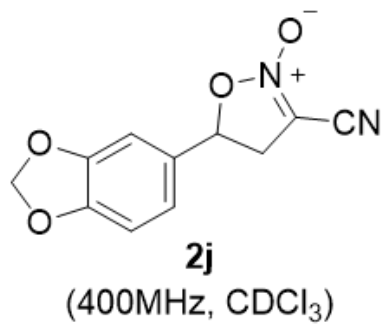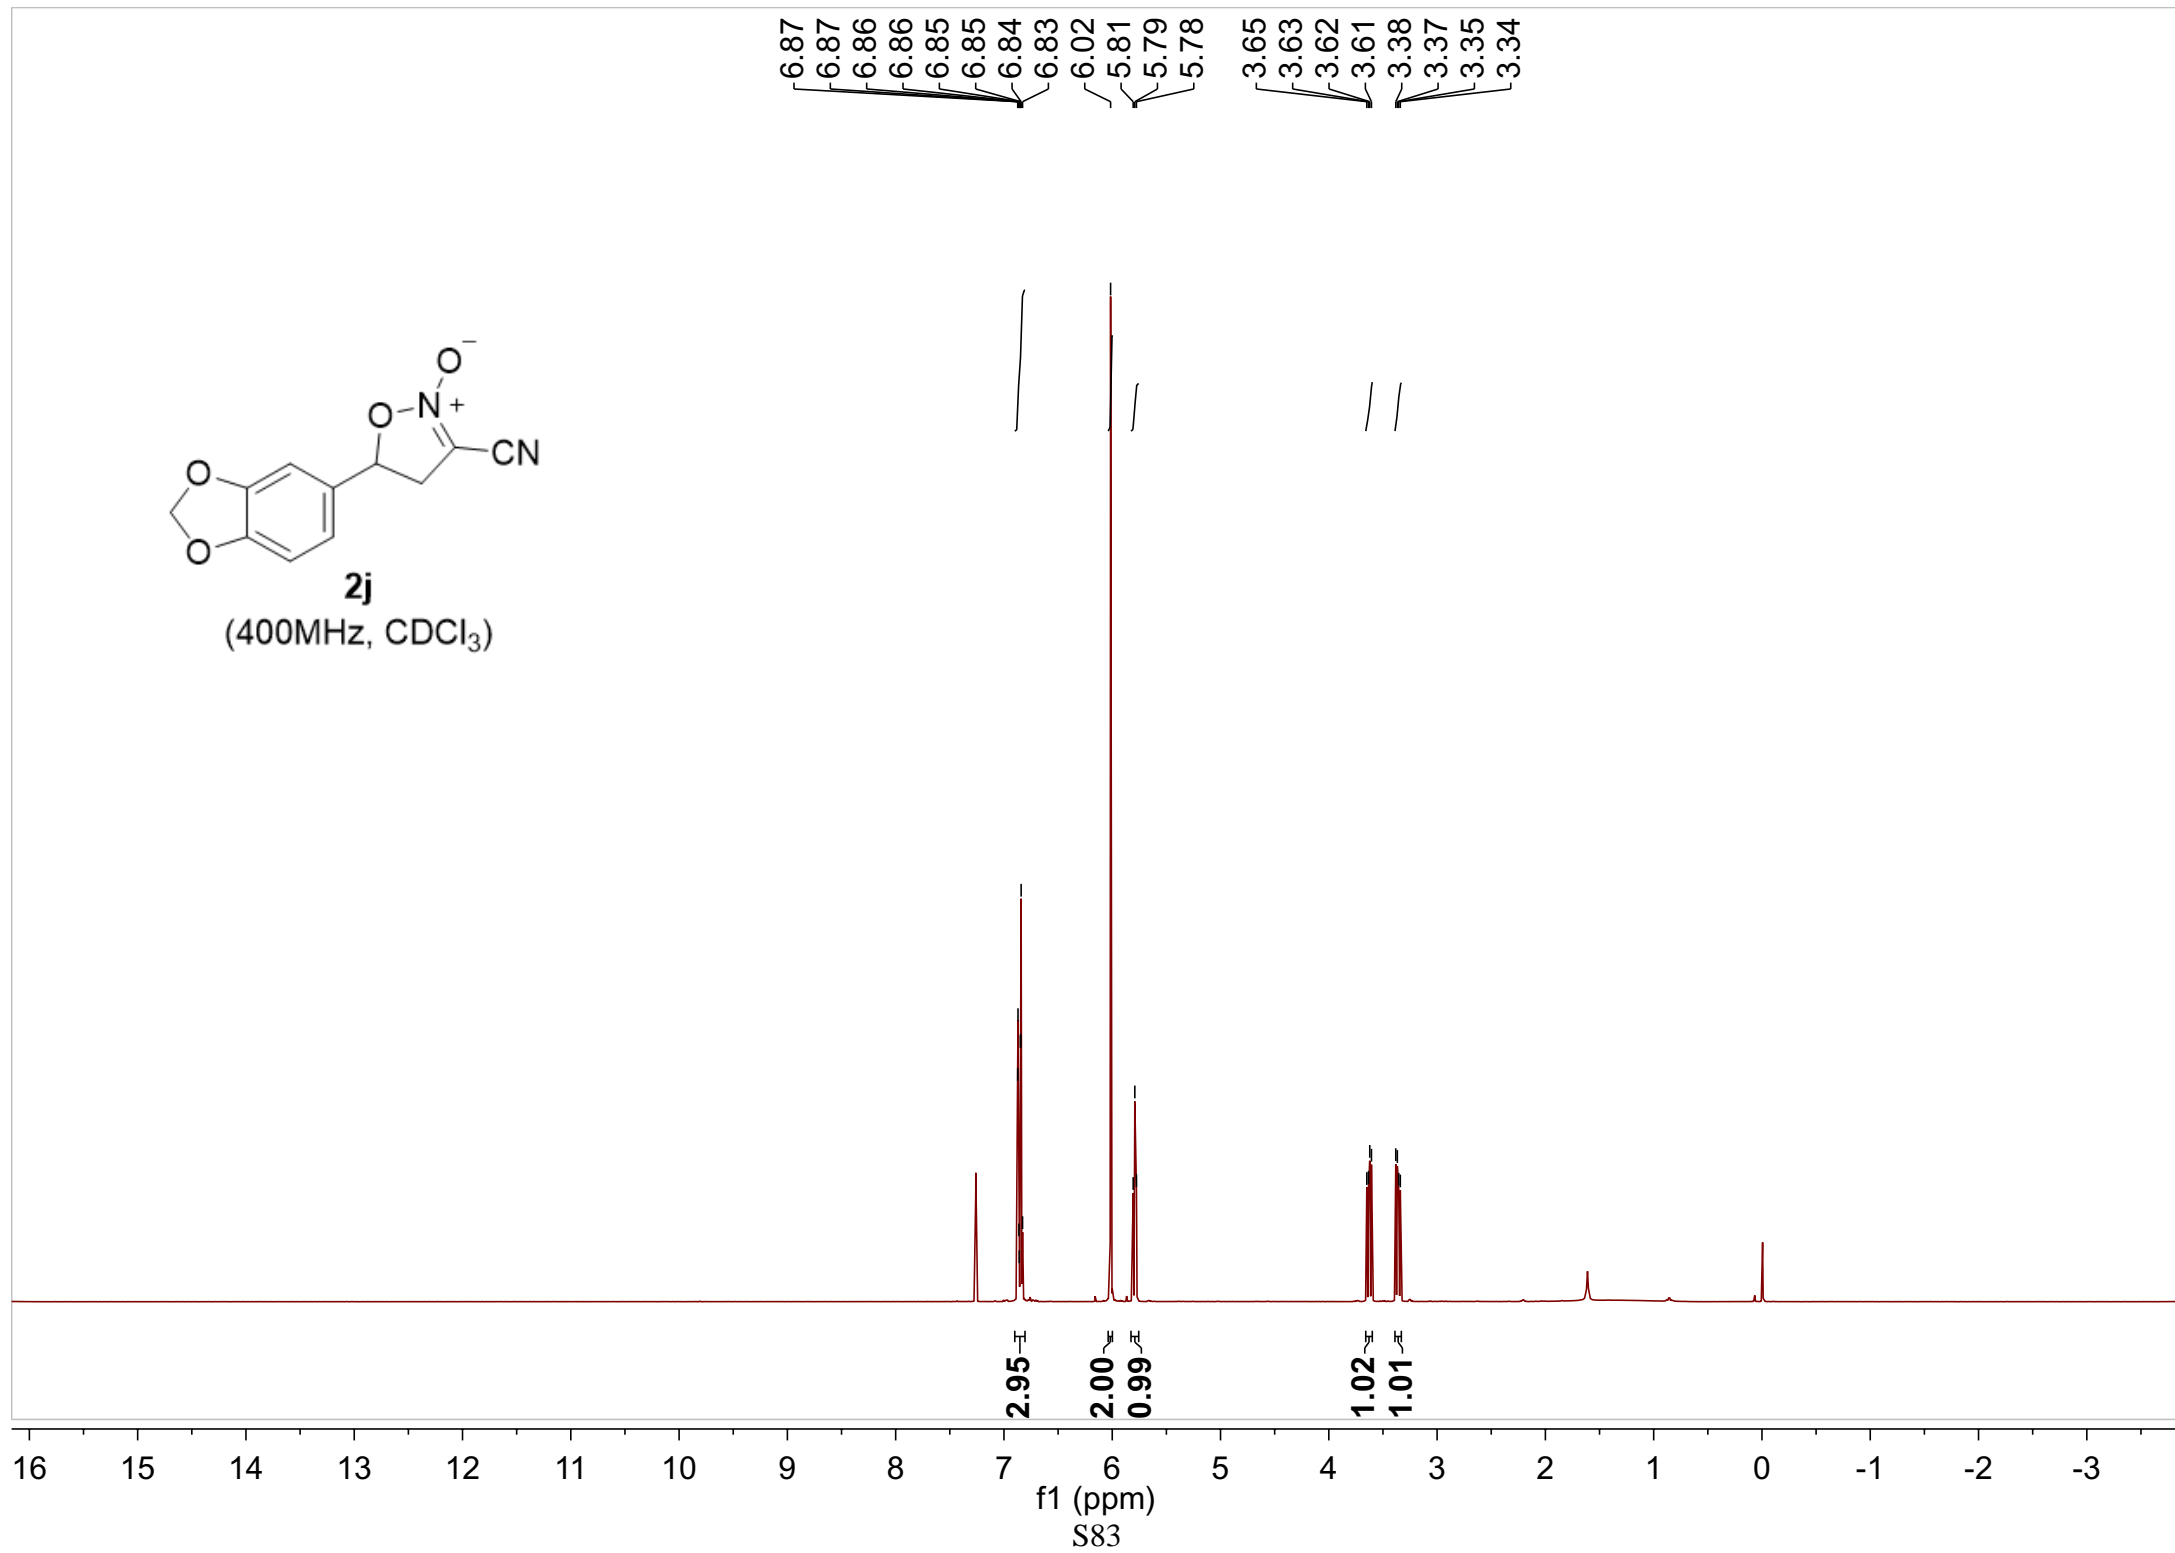

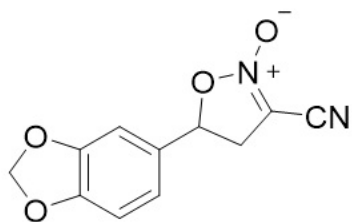

**2j**  
(150MHz, CDCl<sub>3</sub>)

149.35  
148.91

129.46

120.87

109.99

109.02

106.62

102.03

93.26

80.80

37.38

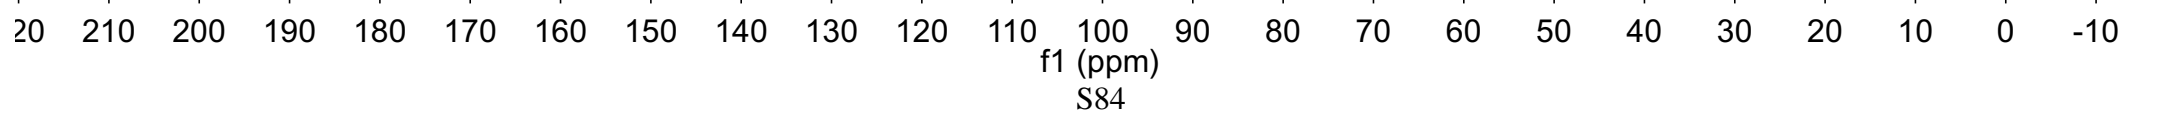

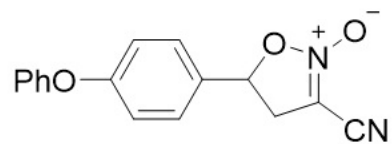

**2k**  
(600MHz, CDCl<sub>3</sub>)

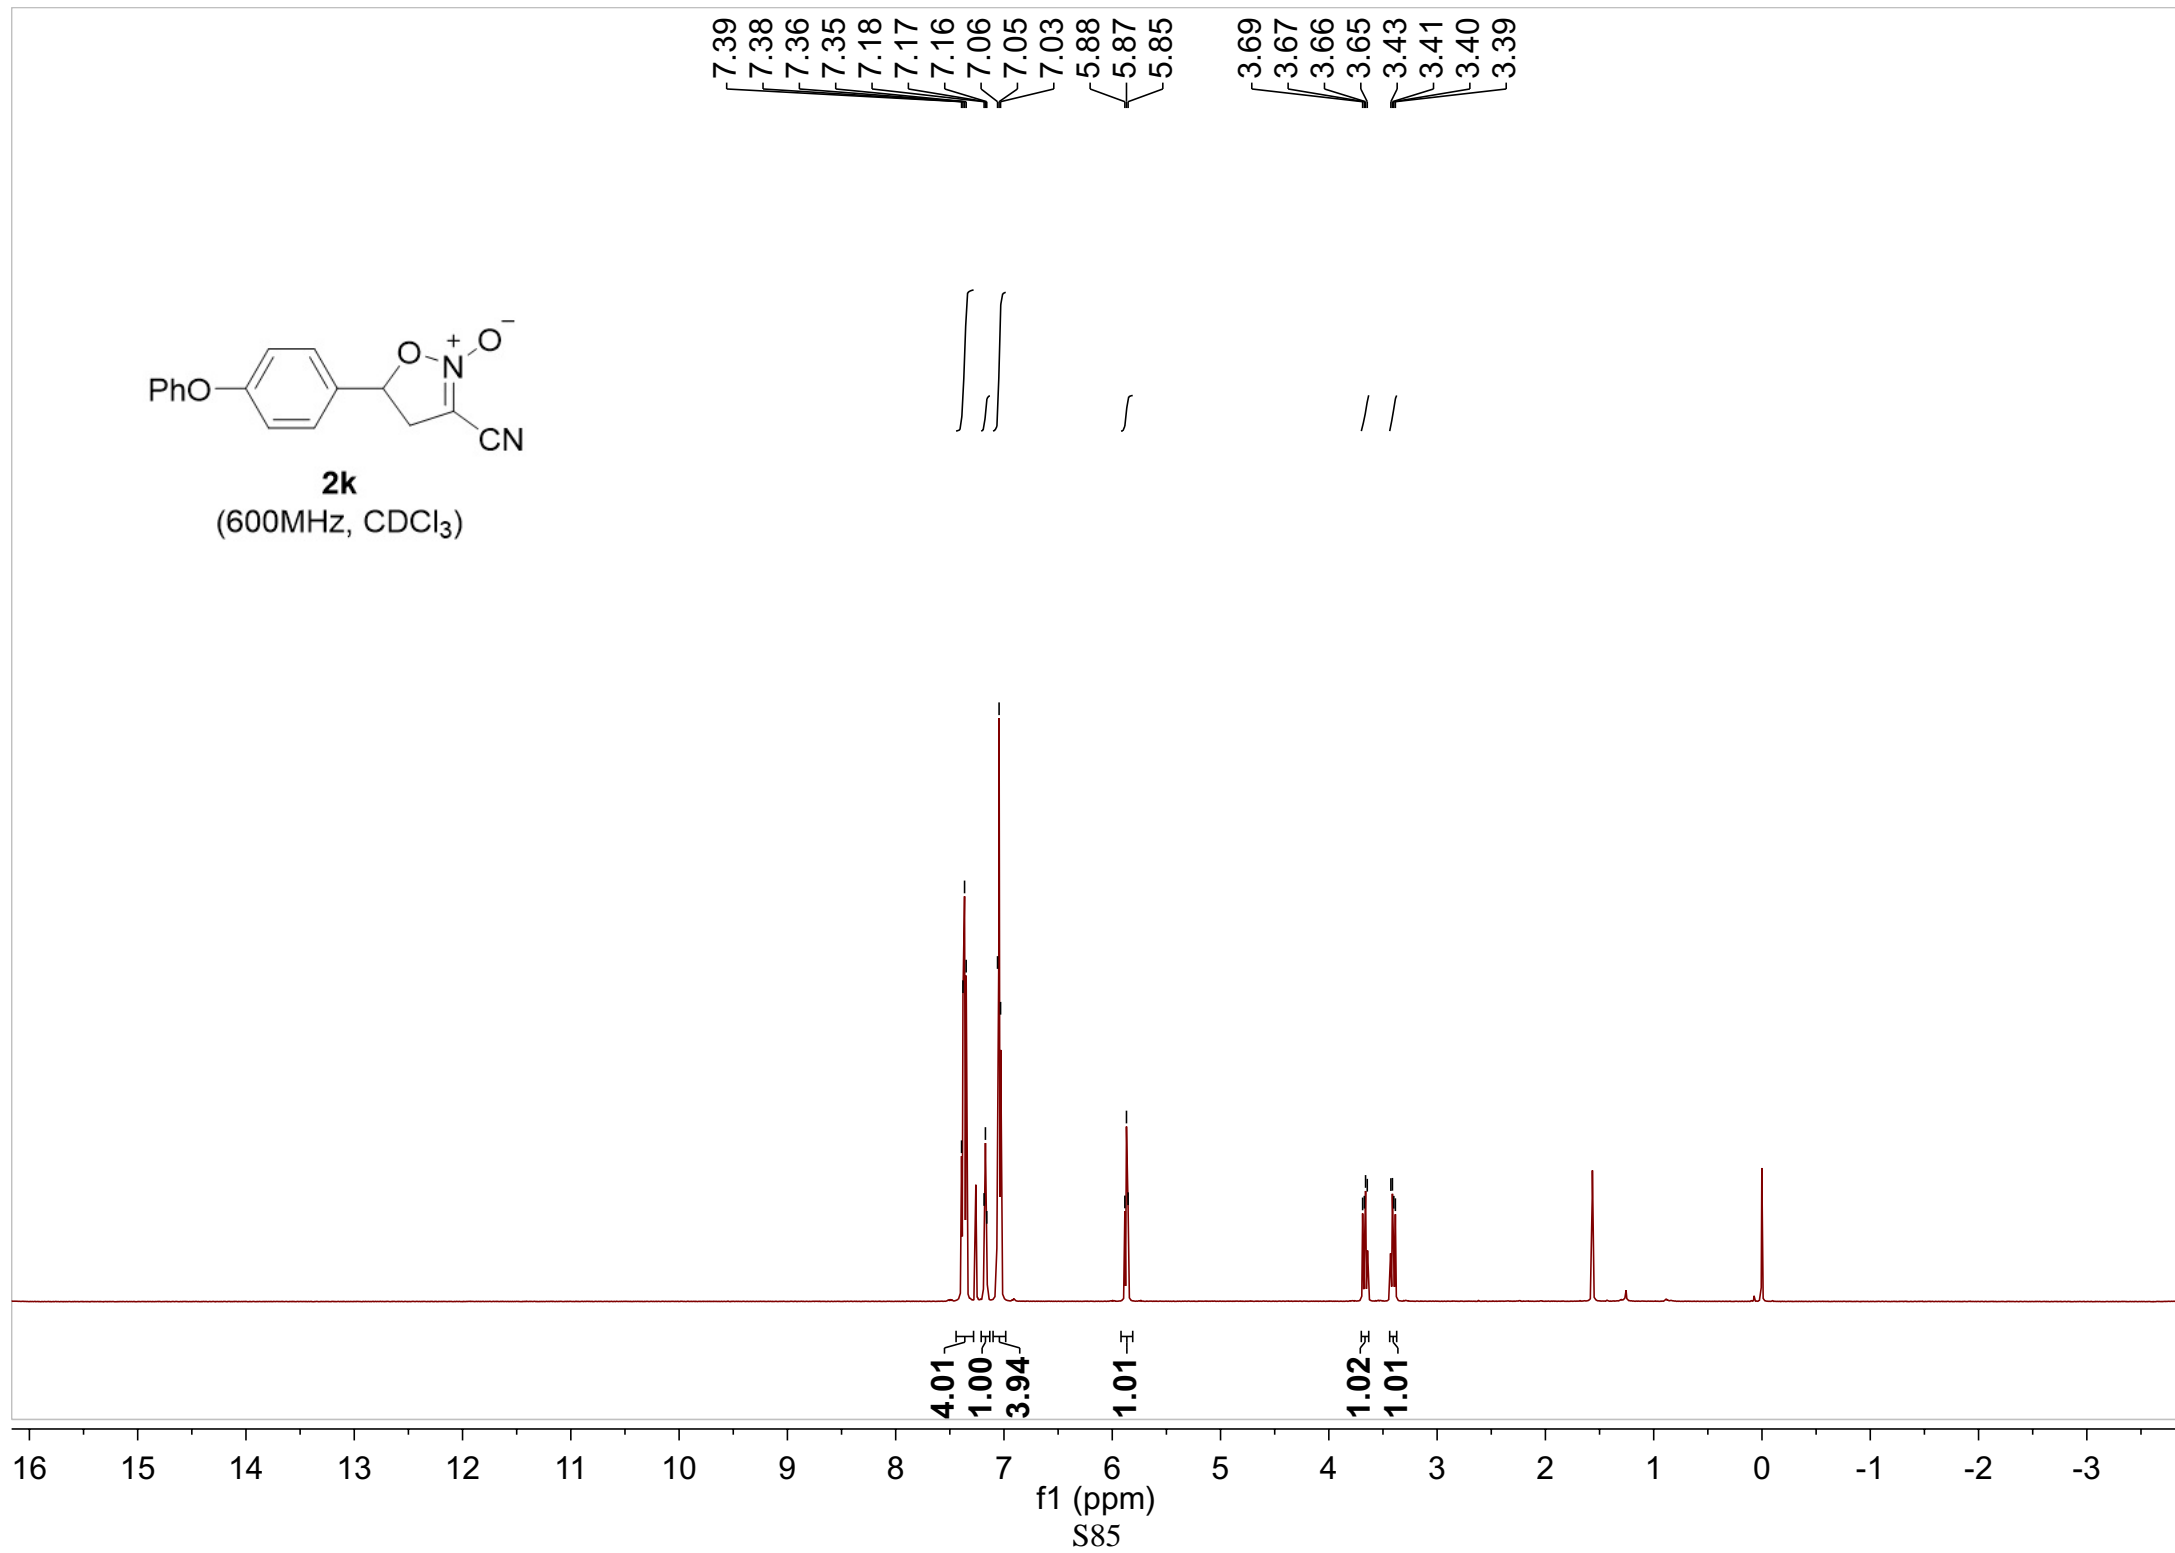

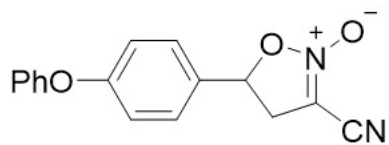

**2k**

(150MHz, CDCl<sub>3</sub>)

~159.20  
~156.27

130.13  
129.91  
128.03  
124.31  
119.71  
119.02  
109.79

—92.95

—80.24

—37.20

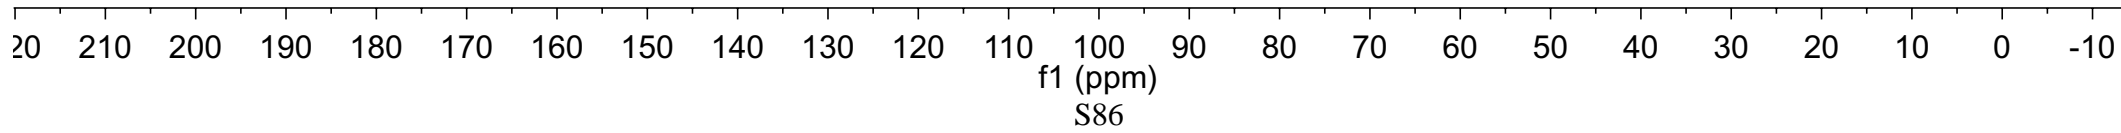

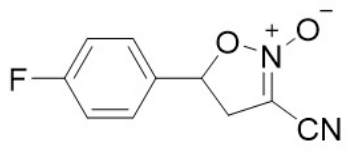

**21**

(400MHz, CDCl<sub>3</sub>)

7.42  
7.41  
7.41  
7.40  
7.39  
7.39  
7.38  
7.38  
7.37  
7.18  
7.17  
7.16  
7.16  
7.15  
7.15  
7.14  
7.14  
7.13  
7.13  
7.12  
5.90  
5.88  
5.86  
3.73  
3.70  
3.69  
3.66  
3.40  
3.38  
3.36  
3.34

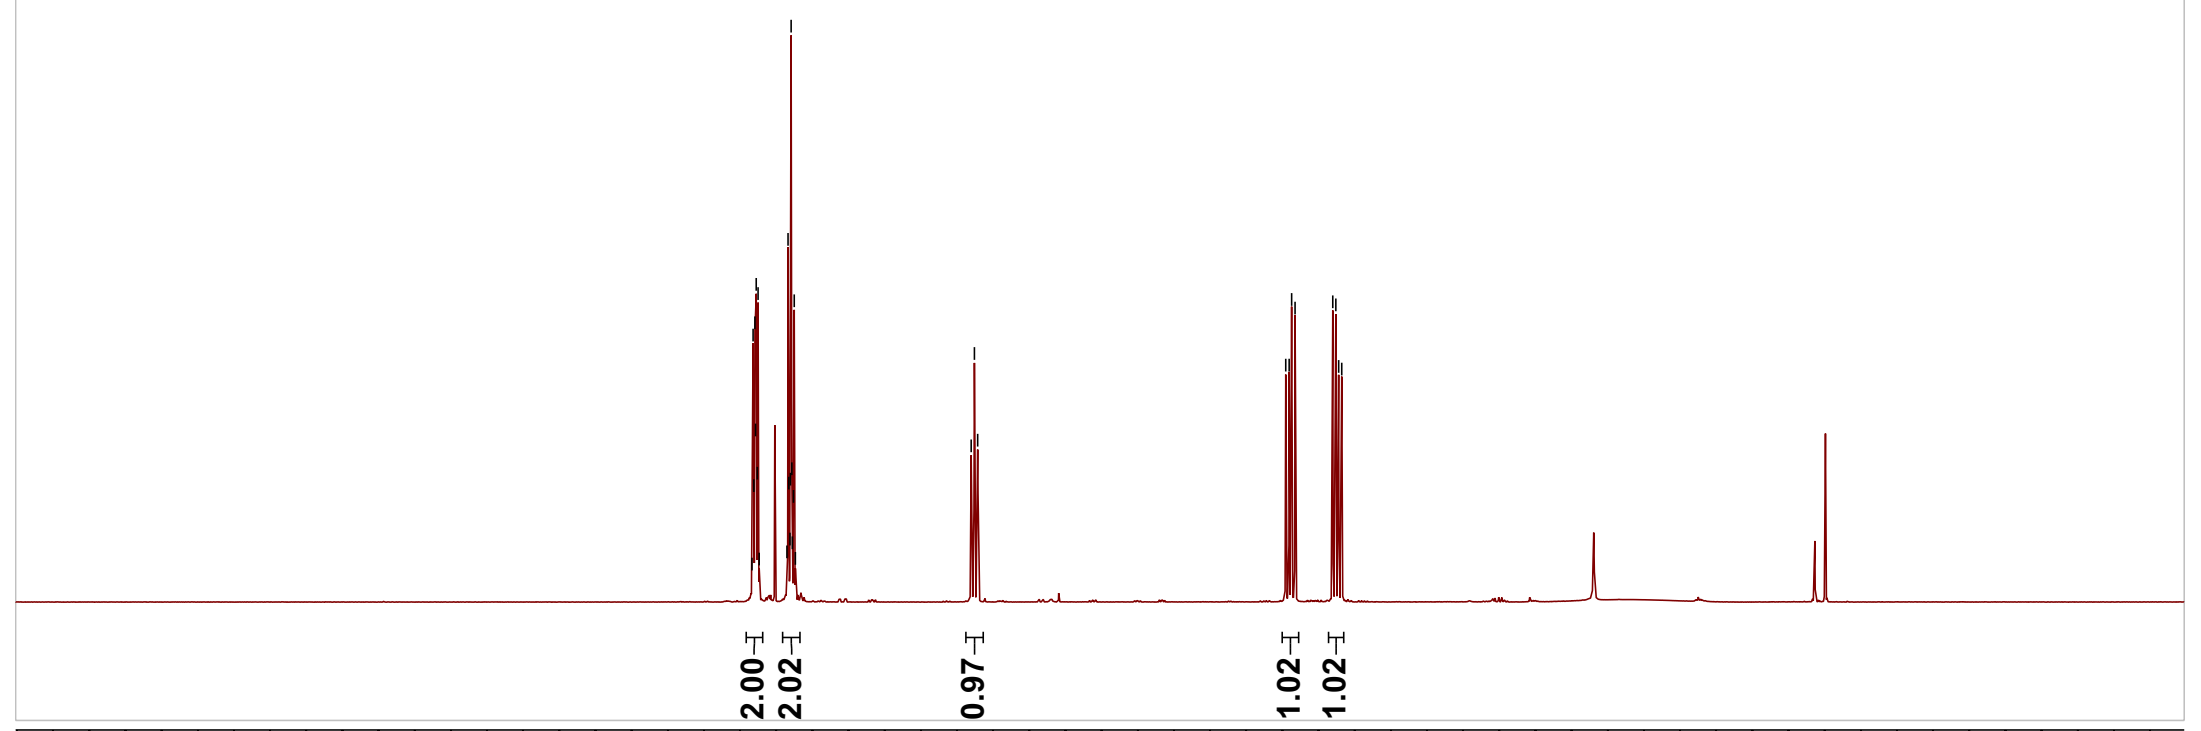

2.00  
2.02

0.97

1.02  
1.02

f1 (ppm)  
S87

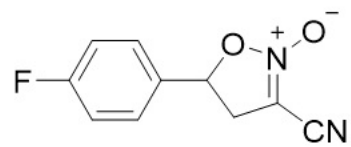

**2I**  
(471MHz, CDCl<sub>3</sub>)

-110.49  
-110.50  
-110.51  
-110.51  
-110.52  
-110.53  
-110.53  
-110.54  
-110.55

-110.49  
-110.50  
-110.51  
-110.51  
-110.52  
-110.53  
-110.53  
-110.54  
-110.55

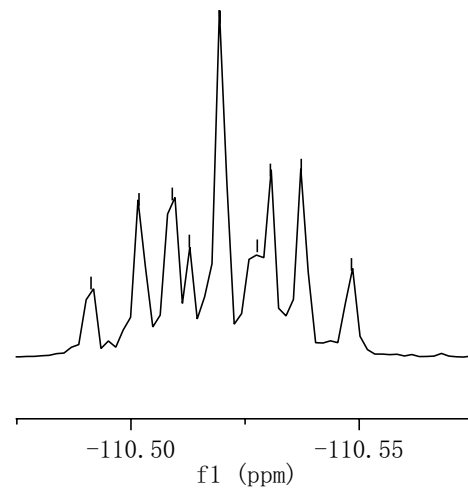

0 -10 -20 -30 -40 -50 -60 -70 -80 -90 -100 -110 -120 -130 -140 -150 -160 -170 -180 -190 -200

f1 (ppm)  
S88



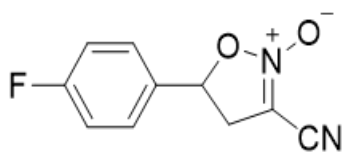

2I

(125MHz, CDCl<sub>3</sub>)

~164.59  
~162.60

131.78  
131.76  
128.26  
128.19

116.67  
116.49  
~109.69

-92.86

-79.74

-37.32

210 200 190 180 170 160 150 140 130 120 110 100 90 80 70 60 50 40 30 20 10 0 -10

f1 (ppm)

S89

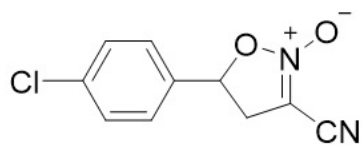

**2m**  
(600MHz, CDCl<sub>3</sub>)

7.44  
7.43  
7.34  
7.33  
5.89  
5.87  
5.86  
3.73  
3.71  
3.70  
3.69  
3.37  
3.35  
3.34  
3.33

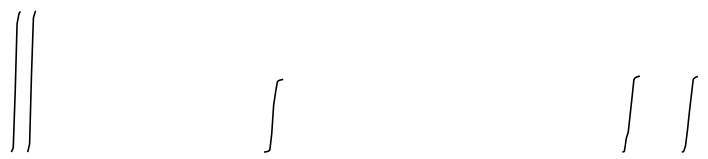

1.85  
1.86  
0.96  
1.00  
0.99

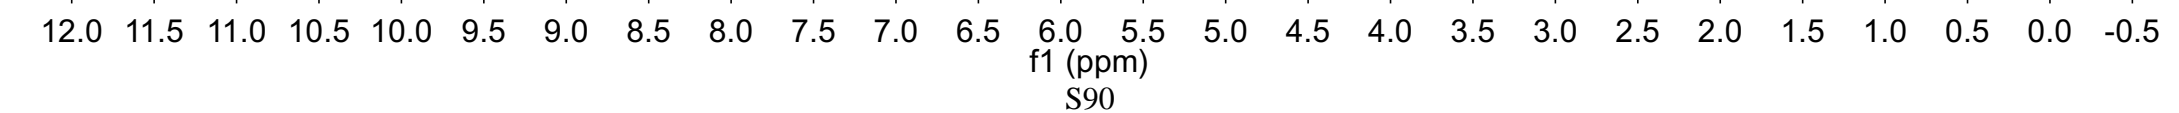

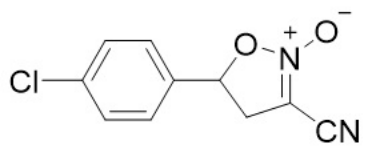

**2m**  
(150MHz, CDCl<sub>3</sub>)

~136.31  
~134.72  
~129.94  
~127.63

—109.80

—92.86

—79.65

—37.51

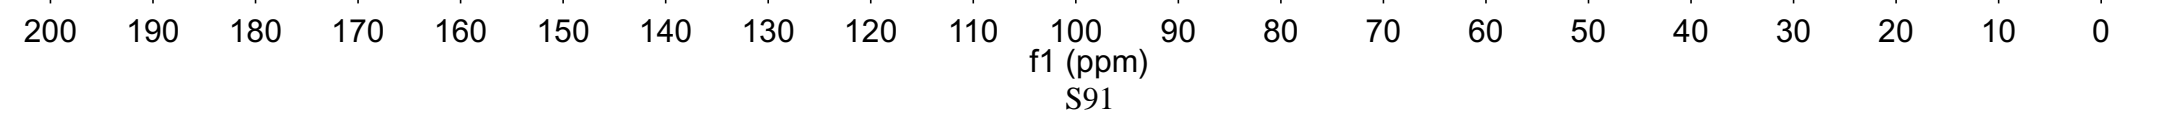

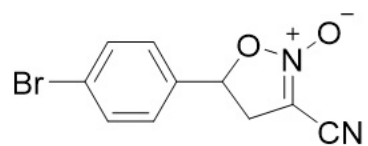

**2n**  
(400MHz, CDCl<sub>3</sub>)

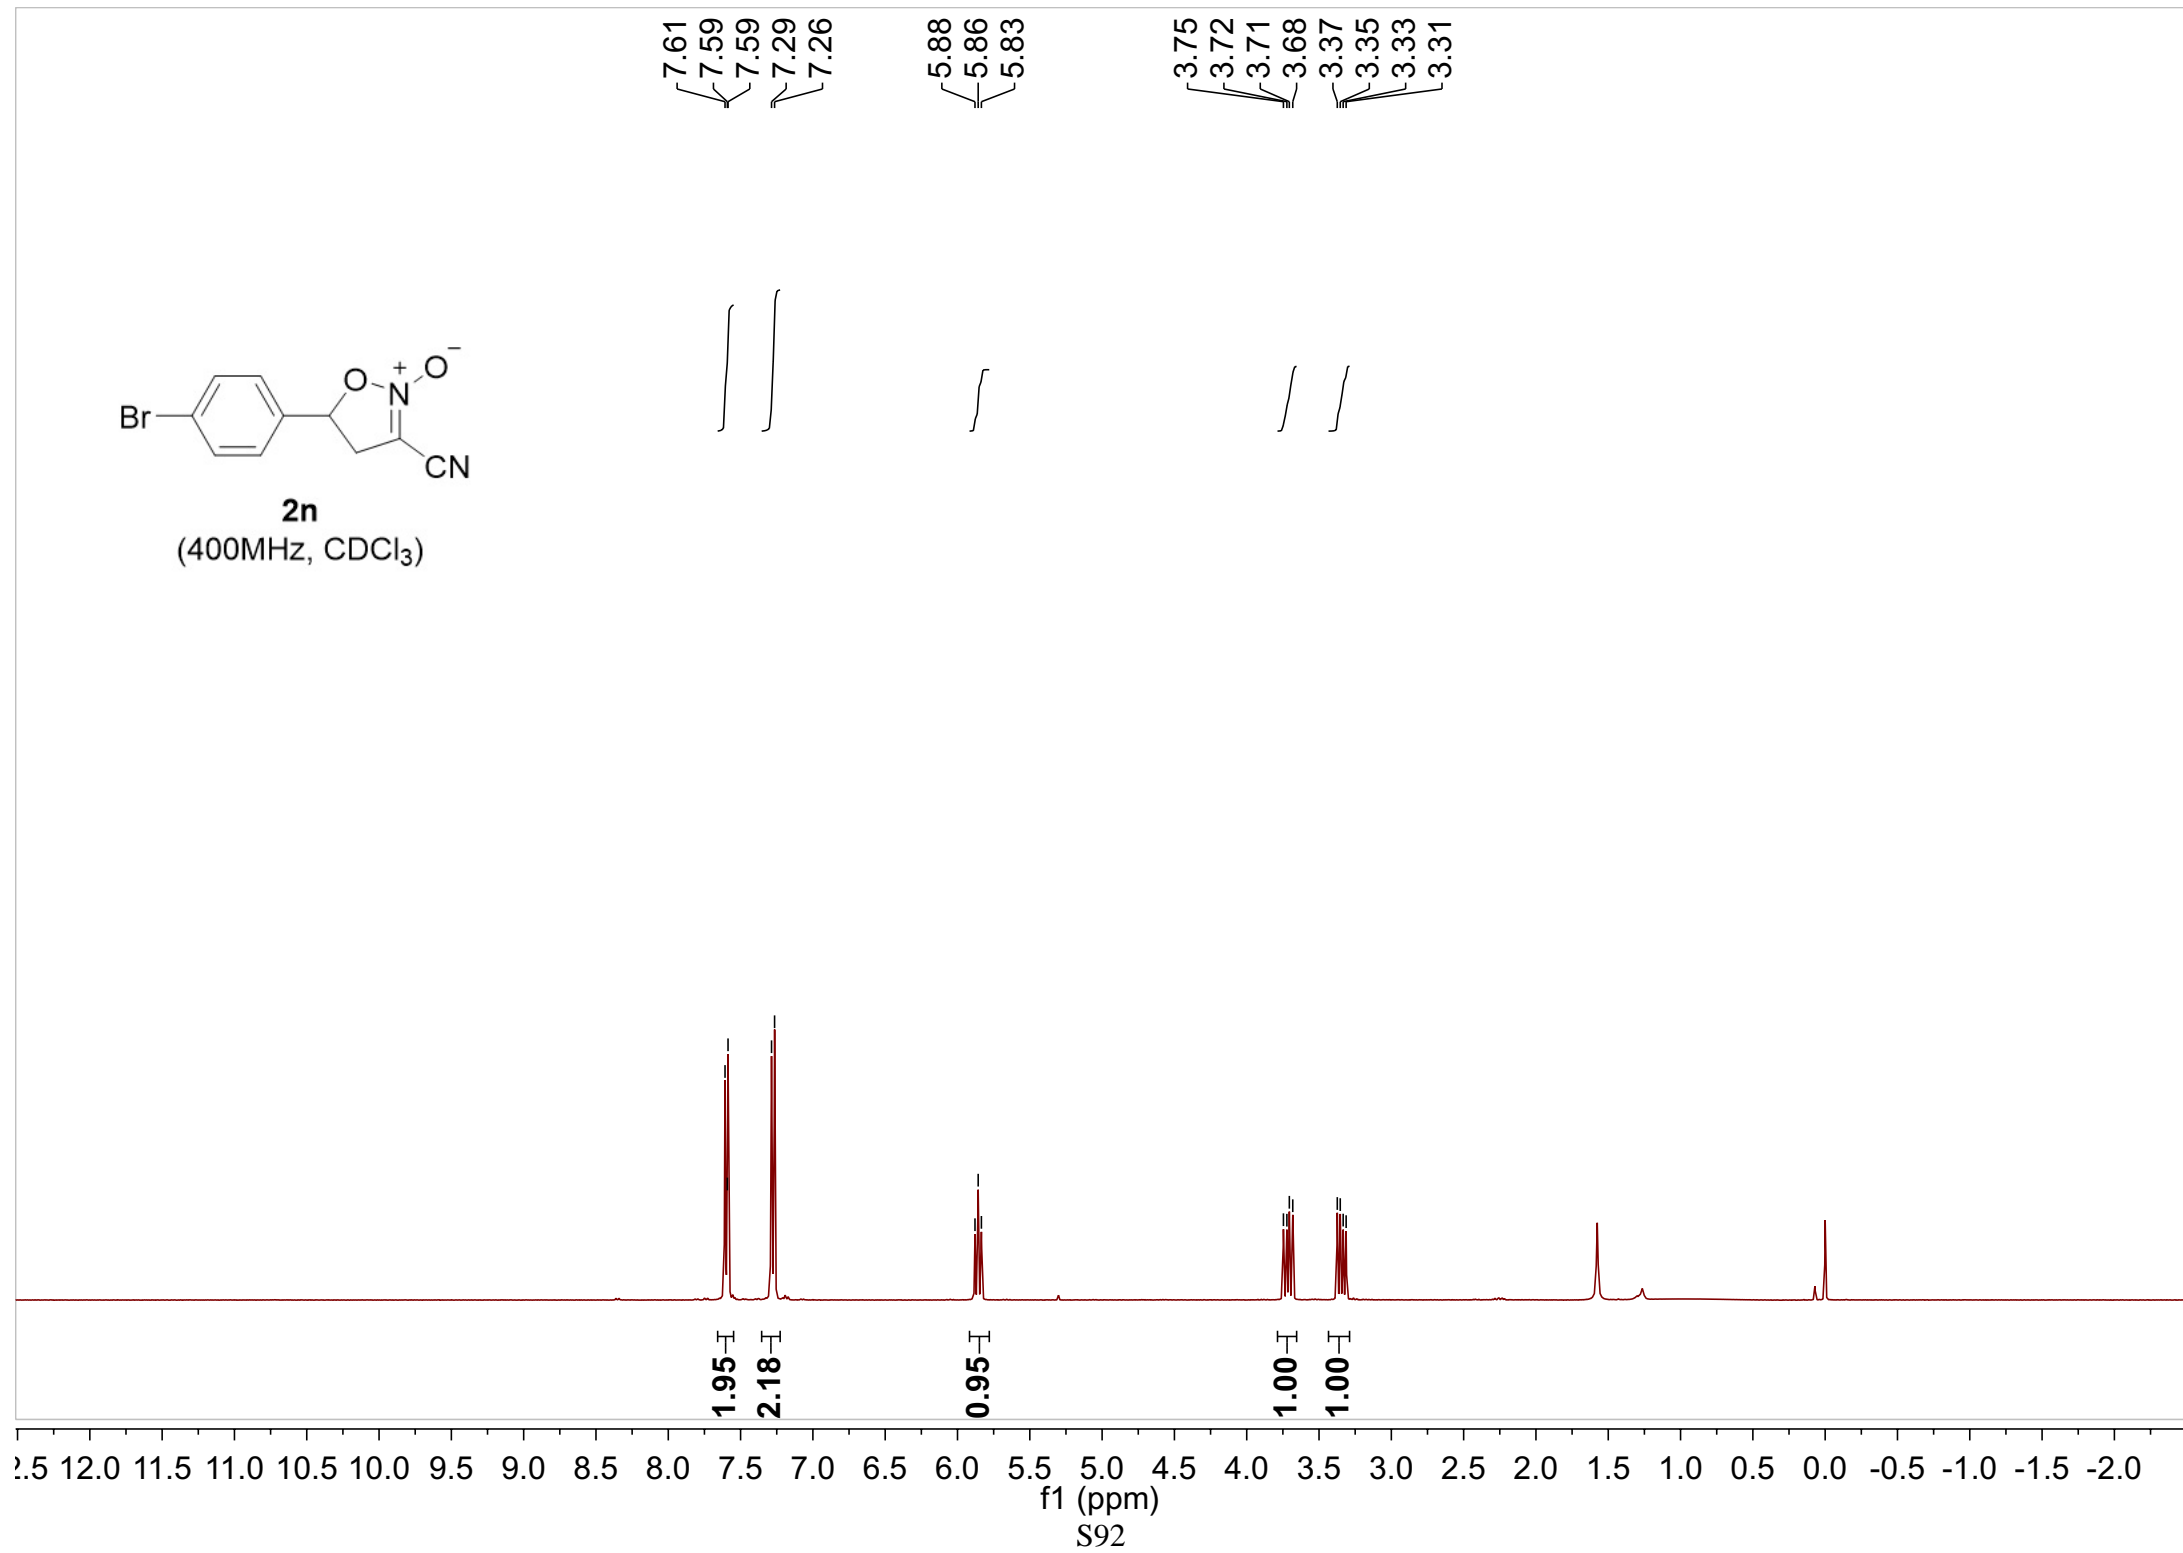

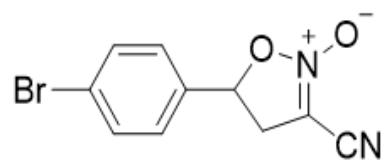

**2n**

(125MHz, CDCl<sub>3</sub>)

—135.24  
—132.86  
—127.86  
—124.40  
  
—109.80  
  
—92.91  
  
—79.68  
  
—37.43

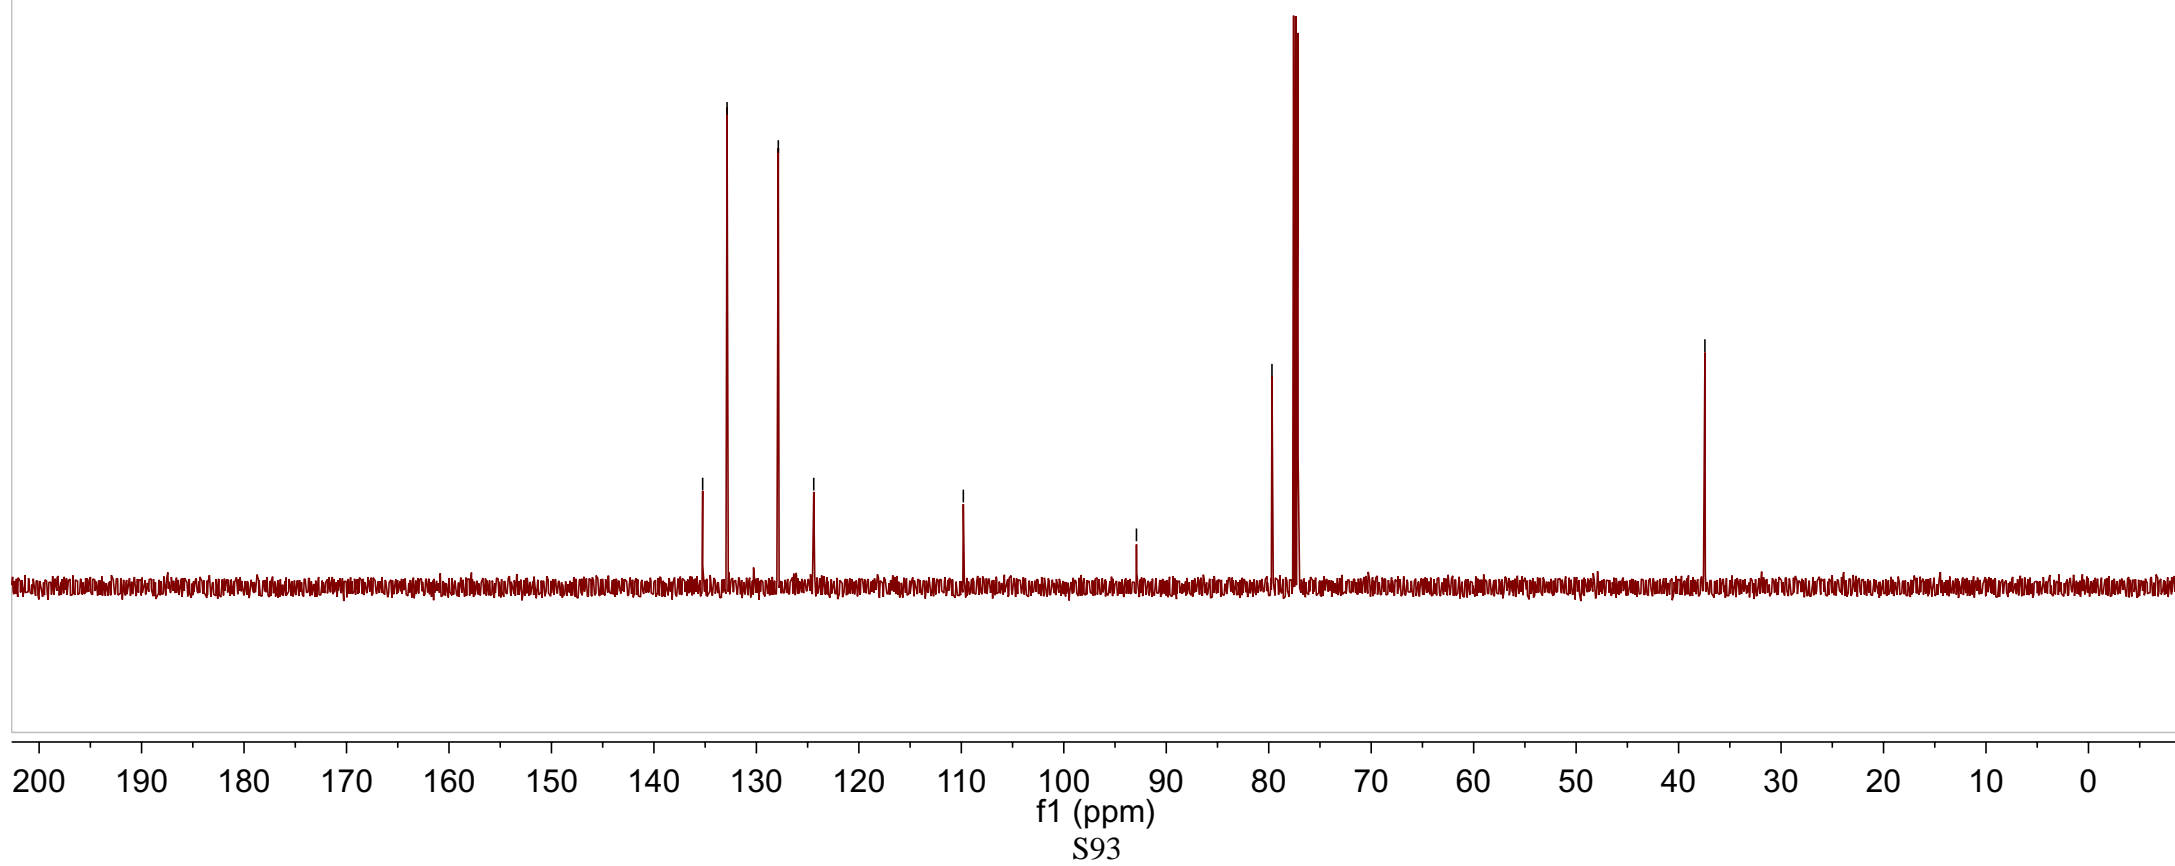

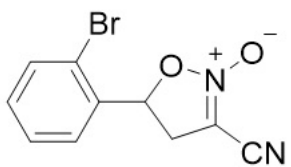

**2o**

(400MHz, CDCl<sub>3</sub>)

7.64  
7.62  
7.52  
7.52  
7.50  
7.50  
7.45  
7.43  
7.42  
7.32  
7.31  
7.30  
7.29  
7.28  
7.28  
6.17  
6.15  
6.14  
6.13

3.98  
3.96  
3.94  
3.91  
3.24  
3.23  
3.20  
3.19

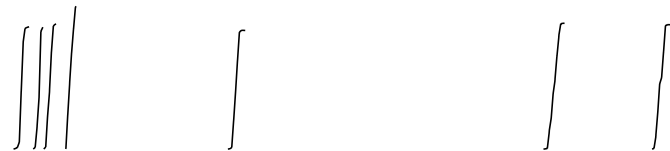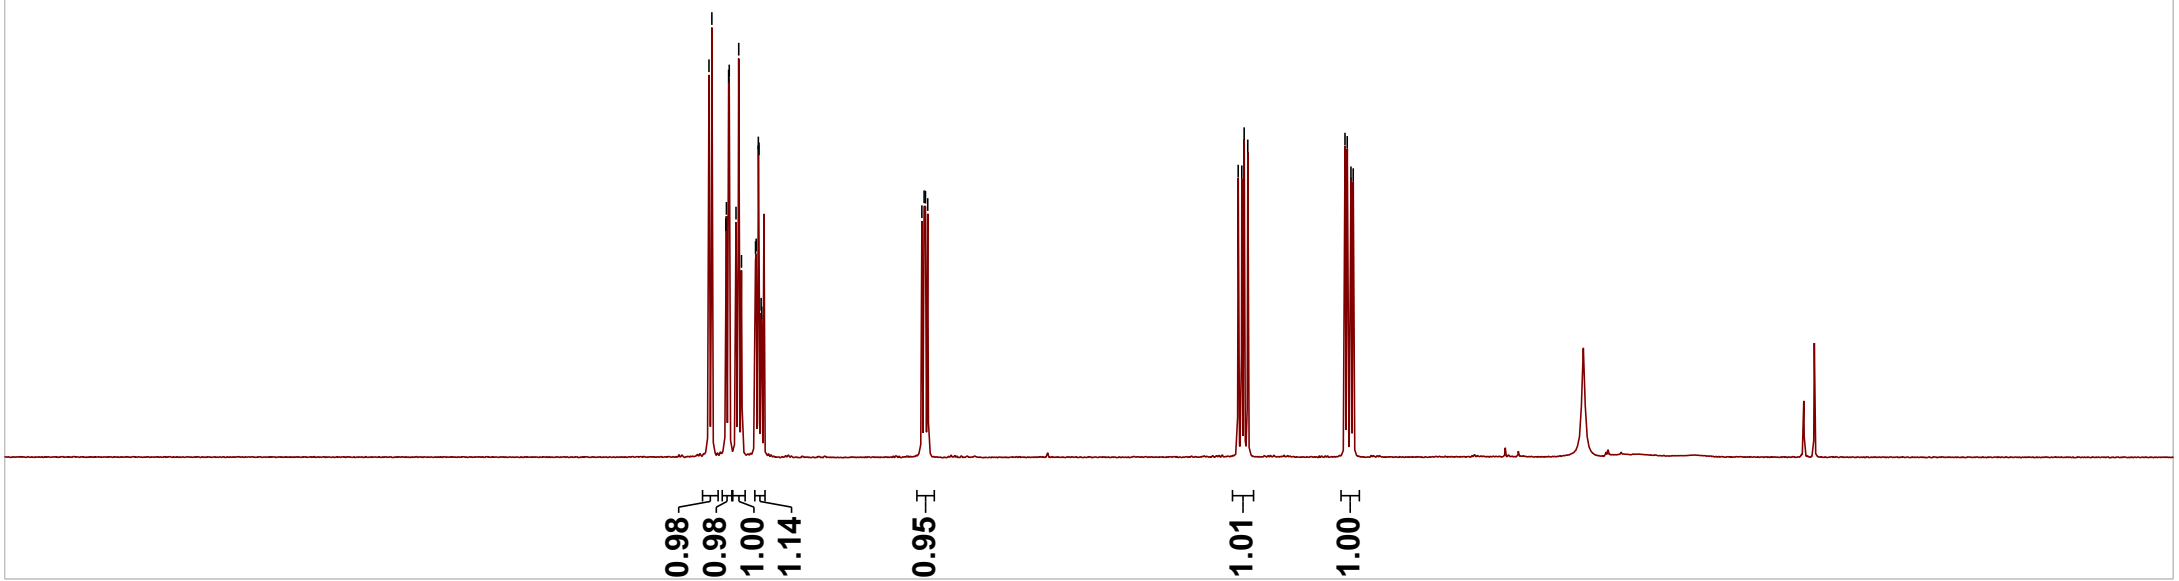

0.98  
0.98  
1.00  
1.14  
0.95  
1.01  
1.00

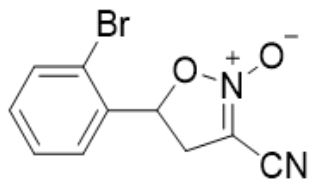

**2o**

(125MHz, CDCl<sub>3</sub>)

136.33  
133.63  
130.92  
128.40  
126.21  
120.49  
— 109.51  
— 92.42  
— 78.48  
— 36.96

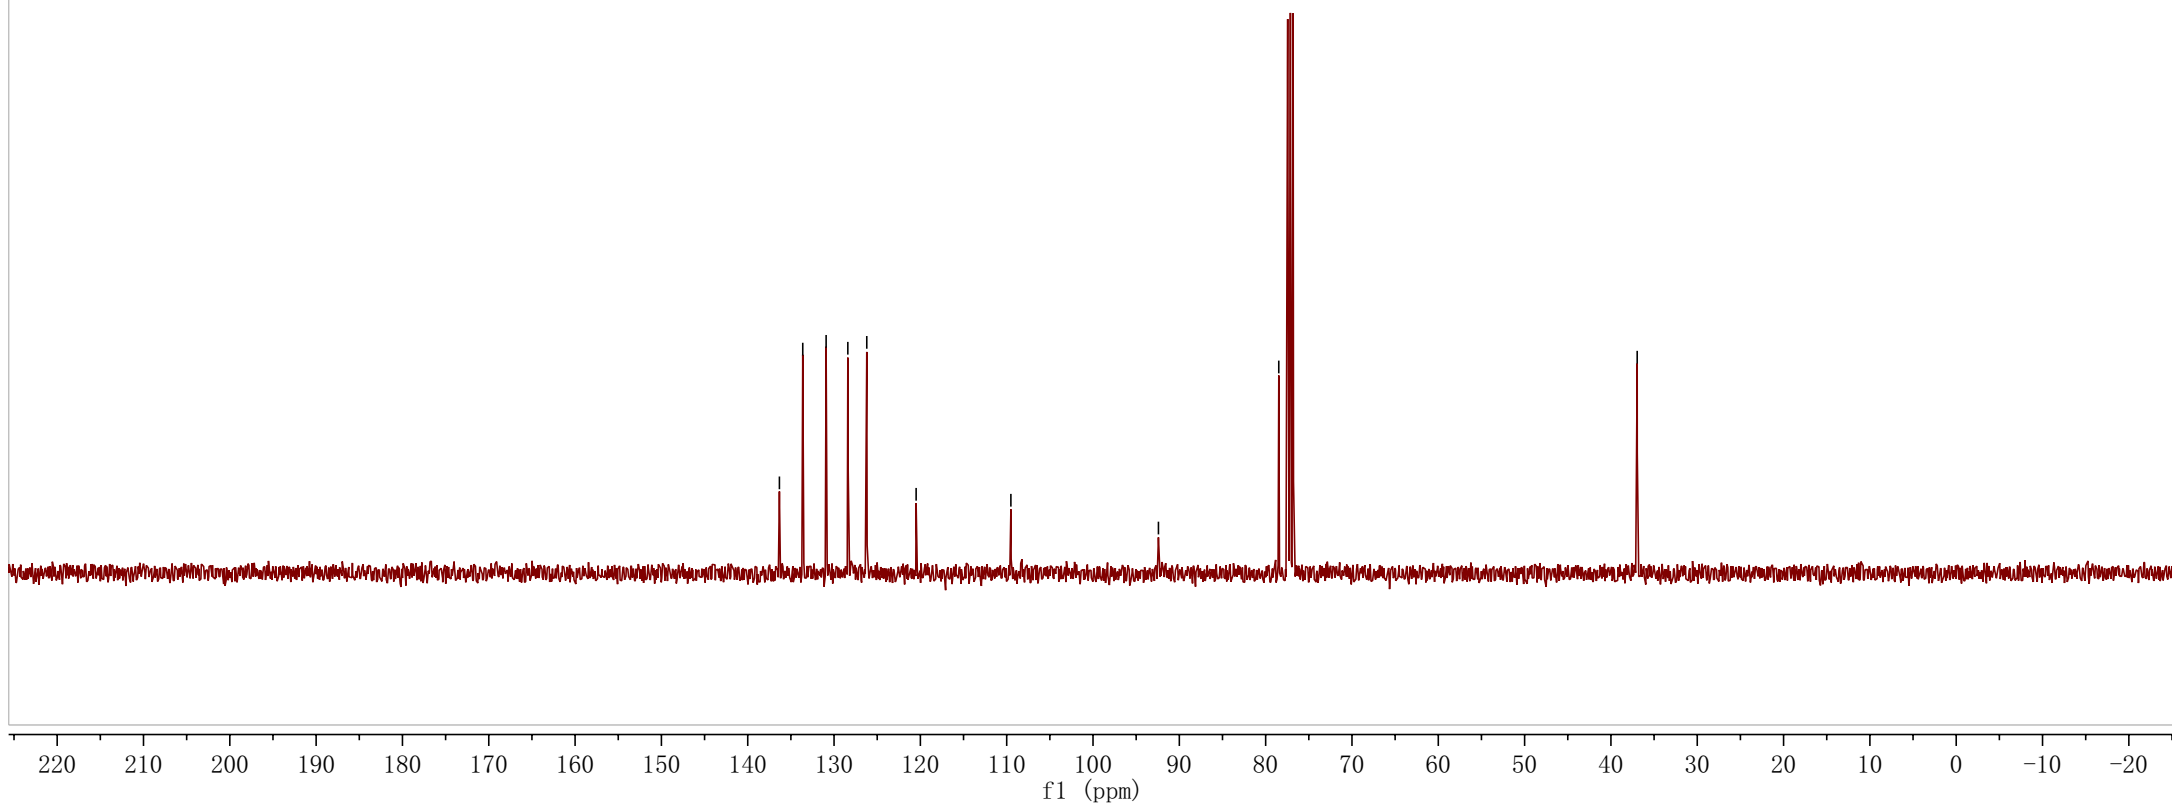

S95

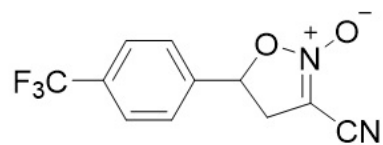

**2p**  
(400MHz,  $CDCl_3$ )

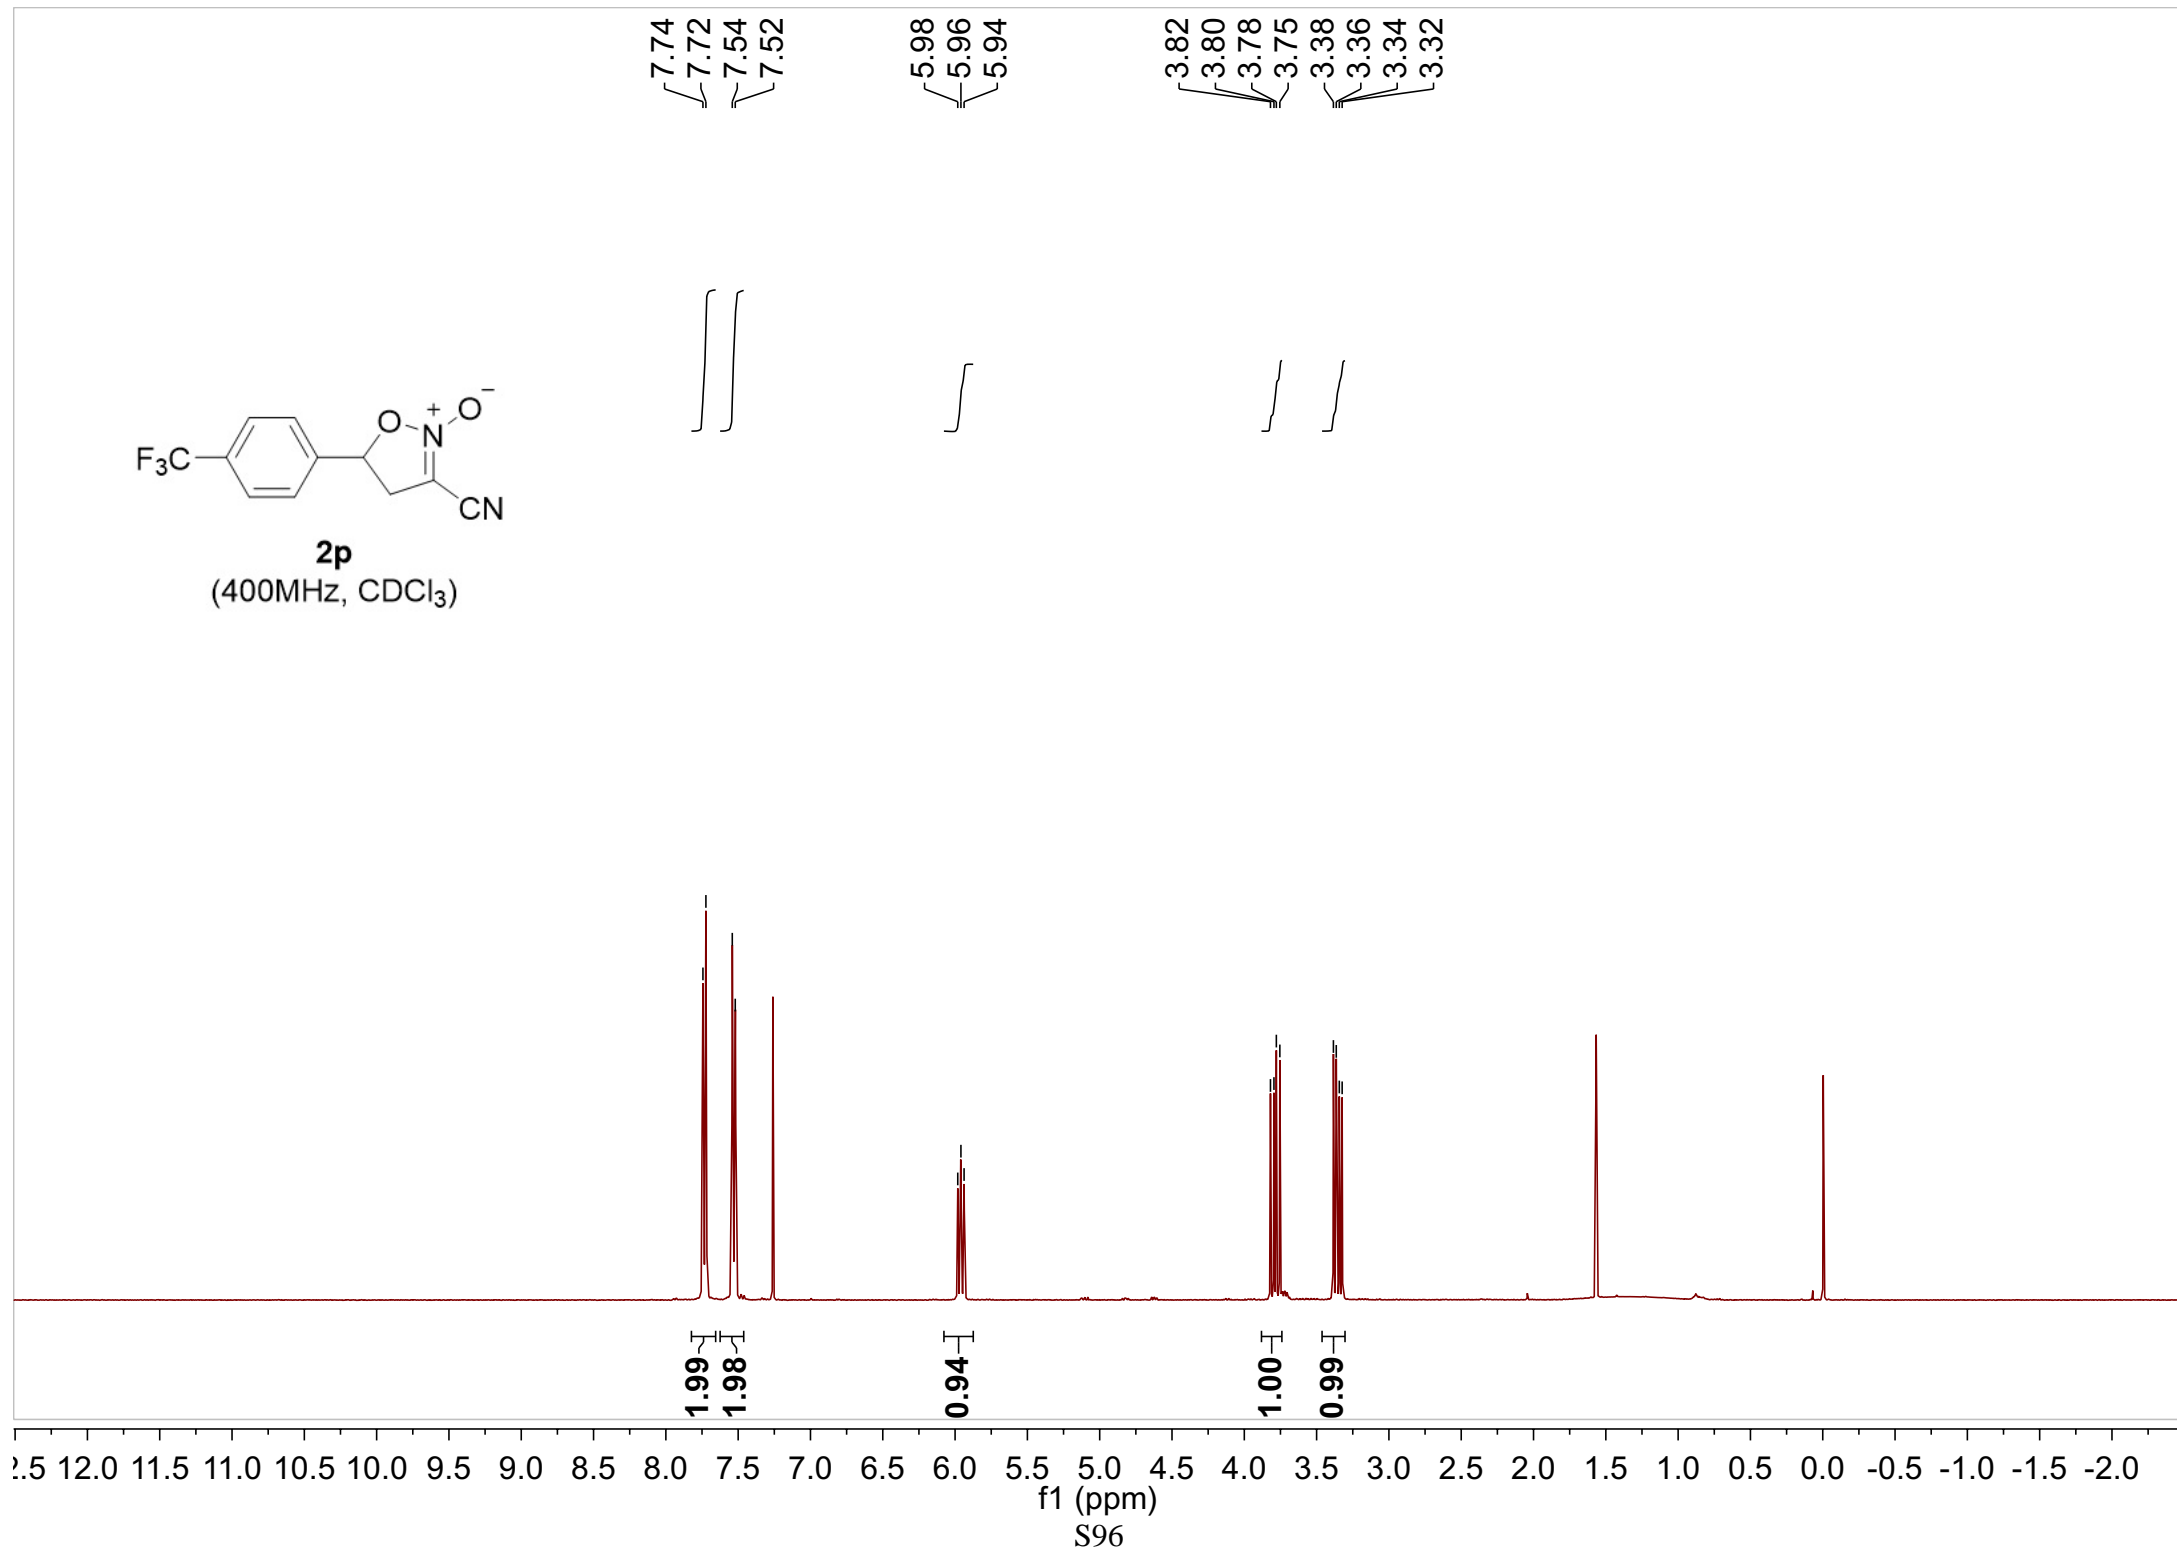



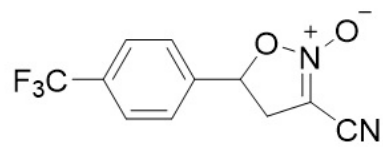

**2p**  
(376MHz, CDCl<sub>3</sub>)

---62.77

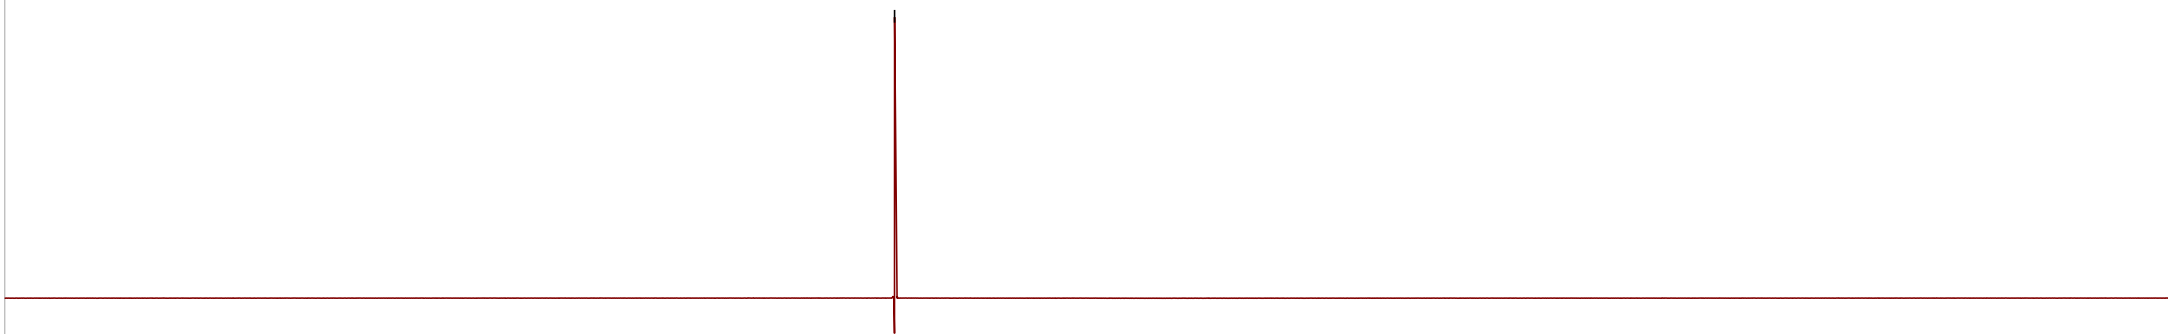

100 80 60 40 20 0 -20 -40 -60 -80 -100 -120 -140 -160 -180 -200 -220 -240 -260 -280 -300  
f1 (ppm)  
S97

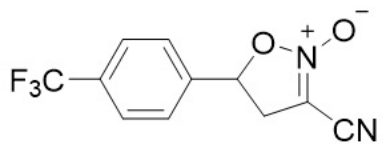

**2p**  
(100MHz, CDCl<sub>3</sub>)

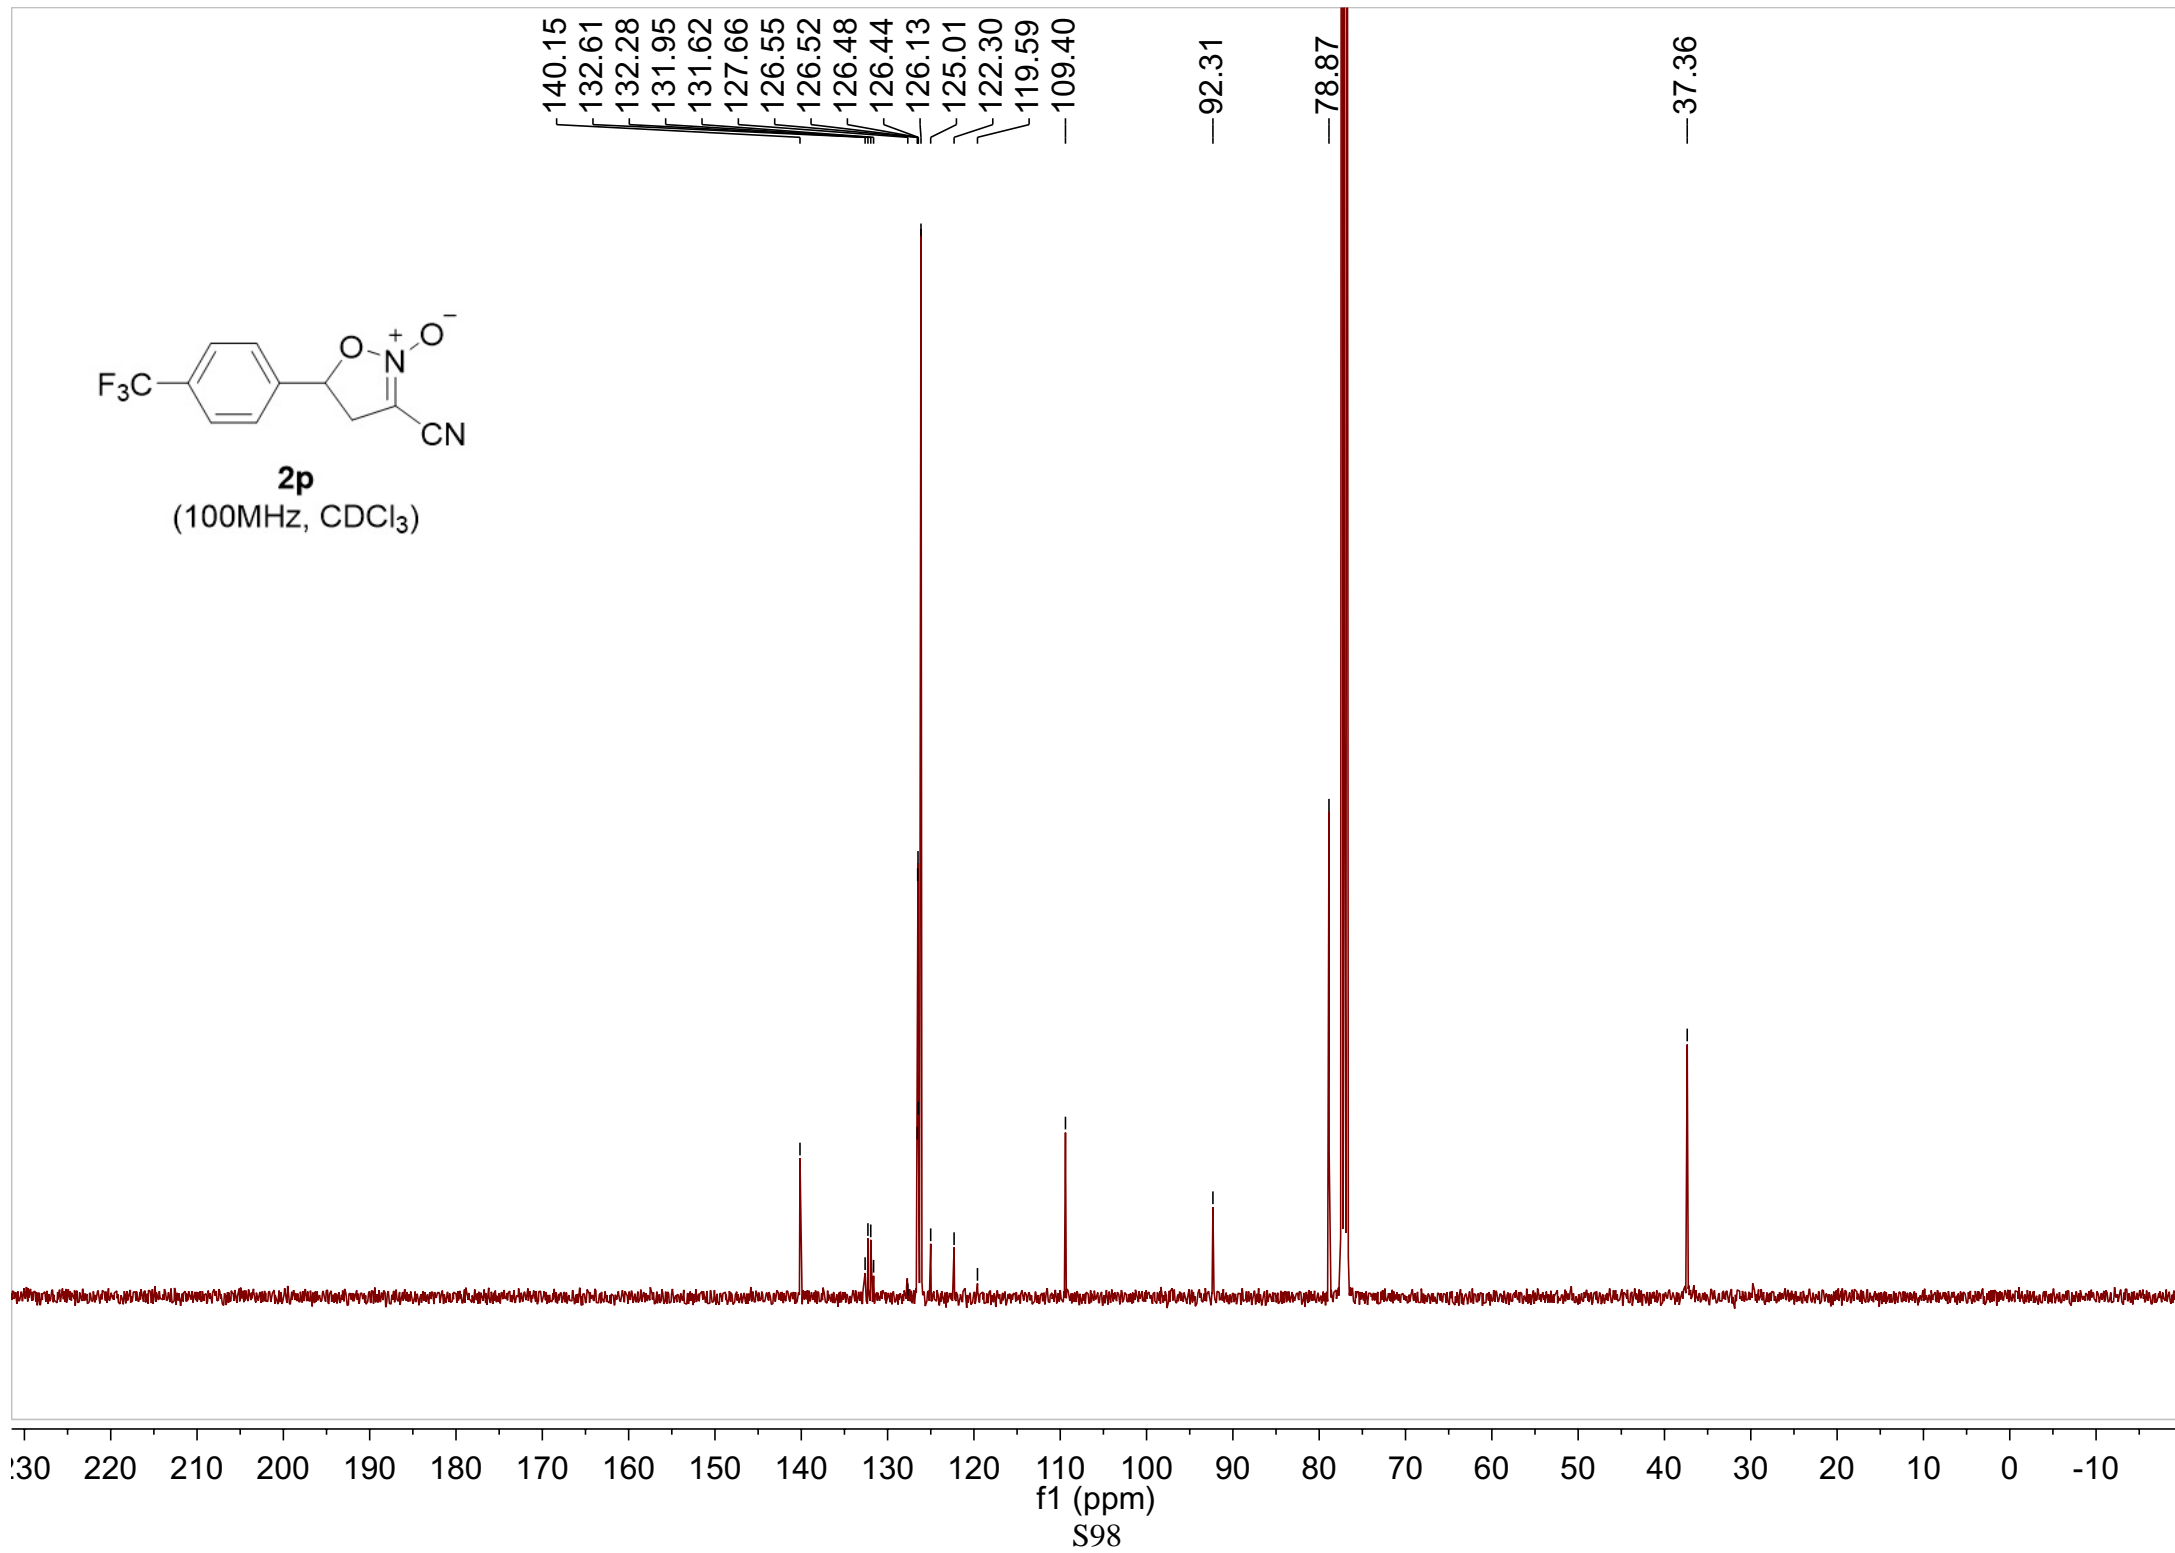

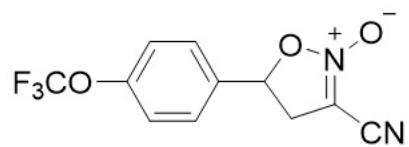

**2q**  
(600MHz, CDCl<sub>3</sub>)

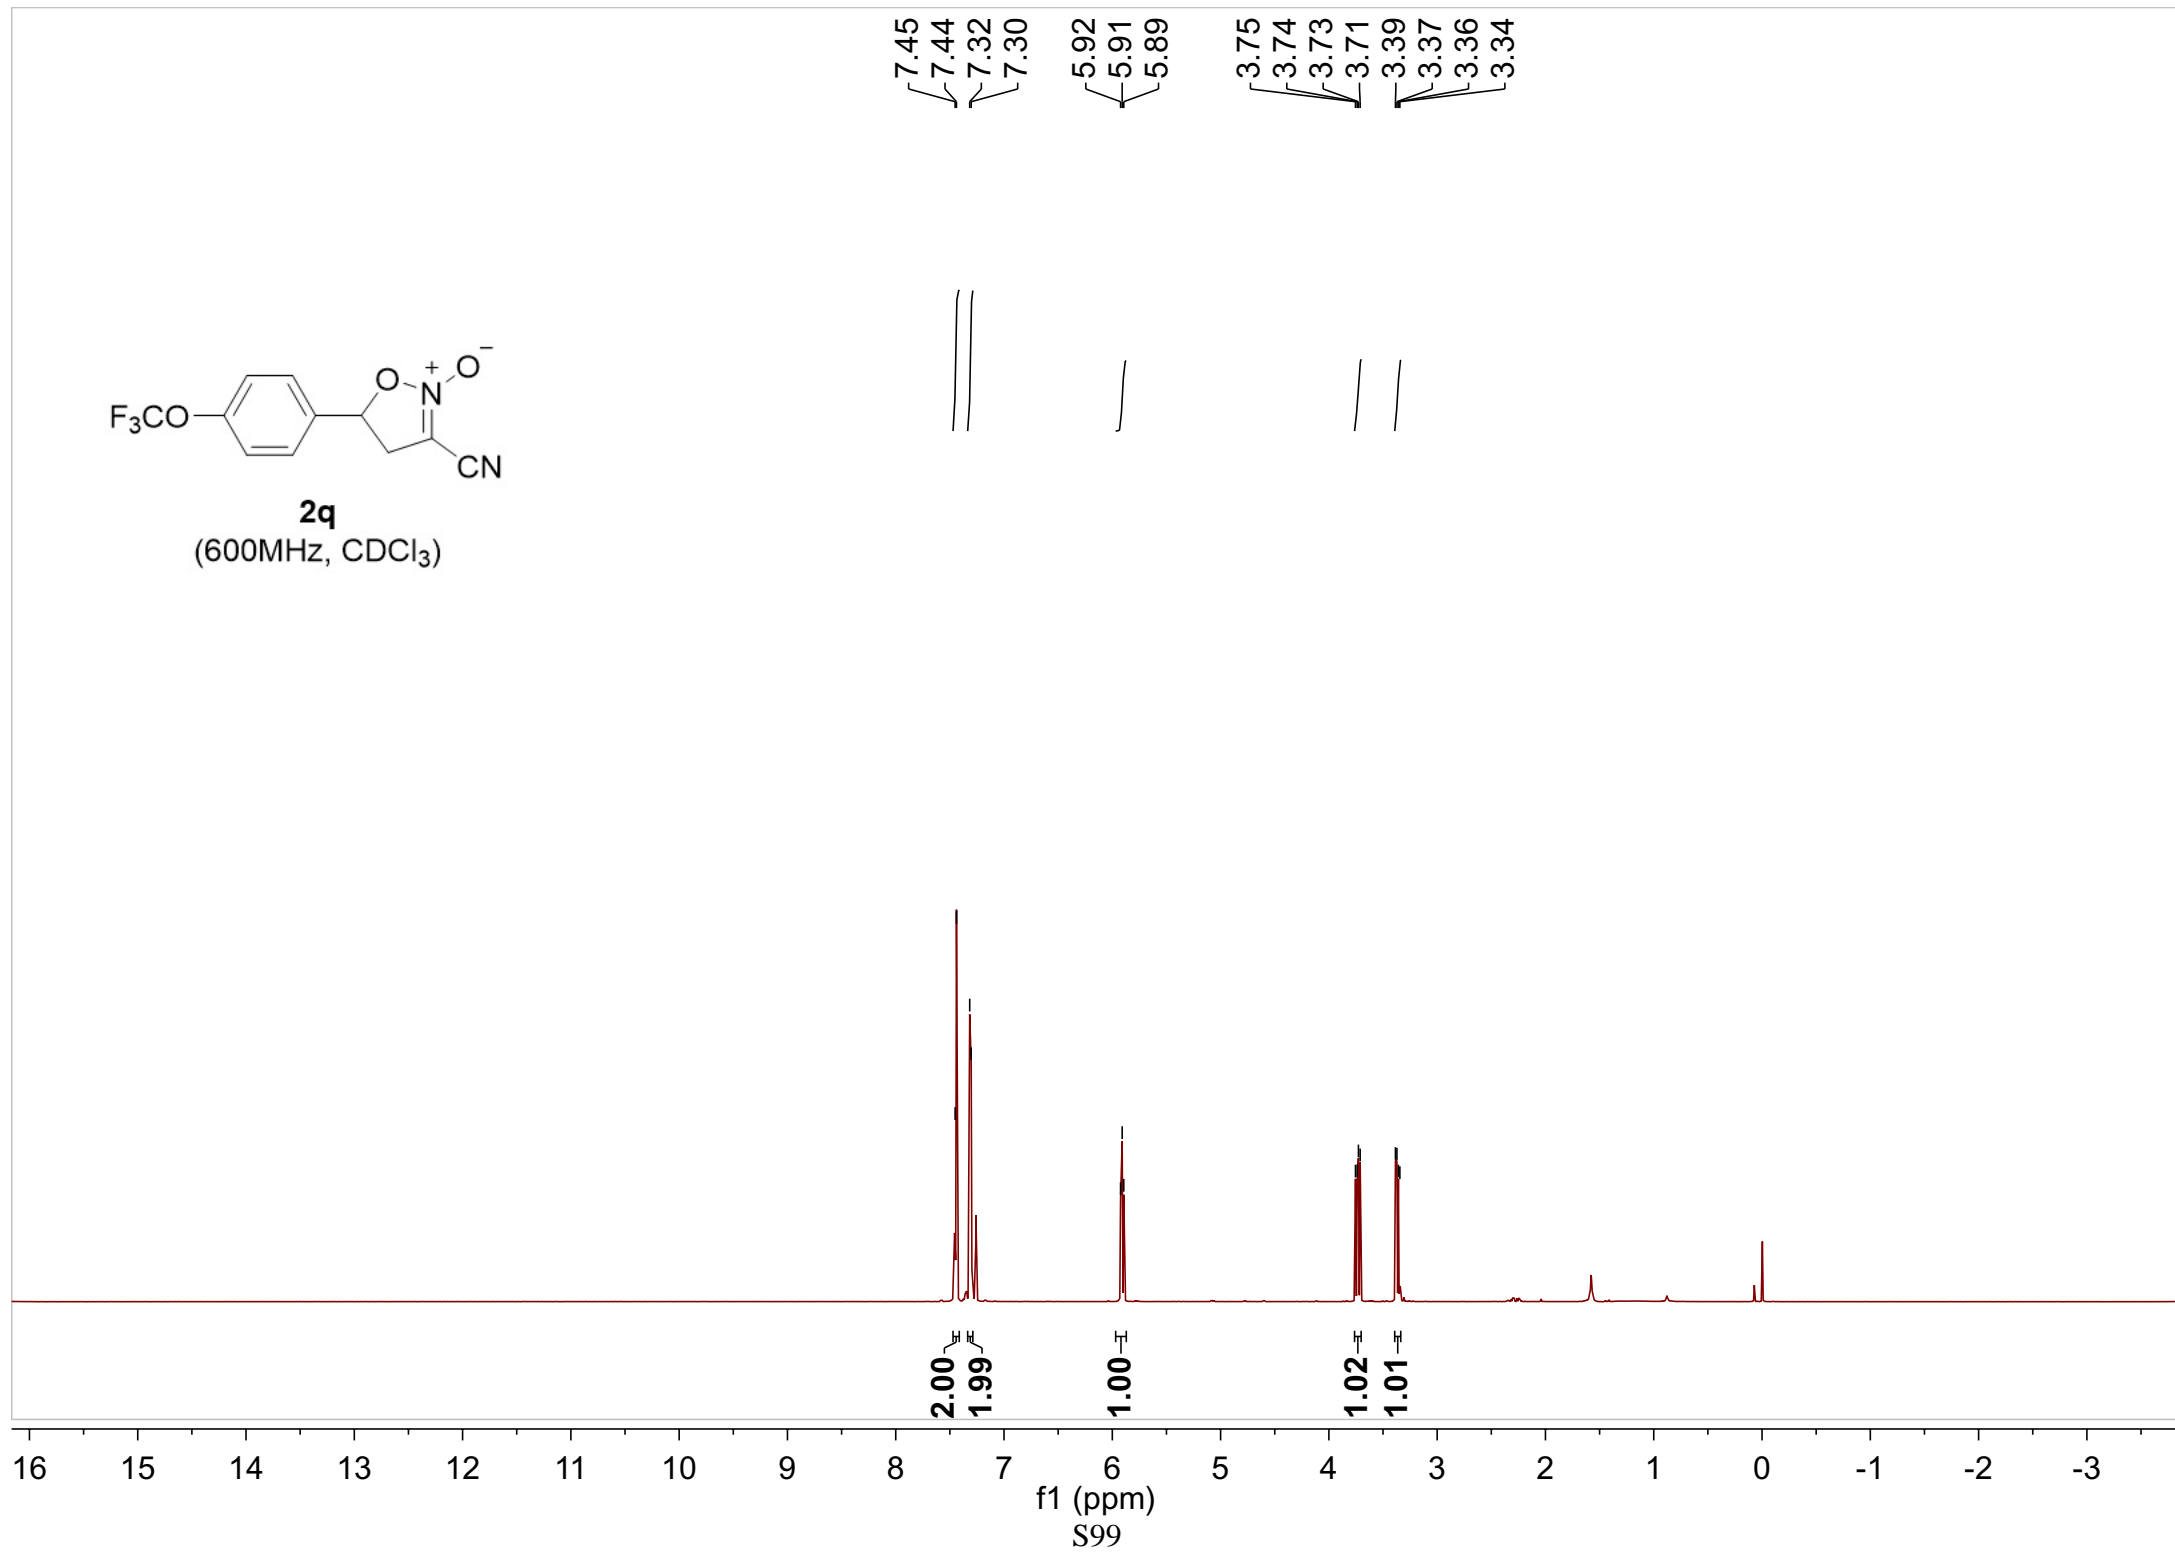

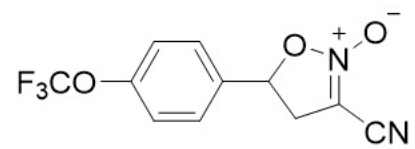

**2q**  
(565MHz, CDCl<sub>3</sub>)

---57.87

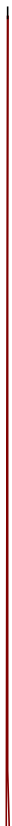

10 0 -10 -20 -30 -40 -50 -60 -70 -80 -90 -100 -110 -120 -130 -140 -150 -160 -170 -180 -190 -200 -210

f1 (ppm)  
S100

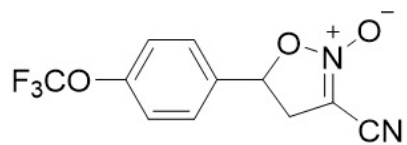

**2q**

(150MHz, CDCl<sub>3</sub>)

—150.17

134.58

127.59

122.92

121.21

119.50

117.78

—109.47

—92.54

—79.14

—37.23

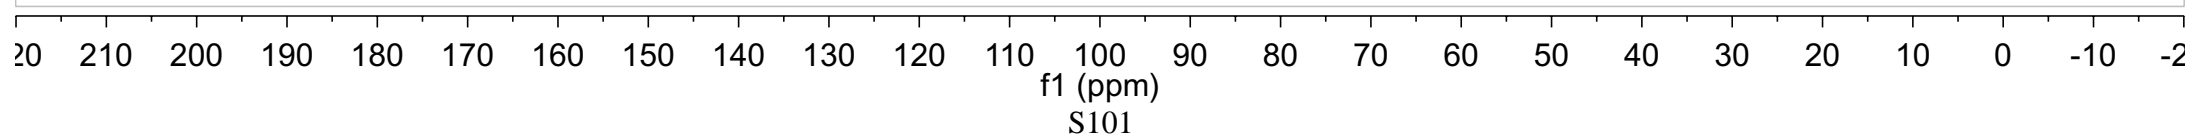

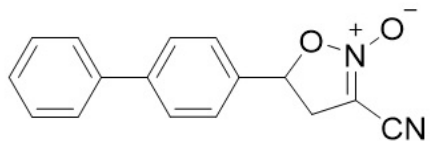

**2r**

(400MHz, Acetone- $d_6$ )

7.79  
7.78  
7.77  
7.77  
7.76  
7.71  
7.71  
7.70  
7.69  
7.69  
7.69  
7.68  
7.68  
7.51  
7.51  
7.49  
7.49  
7.49  
7.47  
7.47  
7.42  
7.42  
7.40  
6.28  
6.18  
6.16

3.99  
3.97  
3.95  
3.93  
3.71  
3.68  
3.66  
3.64

2.5 12.0 11.5 11.0 10.5 10.0 9.5 9.0 8.5 8.0 7.5 7.0 6.5 6.0 5.5 5.0 4.5 4.0 3.5 3.0 2.5 2.0 1.5 1.0 0.5 0.0 -0.5 -1.0 -1.5 -2.0

f1 (ppm)

S102

2.05  
4.16  
2.09  
1.01

0.97

0.98  
0.96

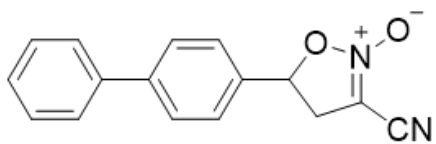

**2r**

(150MHz, CDCl<sub>3</sub>)

143.07  
140.03  
134.75  
129.06  
128.11  
128.06  
127.25  
126.56

—109.76

—92.84

—80.15

—37.27

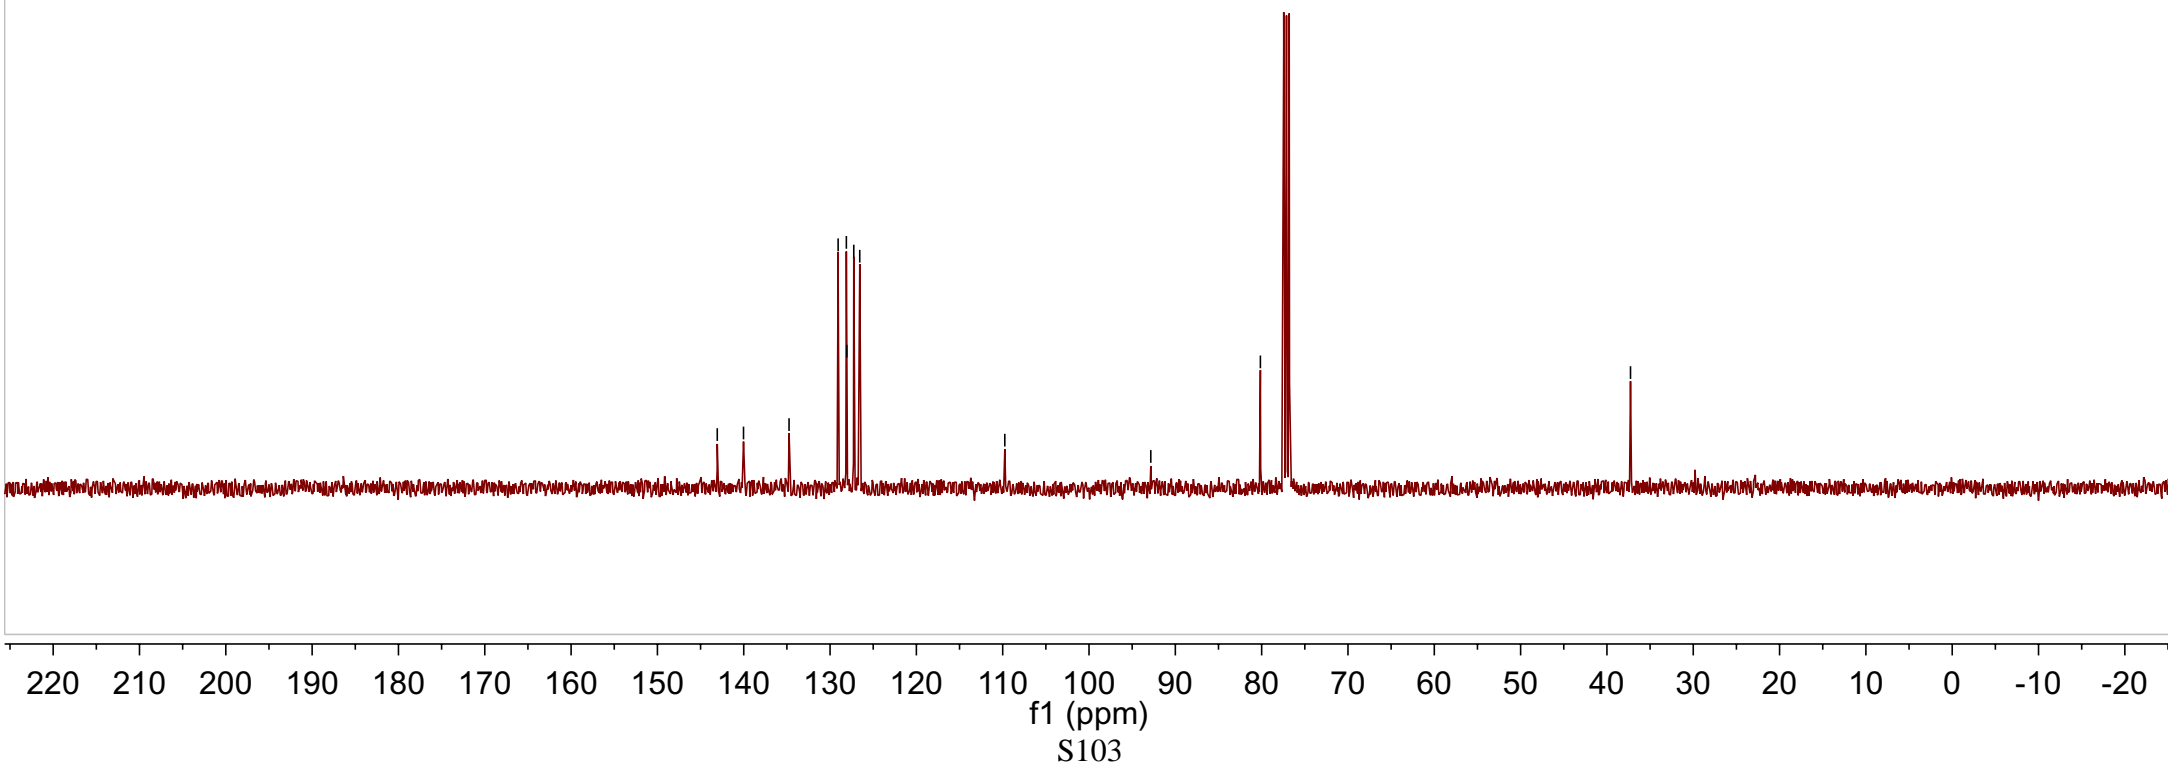

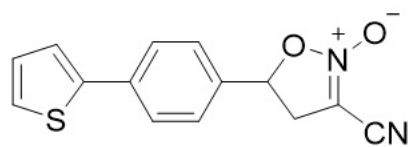

**2s**  
(600MHz, CDCl<sub>3</sub>)

7.70  
7.68  
7.41  
7.39  
7.37  
7.36  
7.34  
7.33  
7.12  
7.11  
7.10  
5.92  
5.90  
5.89  
3.73  
3.71  
3.70  
3.68  
3.43  
3.41  
3.40  
3.39

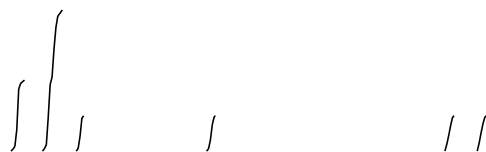

2.01  
3.99  
1.00  
1.00  
1.00  
1.00

16 15 14 13 12 11 10 9 8 7 6 5 4 3 2 1 0 -1 -2 -3

f1 (ppm)  
S104



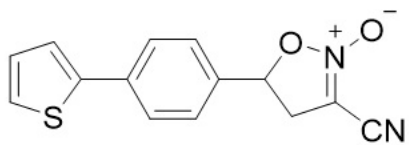

**2s**

(150MHz, CDCl<sub>3</sub>)

143.07  
136.28  
134.78  
128.41  
128.08  
126.80  
126.74  
125.94  
124.16  
120.48  
— 109.73

— 92.77

— 80.06

— 37.28

— 0.14

20 210 200 190 180 170 160 150 140 130 120 110 100 90 80 70 60 50 40 30 20 10 0 -10

f1 (ppm)

S105

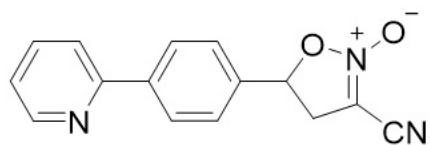

**2t**  
(600MHz, CDCl<sub>3</sub>)

8.72  
8.71  
8.71  
8.71  
8.71  
8.70  
8.70  
8.09  
8.07  
7.81  
7.80  
7.79  
7.78  
7.77  
7.77  
7.76  
7.75  
7.75  
7.74  
7.73  
7.73  
7.50  
7.48  
7.29  
7.29  
7.28  
7.28  
7.27  
7.26  
7.26  
5.97  
5.94  
5.92  
3.76  
3.74  
3.72  
3.69  
3.45  
3.43  
3.41  
3.39

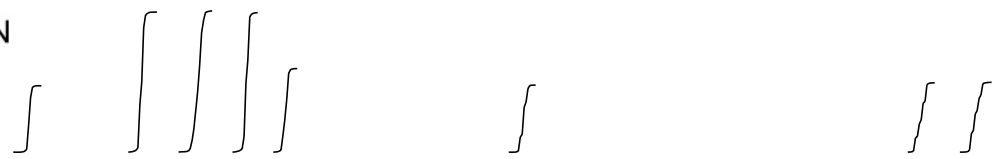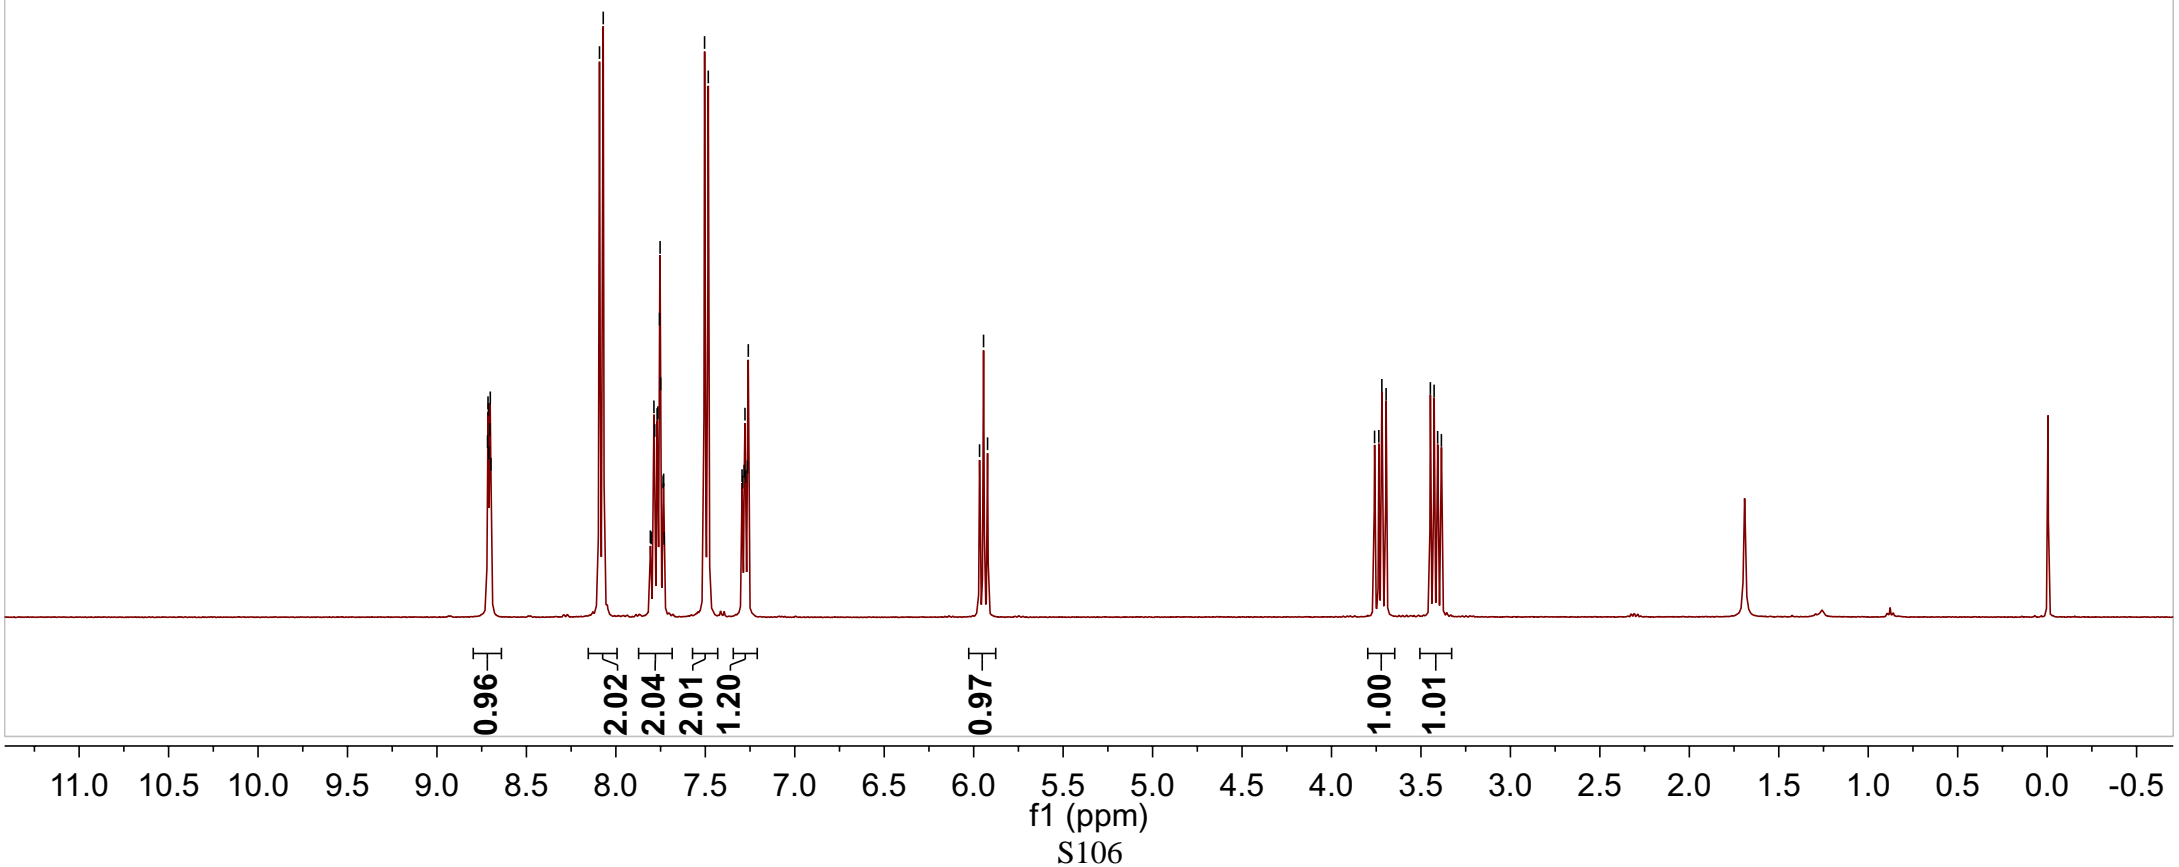

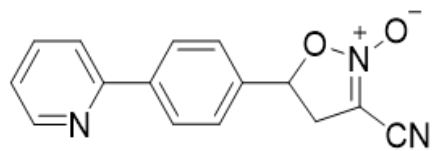

**2t**

(150MHz, CDCl<sub>3</sub>)

- 156.23
- 149.97
- 141.08
- 137.08
- 136.47
- 127.89
- 126.43
- 122.85
- 120.79
- 109.73
- 92.85
- 80.01
- 37.29

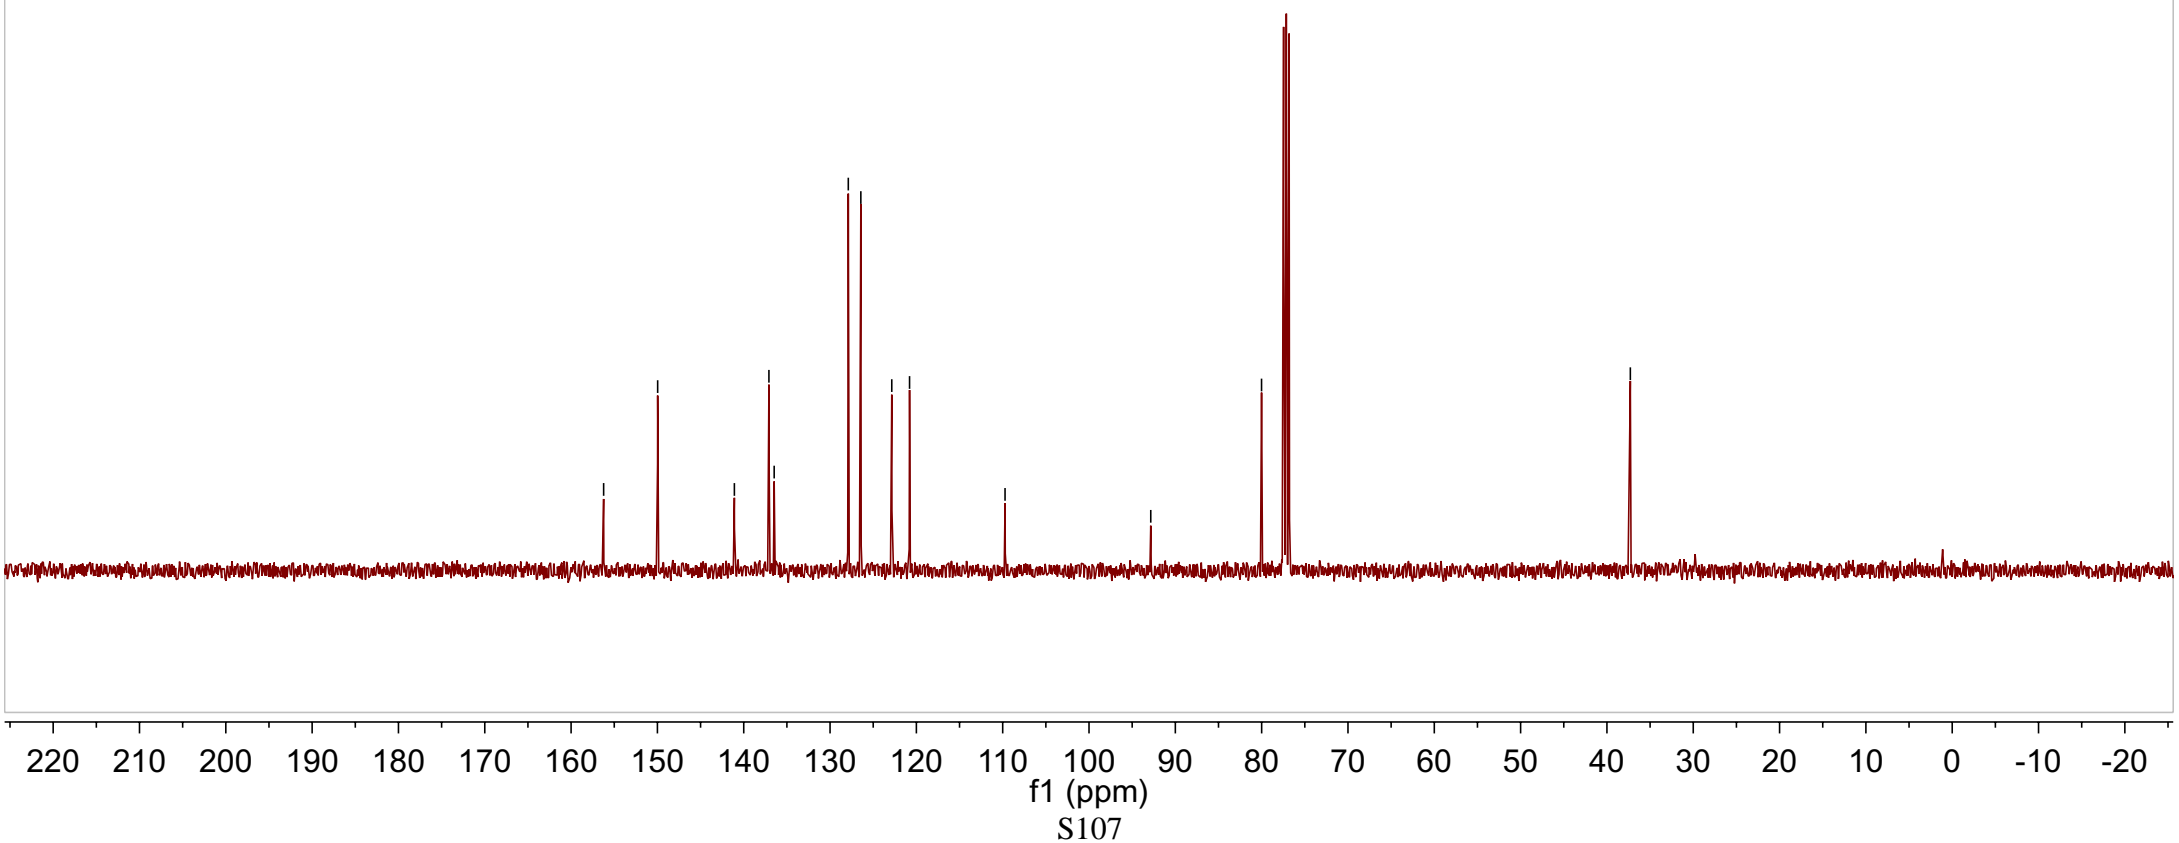

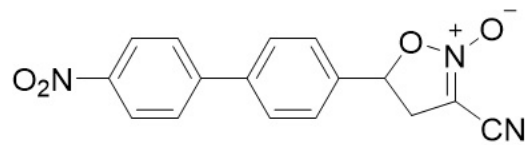

**2u**

(600MHz, CDCl<sub>3</sub>)

8.32  
8.30  
7.75  
7.73  
7.72  
7.71  
7.54  
7.53  
5.99  
5.98  
5.97  
3.81  
3.79  
3.78  
3.76  
3.45  
3.44  
3.43  
3.41  
3.40

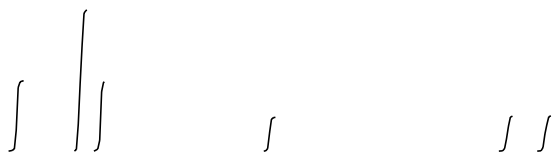

1.99  
4.00  
1.96  
0.96  
0.99  
1.00

16 15 14 13 12 11 10 9 8 7 6 5 4 3 2 1 0 -1 -2 -3

f1 (ppm)  
S108

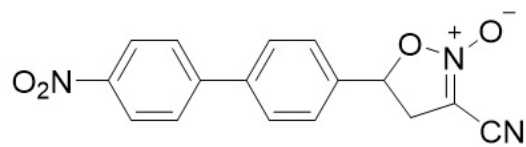

**2u**  
(150MHz, CDCl<sub>3</sub>)

147.59  
146.38  
140.48  
136.76  
128.43  
128.05  
126.81  
124.36

109.67

92.77

79.68

37.33

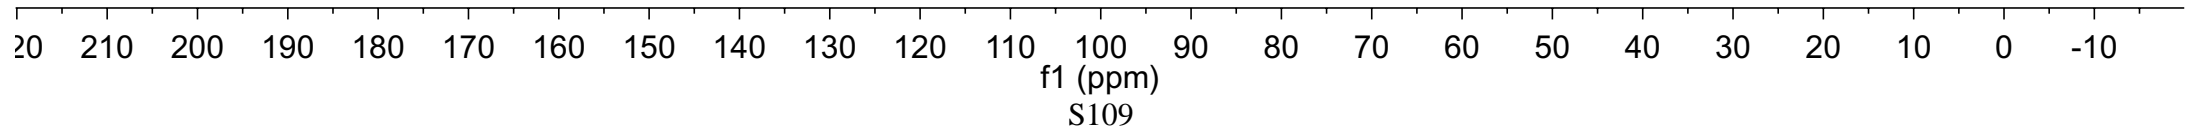

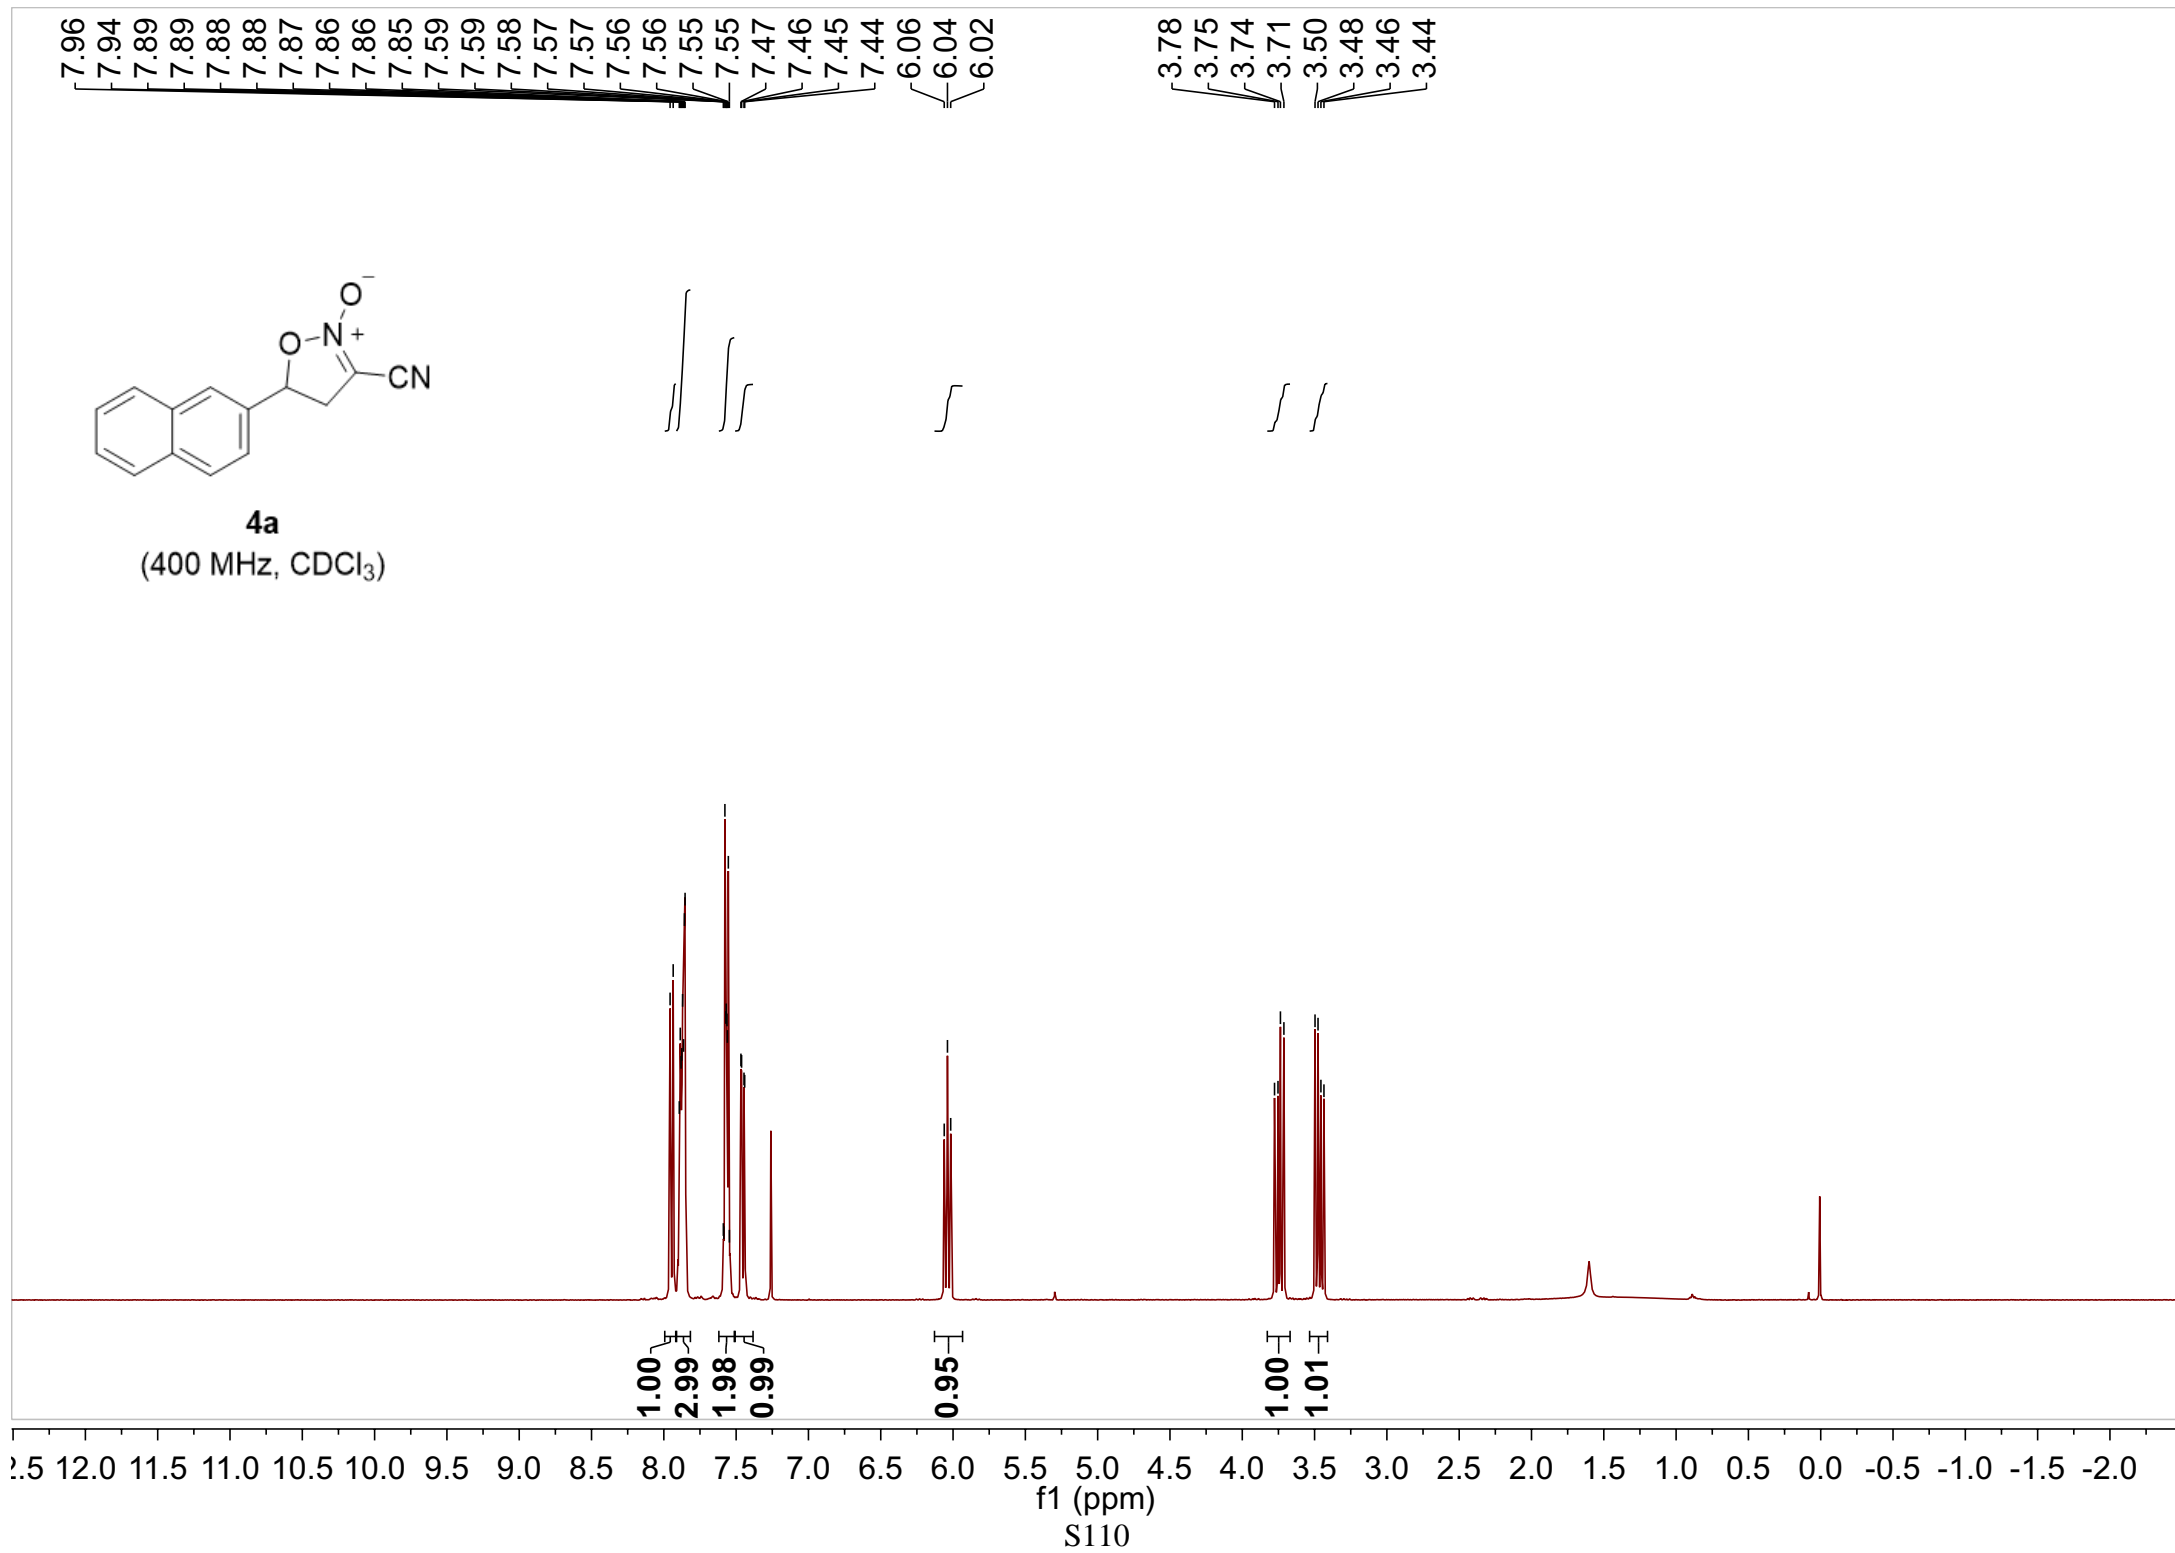

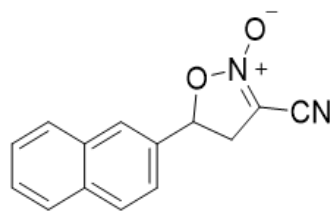

**4a**

(125 MHz, CDCl<sub>3</sub>)

133.82  
133.11  
133.03  
129.78  
128.31  
128.00  
127.41  
127.24  
125.95  
122.62  
— 109.81

— 92.93

— 80.48

— 37.27

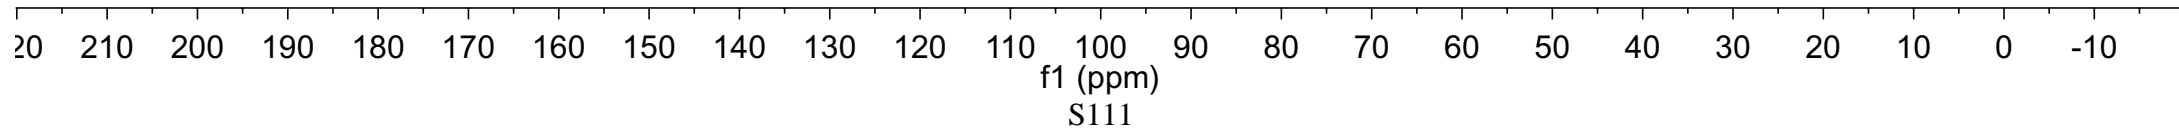

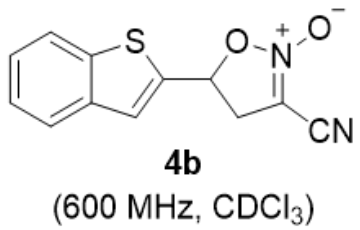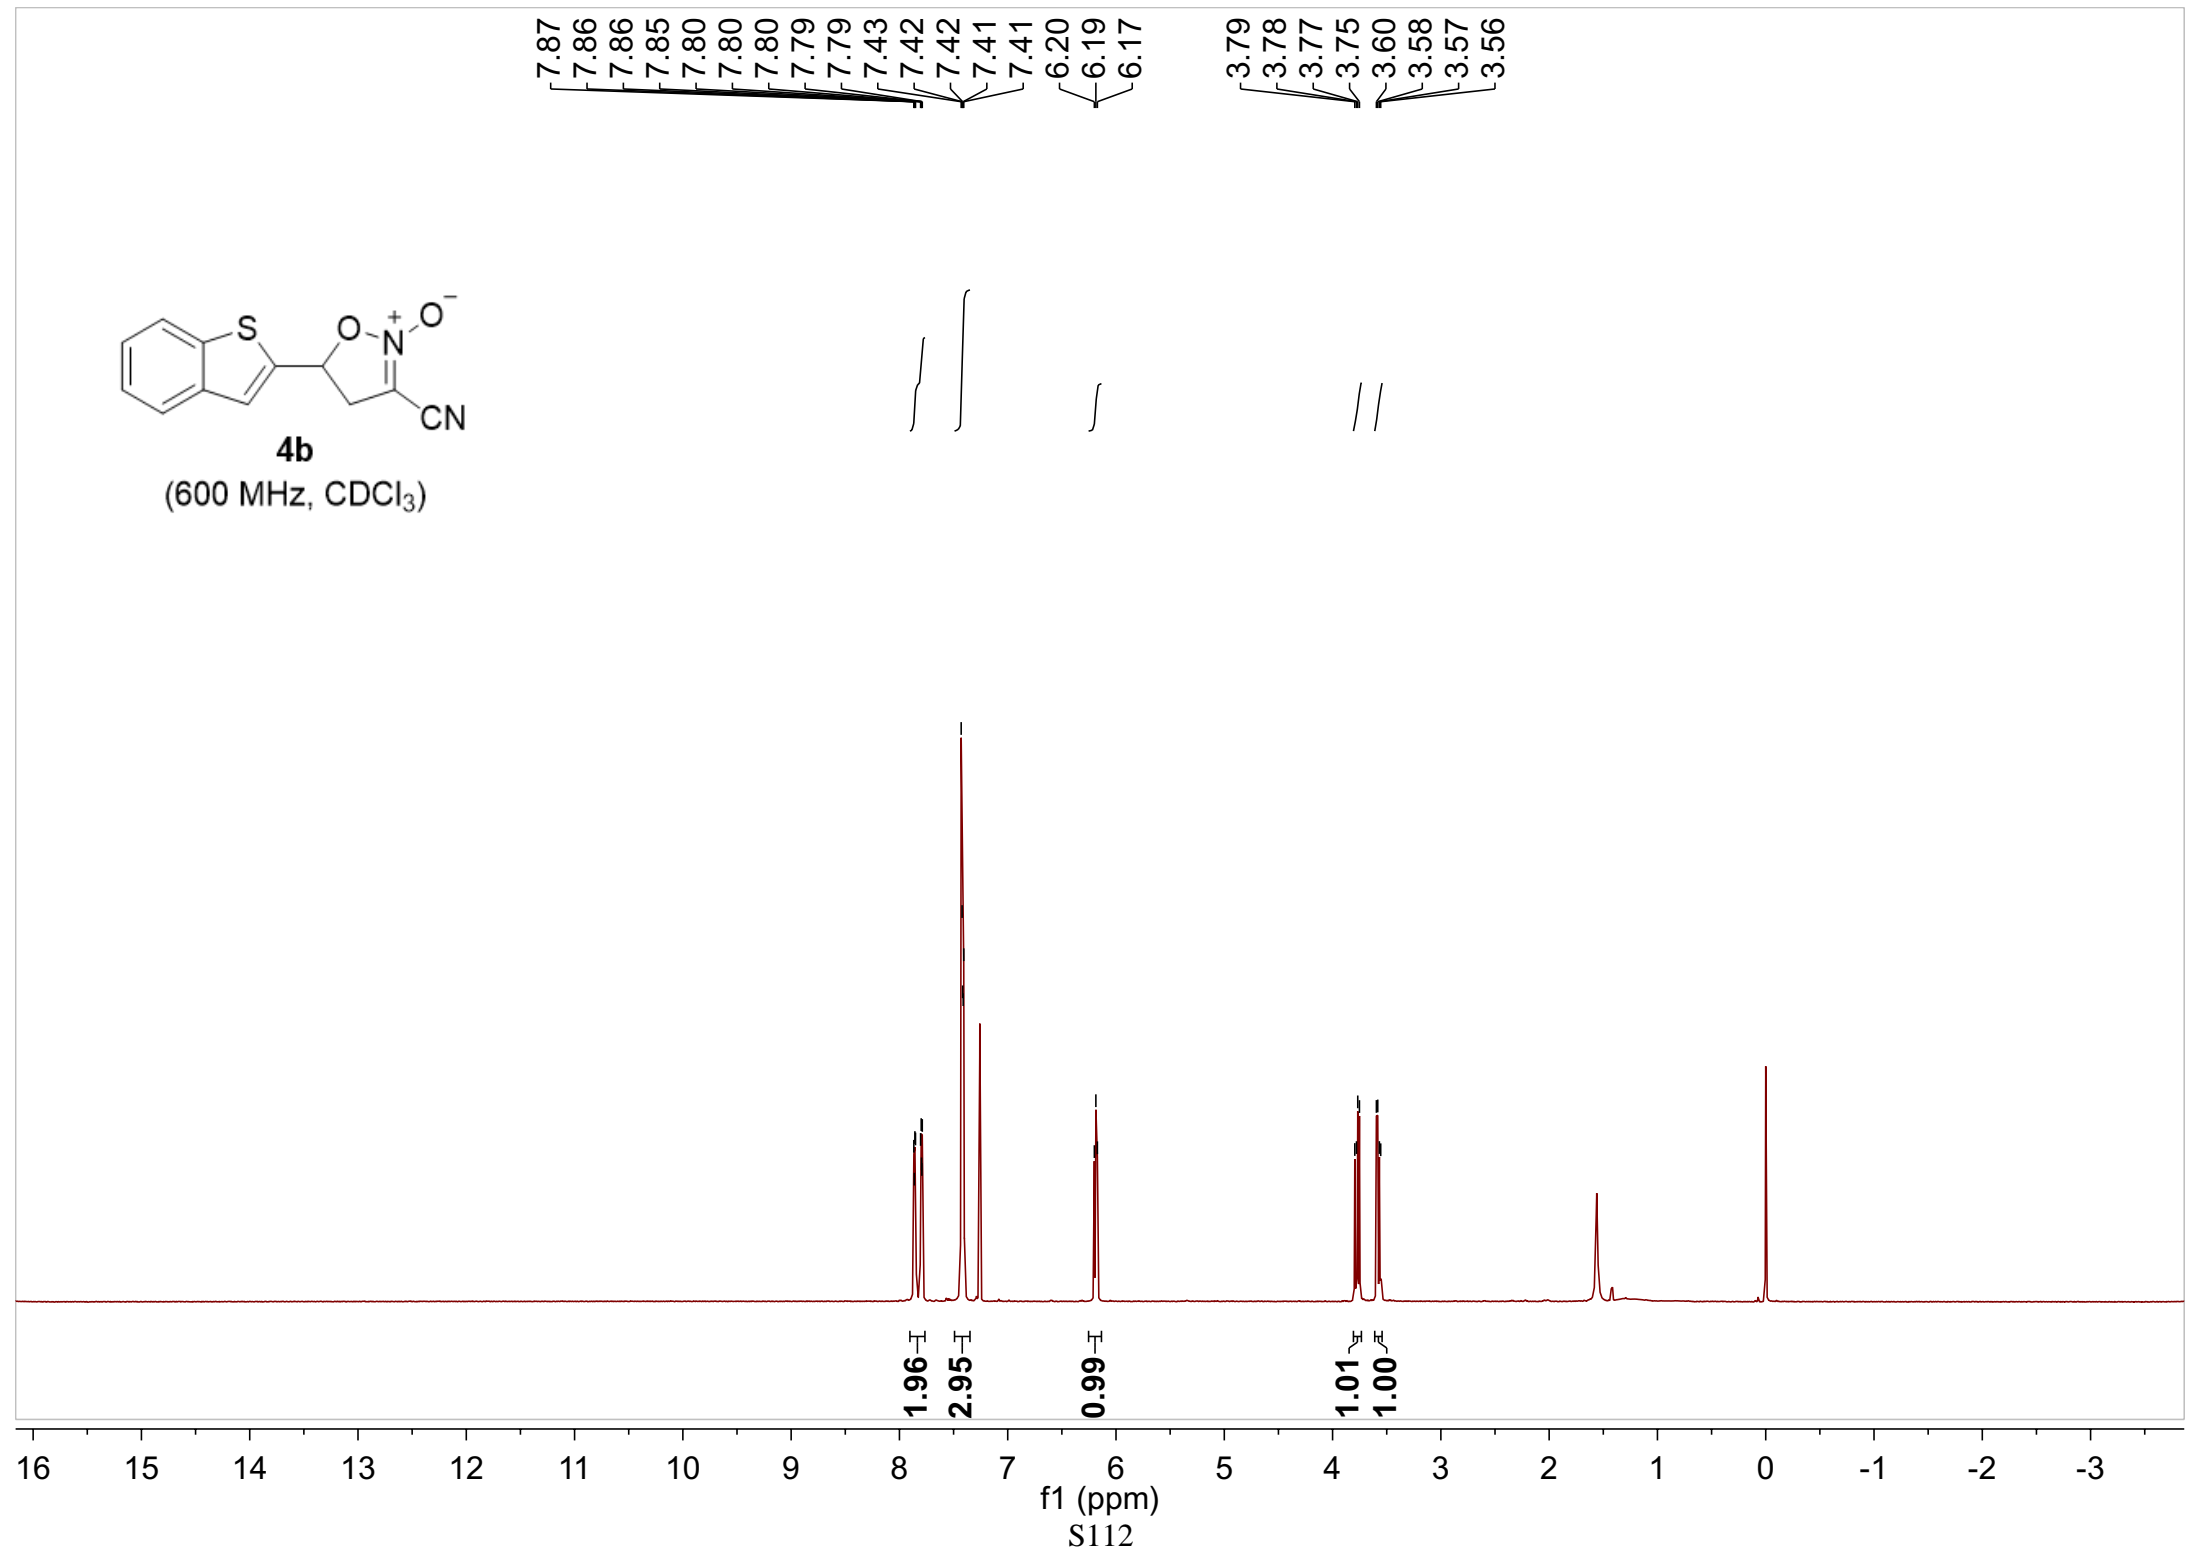



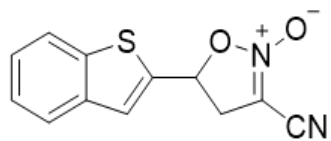

**4b**

(150 MHz, CDCl<sub>3</sub>)

140.01  
138.73  
138.23  
125.99  
125.29  
124.67  
124.51  
122.84

—109.54

—92.56

—76.73

—37.19

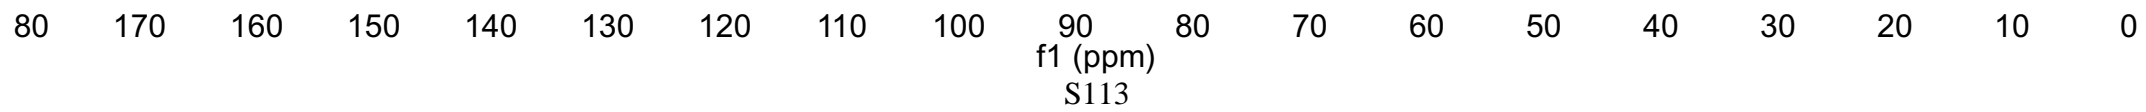

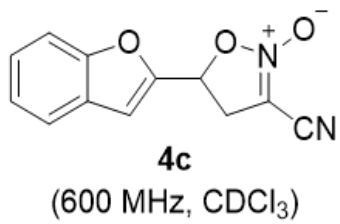

7.62 7.62 7.62 7.61 7.60 7.60 7.53 7.52 7.41 7.40 7.39 7.39 7.39 7.38 7.38 7.31 7.31 7.29 7.28 7.28 6.93 6.03 6.01 6.01 6.00 3.77 3.76 3.75 3.73 3.72 3.71 3.69 3.68

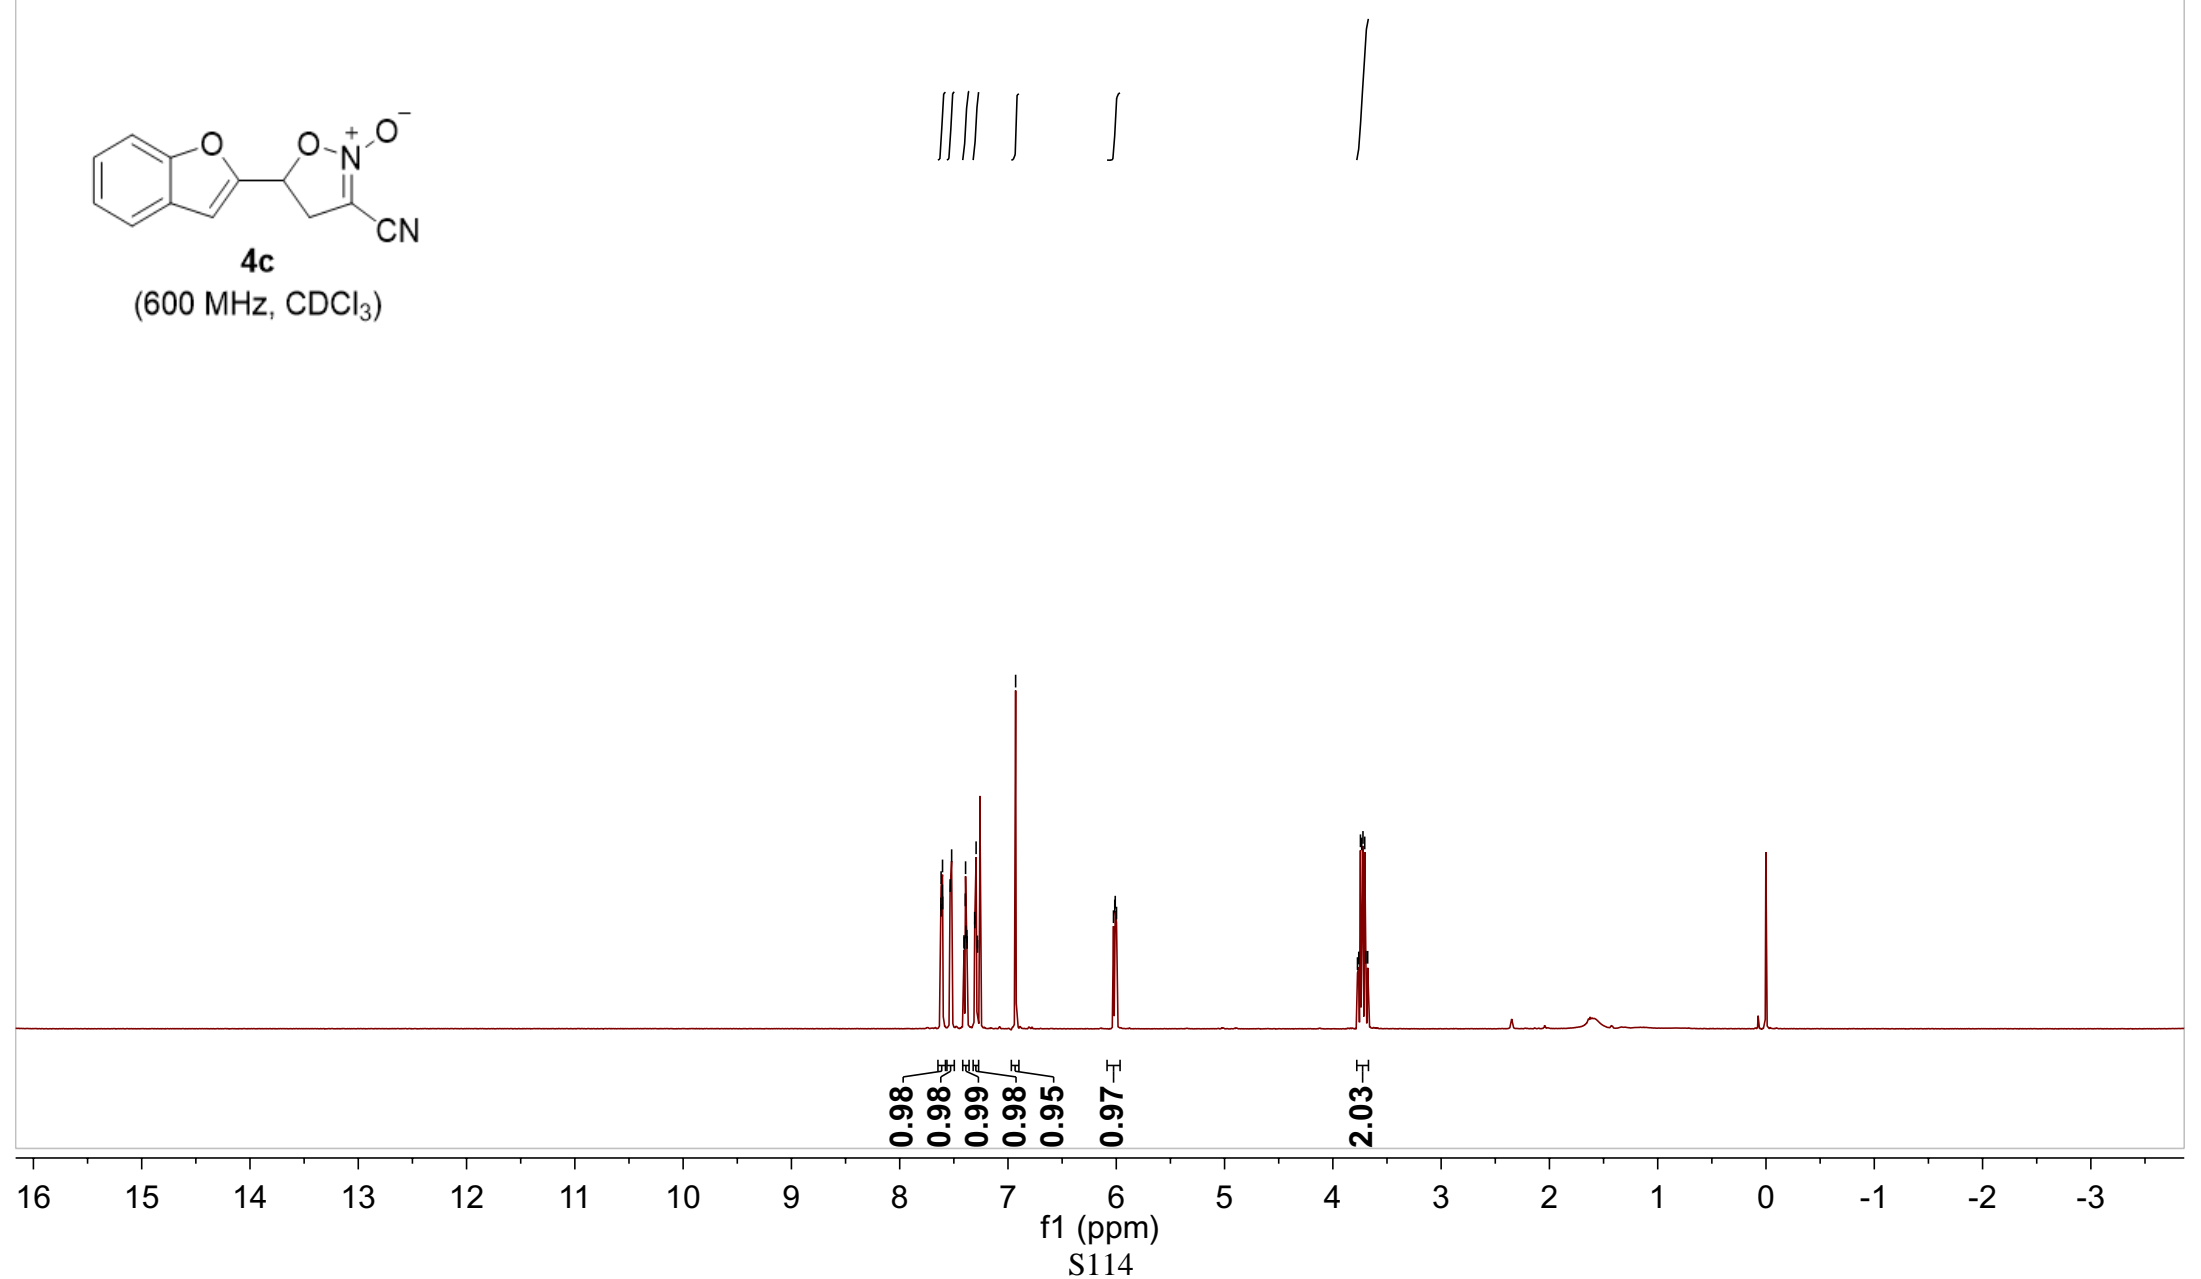

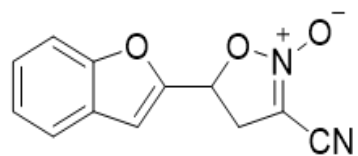

**4c**

(150 MHz, CDCl<sub>3</sub>)

—155.62

—149.49

∧127.14

∧126.30

∧123.81

∧122.02

∧111.90

∧109.61

∧108.30

—92.49

—73.40

—33.49

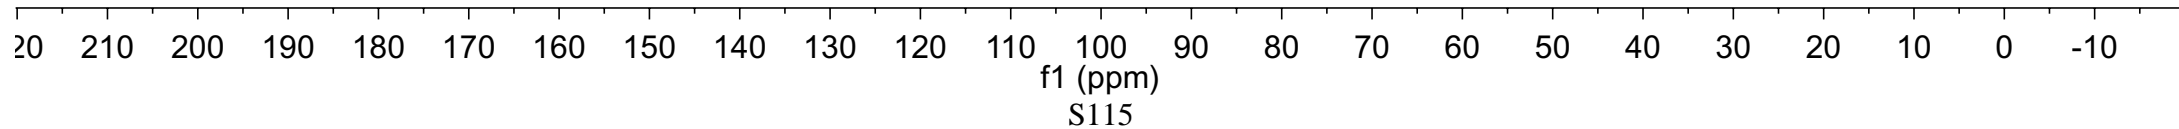

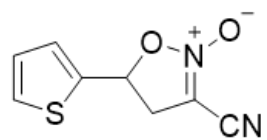

**4d**

(500 MHz, CDCl<sub>3</sub>)

7.47  
7.46  
7.46  
7.45  
7.22  
7.22  
7.21  
7.21  
7.21  
7.08  
7.07  
7.07  
7.06  
6.14  
6.13  
6.13  
6.12  
6.11  
3.74  
3.73  
3.71  
3.69  
3.56  
3.54  
3.52  
3.51

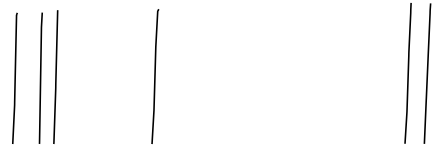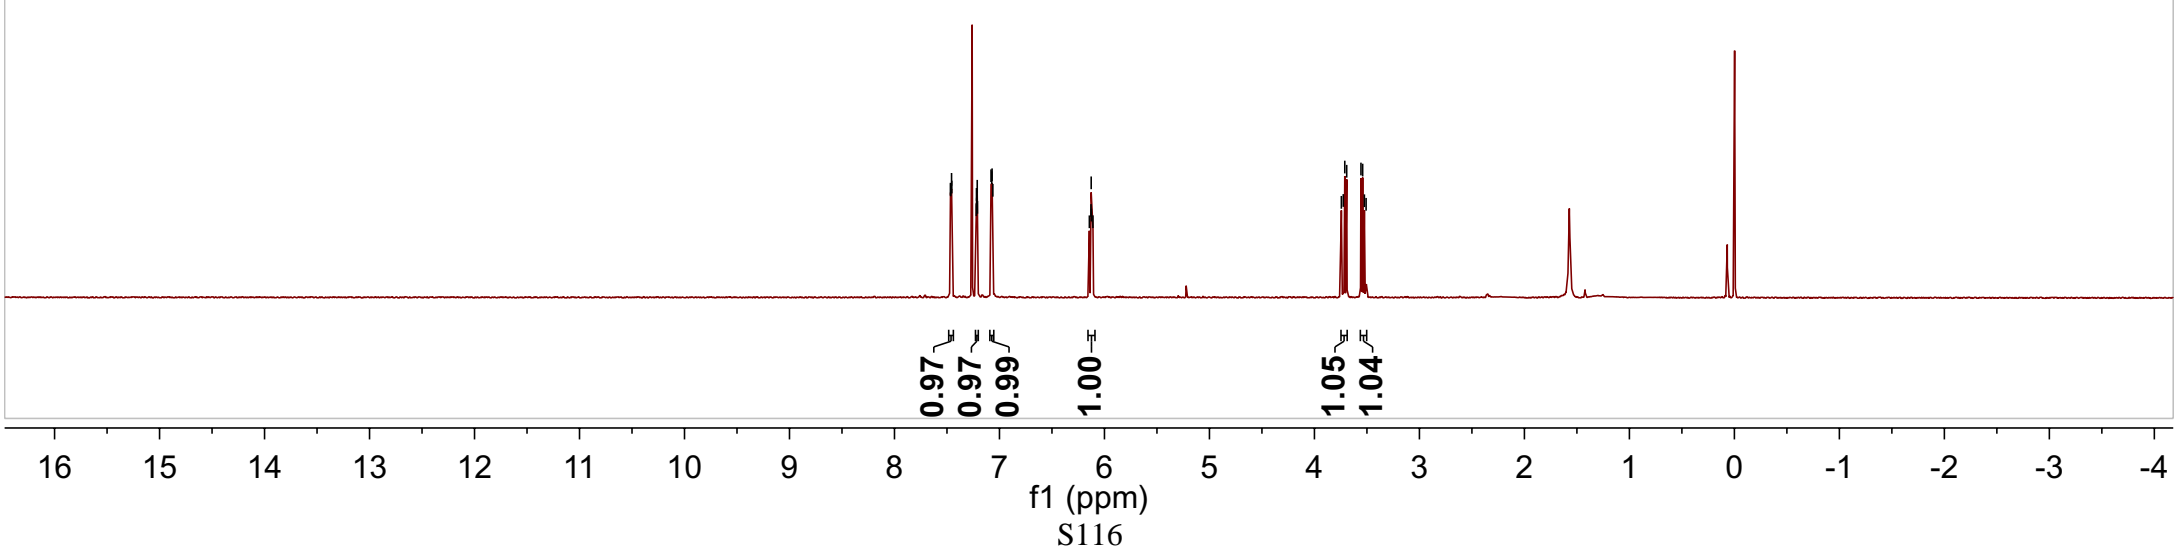

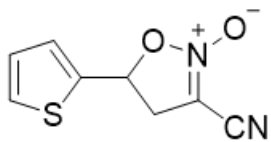

**4d**

(125 MHz, CDCl<sub>3</sub>)

—137.65

128.26

128.23

127.65

—109.63

—92.82

—76.36

—37.34

210 200 190 180 170 160 150 140 130 120 110 100 90 80 70 60 50 40 30 20 10 0 -10

f1 (ppm)

S117

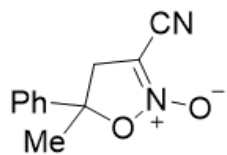

**4e**  
(400 MHz, CDCl<sub>3</sub>)

7.46  
7.46  
7.45  
7.45  
7.44  
7.44  
7.44  
7.43  
7.42  
7.41  
7.40  
7.39  
7.39  
7.38  
7.38  
7.37  
7.37  
7.36

3.54  
3.50  
3.49  
3.45

1.88

2.5 12.0 11.5 11.0 10.5 10.0 9.5 9.0 8.5 8.0 7.5 7.0 6.5 6.0 5.5 5.0 4.5 4.0 3.5 3.0 2.5 2.0 1.5 1.0 0.5 0.0 -0.5 -1.0 -1.5 -2.0

f1 (ppm)

S118

5.01

2.00

3.00

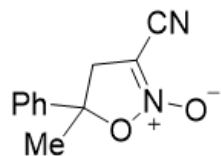

**4e**

(100 MHz, CDCl<sub>3</sub>)

—141.44

∧129.24

∧128.93

∧123.97

—109.92

—93.40

—86.81

—43.31

—27.88

220 210 200 190 180 170 160 150 140 130 120 110 100 90 80 70 60 50 40 30 20 10 0 -10 -20

f1 (ppm)

S119

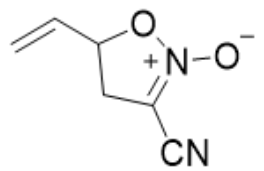

**4f**

(400 MHz, CDCl<sub>3</sub>)

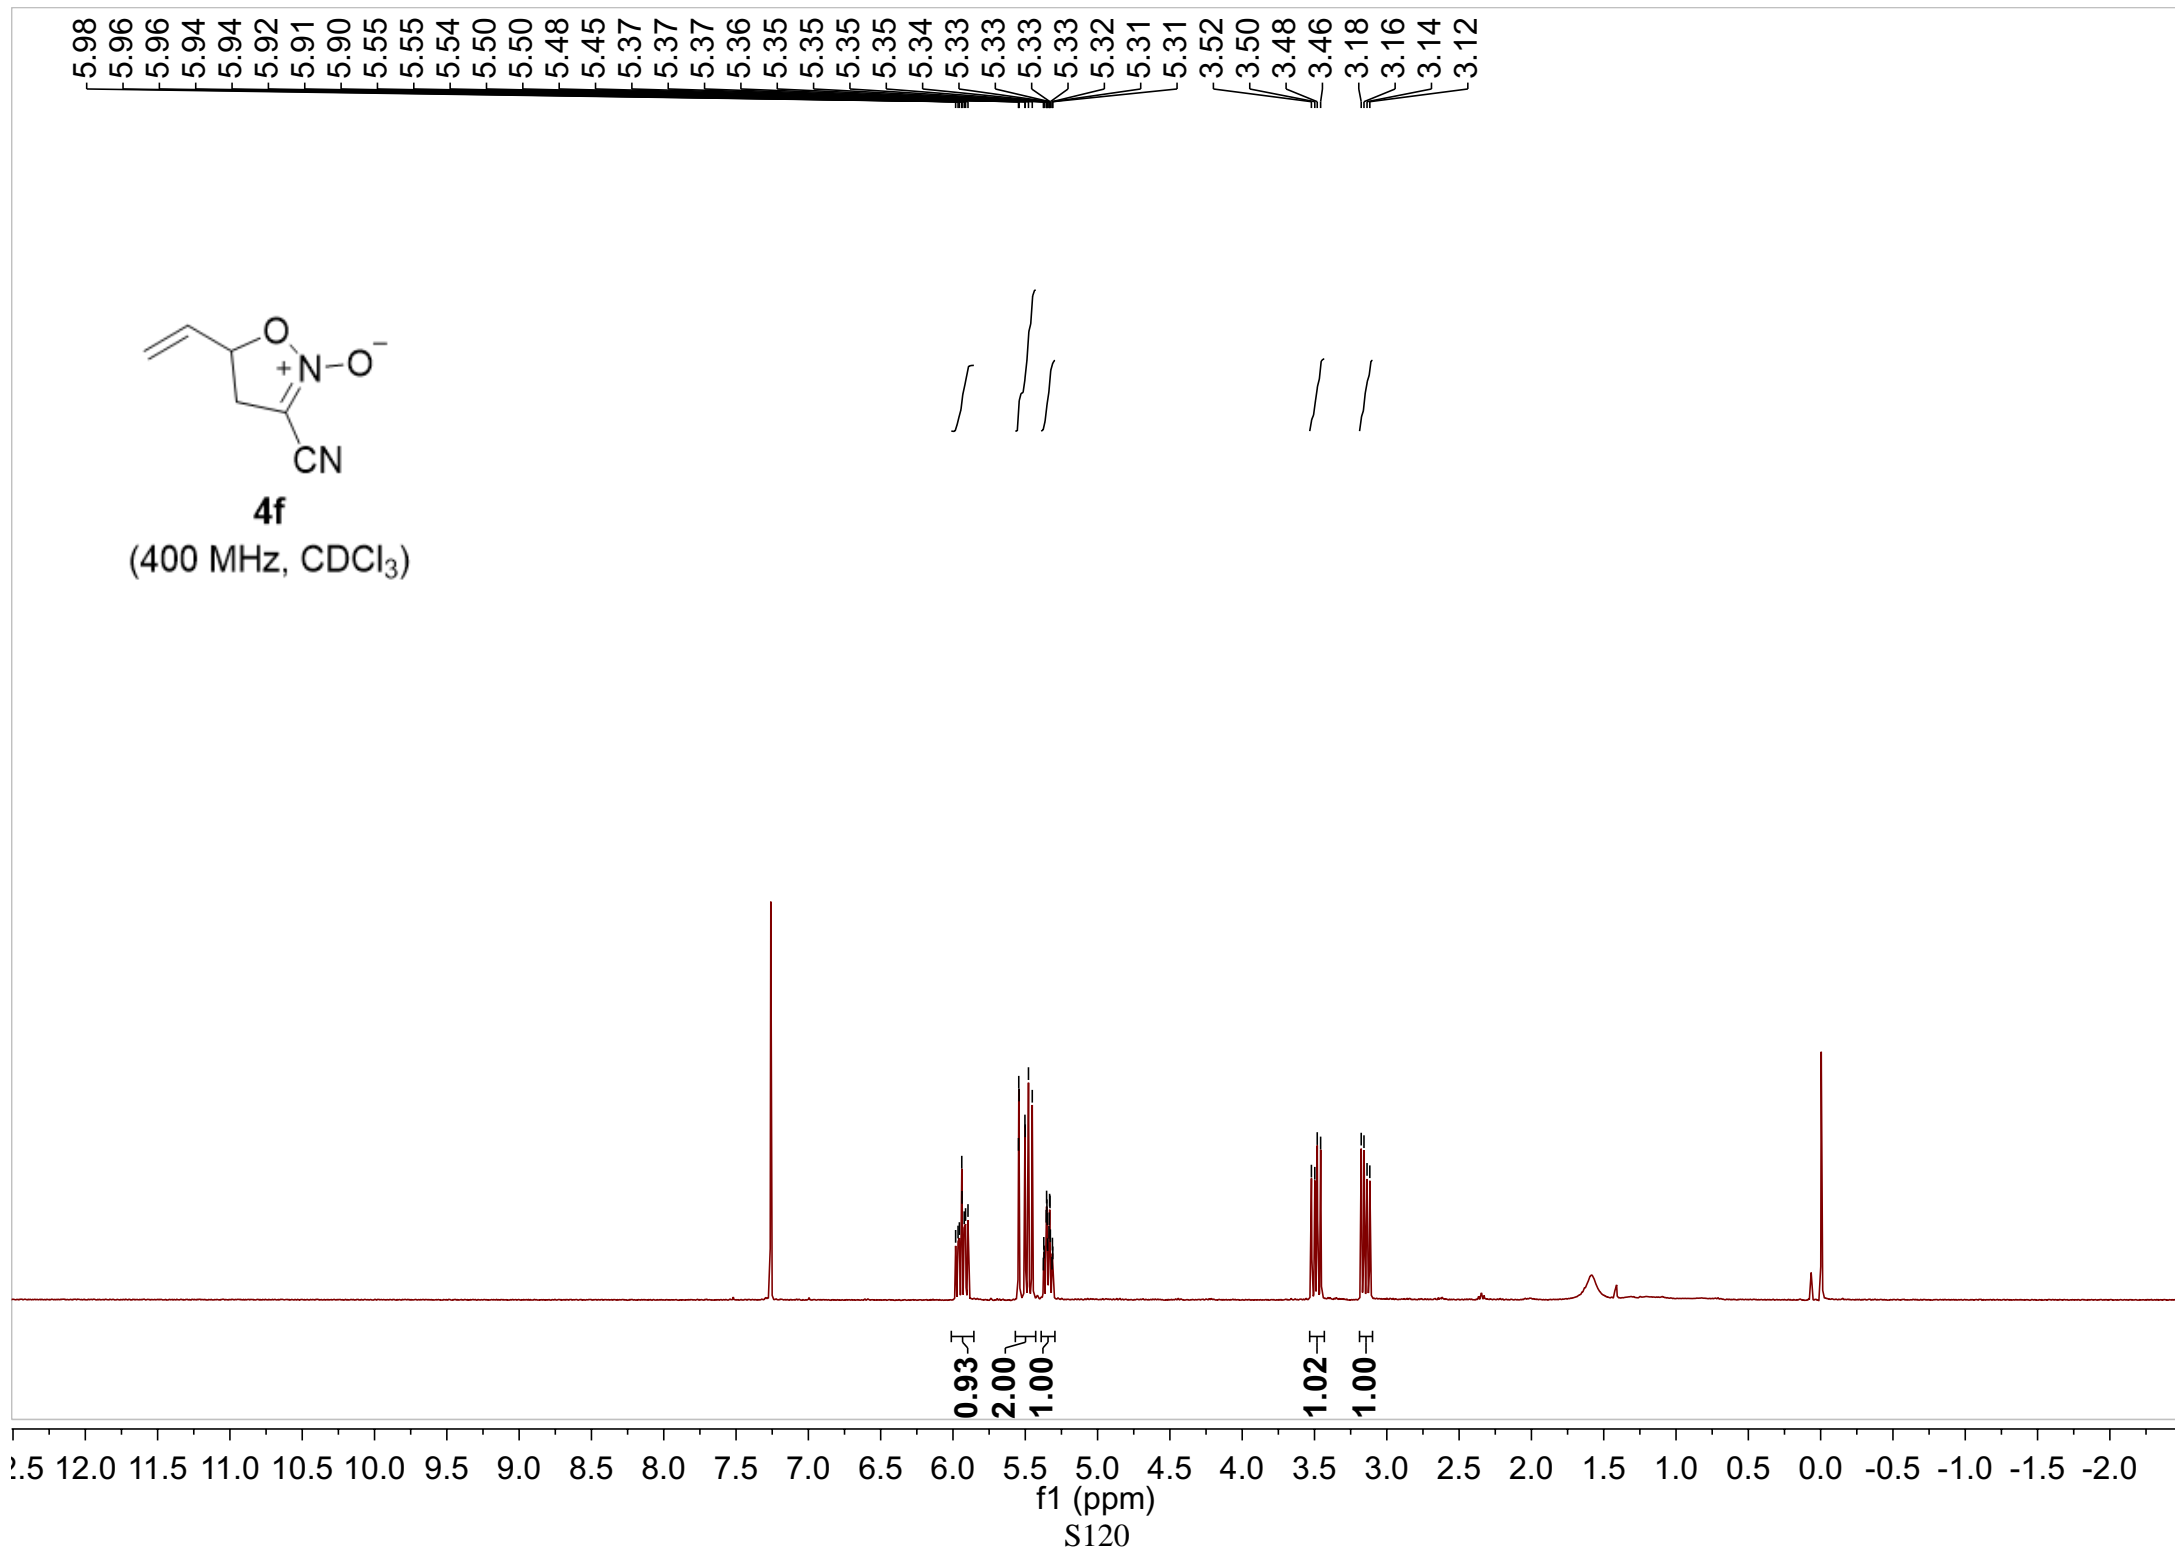



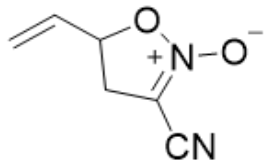

**4f**  
(150 MHz, CDCl<sub>3</sub>)

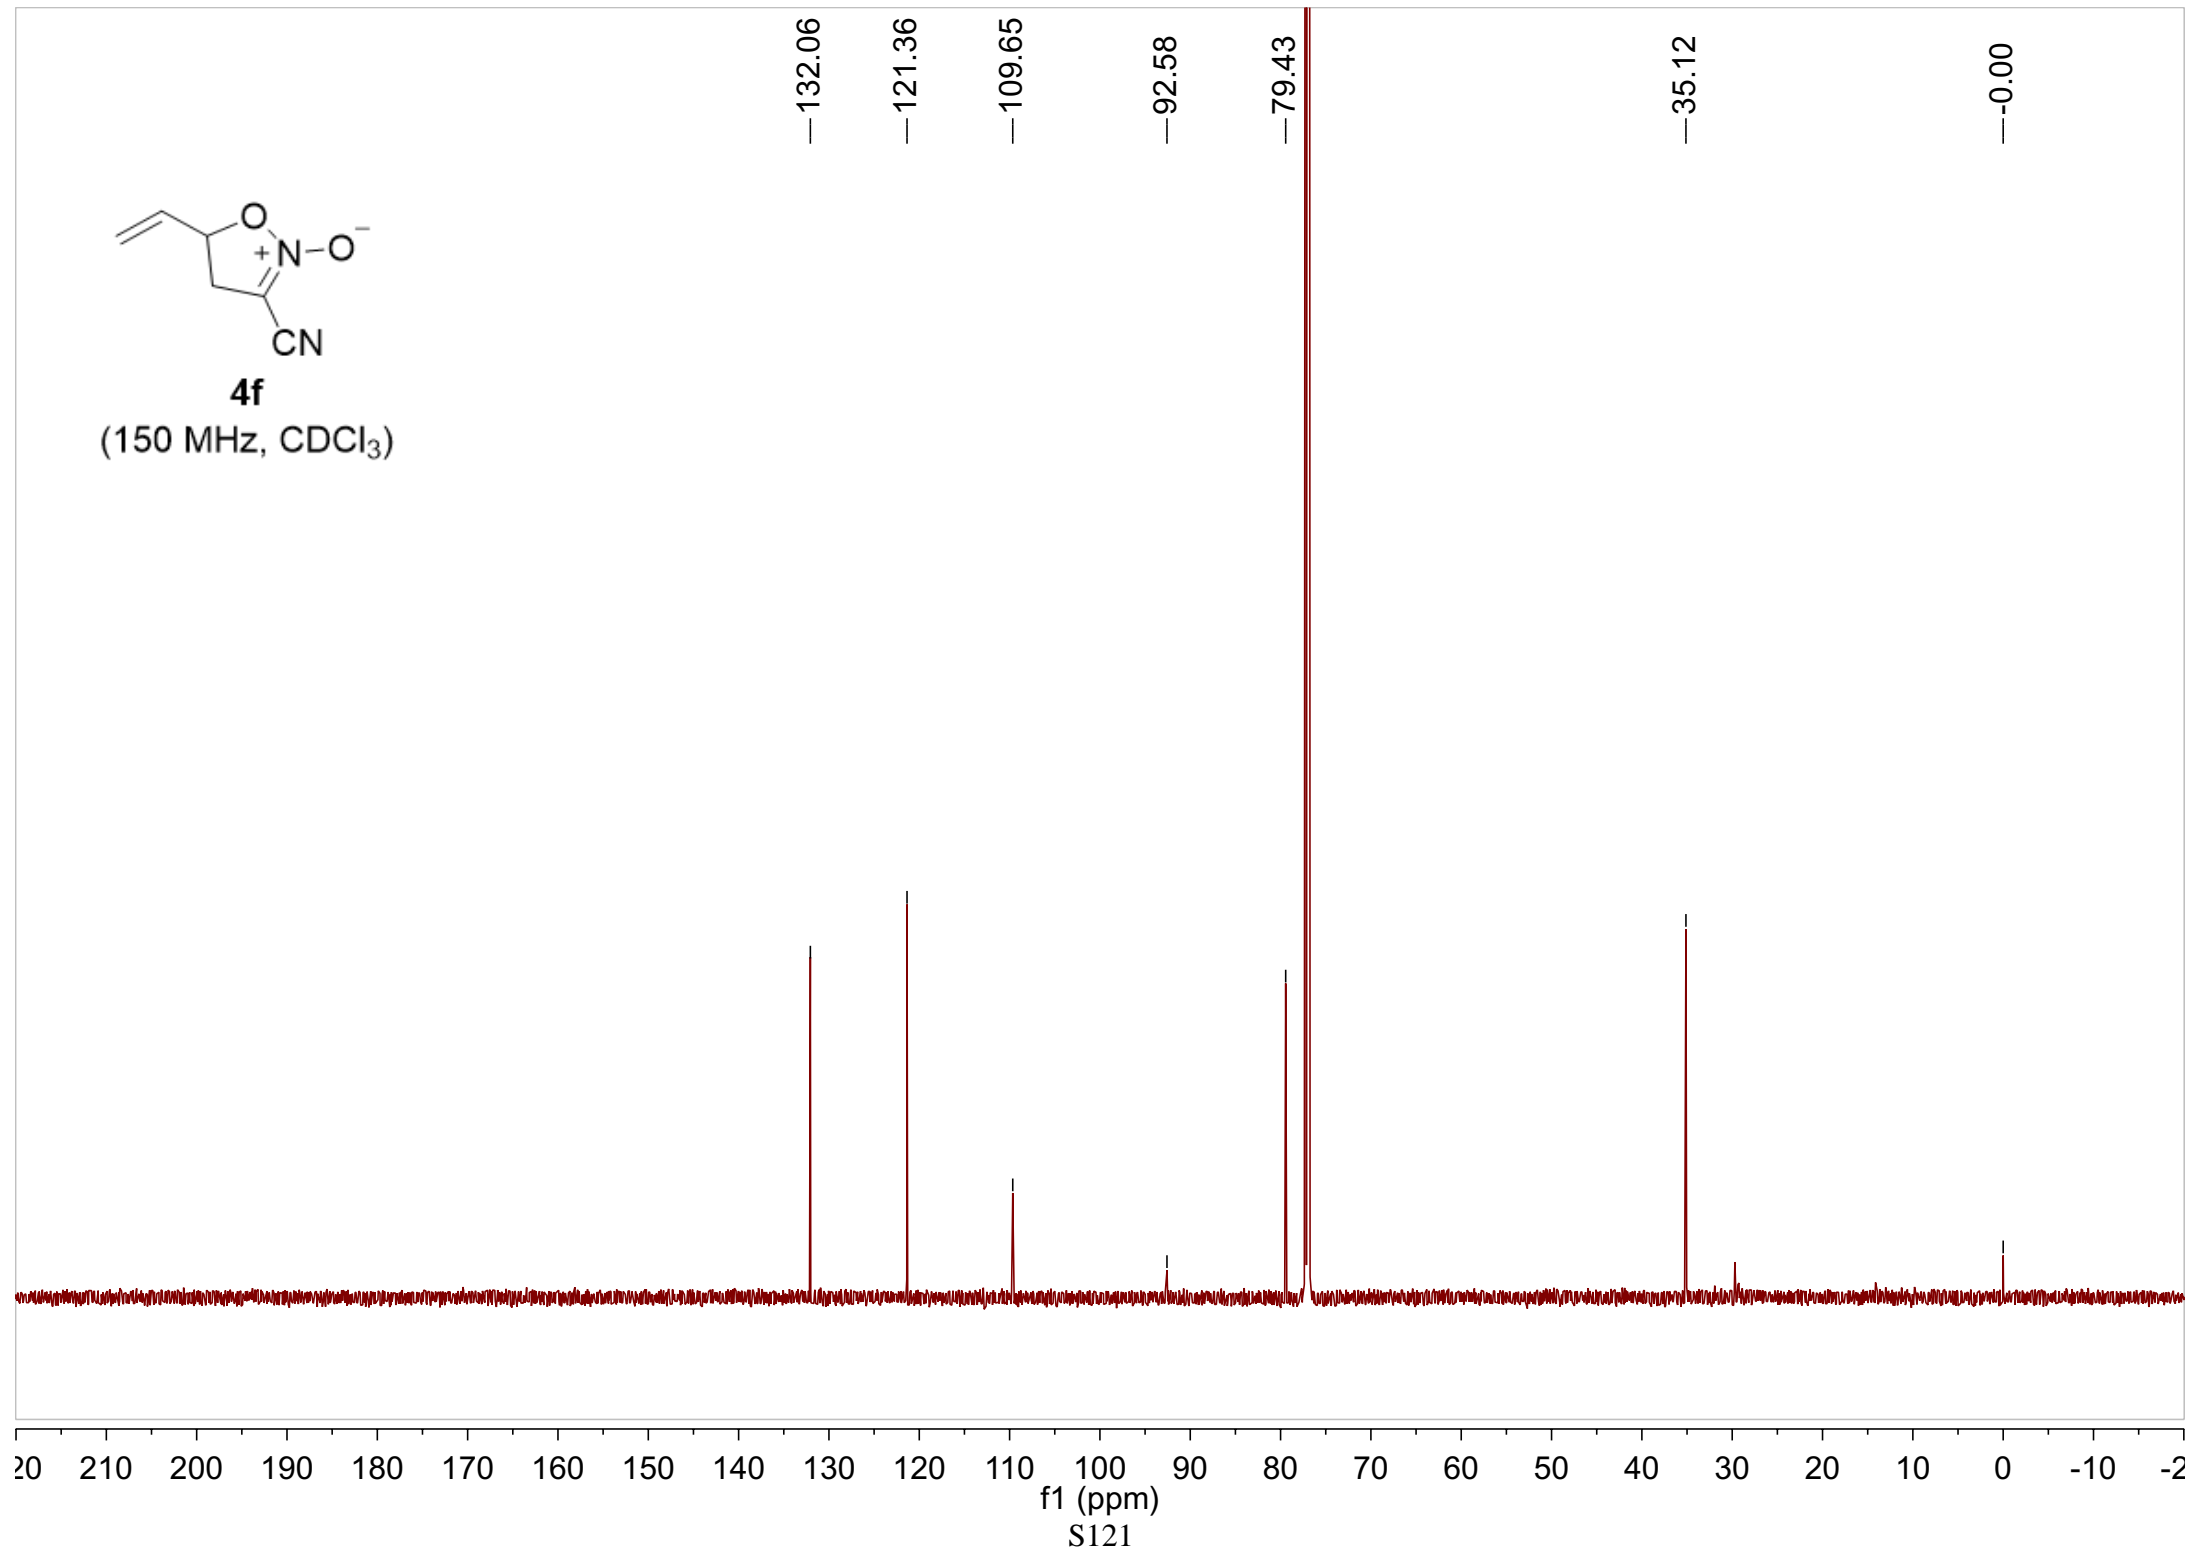

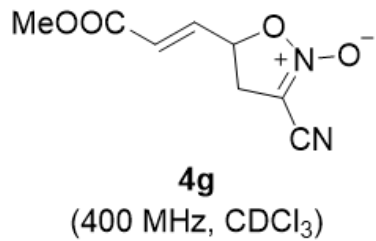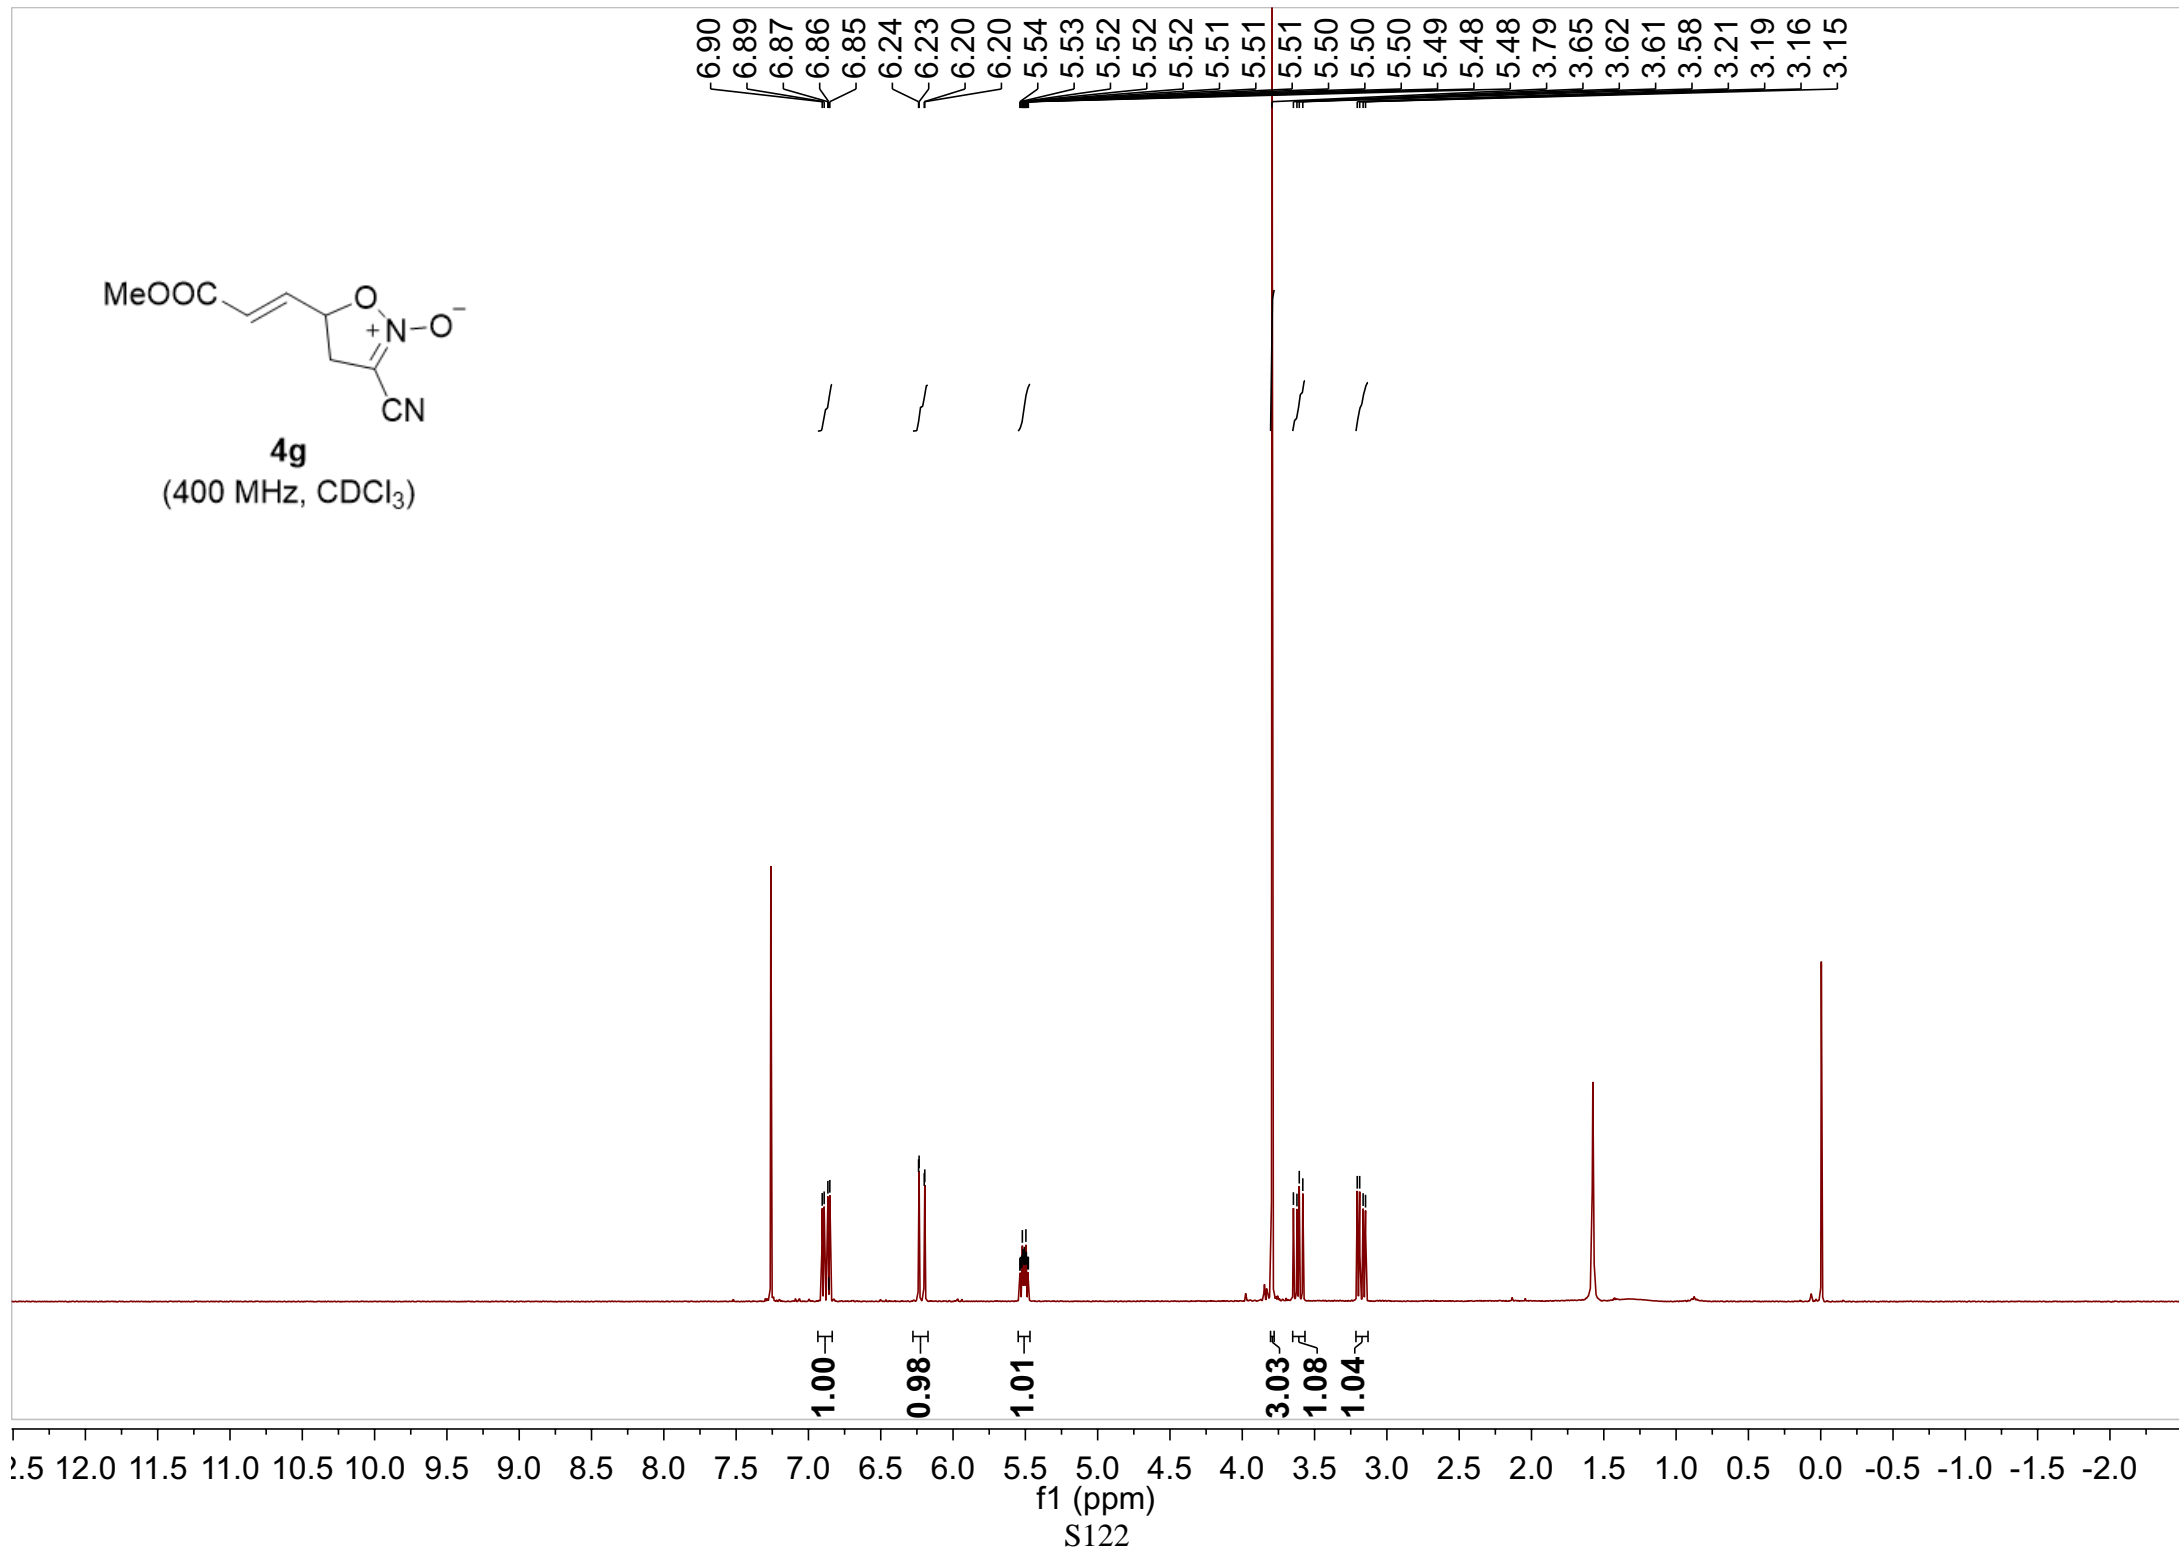

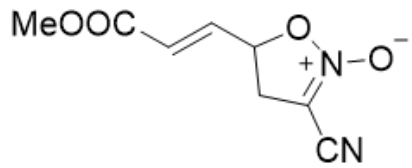

**4g**

(150 MHz, CDCl<sub>3</sub>)

—165.27

—139.69

—124.66

—109.20

—91.84

—76.23

—52.24

—34.88

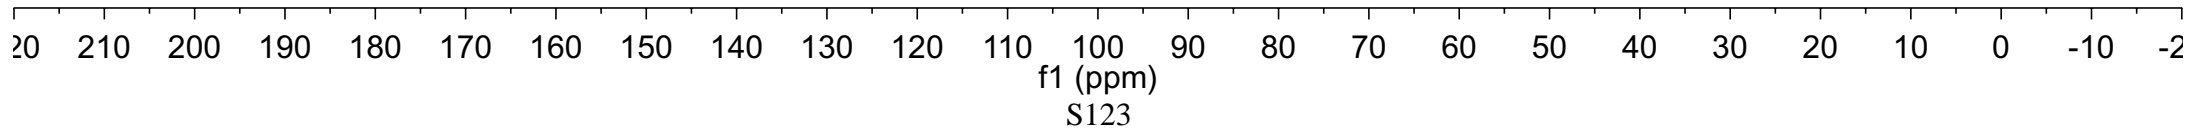

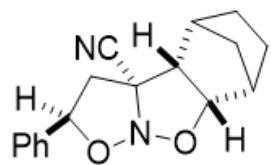

**9a** (major isomer)  
(500 MHz, CDCl<sub>3</sub>)

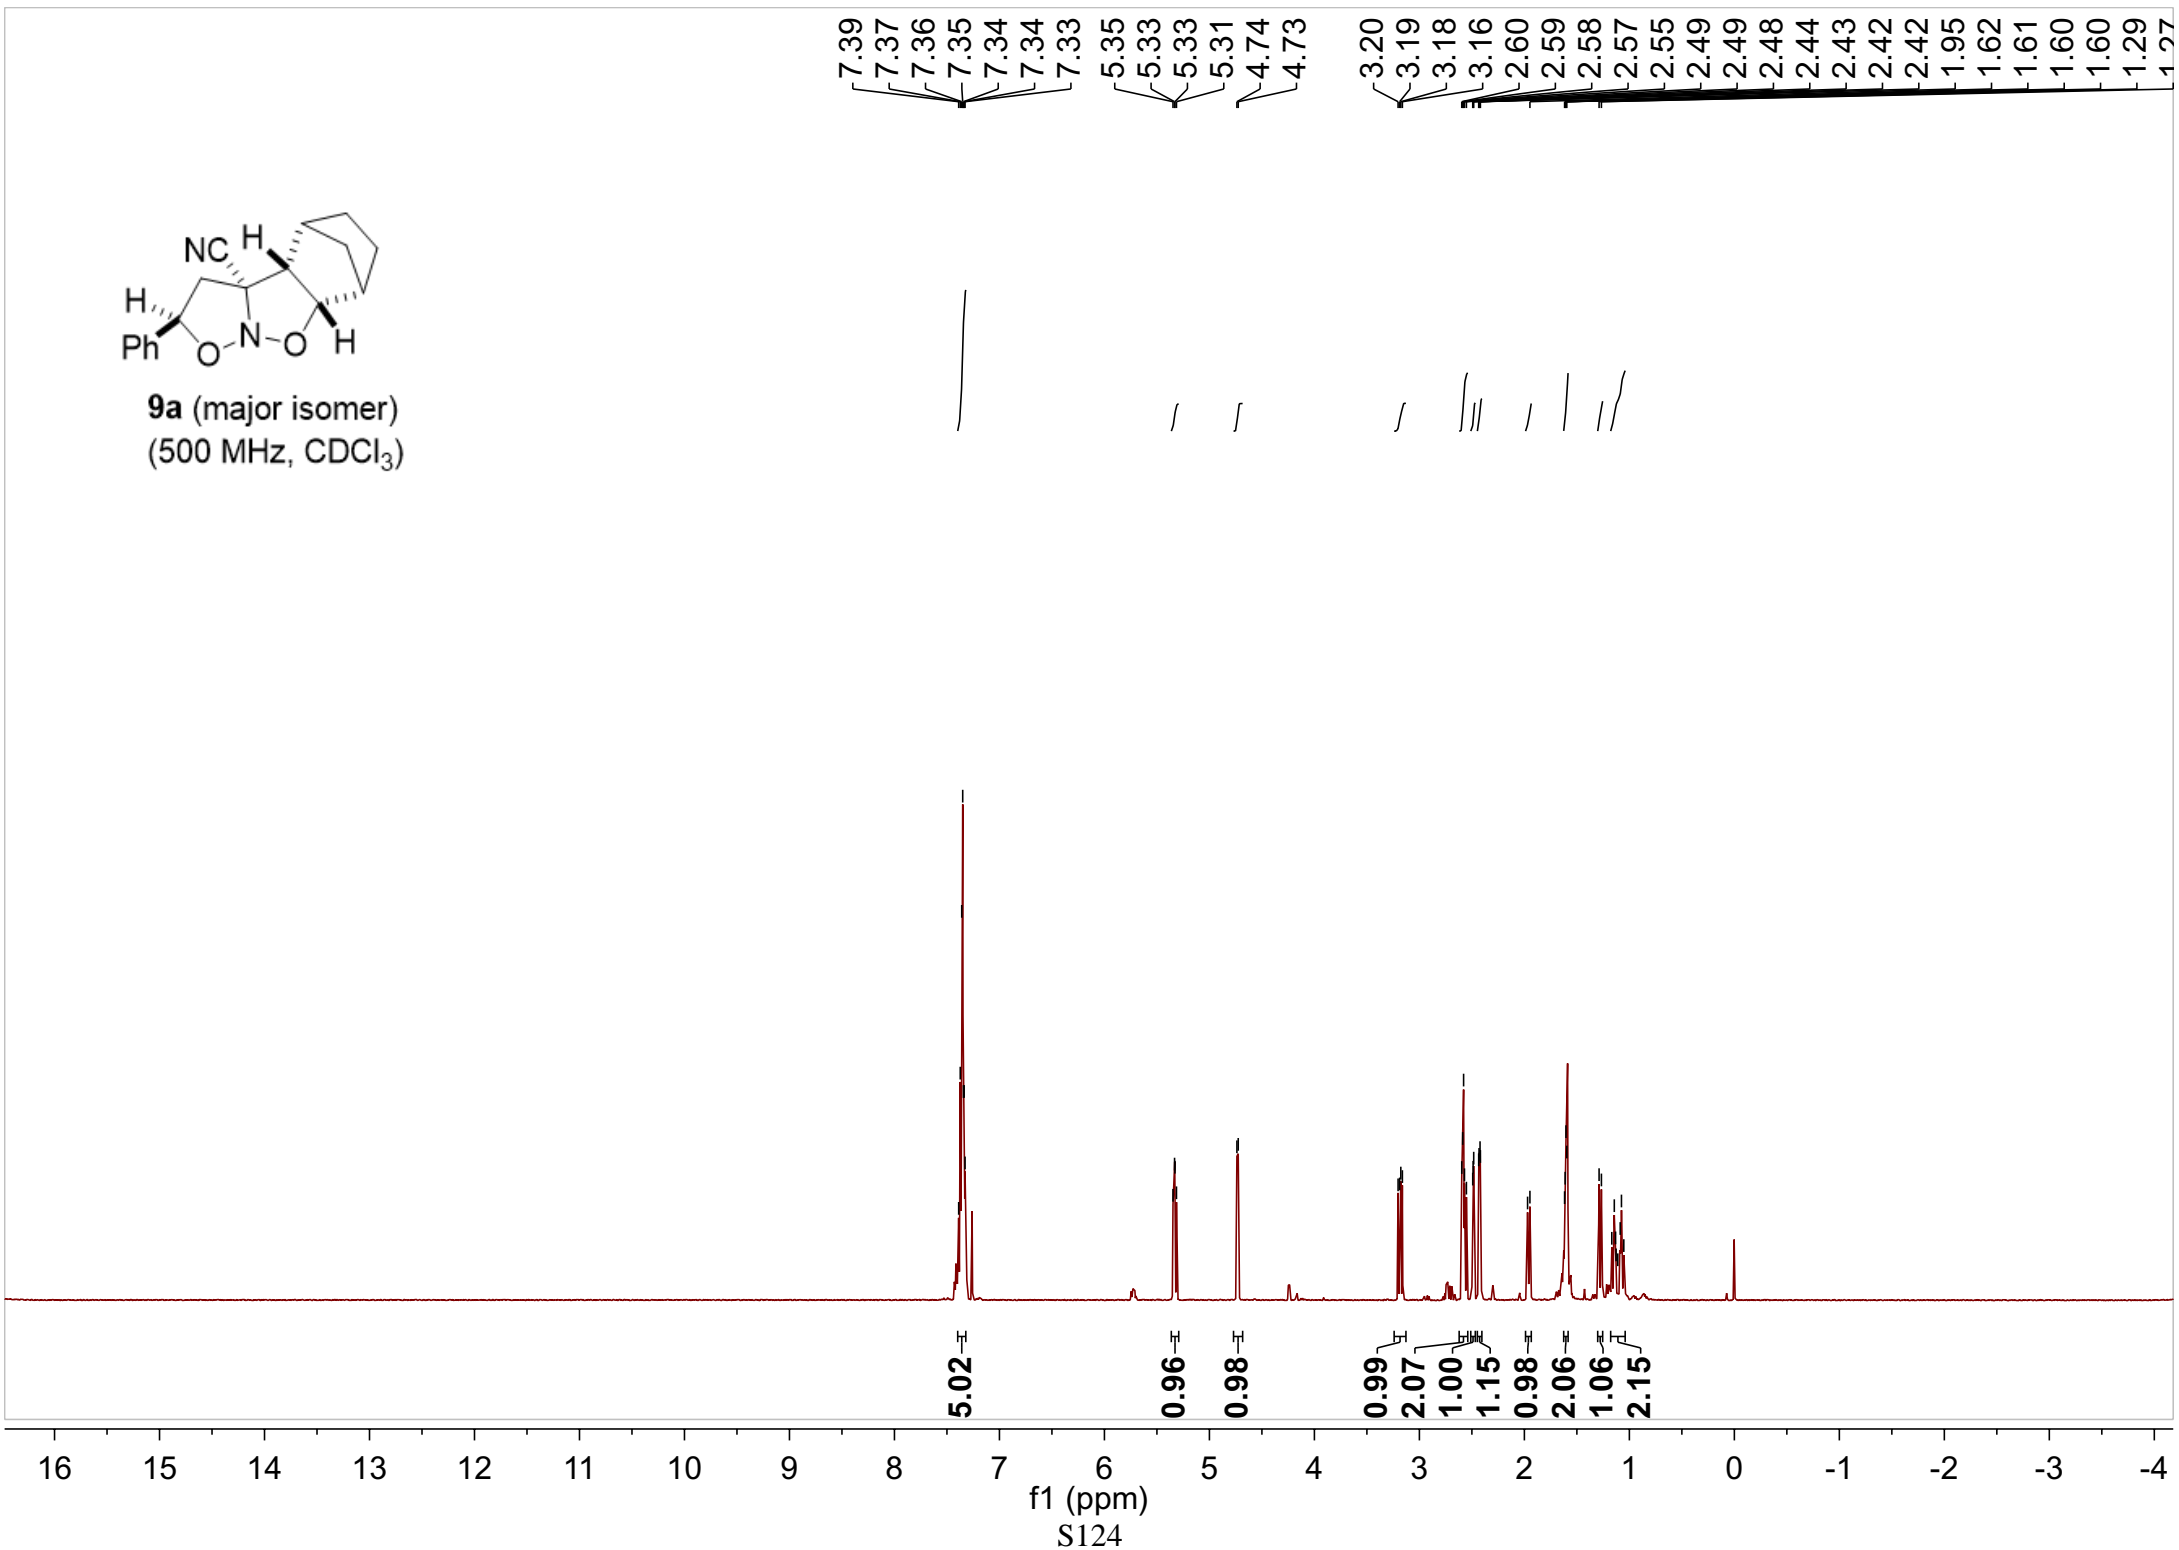

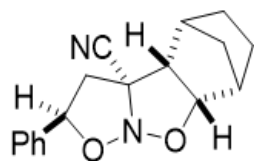

**9a** (major isomer)  
(125 MHz, CDCl<sub>3</sub>)

—137.87  
—128.90  
—128.70  
—126.44  
—116.85  
  
—90.20  
—80.77  
—76.80  
  
—58.19  
—48.22  
—39.95  
—38.99  
—33.49  
—27.90  
—22.88

210 200 190 180 170 160 150 140 130 120 110 100 90 80 70 60 50 40 30 20 10 0 -10

f1 (ppm)

S125

7.38  
7.38  
7.37  
7.36  
7.35  
7.34  
5.49  
5.48  
5.47  
5.46  
4.62  
4.60  
2.89  
2.88  
2.87  
2.85  
2.83  
2.81  
2.80  
2.78  
2.63  
2.62  
2.53  
2.53  
2.52  
2.51  
2.49  
2.48  
1.93  
1.92  
1.92  
1.90  
1.90  
1.90  
1.65  
1.64  
1.63  
1.63  
1.63  
1.62  
1.62  
1.61  
1.61  
1.60  
1.60  
1.30  
1.30  
1.30  
1.28  
1.28  
1.27  
1.20  
1.19  
1.19  
1.18  
1.12  
1.11  
1.10  
1.10

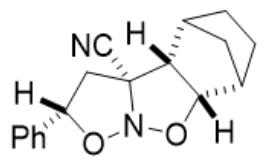

**9a** (minor isomer)  
(500 MHz, CDCl<sub>3</sub>)

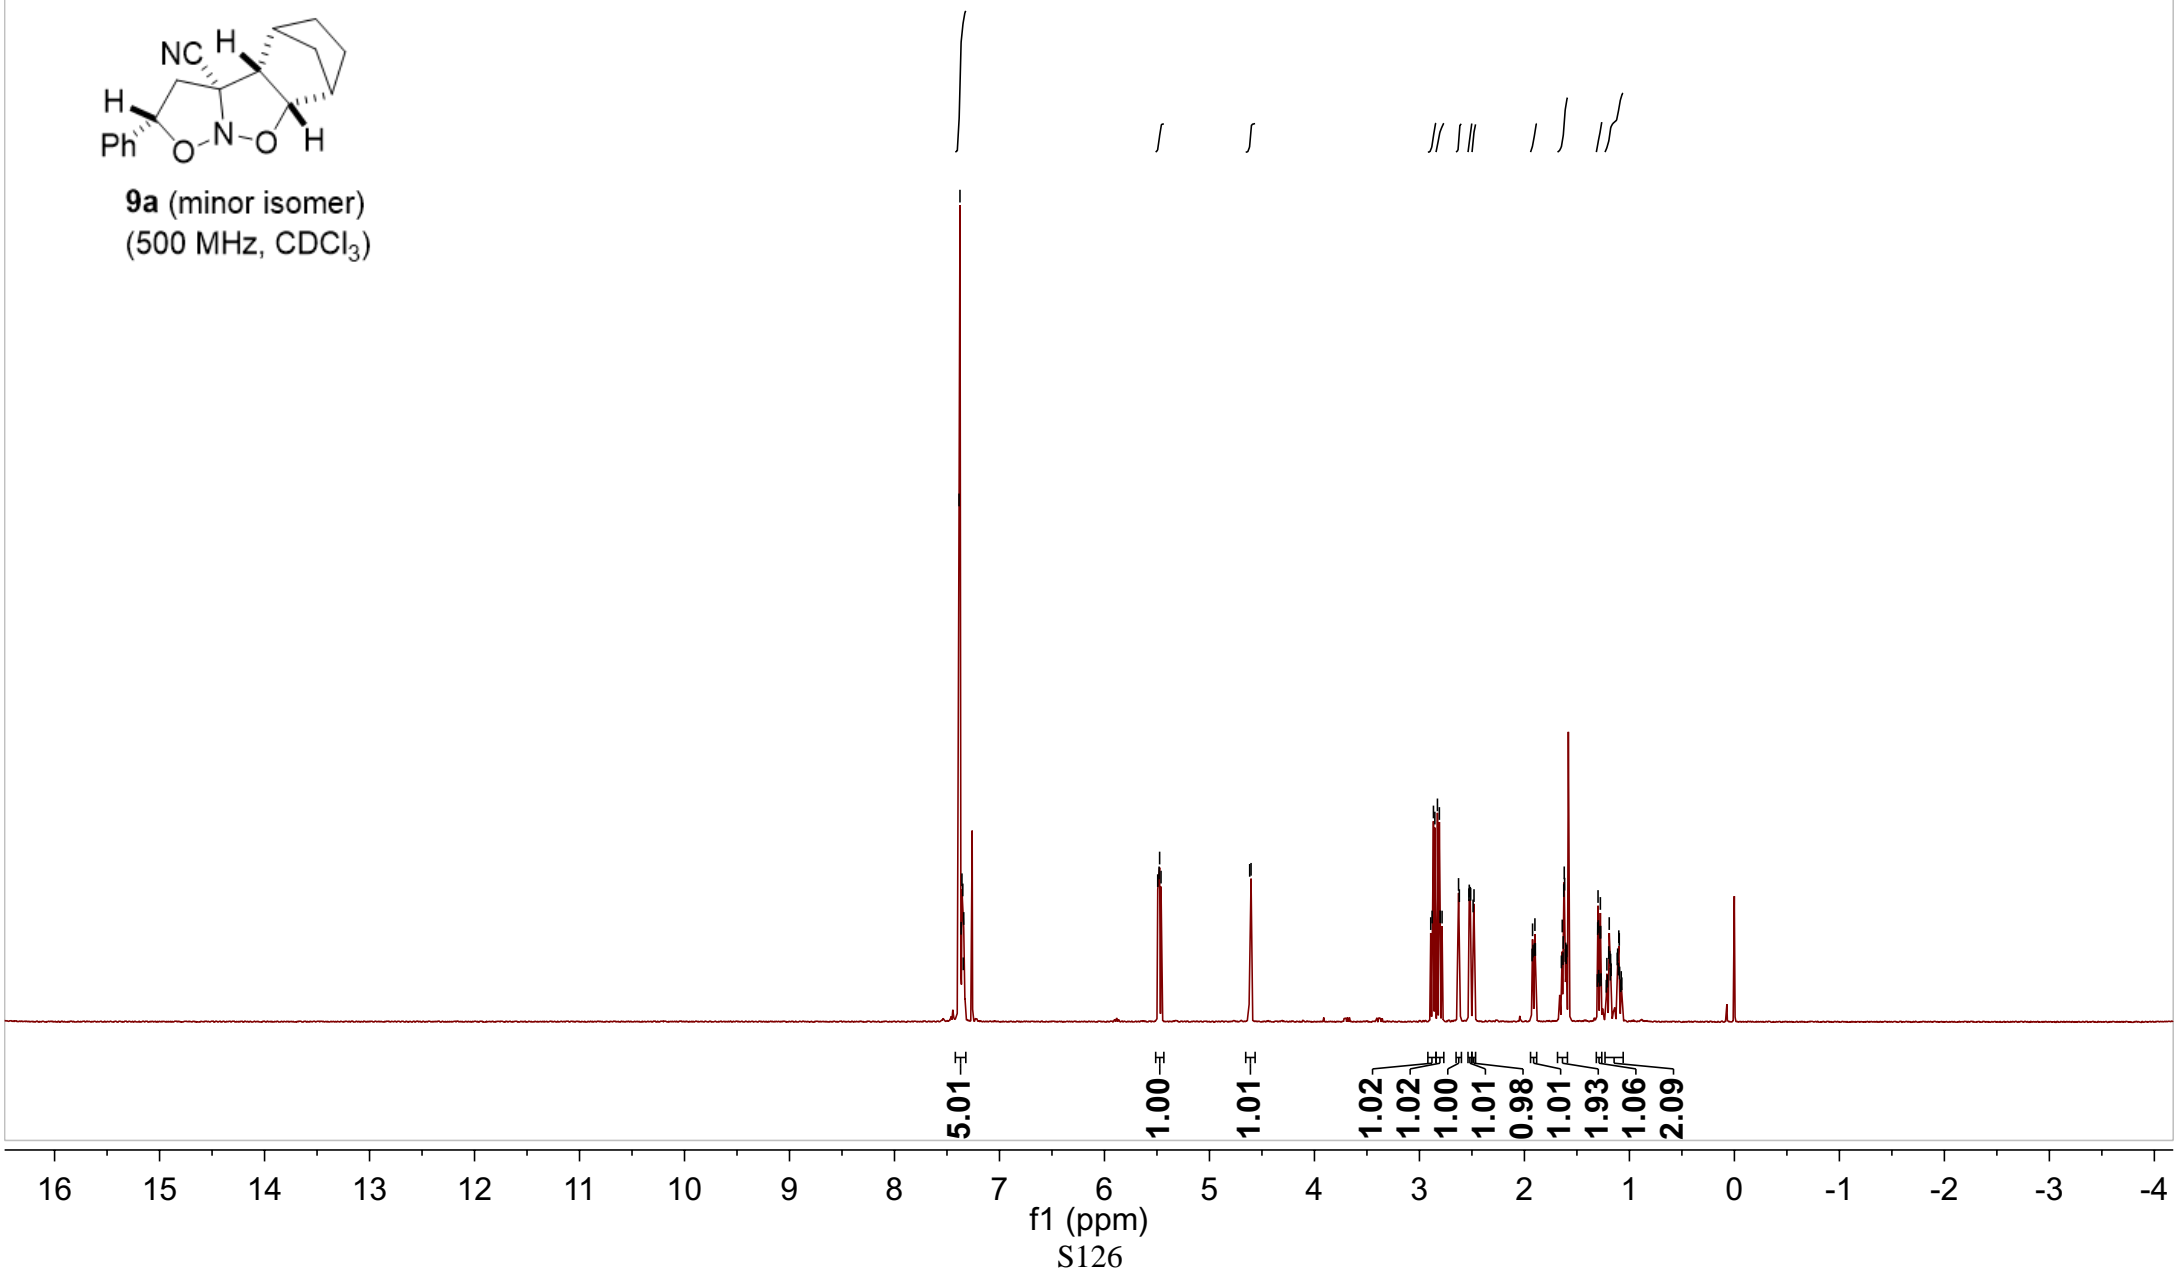

f1 (ppm)  
S126

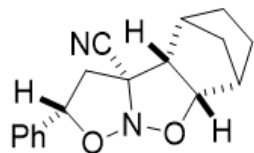

**9a** (minor isomer)  
(125 MHz, CDCl<sub>3</sub>)

137.01  
129.06  
128.98  
126.84  
116.89  
89.83  
82.41  
77.30  
58.34  
48.79  
40.68  
39.37  
33.37  
27.93  
22.76

210 200 190 180 170 160 150 140 130 120 110 100 90 80 70 60 50 40 30 20 10 0 -10

f1 (ppm)  
S127

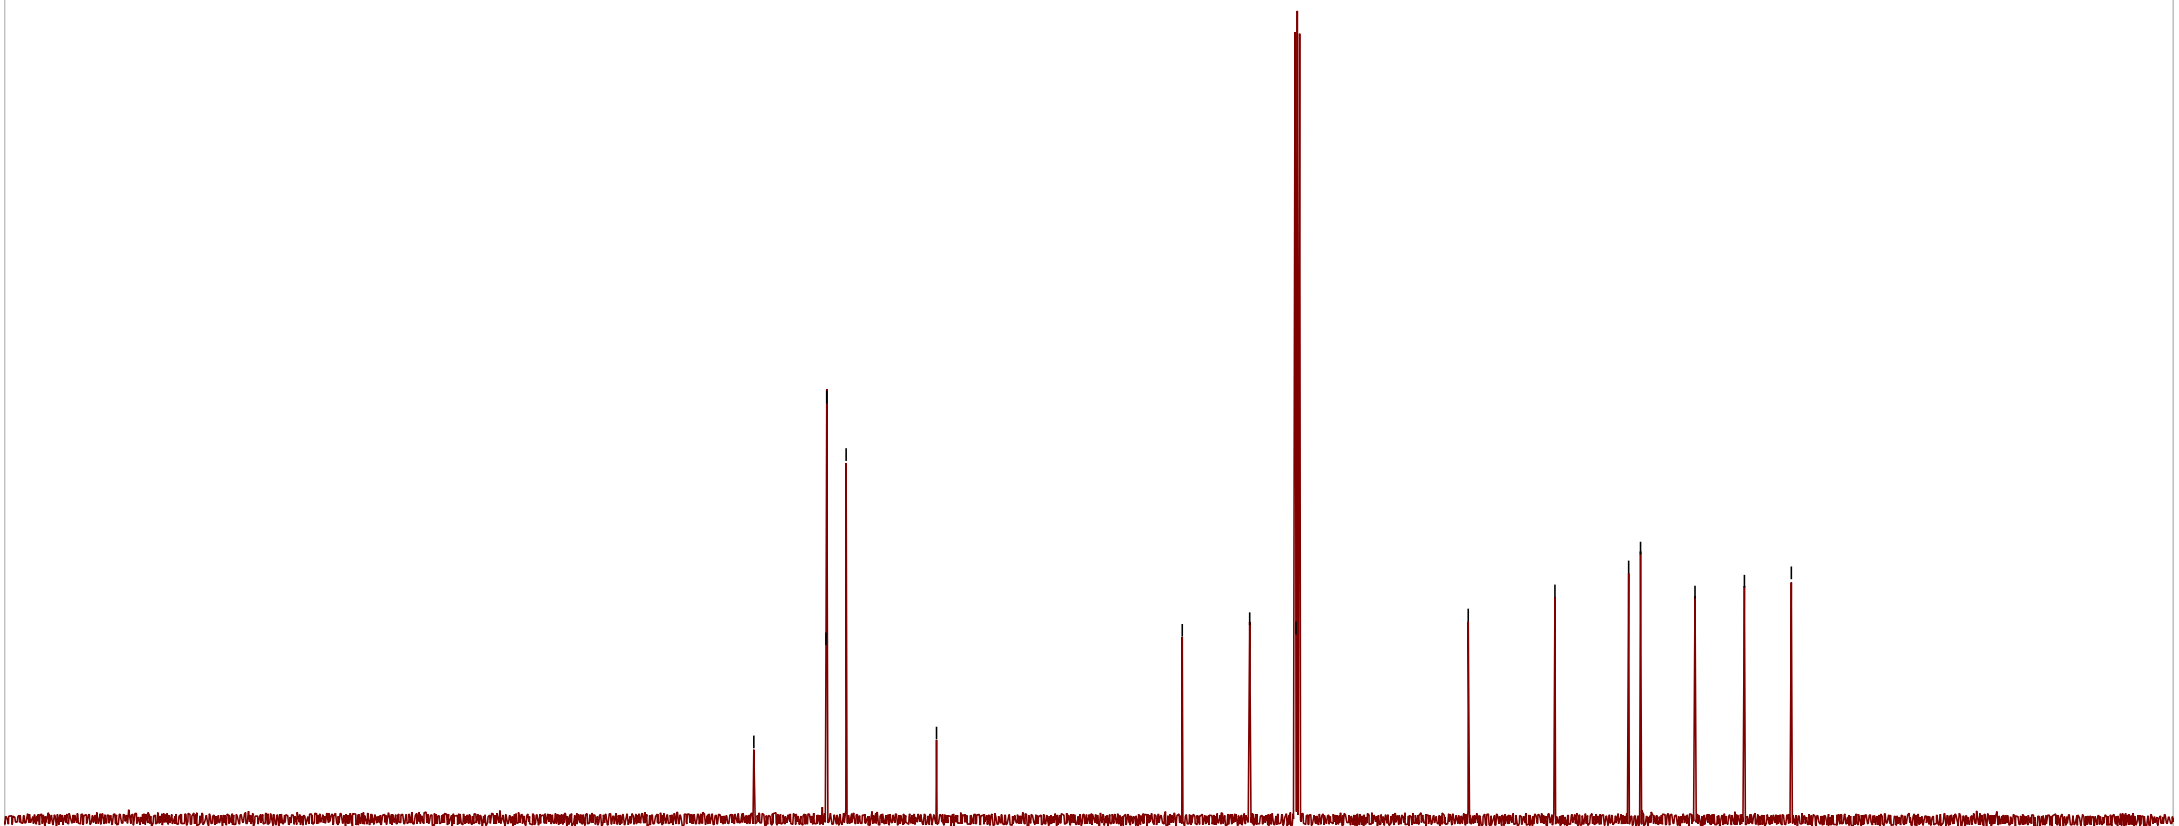

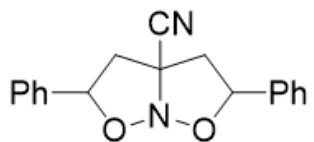

**9b** (major isomer)  
(500 MHz, CDCl<sub>3</sub>)

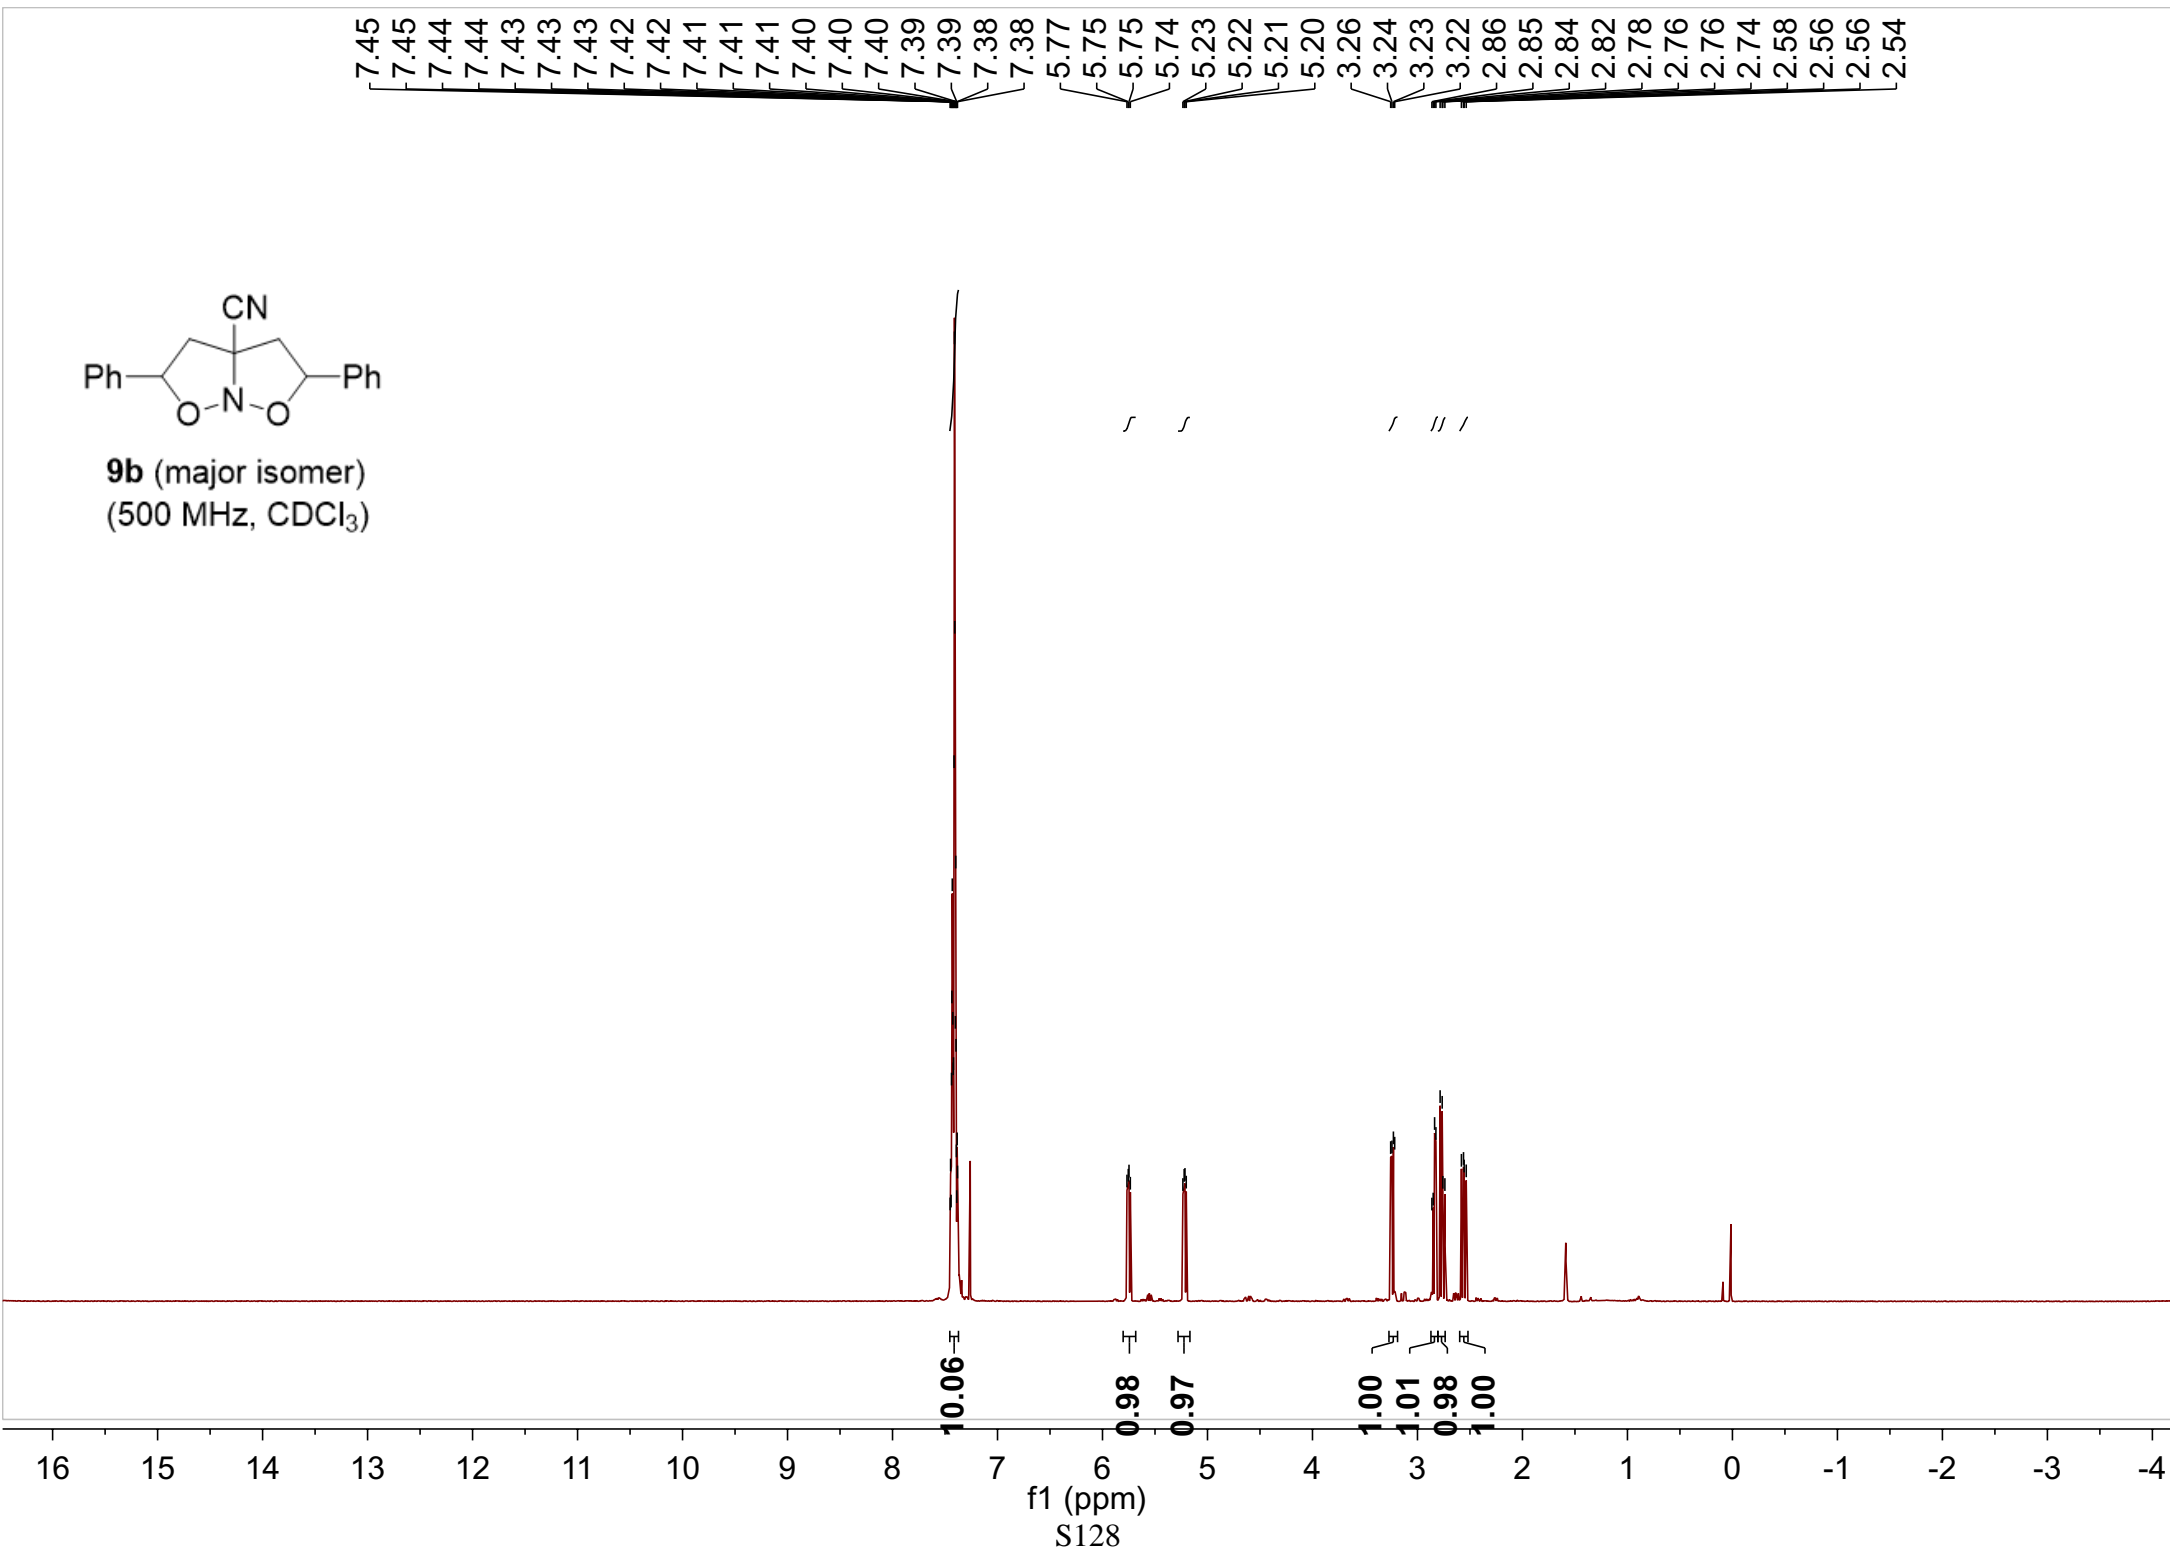



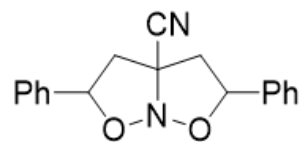

**9b** (major isomer)  
(125 MHz, CDCl<sub>3</sub>)

136.15  
135.38  
129.35  
129.07  
129.01  
127.20  
126.29  
119.23

84.07  
77.58  
72.82

47.79  
47.35

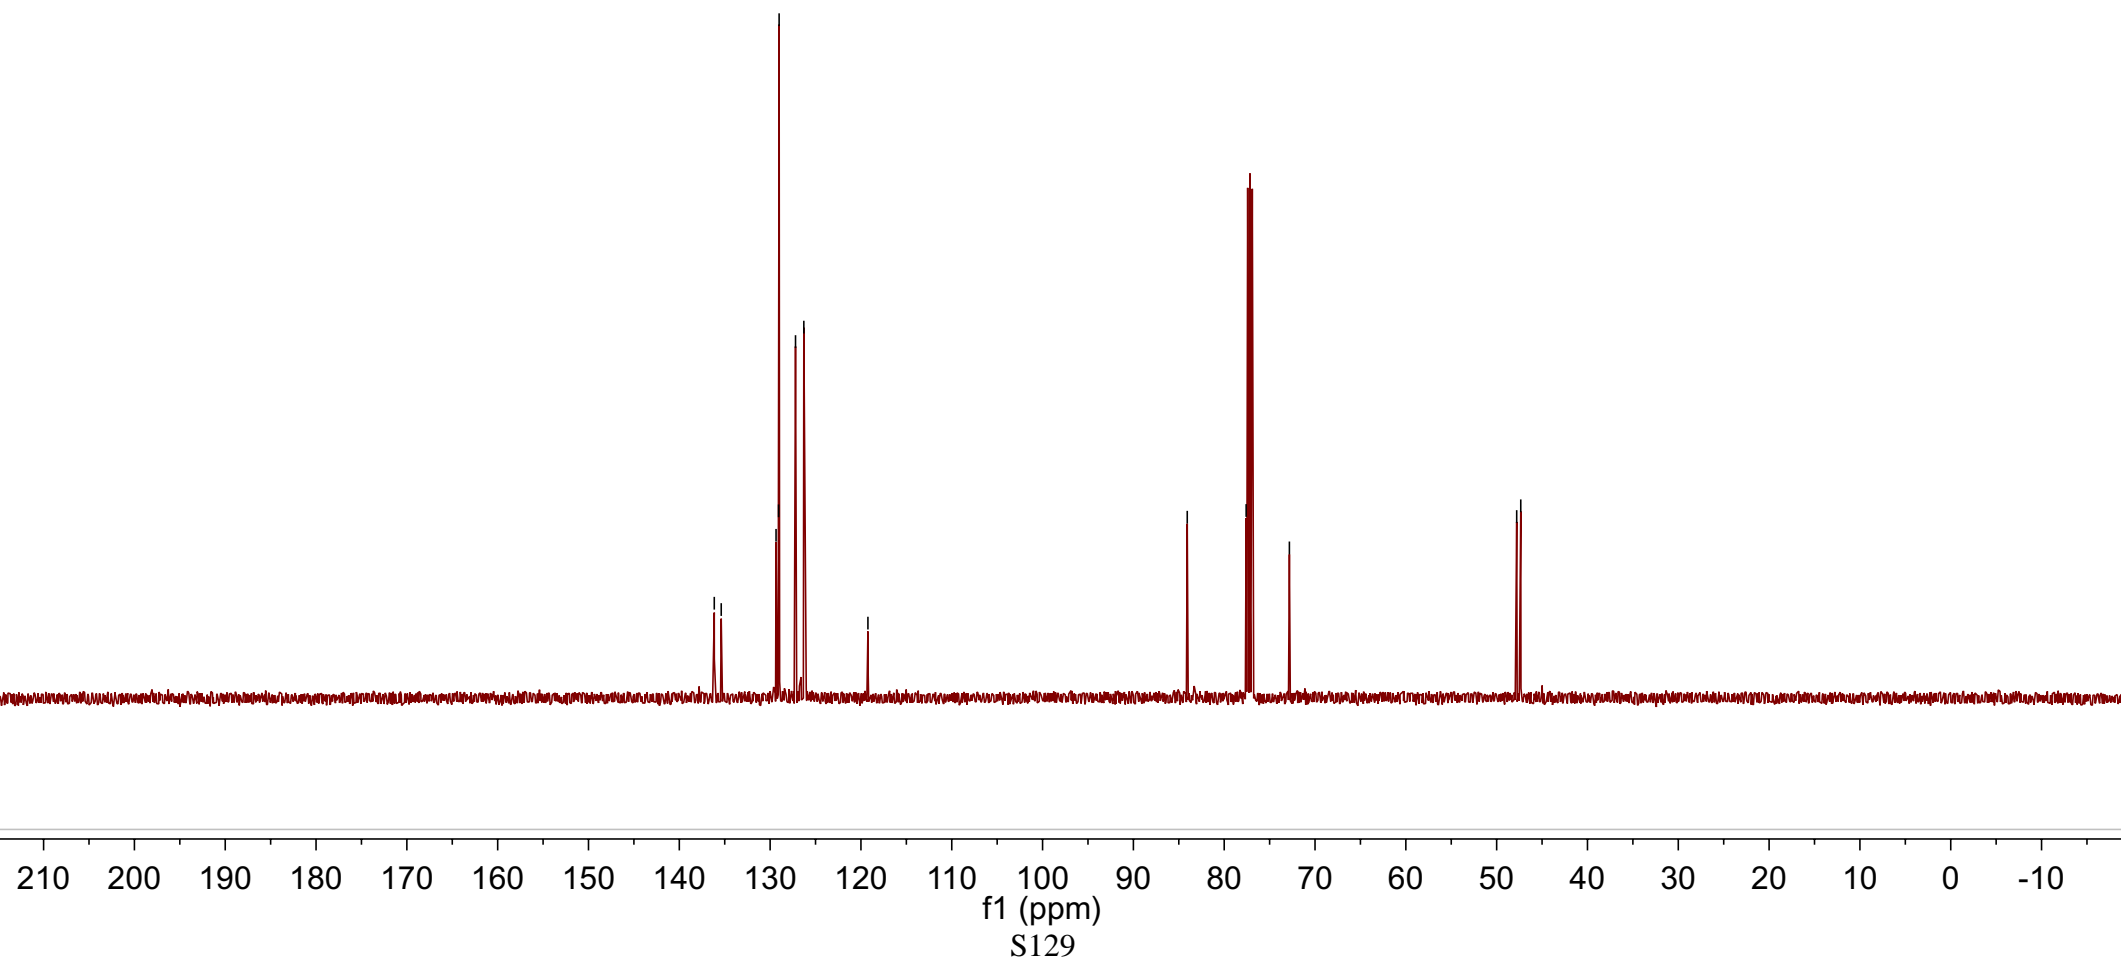

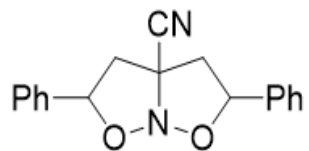

**9b** (minor isomer)  
(500 MHz, CDCl<sub>3</sub>)

7.44 7.44 7.43 7.42 7.42 7.42 7.40 7.39 7.39 7.38 7.37 5.63 5.61 5.61 5.60 3.02 3.01 3.00 2.98 2.92 2.91 2.90 2.88

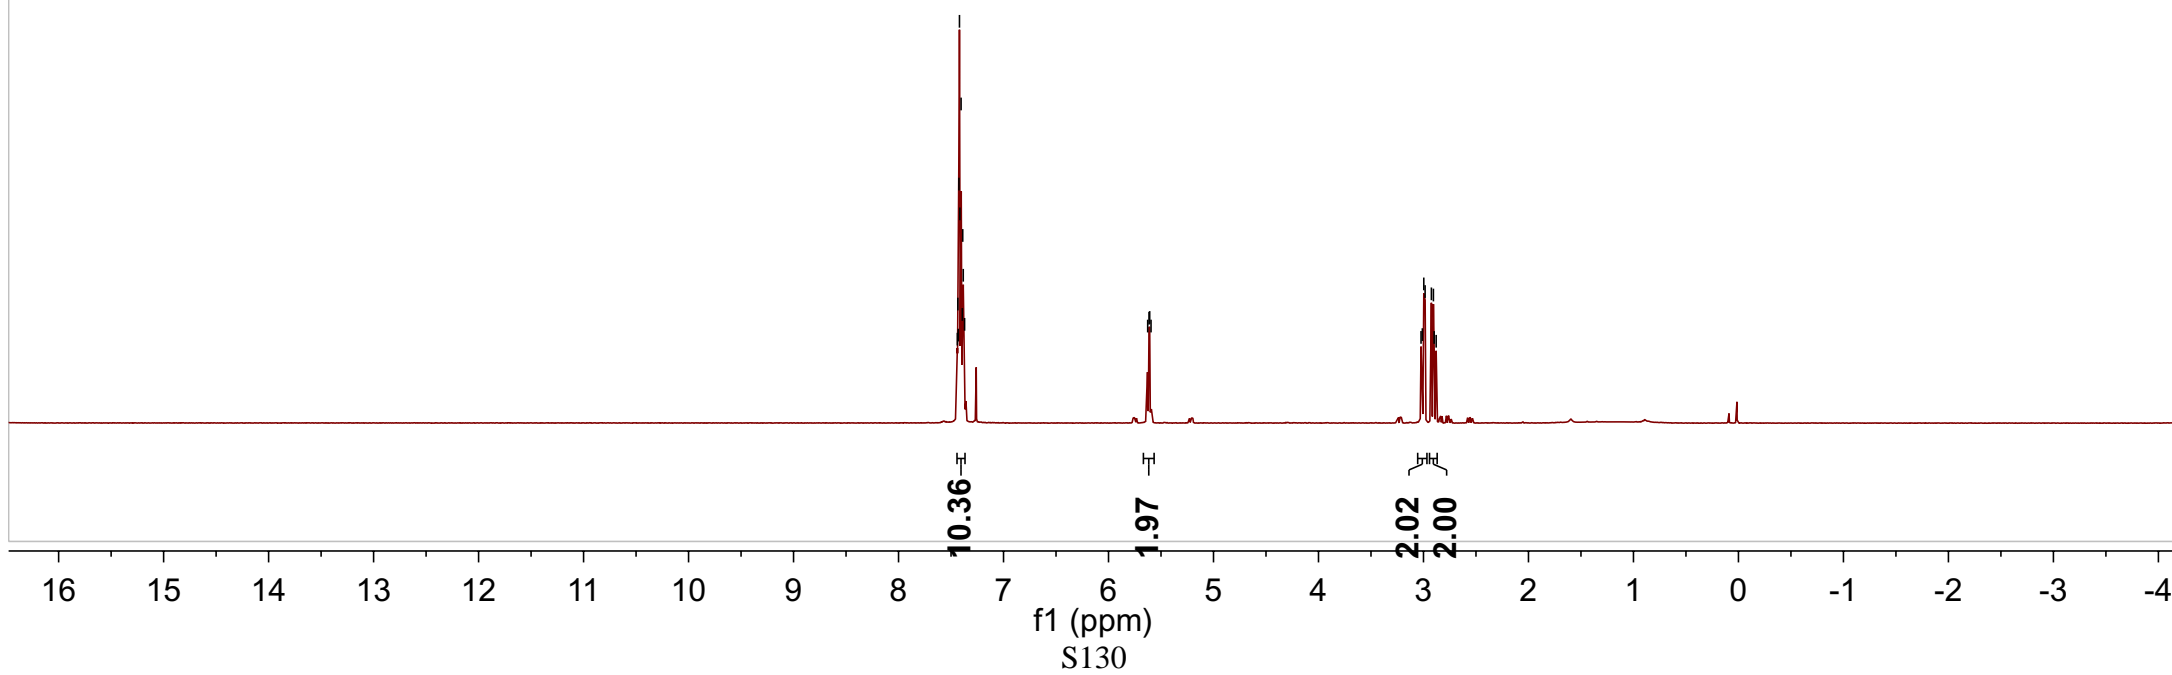

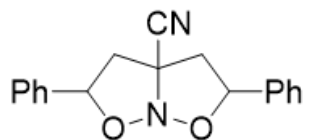

**9b** (minor isomer)  
(125 MHz, CDCl<sub>3</sub>)

~136.63  
~129.20  
~129.02  
~126.71  
~118.74  
—83.93  
—73.50  
—47.72

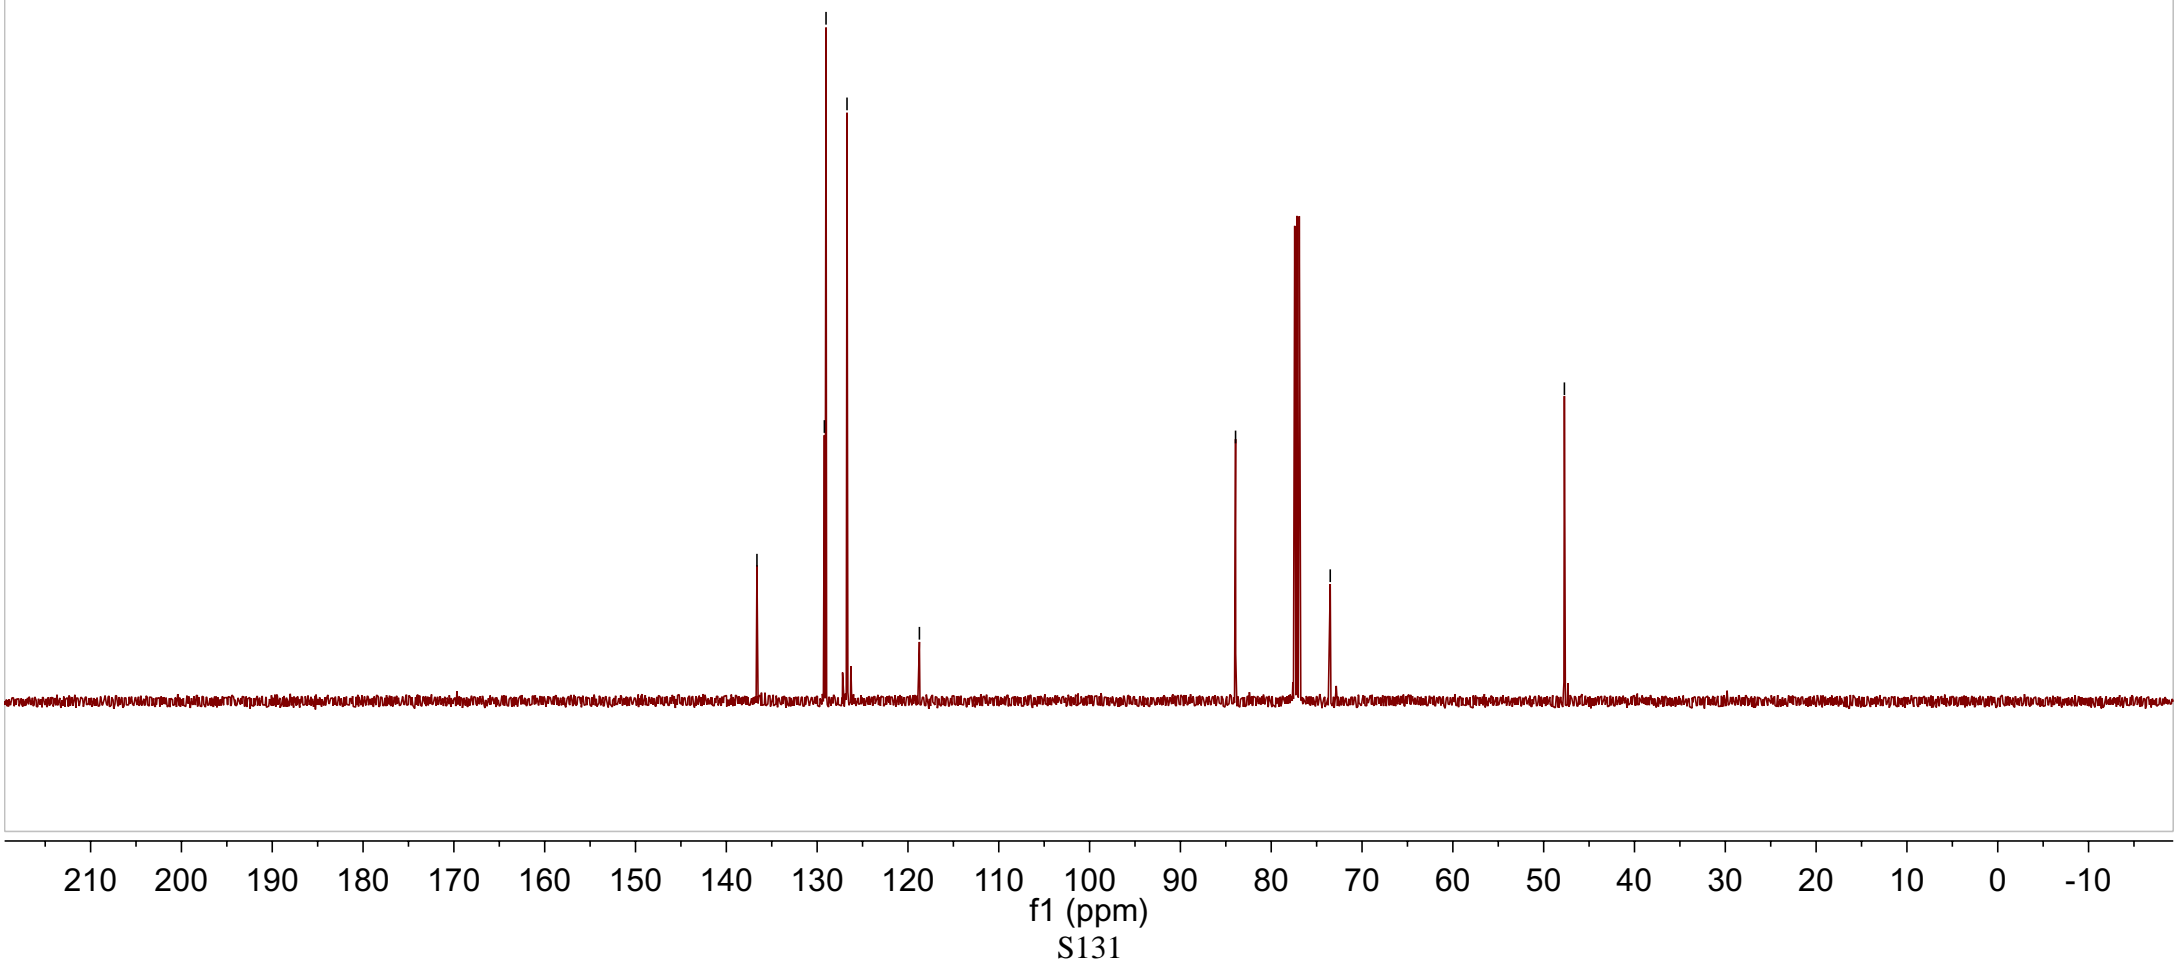

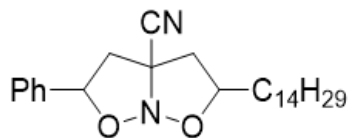

**9c** (major isomer)  
(400 MHz, CDCl<sub>3</sub>)

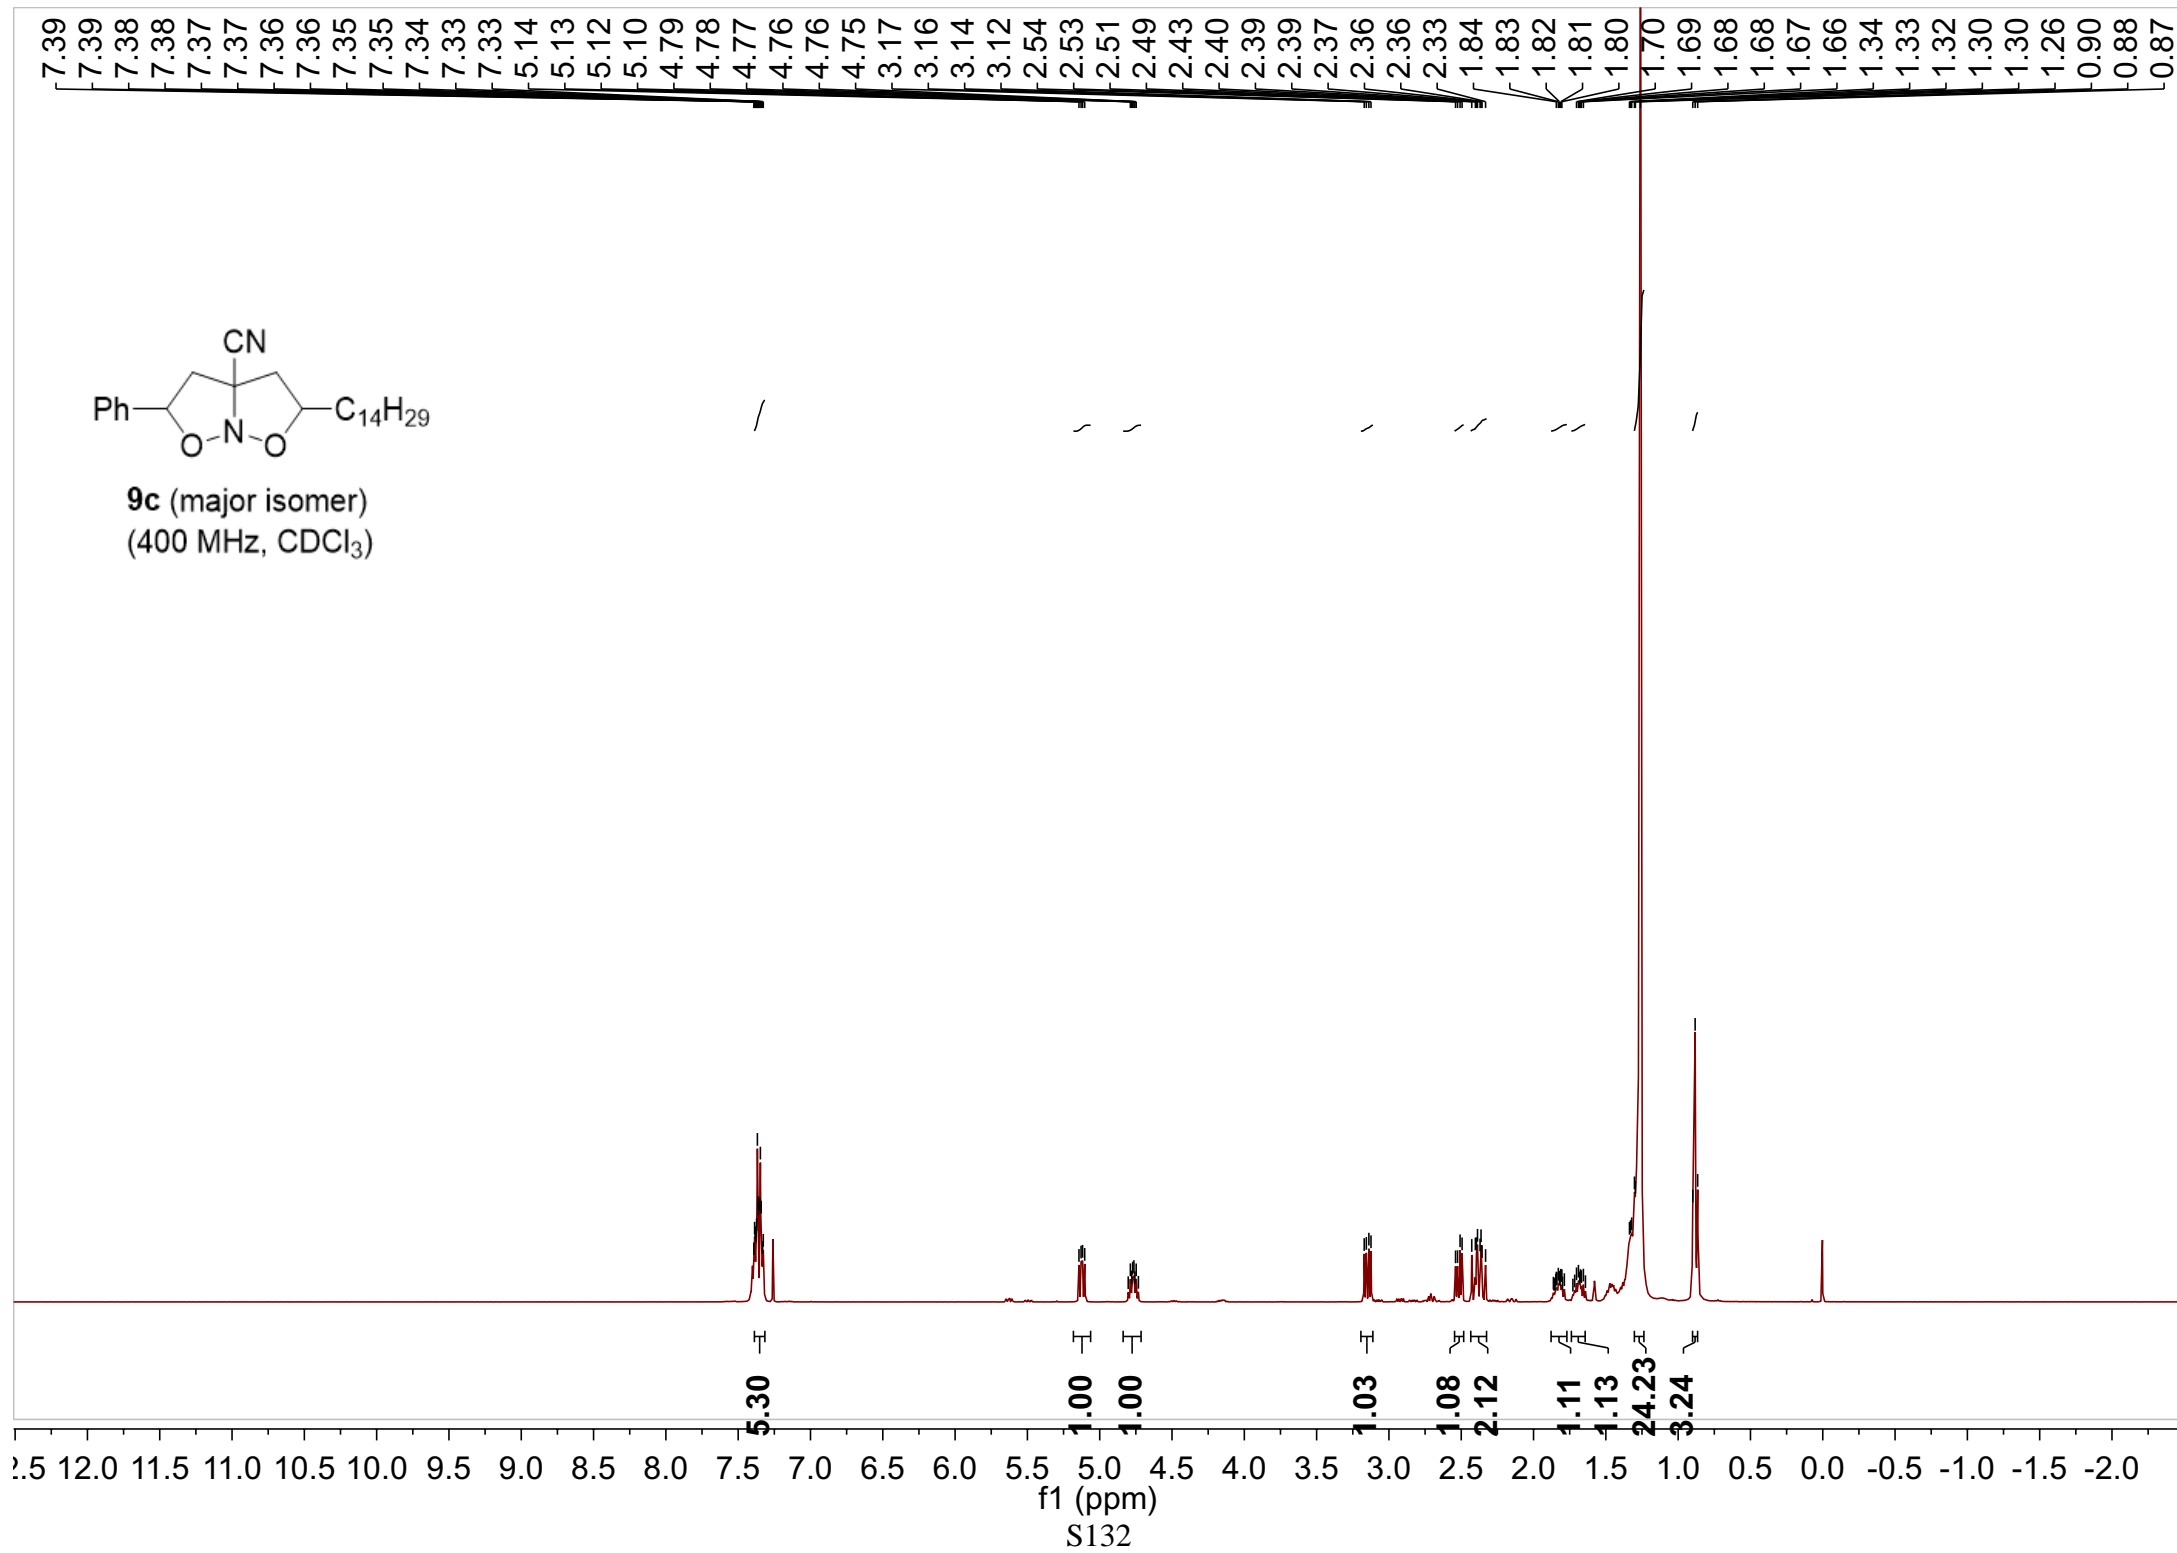

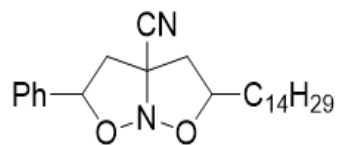

**9c** (major isomer)  
(125 MHz, CDCl<sub>3</sub>)

136.26  
128.97  
128.95  
126.24  
119.51

82.85  
77.31  
72.22  
47.63  
45.73  
32.35  
32.05  
29.82  
29.80  
29.78  
29.75  
29.63  
29.61  
29.49  
26.19  
22.82  
14.25

210 200 190 180 170 160 150 140 130 120 110 100 90 80 70 60 50 40 30 20 10 0 -10

f1 (ppm)  
S133

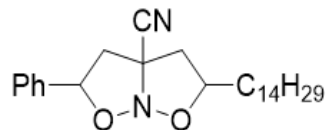

**9c** (minor isomer)  
(500 MHz, CDCl<sub>3</sub>)

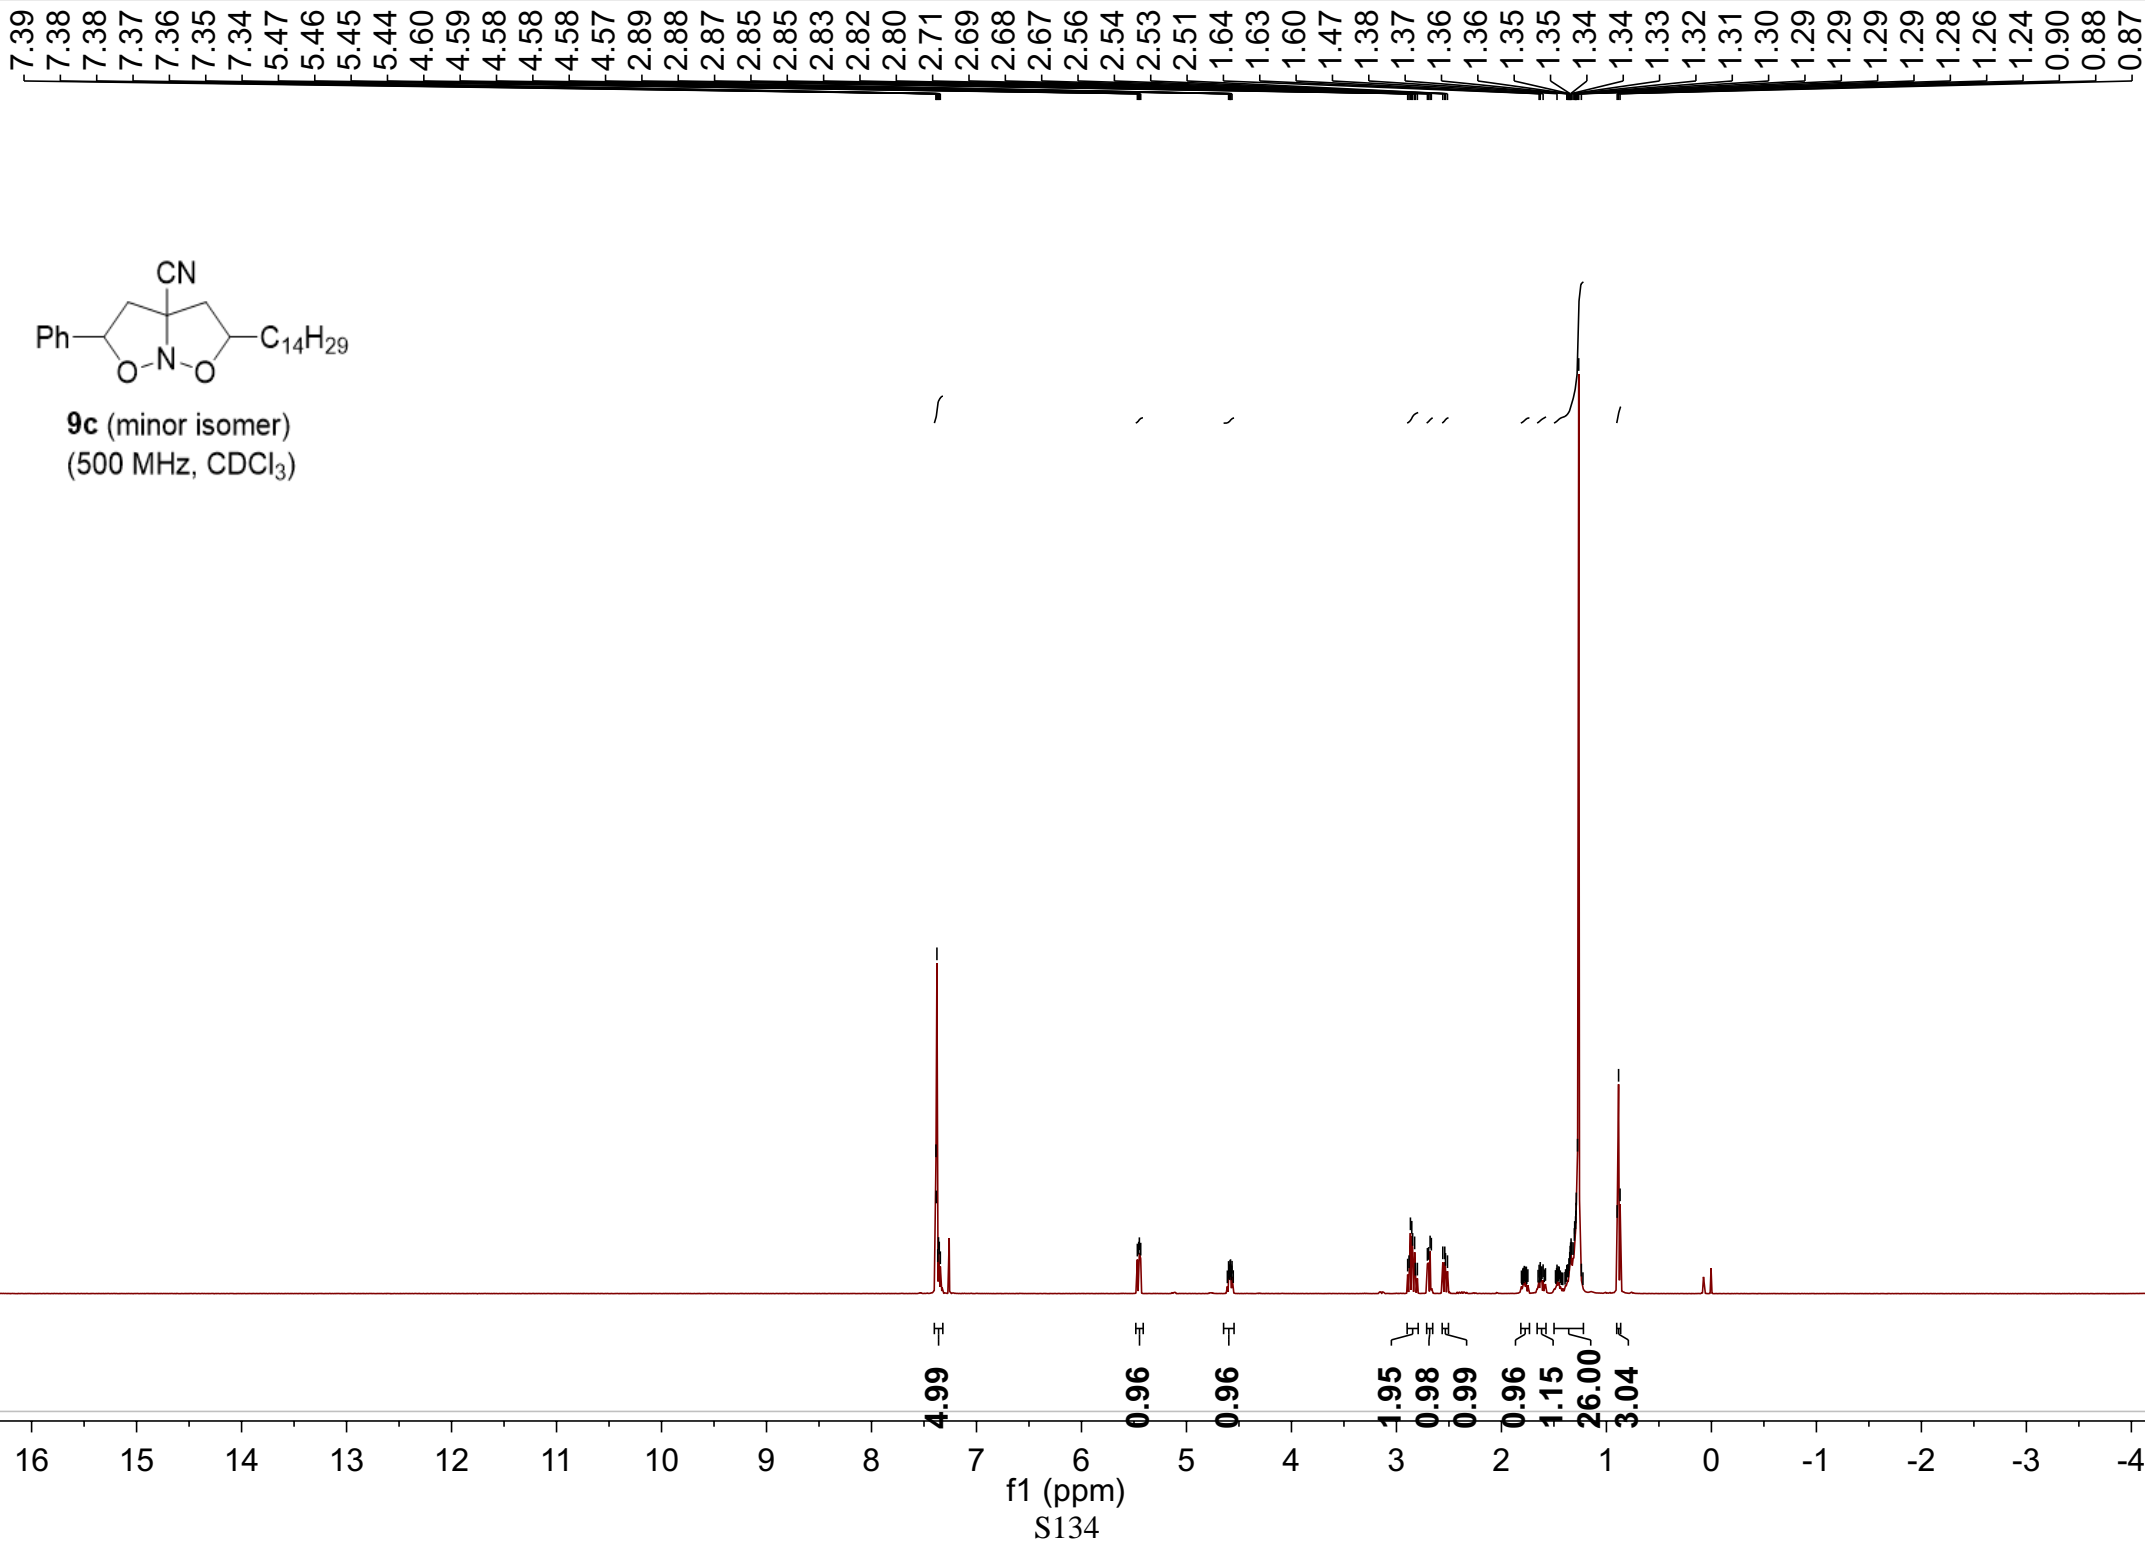

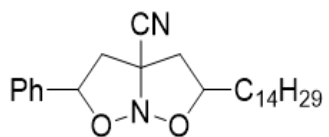

**9c** (minor isomer)  
(125 MHz, CDCl<sub>3</sub>)

— 136.71  
— 129.11  
— 128.96  
— 126.65  
— 119.07

— 83.73  
— 82.72  
— 72.90

— 48.14  
— 45.50  
— 33.75  
— 32.05  
— 29.81  
— 29.80  
— 29.78  
— 29.74  
— 29.63  
— 29.57  
— 29.55  
— 29.48  
— 26.07  
— 22.81  
— 14.24

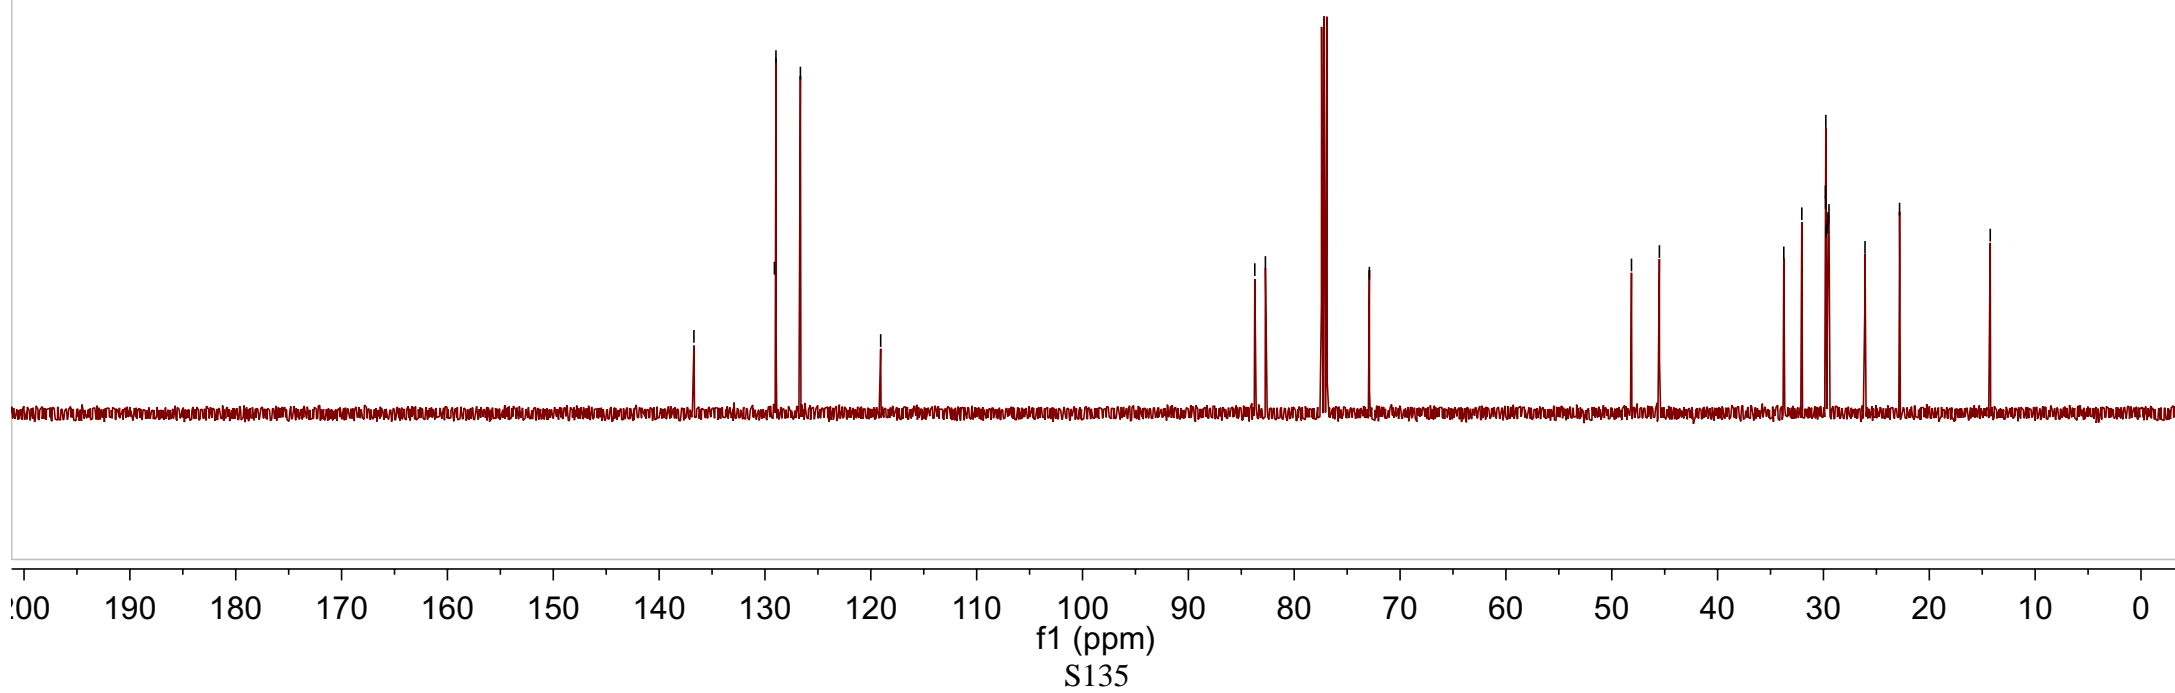

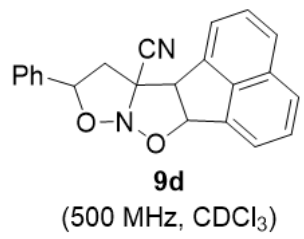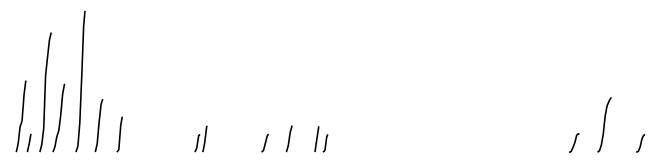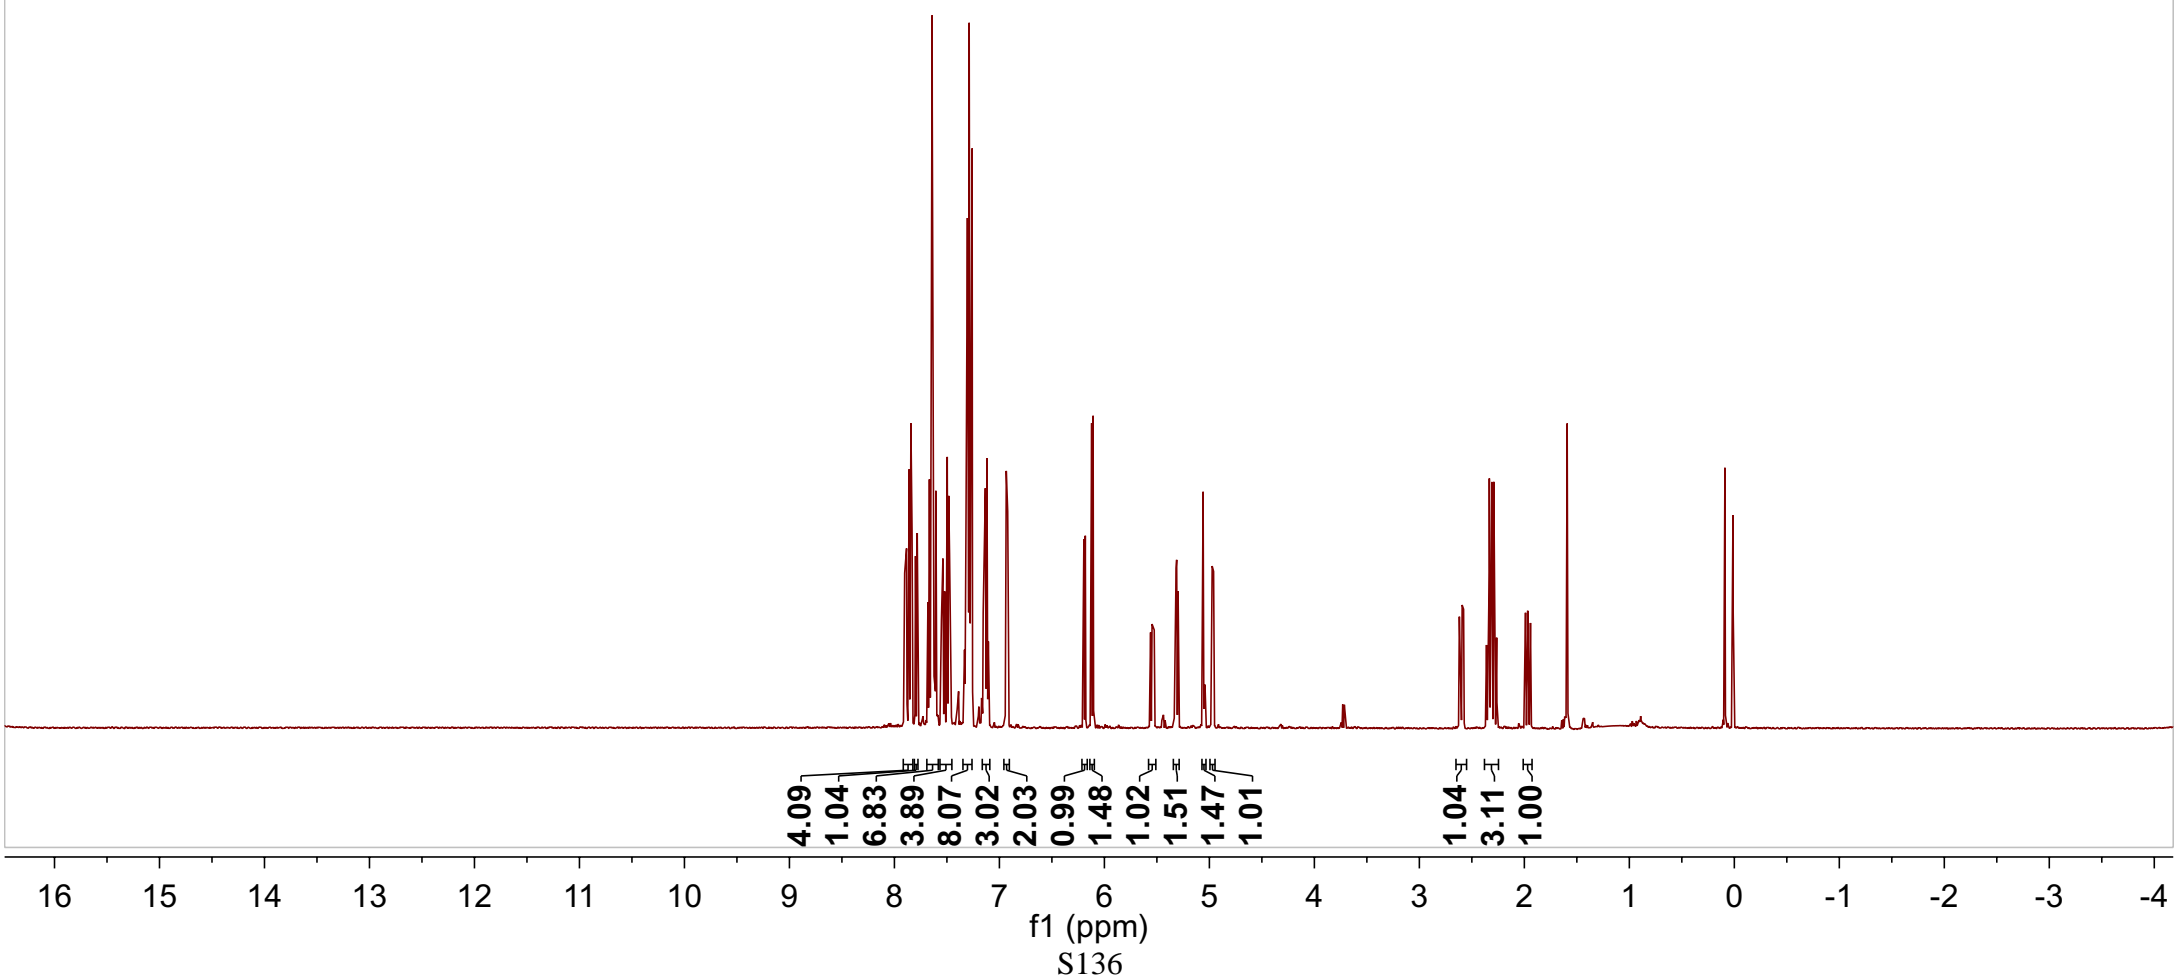



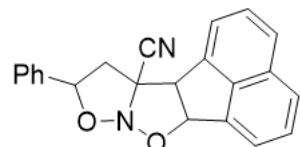

**9d**

(125 MHz, CDCl<sub>3</sub>)

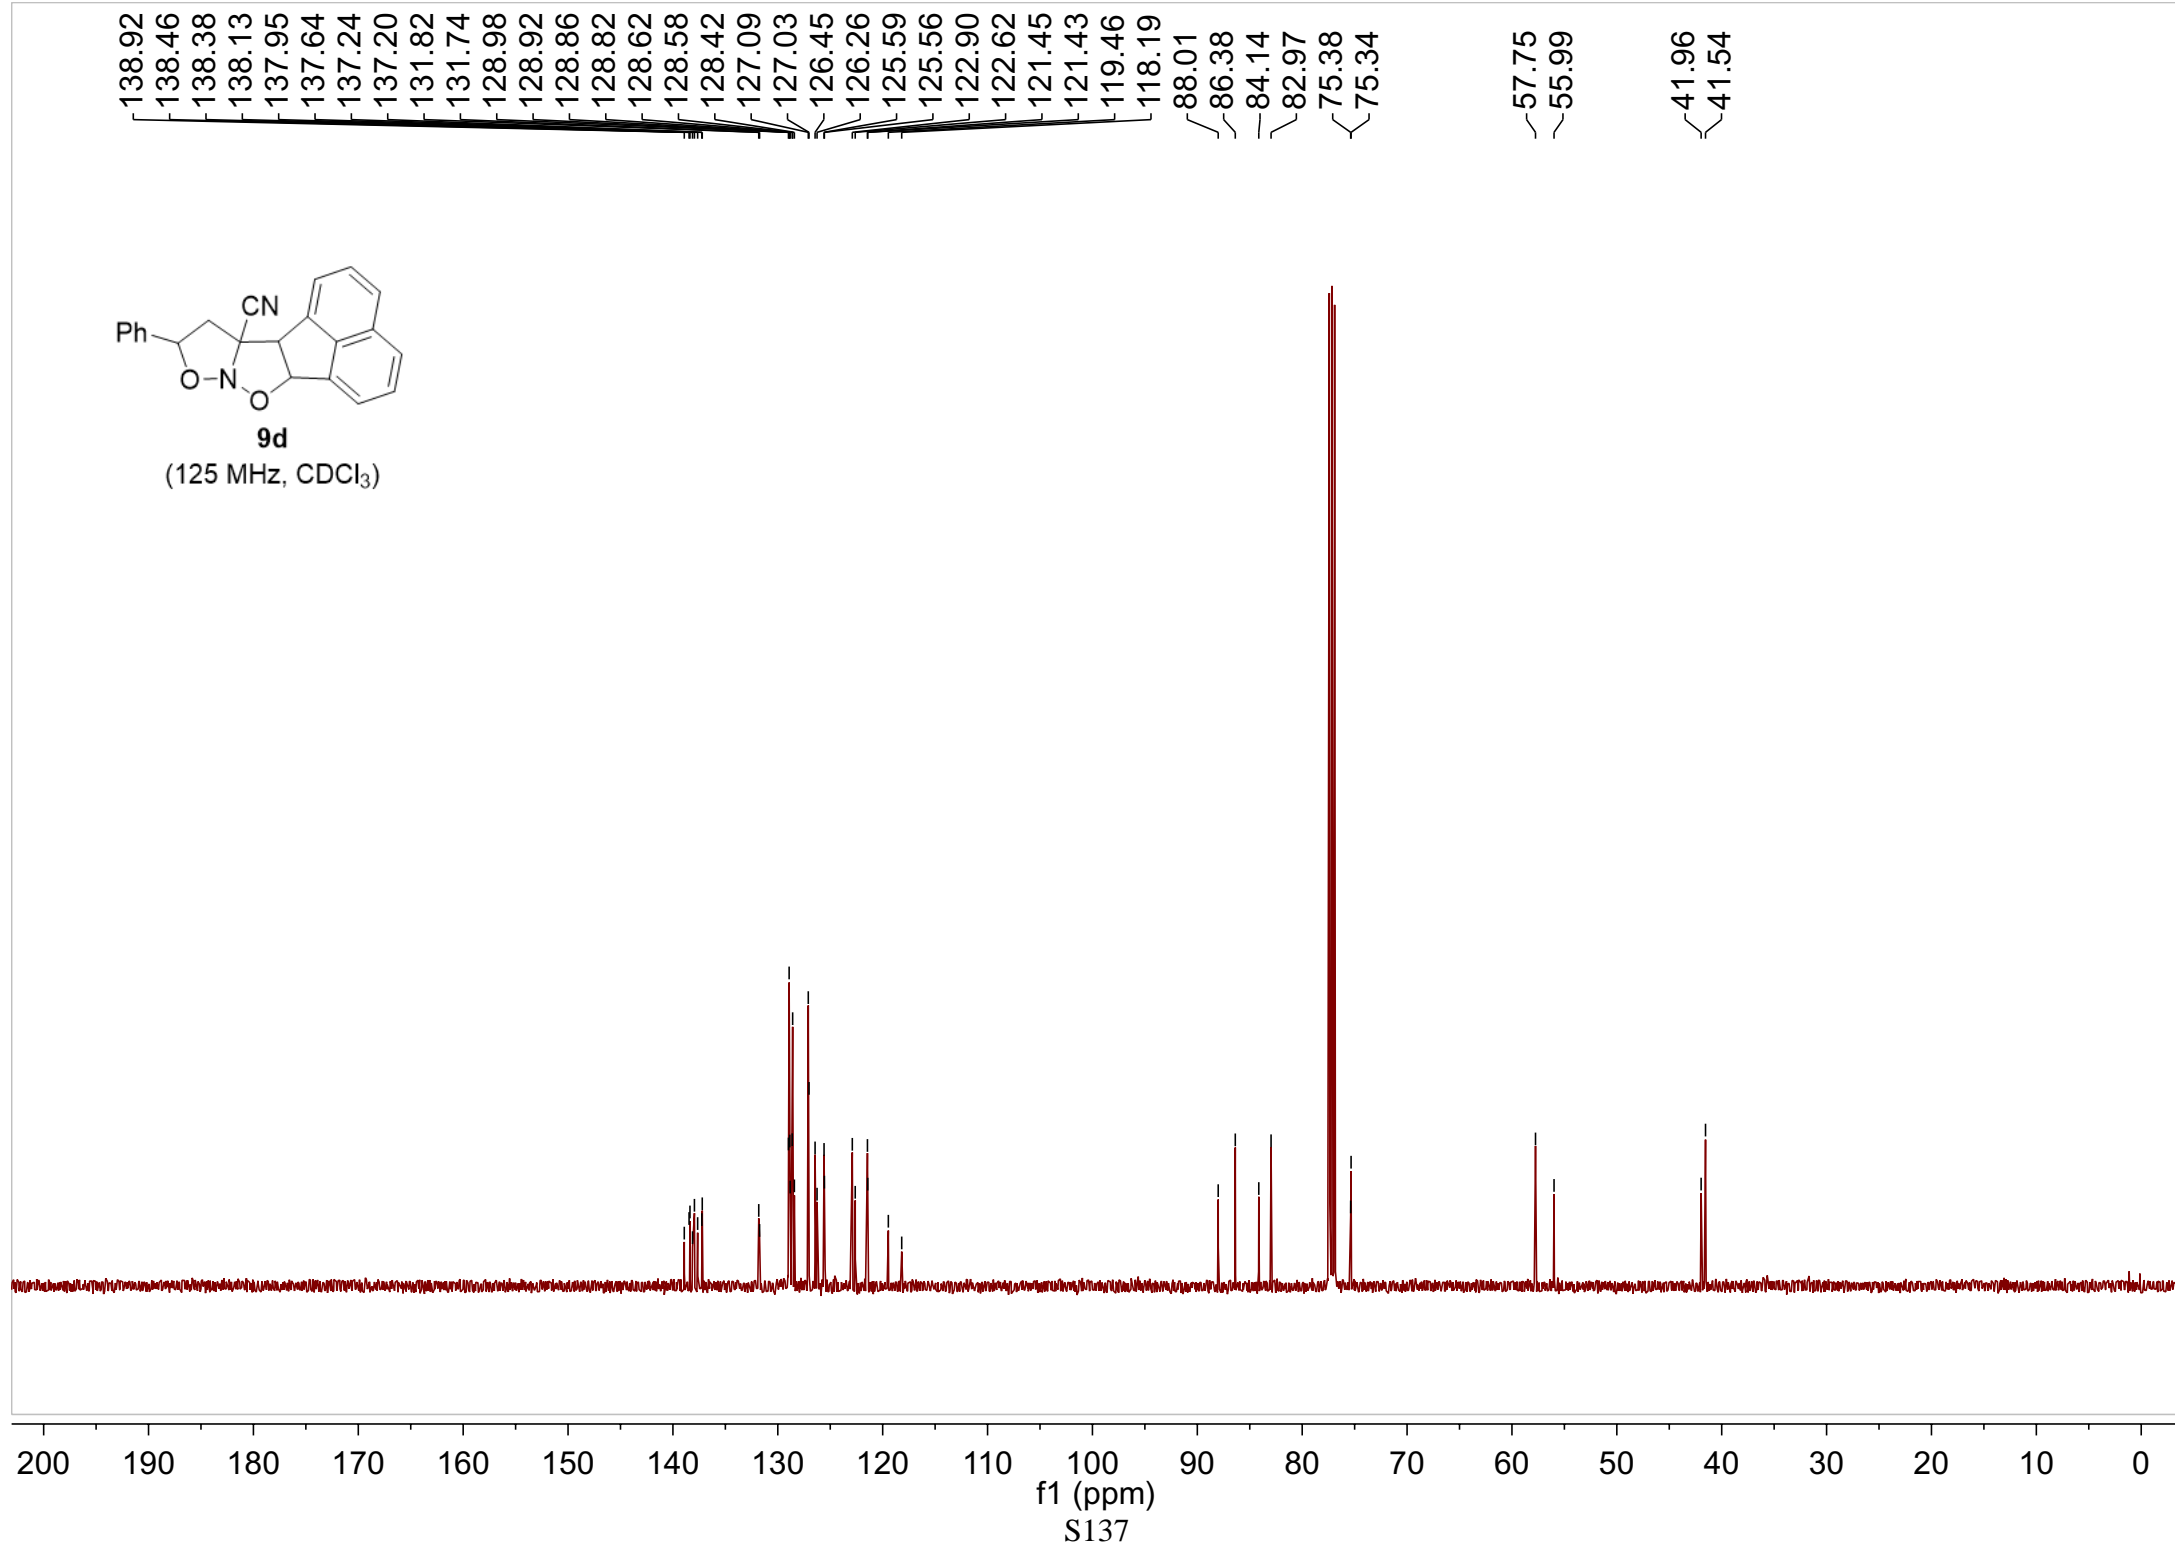

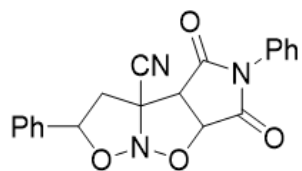

**9e**

(500 MHz, CDCl<sub>3</sub>)

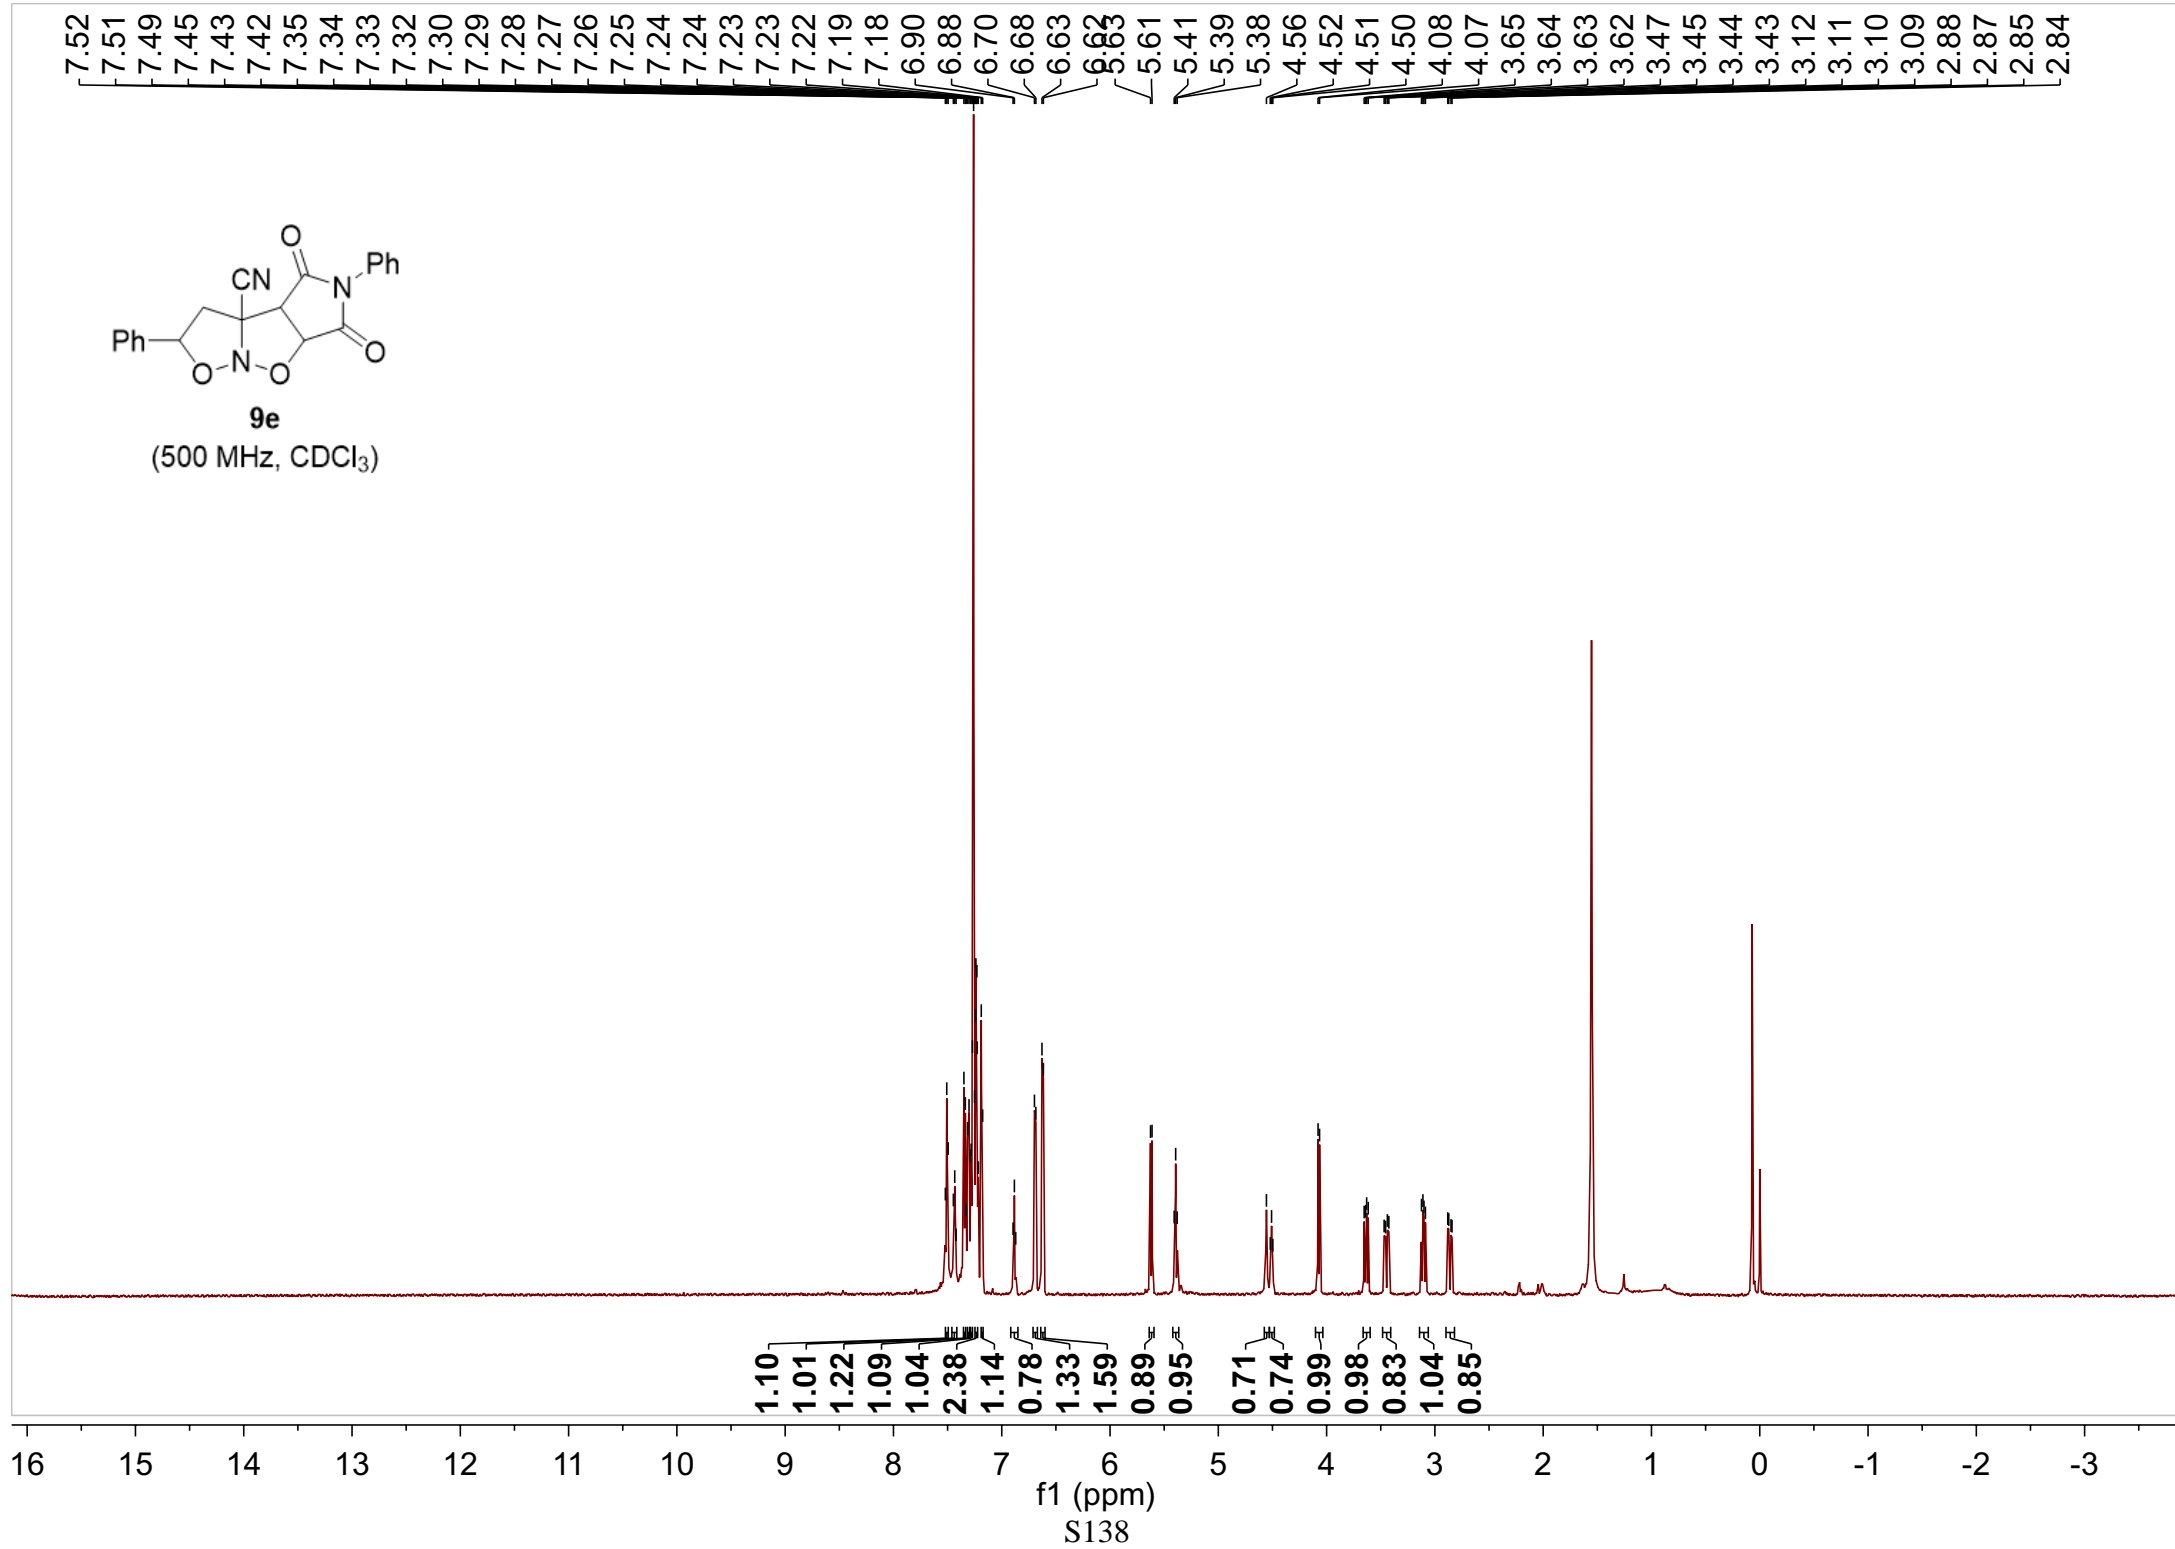

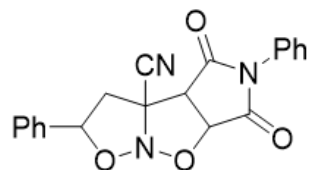

**9e**

(125 MHz, CDCl<sub>3</sub>)

176.08  
173.63  
170.80  
170.34

146.20  
133.88  
130.35  
129.75  
129.47  
129.26  
129.11  
129.03  
126.86  
126.44  
125.95  
119.88  
116.59  
114.08

83.63  
76.58  
75.01

53.28  
51.89

38.57  
36.40

210 200 190 180 170 160 150 140 130 120 110 100 90 80 70 60 50 40 30 20 10 0 -10

f1 (ppm)

S139

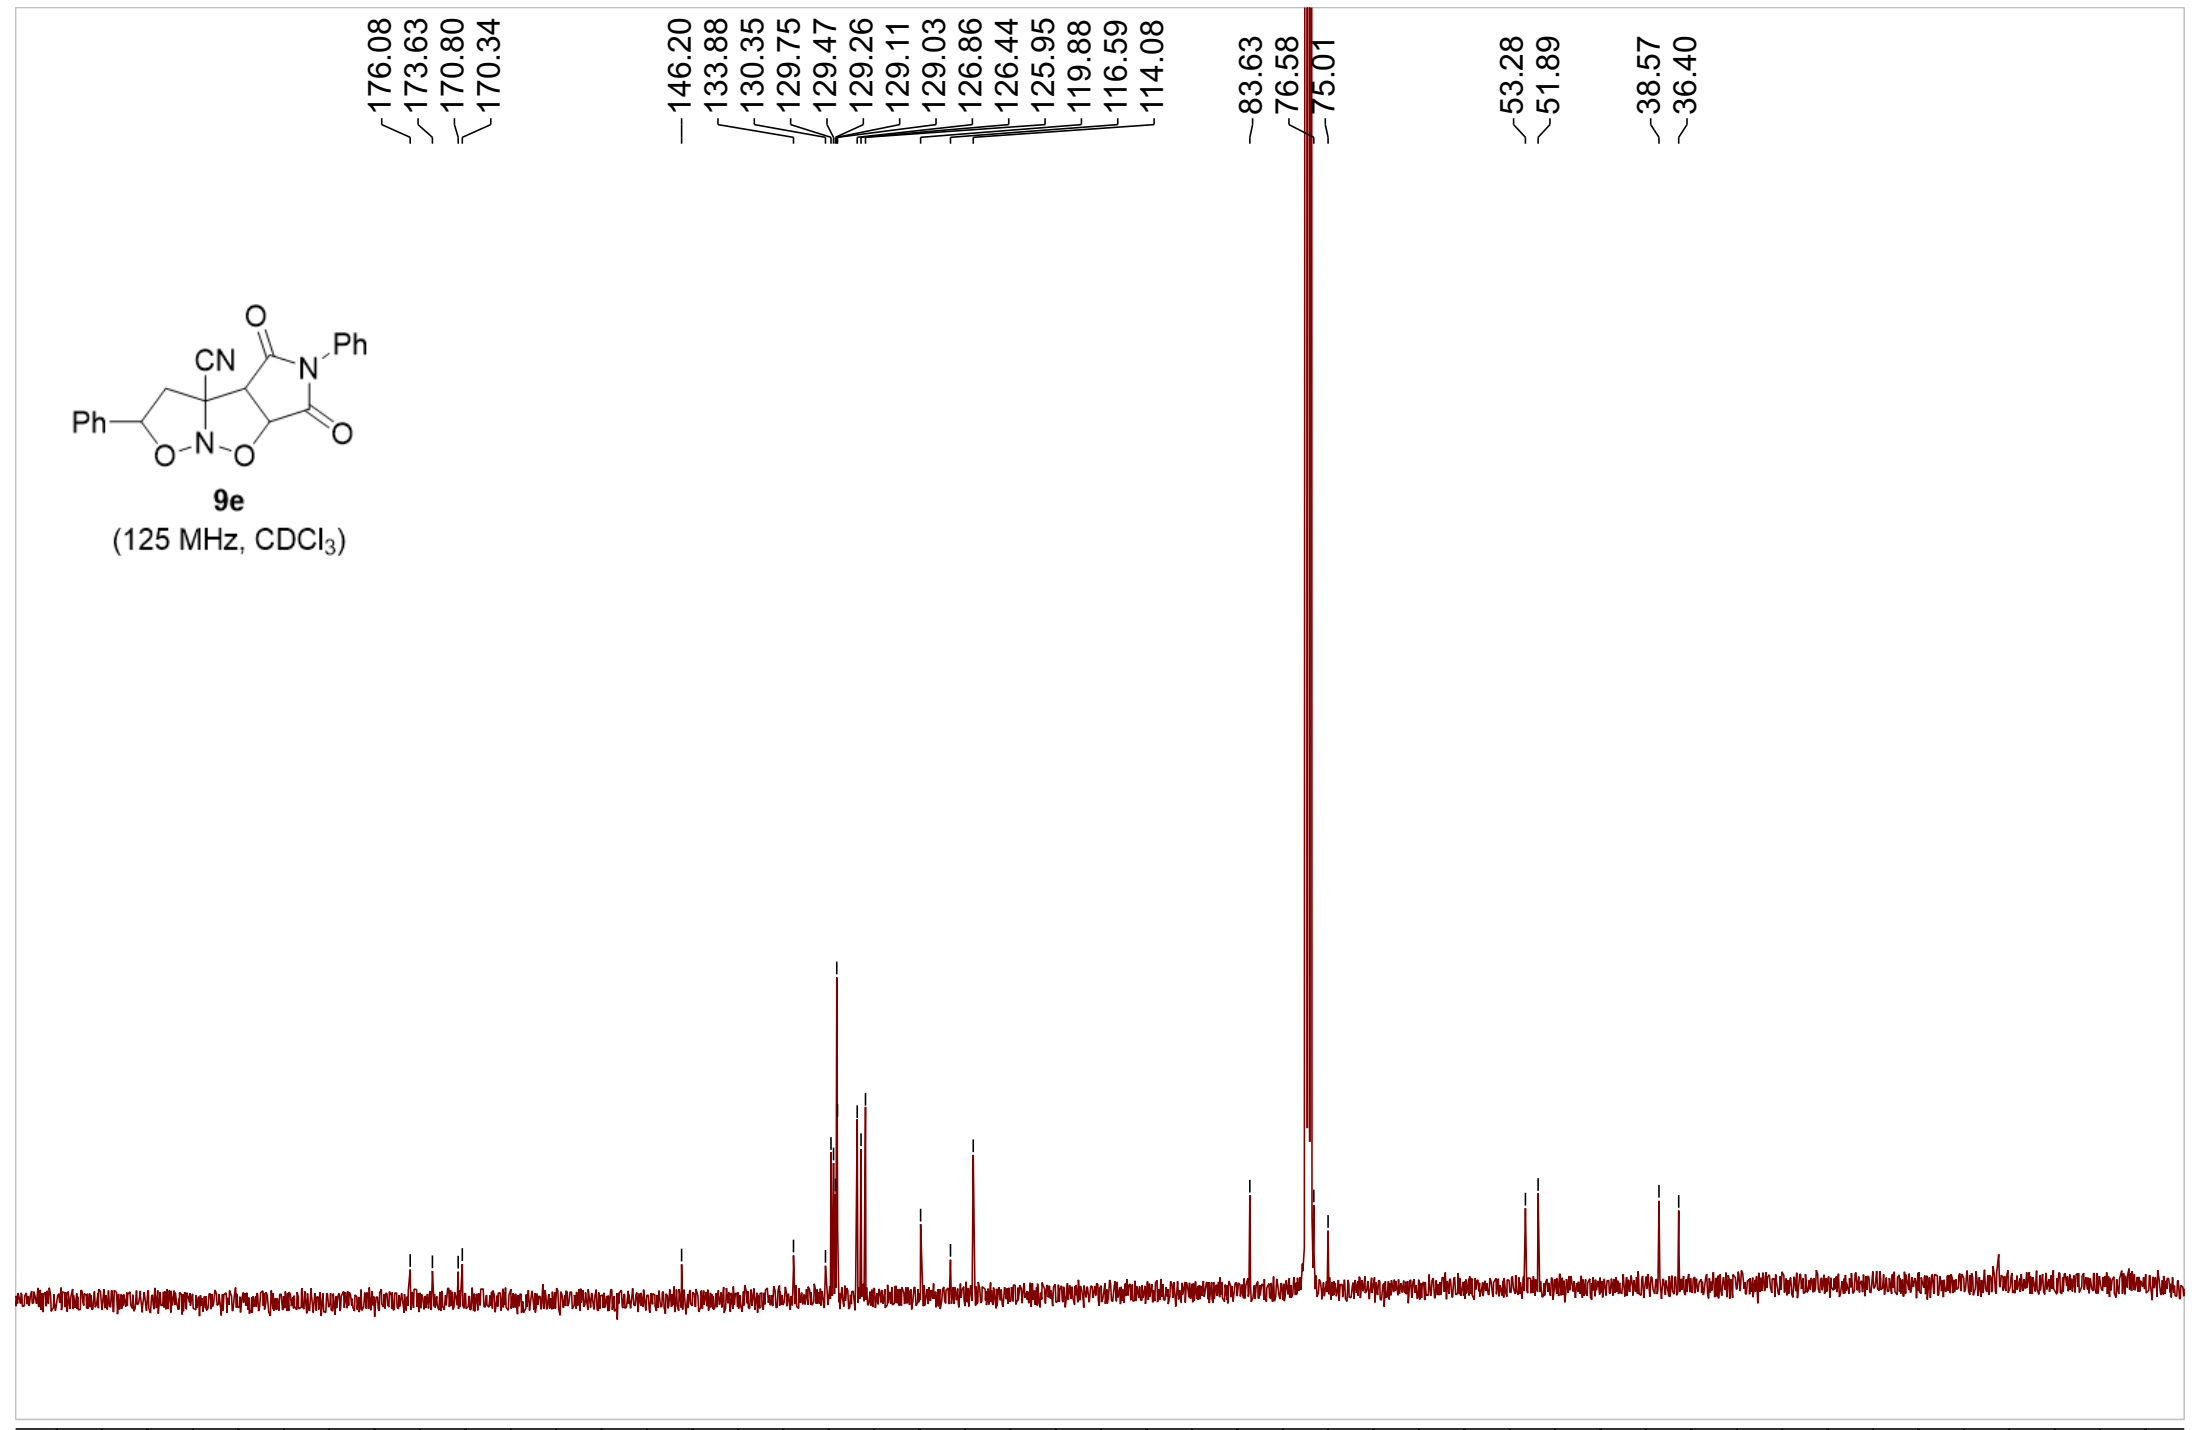

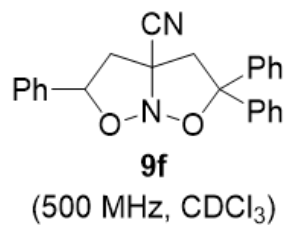

7.61  
7.59  
7.44  
7.44  
7.43  
7.43  
7.42  
7.42  
7.40  
7.40  
7.39  
7.38  
7.37  
7.37  
7.36  
7.35  
7.35  
7.32  
7.32  
7.31  
7.31  
7.30  
7.30  
7.30  
7.29  
7.29  
5.61  
5.60  
5.59  
5.58  
3.79  
3.77  
3.18  
3.15  
2.80  
2.78  
2.77  
2.76  
2.70  
2.68  
2.68  
2.66

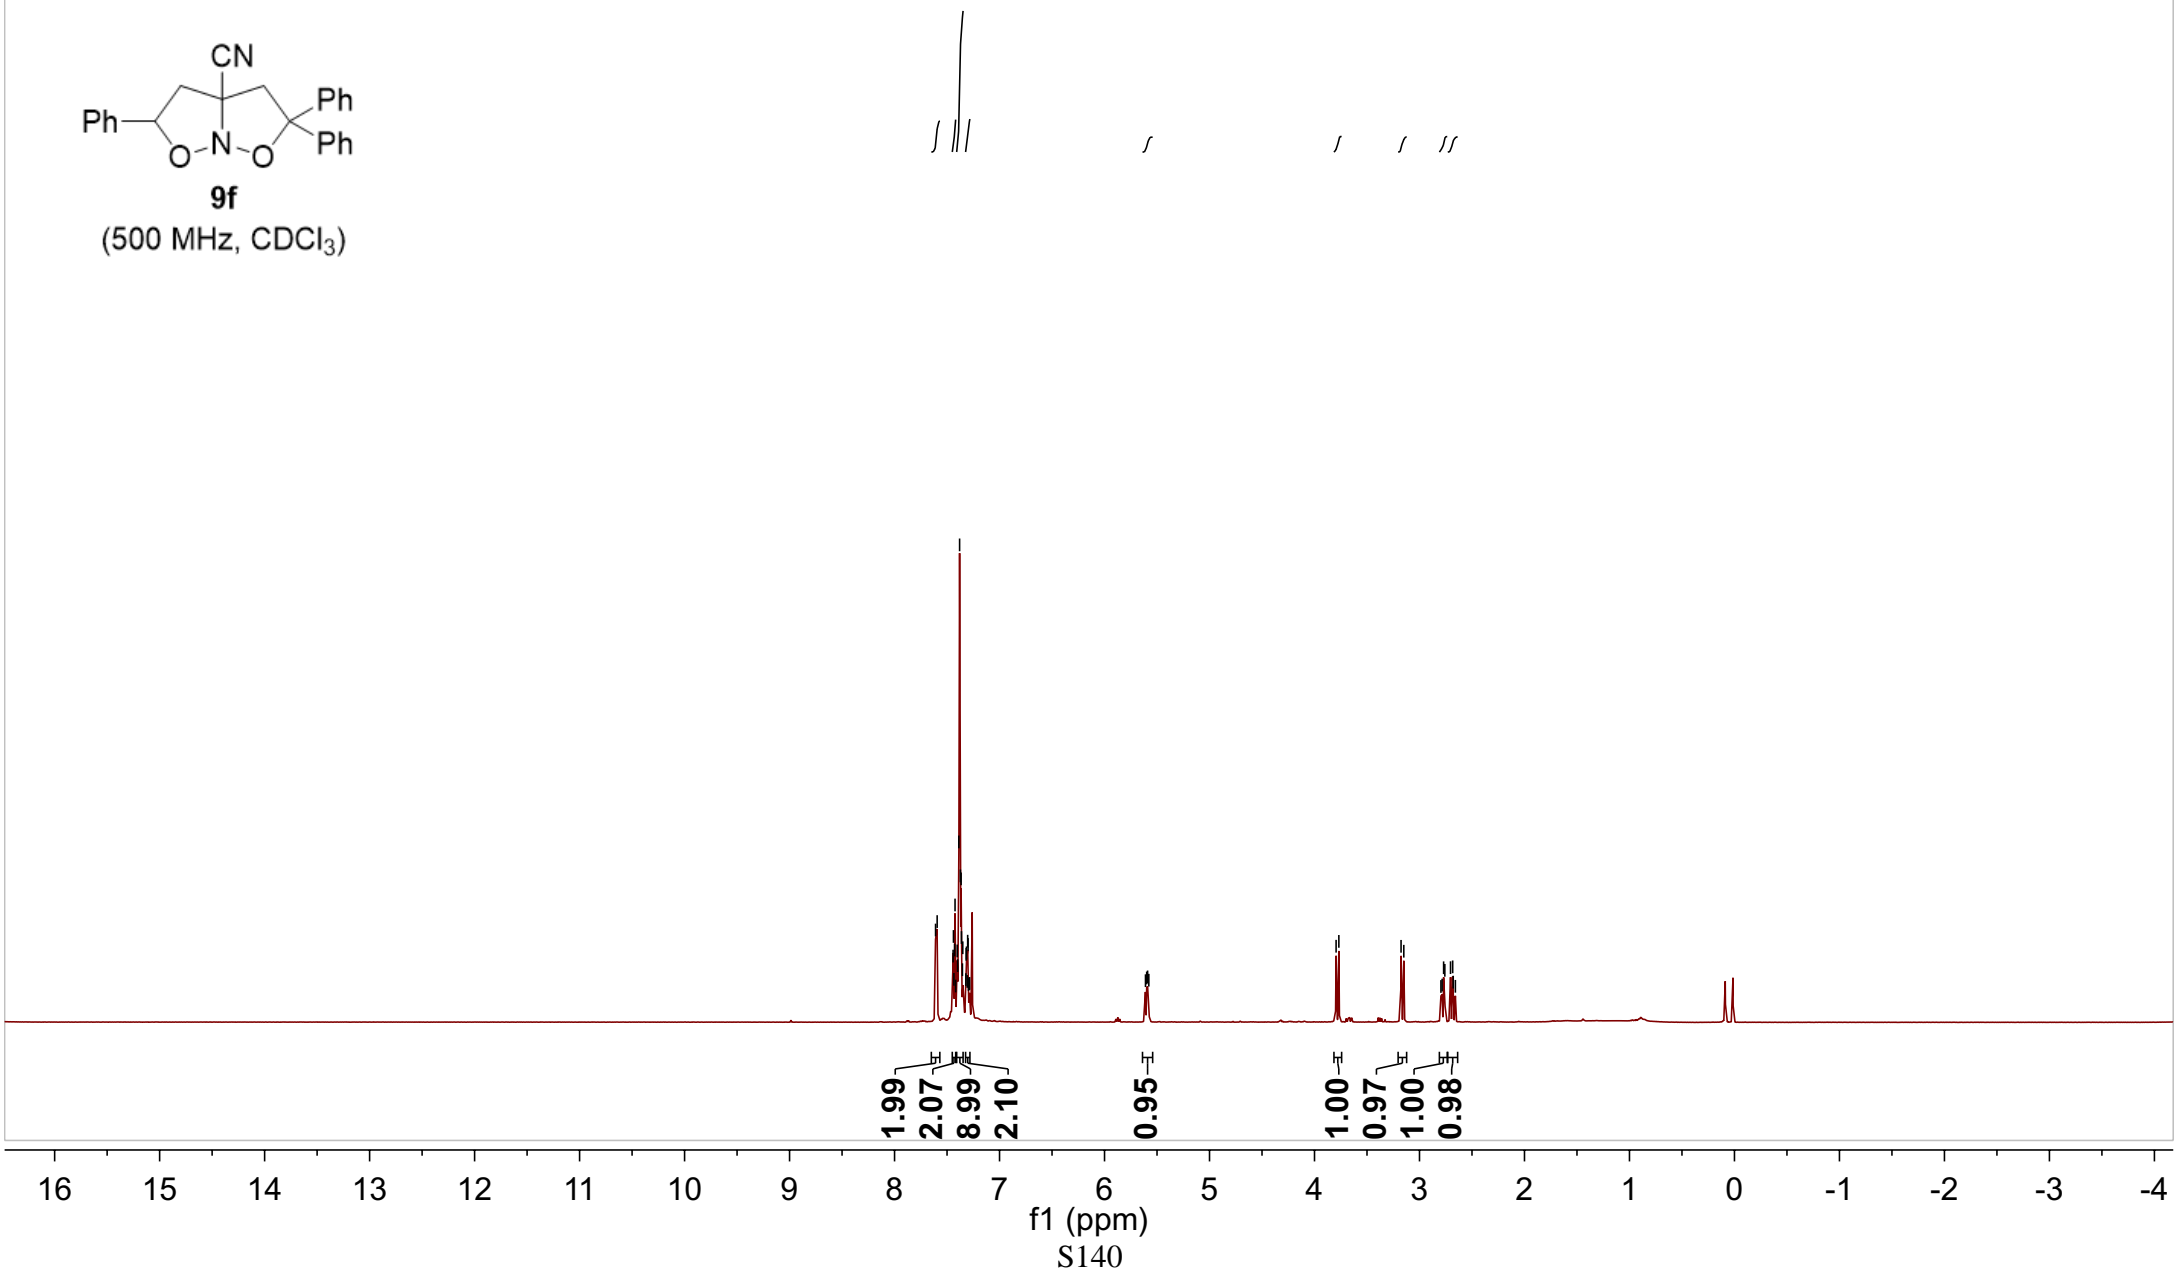

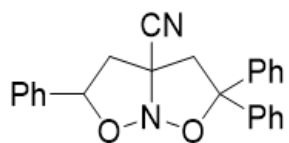

**9f**

(125 MHz, CDCl<sub>3</sub>)

142.40  
142.10  
135.06  
129.34  
128.98  
128.81  
128.70  
128.18  
128.06  
127.18  
125.88  
125.59  
118.74

~87.27  
~84.03

~72.65

~51.18  
~48.19

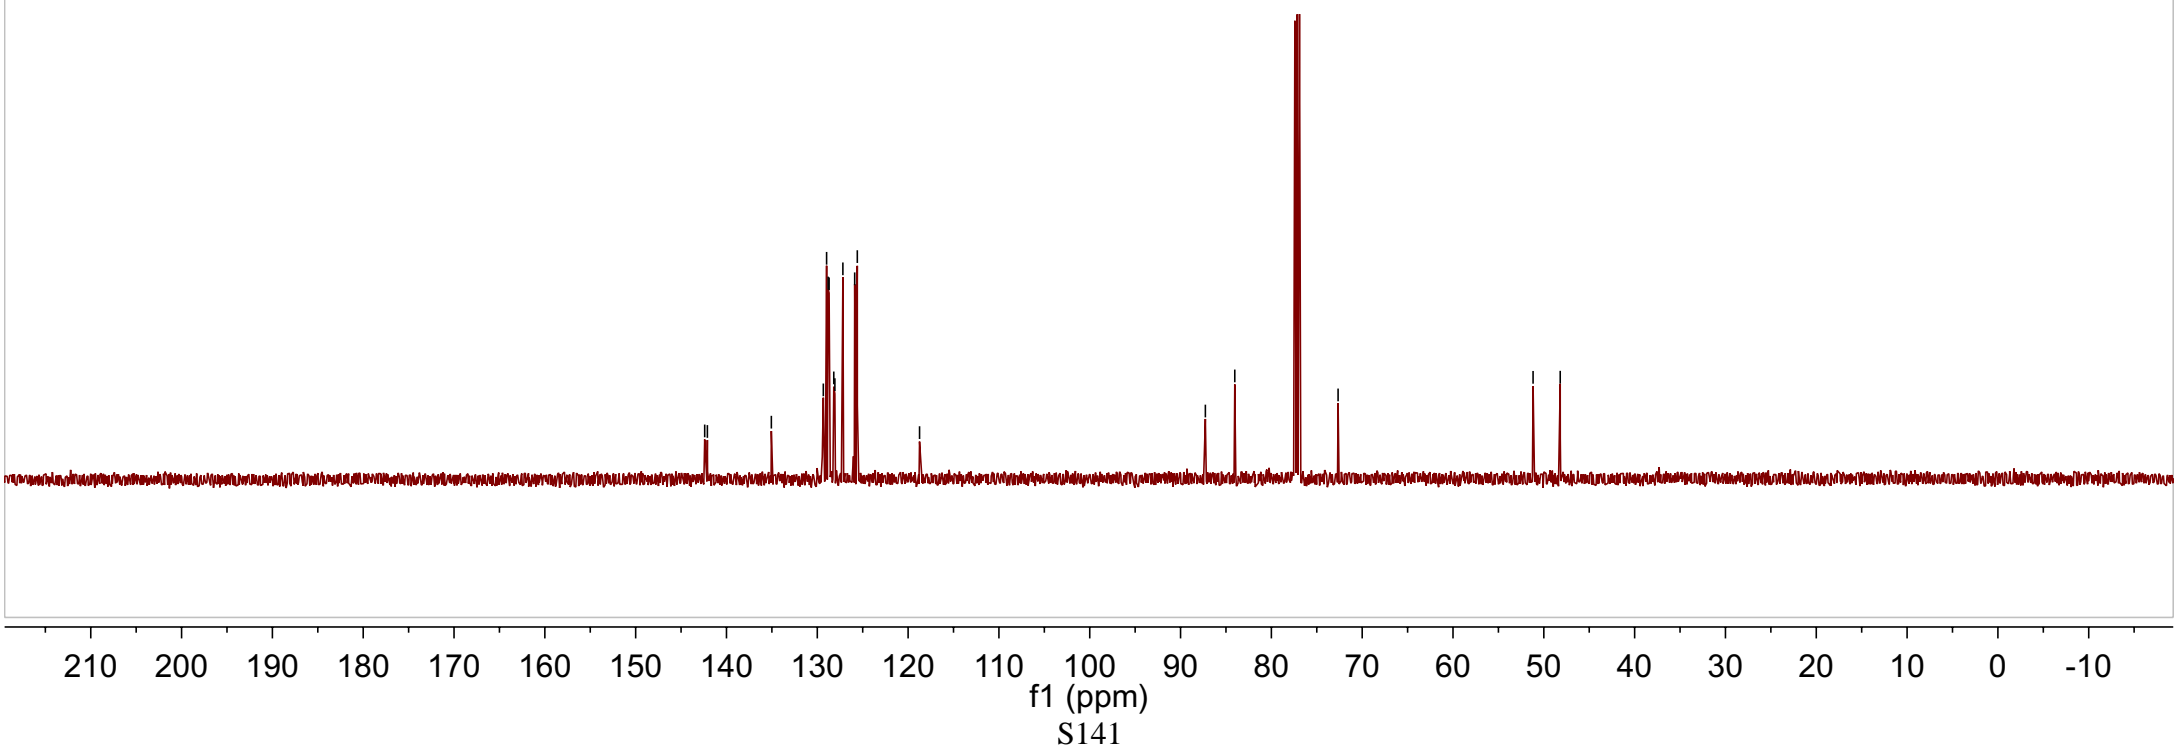

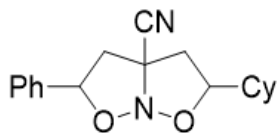

**9g** (major isomer)  
(500 MHz, CDCl<sub>3</sub>)

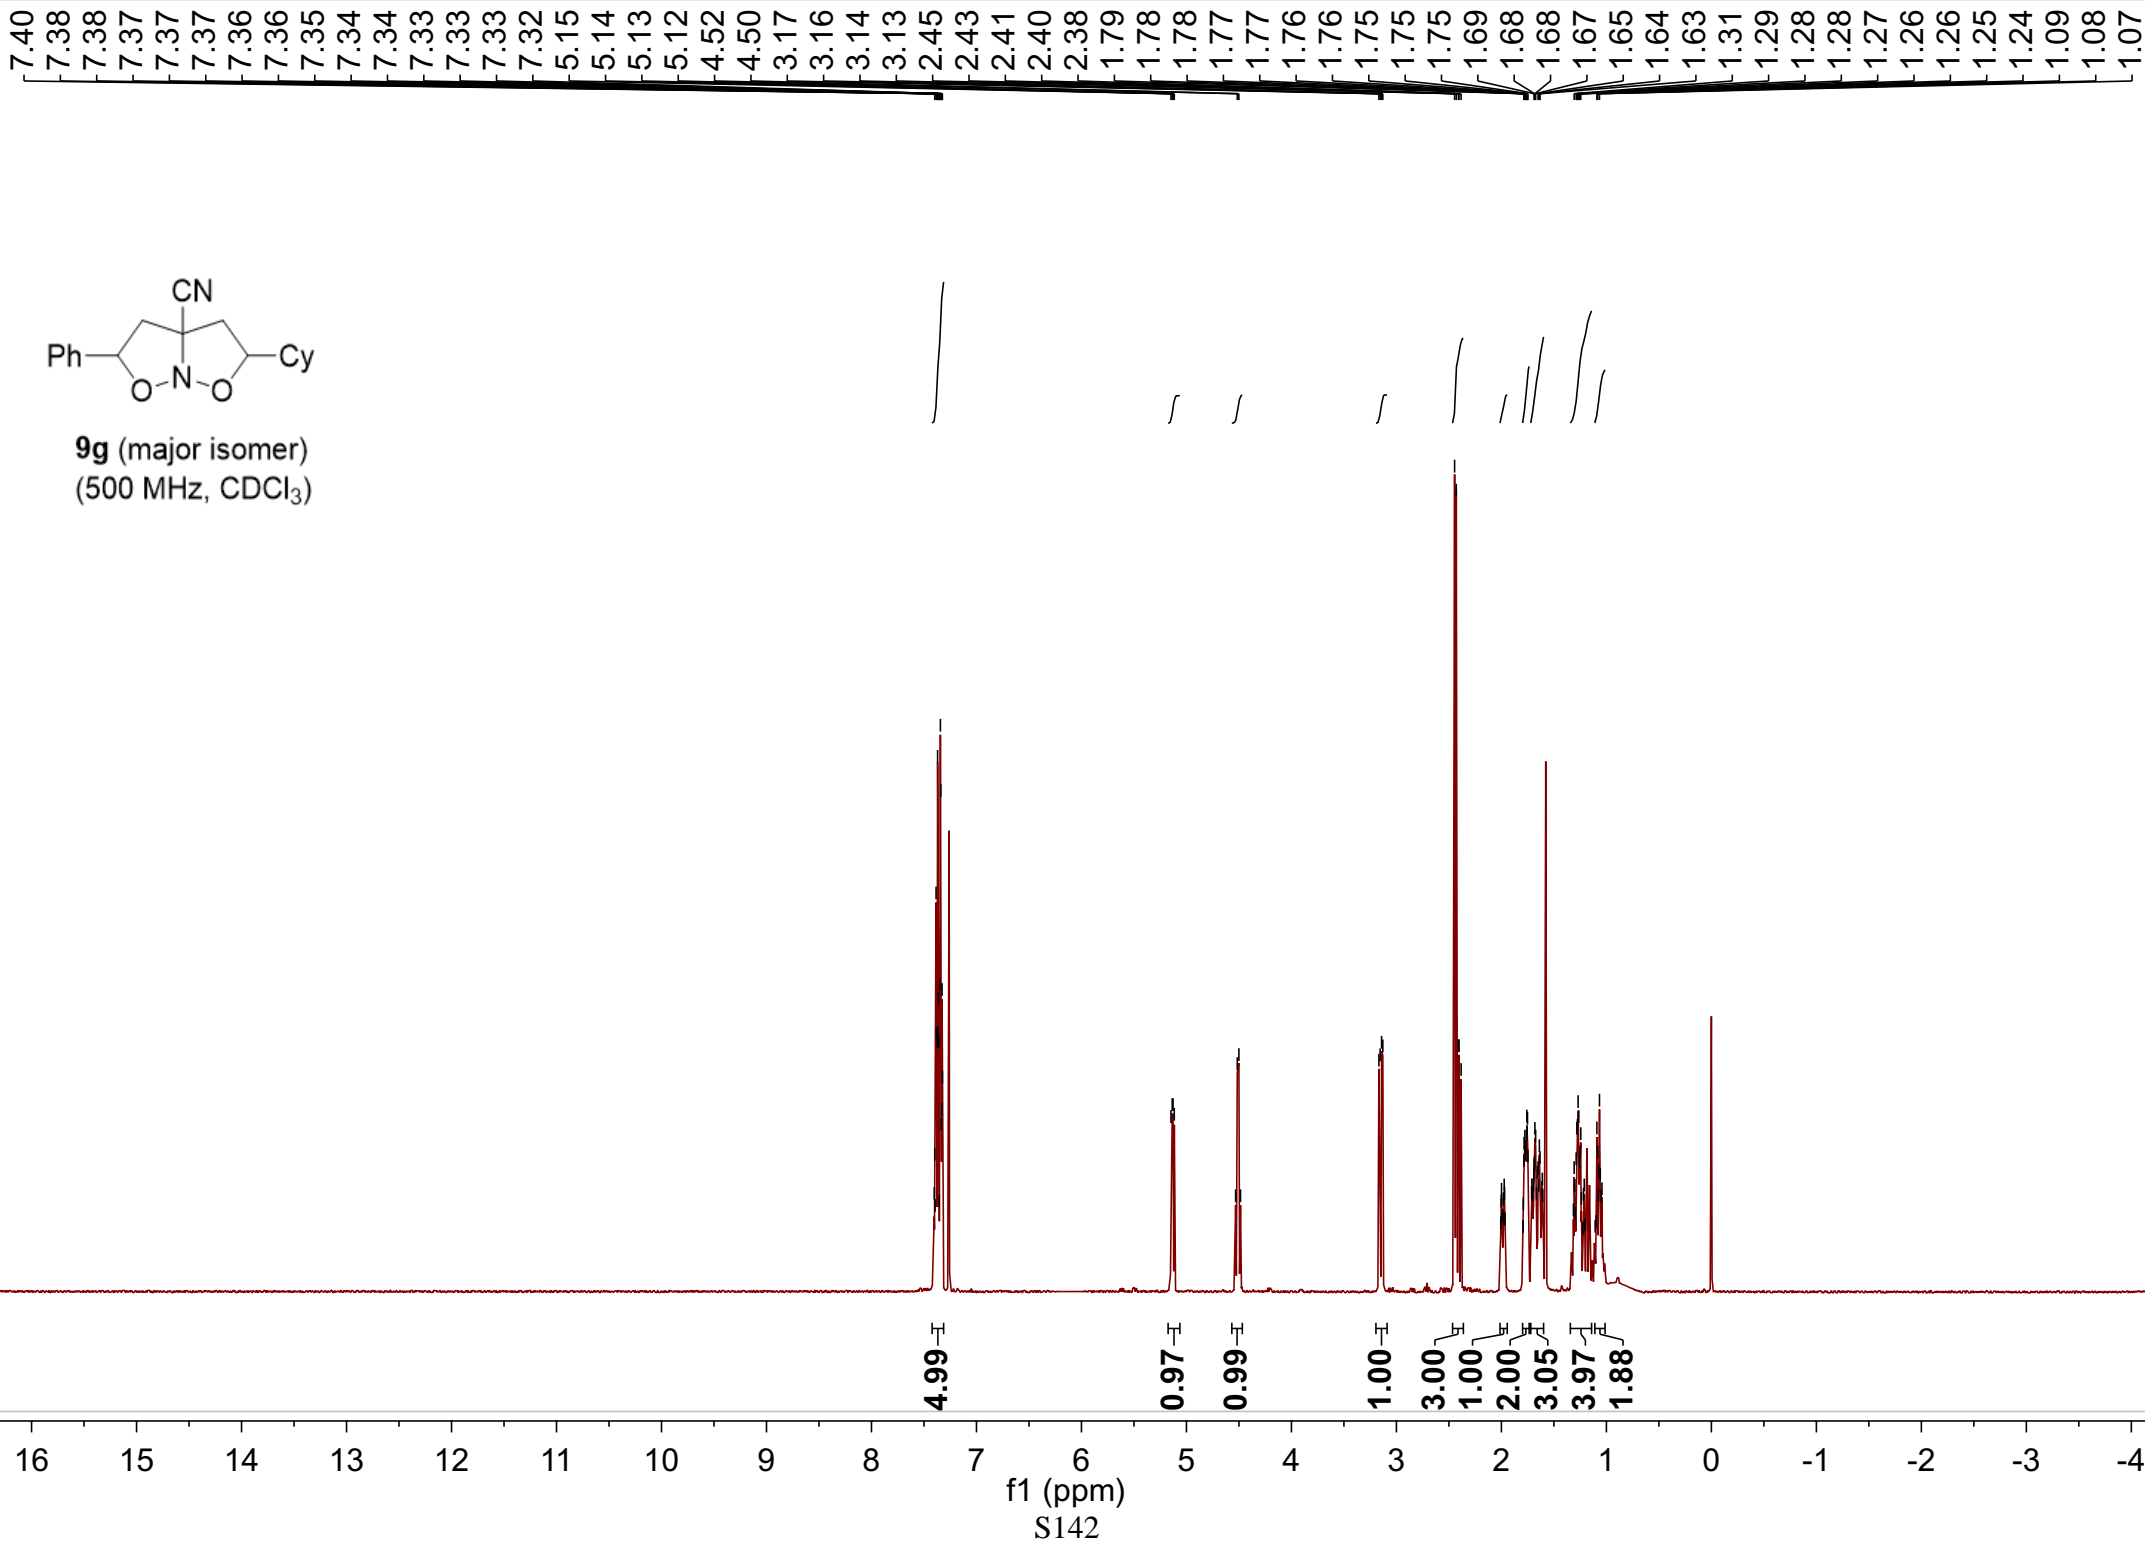

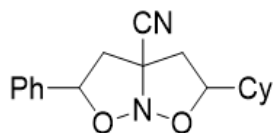

**9g** (major isomer)  
(125 MHz, CDCl<sub>3</sub>)

~136.31  
~128.97  
~128.95  
~126.27  
~119.52  
  
-87.02  
-77.31  
-72.16  
  
~47.63  
~43.63  
~40.64  
29.89  
29.28  
26.28  
25.86  
25.62

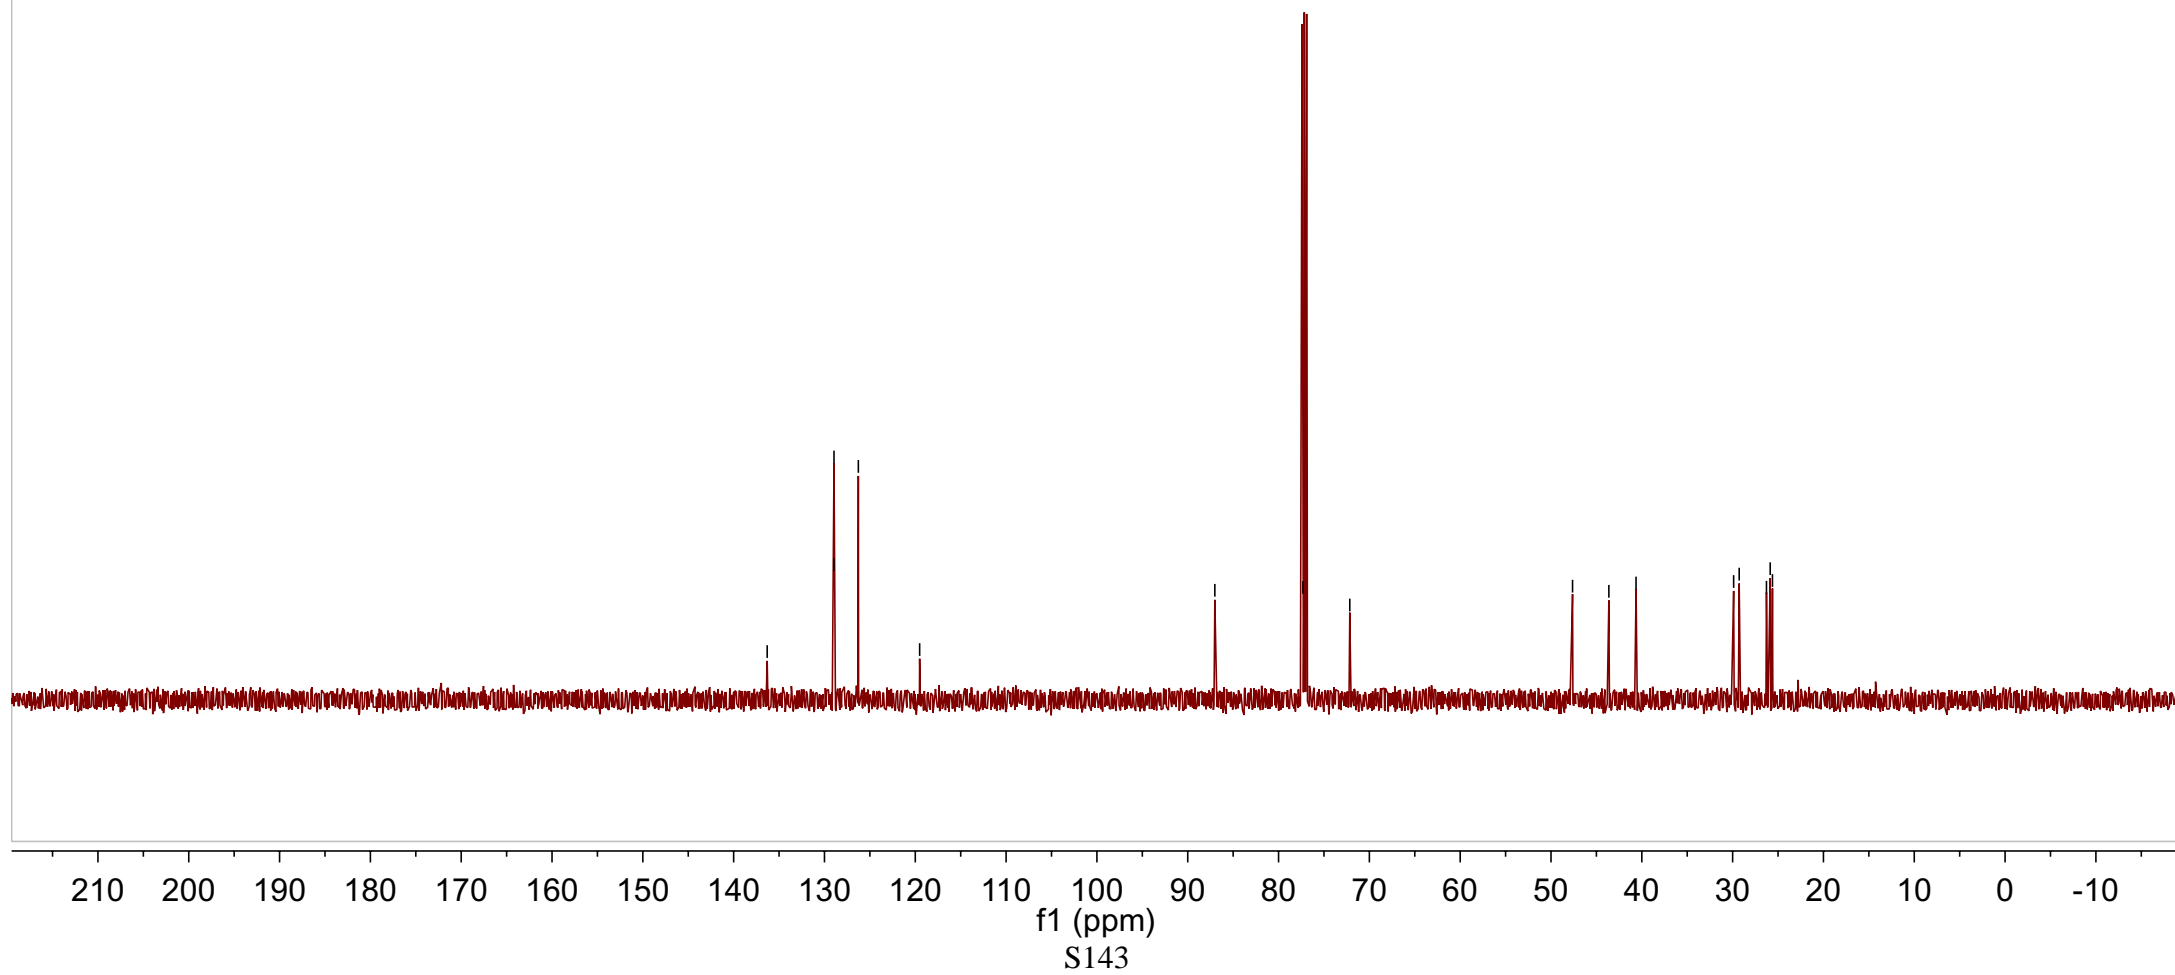

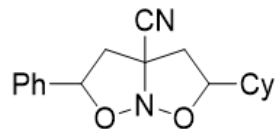

**9g** (minor isomer)  
(500 MHz, CDCl<sub>3</sub>)

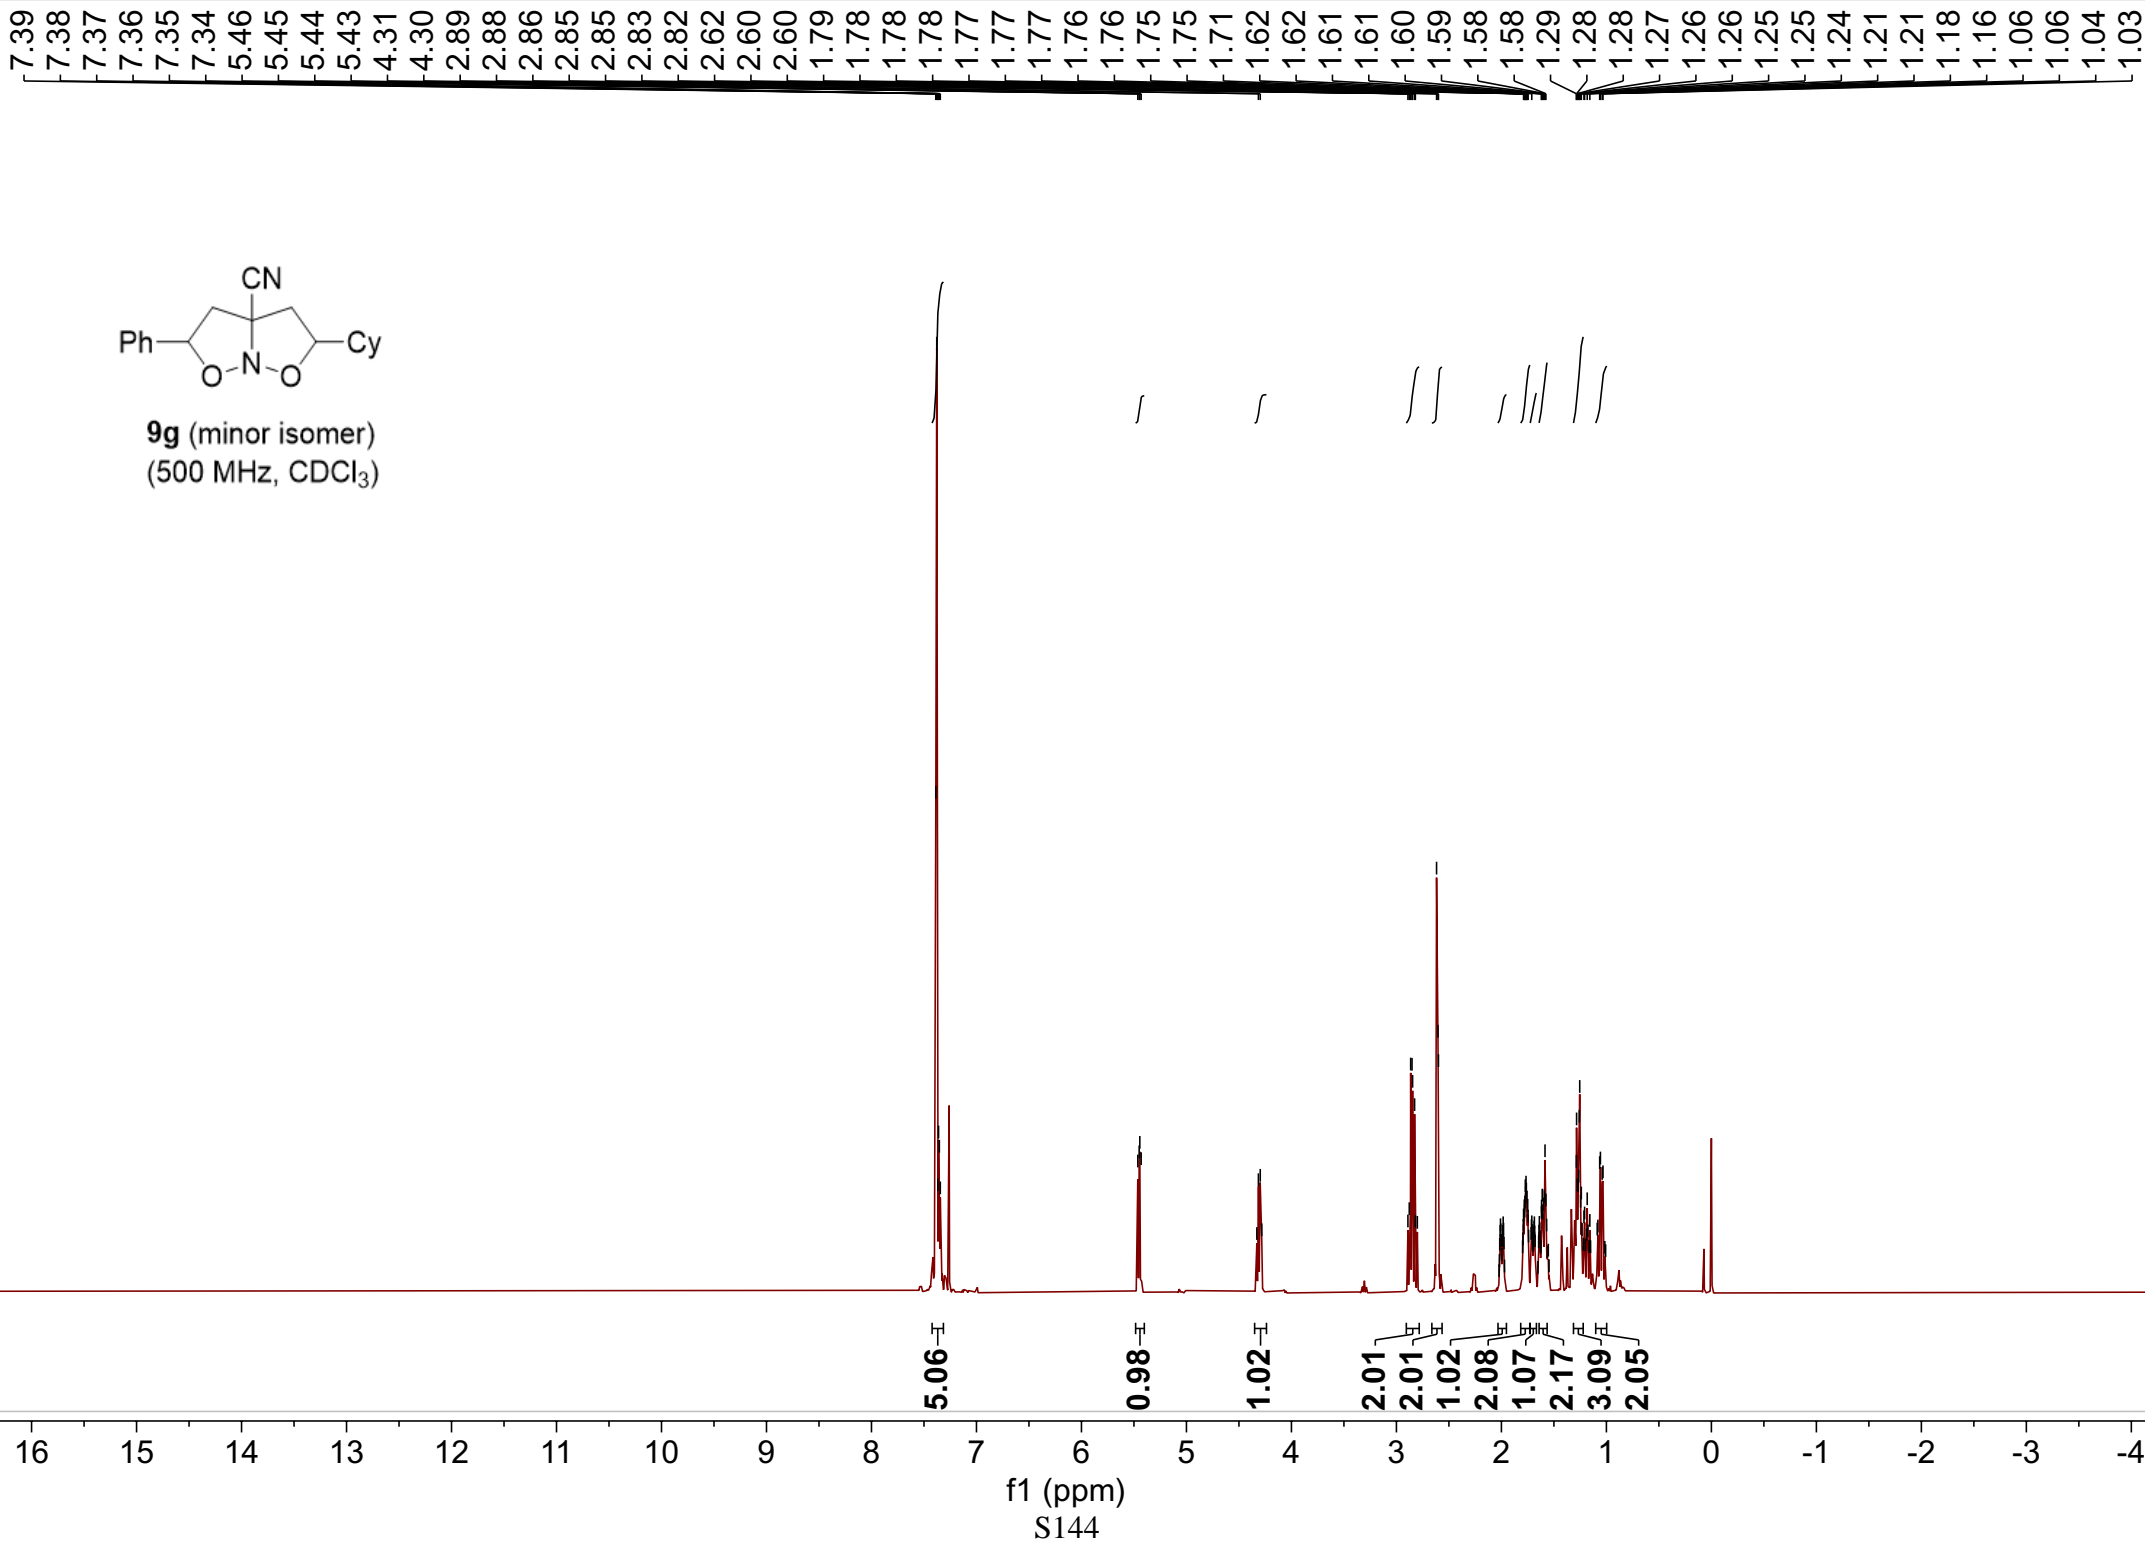



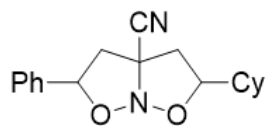

**9g** (minor isomer)  
(125 MHz, CDCl<sub>3</sub>)

~136.77  
~129.10  
~128.96  
~126.66  
~119.05

~86.91  
~83.66  
-72.92

~48.12  
~43.42  
~41.82  
~29.82  
~28.98  
~26.27  
~25.81  
~25.56

210 200 190 180 170 160 150 140 130 120 110 100 90 80 70 60 50 40 30 20 10 0 -10

f1 (ppm)

S145

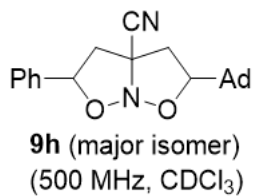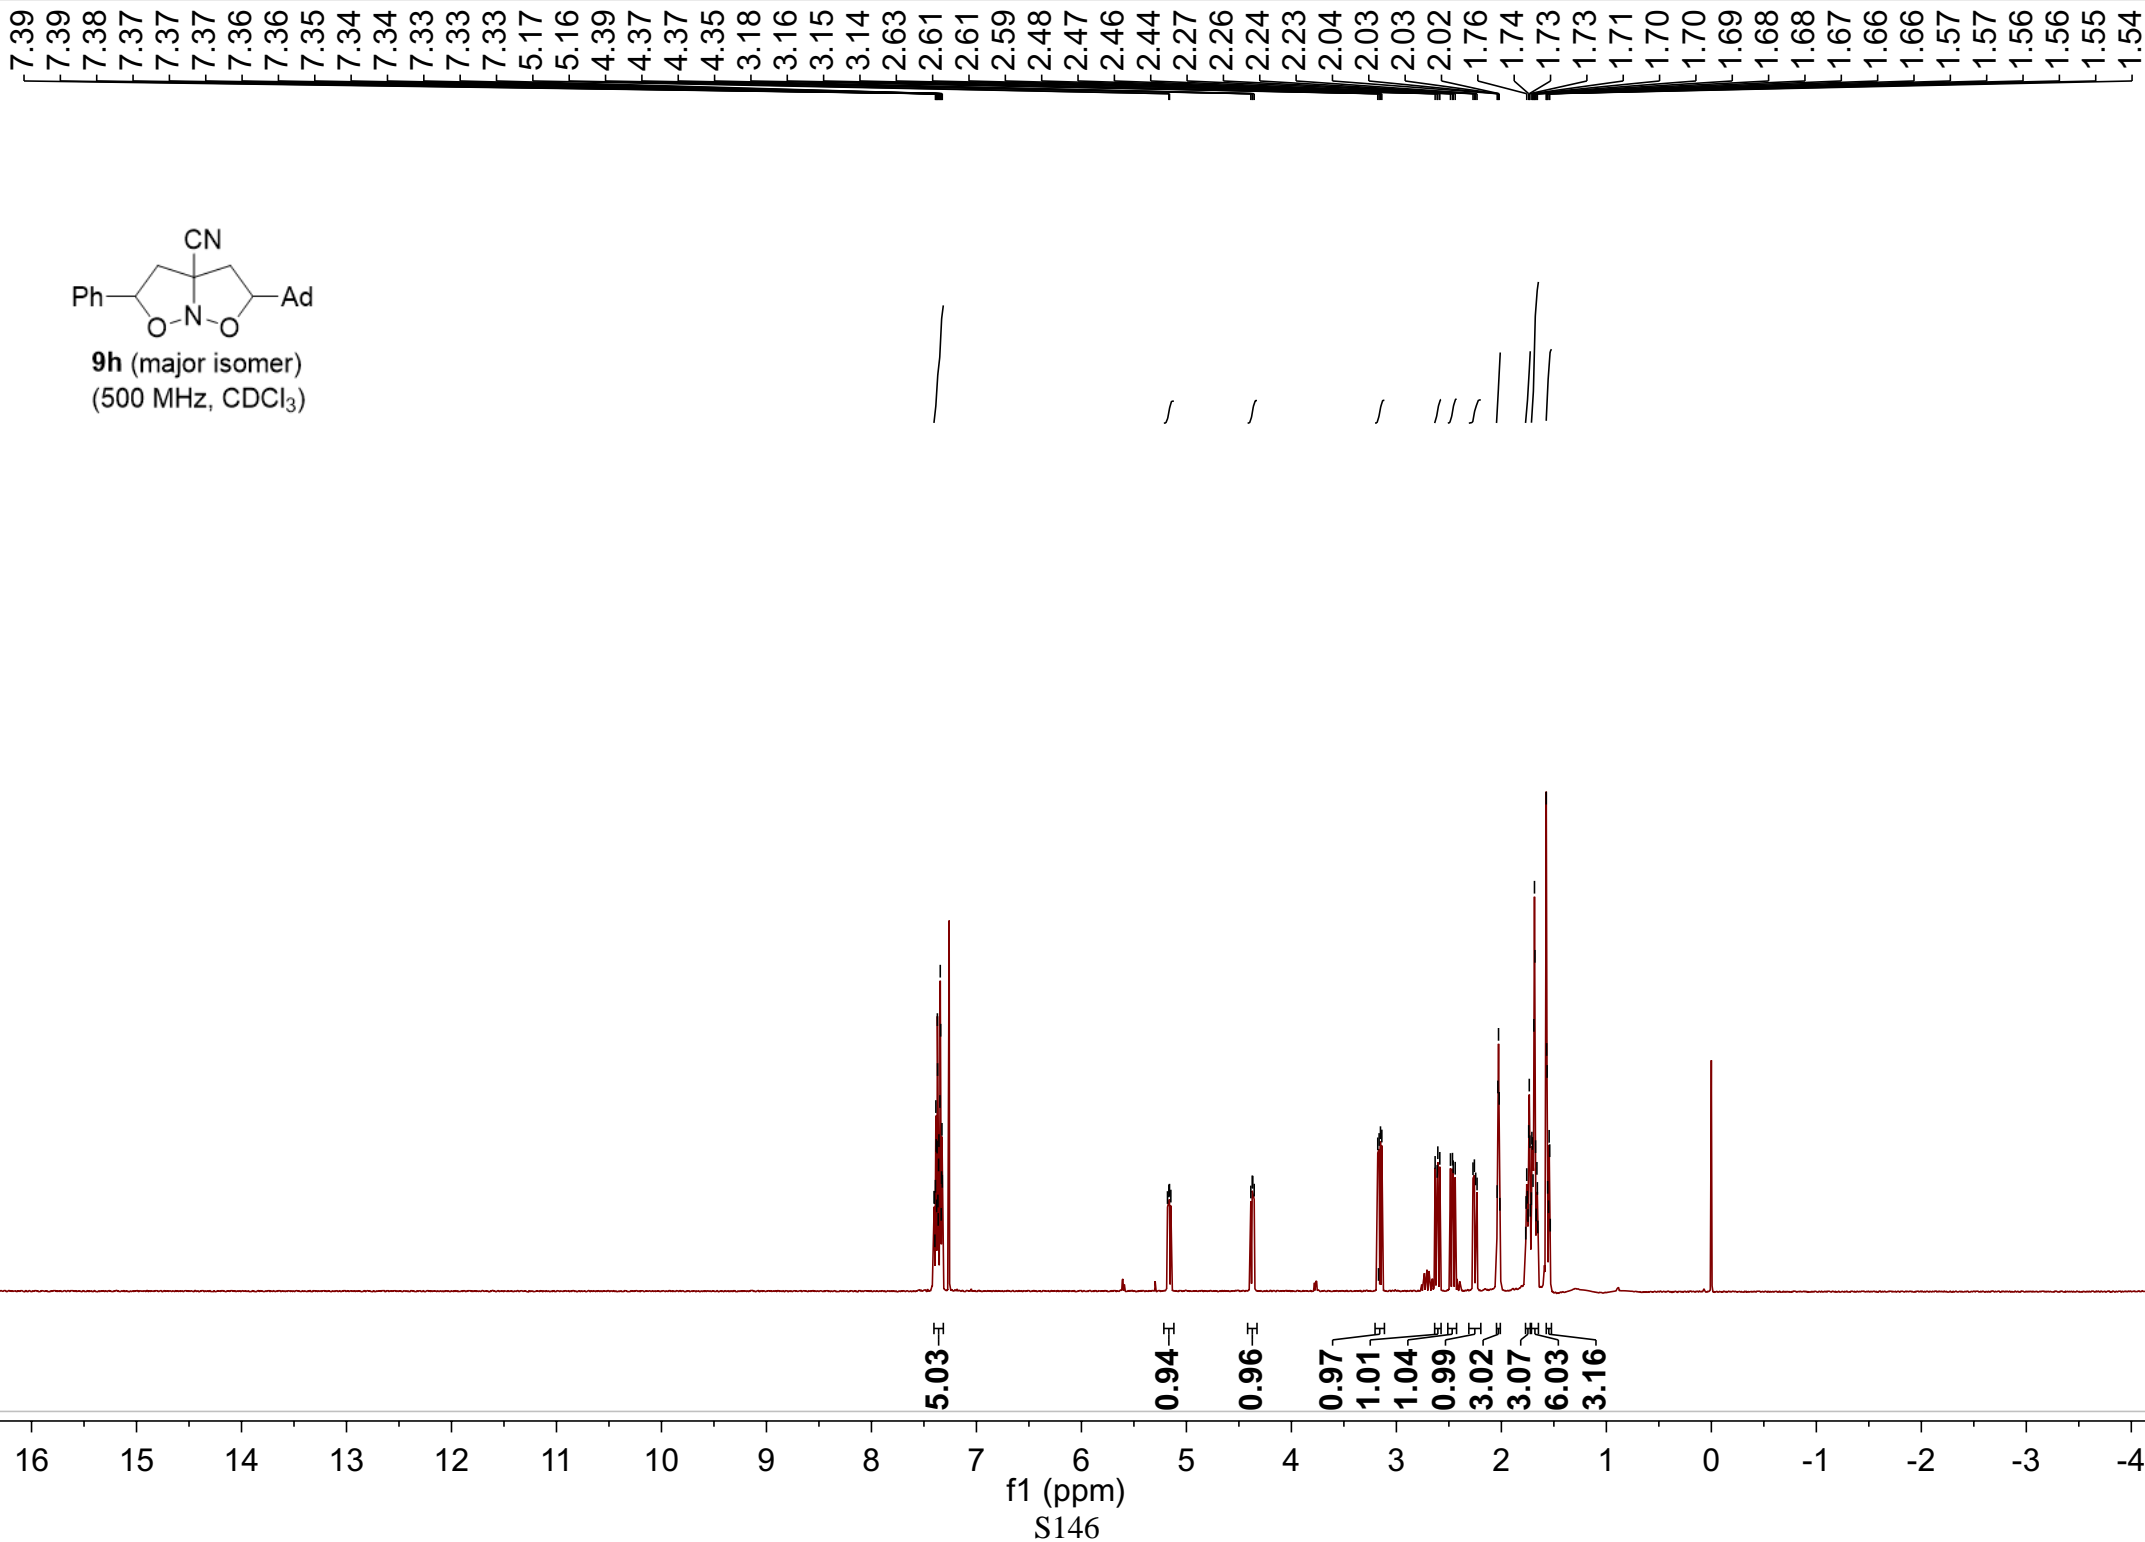

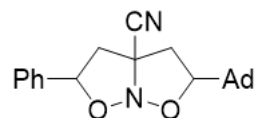

**9h** (major isomer)  
(125 MHz, CDCl<sub>3</sub>)

136.72  
128.96  
128.90  
126.26  
119.36  
-90.71  
-72.08  
-47.45  
39.16  
38.50  
37.02  
34.40  
28.08

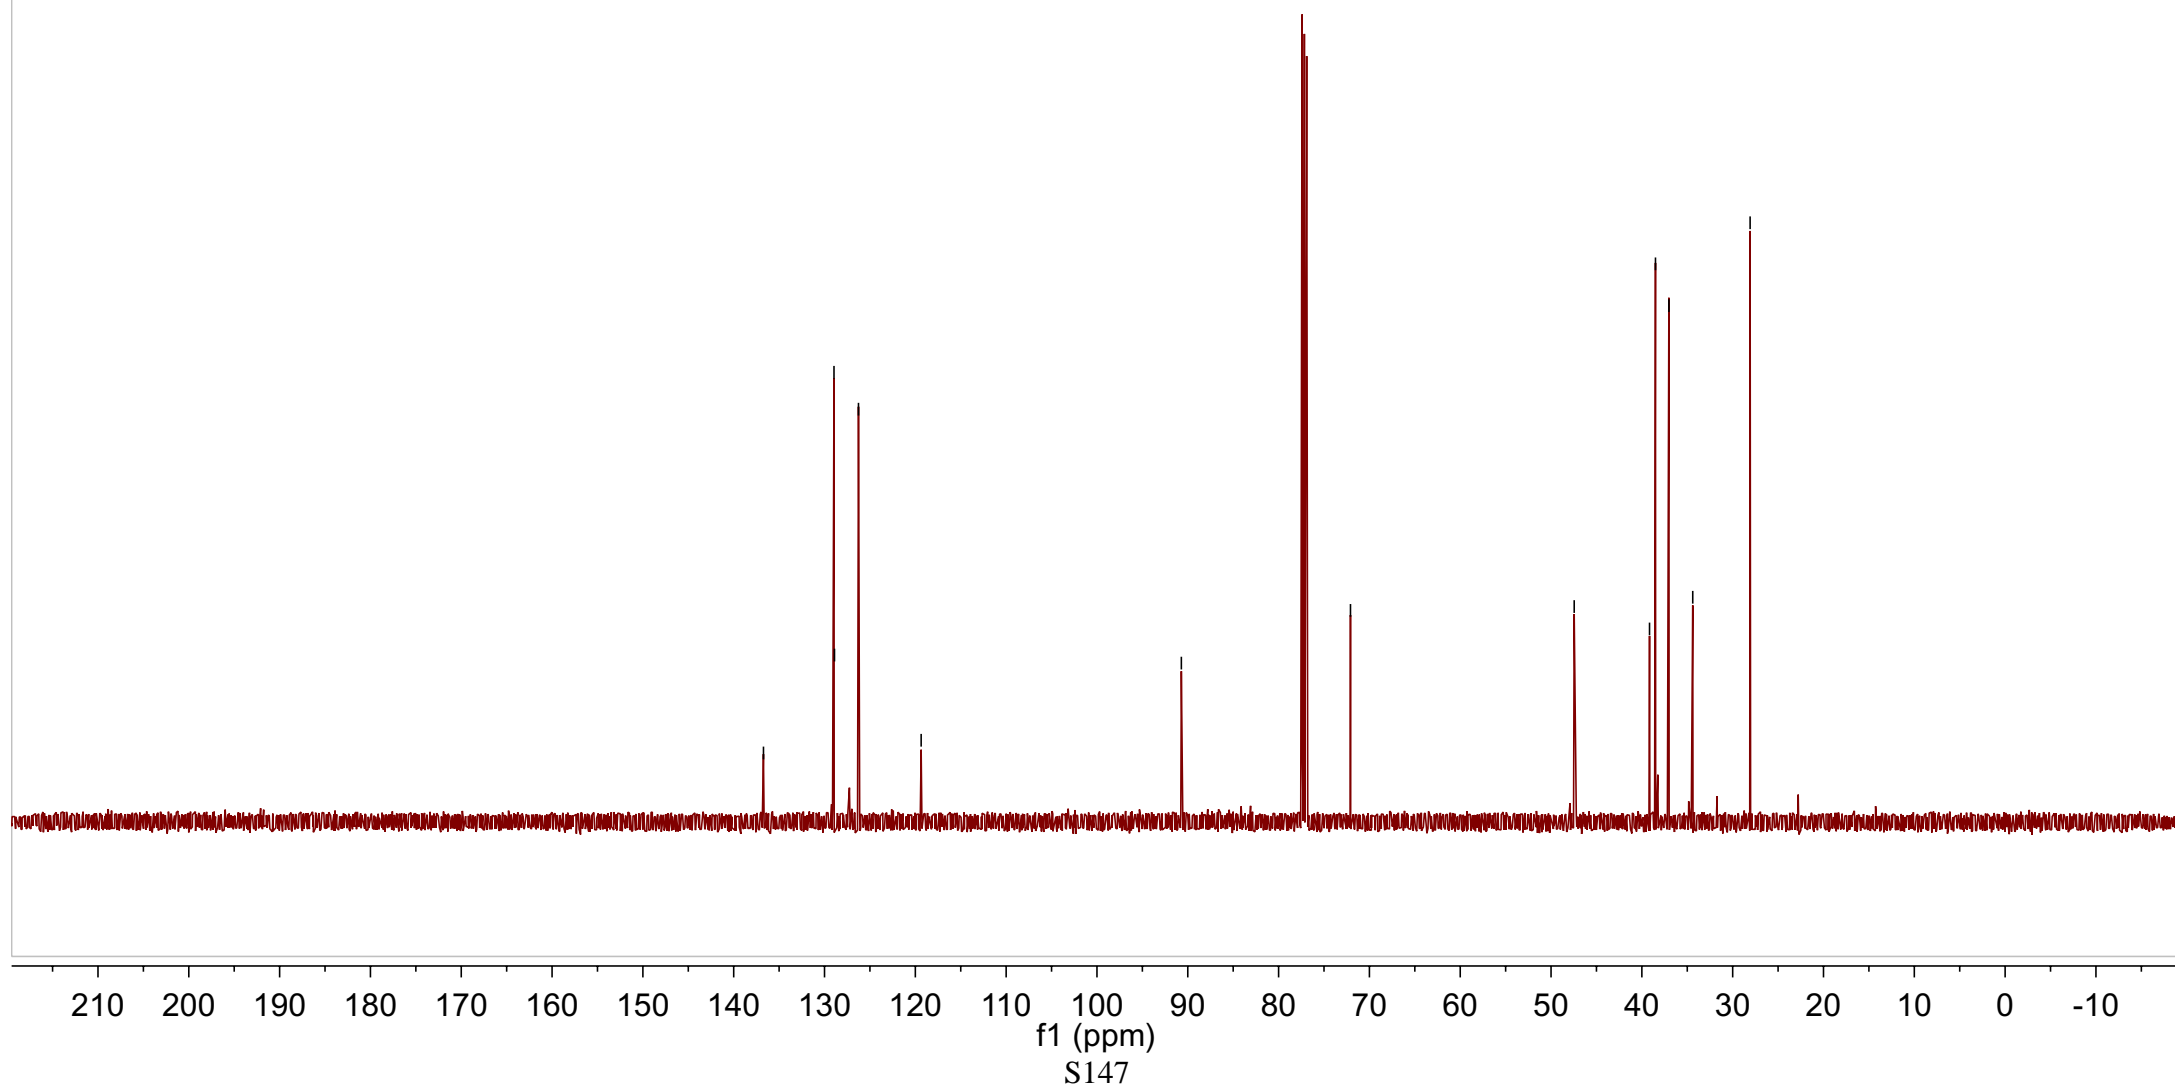

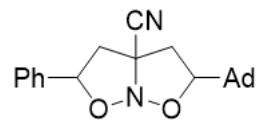

**9h** (minor isomer)  
(500 MHz, CDCl<sub>3</sub>)

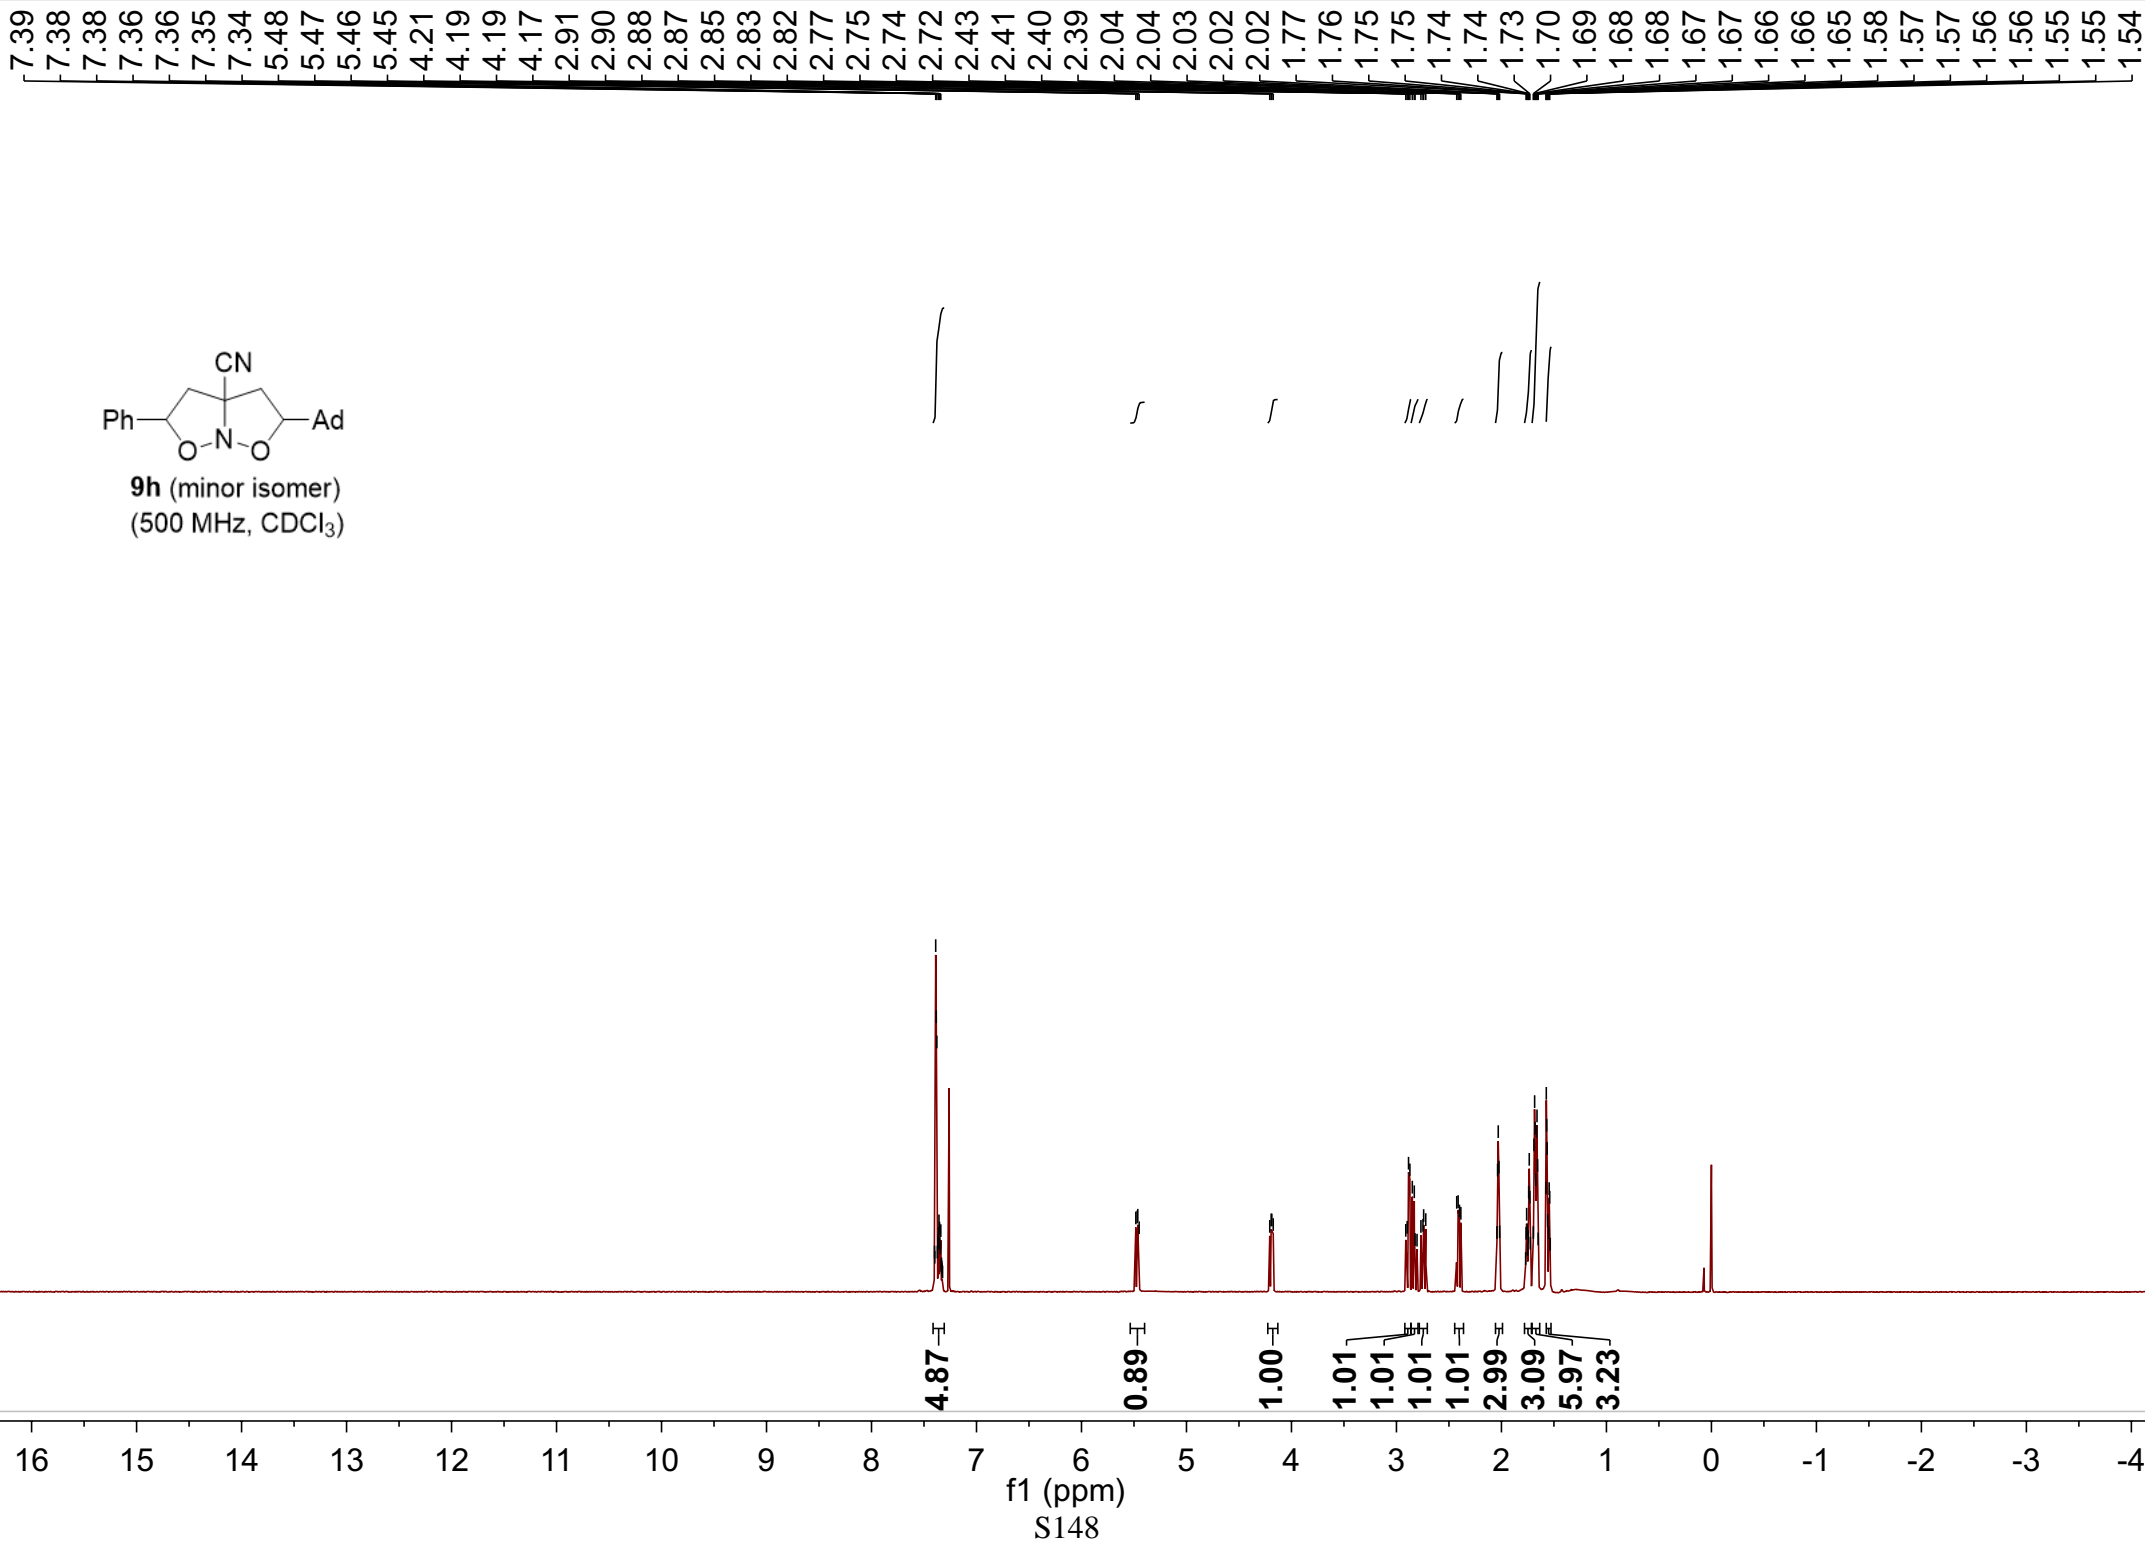

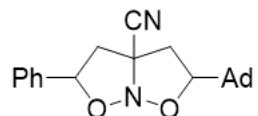

**9h** (minor isomer)  
(125 MHz, CDCl<sub>3</sub>)

— 137.16  
— 129.02  
— 128.96  
— 126.63  
— 118.94  
  
— 90.47  
— 83.27  
— 72.92  
  
— 47.87  
— 38.74  
— 38.25  
— 37.03  
— 35.10  
— 28.08

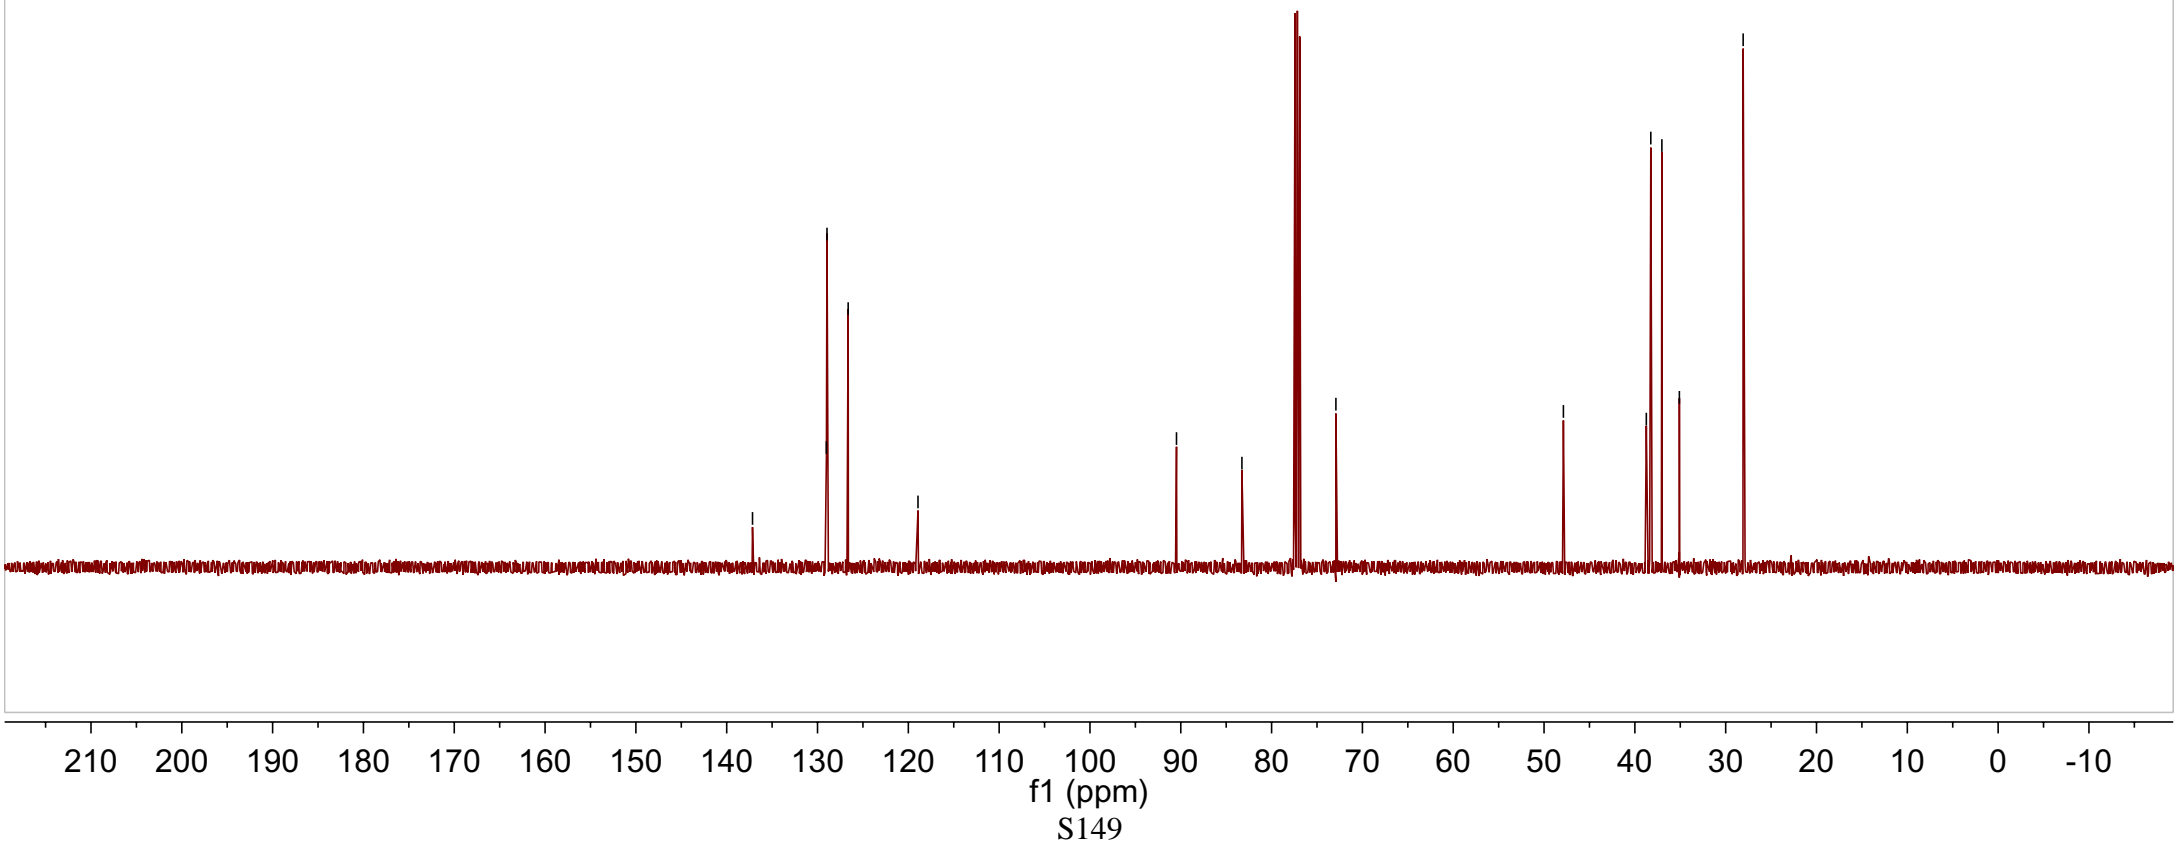

## 12. Copies of NOESY Spectra

NOESY Spectra of 9a (major isomer):

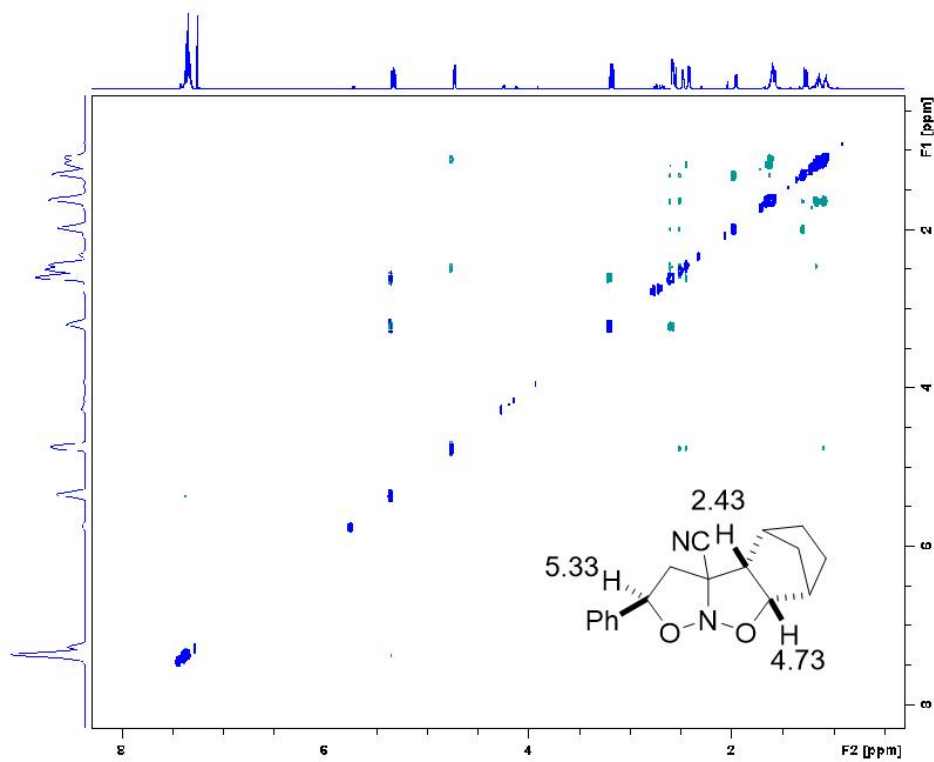

NOESY Spectra of 9a' (minor isomer):

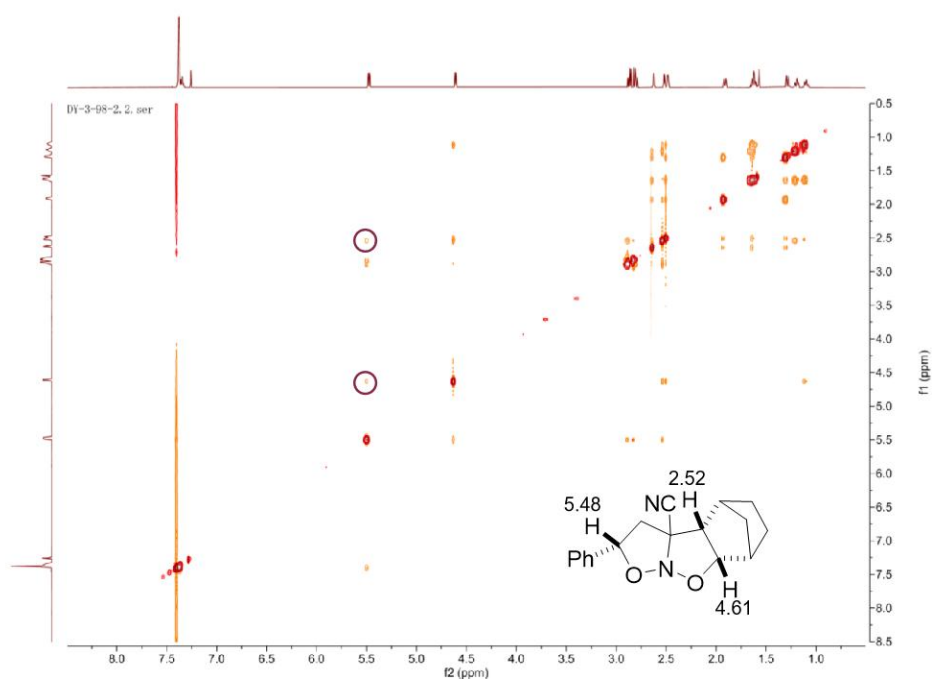

Supplement: d3qo01991h1.pdf [file d3qo01991h1.pdf]
